# Supplementary material for: Systematic analysis of synergistic proteome modulations in a drug combination of cisplatin and MLN4924
Source: Royal Society of Chemistry journal article supplement (doi:10.1039/c8mo00115d), 2018-09-20
Supplement: c8mo00115d1.pdf [file c8mo00115d1.pdf]

## Supplementary Information

### Systematic analysis of synergistic proteome modulations in a drug combination of cisplatin and MLN4924

Dominik Andre Megger,<sup>\*a,b</sup> Shadi Abou-Eid,<sup>a,c</sup> Birgit Zülch<sup>a</sup> and Barbara Sitek<sup>a</sup>

<sup>a</sup> Medizinisches Proteom-Center, Ruhr Universität Bochum, Bochum, Germany

<sup>b</sup> Institute for Virology, University Hospital Essen, University Duisburg-Essen, Essen, Germany

<sup>c</sup> Department of Biology, University of Fribourg, Switzerland

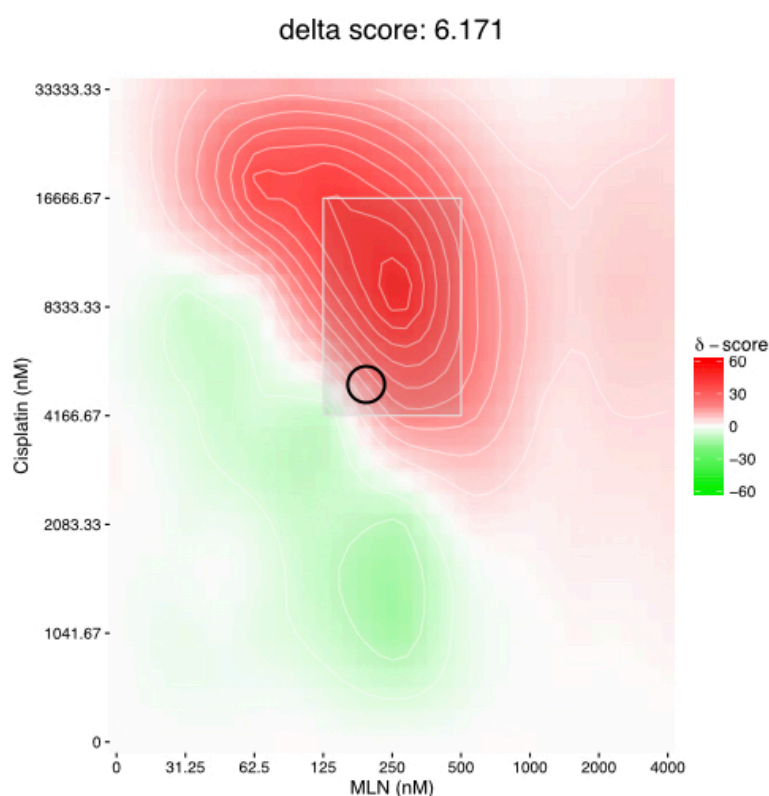

**Figure S1.** Synergy analysis using SynergyFinder application (<https://synergyfinder.fimm.fi>). The heat map shows synergistic scores (ZIP scoring) depending on concentrations of MLN4924 and Cisplatin. Red color indicates synergistic interaction, whereas green color indicates antagonistic effects. The light grey rectangle highlights the region of highest synergy in the respective combination. The conditions used in the proteomics experiment (Cisplatin: 5  $\mu$ M, MLN4924: 0.2  $\mu$ M) is indicated by a black circle, which lies in the region of highest synergy.
