# Supplementary material for: Systematic analysis of synergistic proteome modulations in a drug combination of cisplatin and MLN4924
Source: Royal Society of Chemistry journal article supplement (doi:10.1039/c8mo00115d), 2018-09-20
Supplement: c8mo00115d2.xlsx [file c8mo00115d2.xlsx]

## Sheet: Quantified proteins
					UNTREATED						MLN4924						CISPLATIN						COMBI (MLN4924+CISPLATIN)							Tukey-HSD test			Log2 ratios			neg Log10 p values
Accession	Peptide count	Unique peptides	Confidence score	Description	Replicate 1	Replicate 2	Replicate 3	Replicate 4	Replicate 5	Replicate 6	Replicate 1	Replicate 2	Replicate 3	Replicate 4	Replicate 5	Replicate 6	Replicate 1	Replicate 2	Replicate 3	Replicate 4	Replicate 5	Replicate 6	Replicate 1	Replicate 2	Replicate 3	Replicate 4	Replicate 5	Replicate 6	p ANOVA FDR	MLN-untreated	Cisplatin-untreated	Combi-untreated	MLN/untreated	Cisplatin/untreated	Combi/untreated	MLN-untreated	Cisplatin-untreated	Combi-untreated
P82933	2	2	151.96	28S ribosomal protein S9, mitochondrial OS=Homo sapiens GN=MRPS9 PE=1 SV=2 - [RT09_HUMAN]	12129.9	18311	49442.9	33685.1	54154	97914.6	25018.1	67930.5	24190.9	63744.8	42458.1	38386.1	20692	56531.2	35560.9	29715.4	34632.4	91560.6	17859.1	42445.8	15616.9	34364.8	23081.9	76945.5	0.320155	1	1	1	-0.021387	0.0164965	-0.336914	3.53283e-10	5.25297e-11	1.89931e-08
P20337	5	2	330.84	Ras-related protein Rab-3B OS=Homo sapiens GN=RAB3B PE=1 SV=2 - [RAB3B_HUMAN]	4729.63	4372.94	13203	1775.13	2571.32	1502.2	3312.77	2899.66	4785.26	5162.66	2825.85	2351.09	9574	6829.86	8133.08	4651.67	4869.36	1958.96	3637.57	2172.73	1242.71	1846.61	725.735	515.223	9.35273e-06	1	1	0.999992	-0.399973	0.355325	-1.47321	0	1.19639e-11	3.31701e-06
Q16637	2	2	183.06	Survival motor neuron protein OS=Homo sapiens GN=SMN1 PE=1 SV=1 - [SMN_HUMAN]	26760.9	36548.2	21714.6	45420.8	37628.6	31243.1	27590.1	43926.3	20685.3	52671.8	35449.4	34147	28893.3	31850.3	15260.4	63349.1	22241.7	30249.3	58430.1	66551.1	50674.5	75145.2	52524.8	60126.8	1.71551e-14	1	1	0.184301	0.105717	-0.0551254	0.866708	0	2.64251e-09	0.734472
P53999	2	2	78.12	Activated RNA polymerase II transcriptional coactivator p15 OS=Homo sapiens GN=SUB1 PE=1 SV=3 - [TCP4_HUMAN]	4694.5	19605.2	1969.9	2575.62	1447.64	8686.75	4027.89	7030.19	5917.84	7997.79	10580	9481.45	4062.37	9929.07	1974.56	10378.8	7003.33	5740.09	28239.8	78174.7	15260.7	36883.1	33217.3	37227	2.42926e-19	0.956682	0.999956	1.22191e-07	0.208332	0.00401549	2.55457	0.0192324	1.90905e-05	6.91296
Q9C0B1	2	2	115.93	Alpha-ketoglutarate-dependent dioxygenase FTO OS=Homo sapiens GN=FTO PE=1 SV=3 - [FTO_HUMAN]	1475.82	2337.73	3190.12	773.567	2178.11	0	1880.69	1123.76	2876.61	1740.27	1947.7	862.147	1640.79	1270.69	2757.3	506.64	1582.93	208.57	839.148	0	337.786	649.571	196.192	0	0.00111141	0.99999	1	0.981663	0.0673573	-0.321451	-2.29919	4.22858e-06	2.39457e-09	0.00803771
P08240	2	2	74.57	Signal recognition particle receptor subunit alpha OS=Homo sapiens GN=SRPR PE=1 SV=2 - [SRPR_HUMAN]	5065.04	4773.73	4448.81	3561.53	3941.23	4822.24	4059.36	7058.92	5147.29	1660.43	2064.57	4366.62	4307.65	5717.44	4701.32	6297.56	2364.6	4415.54	2676.86	3808.07	4304.44	2193.94	1851.38	3622.8	0.00426947	0.999964	1	0.900741	-0.127762	0.0631886	-0.527902	1.55116e-05	0	0.0454003
O95571	2	2	108.53	Persulfide dioxygenase ETHE1, mitochondrial OS=Homo sapiens GN=ETHE1 PE=1 SV=2 - [ETHE1_HUMAN]	33949.2	33750.6	26121.2	37121.8	36277.5	32527.7	34128.8	37360.9	23688.8	35099.3	26062.1	25618.7	33805.4	33539.8	37310.2	49062.7	27613.7	41605.5	38584.8	44993.8	50126.5	26050.4	29242.5	35336.5	2.07833e-09	0.999991	0.999994	0.999996	-0.134571	0.158457	0.16747	3.74184e-06	2.41867e-06	1.55317e-06
O43709	2	2	59.6	Uncharacterized methyltransferase WBSCR22 OS=Homo sapiens GN=WBSCR22 PE=1 SV=2 - [WBS22_HUMAN]	22413.5	22697.8	22468.5	20663.7	24042.1	21146.2	26179.5	25416.2	24852	23610.2	24673.6	27407.5	18473.8	19769.5	21513	17038.4	14407.9	21989.1	21411.8	12635.1	17332.1	17592.8	23378	16708.2	1.48072e-08	0.9999	0.996683	0.96328	0.18929	-0.237334	-0.291006	4.35472e-05	0.00144312	0.0162474
Q9NUQ3	2	2	95.53	Gamma-taxilin OS=Homo sapiens GN=TXLNG PE=1 SV=2 - [TXLNG_HUMAN]	1645.95	6933.73	3932.96	13421.9	13035.2	12684.6	8017.99	6876.16	5346.39	8720.85	6029.56	11018.9	6522.21	8016.33	6147.07	10767.9	8599.85	15908.9	5678.97	5425.64	7996.53	5946.64	8610.58	8008.91	1.60472e-10	1	0.999466	1	-0.166947	0.115564	-0.309975	2.51891e-11	0.000231888	0
Q6DKJ4	2	2	153.13	Nucleoredoxin OS=Homo sapiens GN=NXN PE=1 SV=2 - [NXN_HUMAN]	30000.9	27138.5	26841	36908.3	42772.8	33376.7	28039.8	22534.3	27324.1	22631.1	29995.6	25559.7	40005.6	29477.2	37973.6	39027.8	37347.7	35206.4	15377.4	9225	17003.8	16205.5	24174.1	10697.3	5.95084e-15	0.946106	0.999978	2.27494e-06	-0.336146	0.152707	-1.0881	0.0240604	9.40609e-06	5.64303
Q86W92	2	2	114.98	Liprin-beta-1 OS=Homo sapiens GN=PPFIBP1 PE=1 SV=2 - [LIPB1_HUMAN]	12478.8	7961.37	7376.41	5370.81	4629.67	11230.1	8687.64	7494.16	7293.36	3588.49	5279.29	7552.35	11882.2	10243.5	10488.7	9049.9	6439.92	9761.27	8459.59	6309.98	9349.82	4760.61	5828.96	6717.18	0.0558553	0.999908	0.99943	0.999999	-0.297951	0.238535	-0.243629	3.99529e-05	0.000247479	3.12568e-07
Q92615	2	2	113.26	La-related protein 4B OS=Homo sapiens GN=LARP4B PE=1 SV=3 - [LAR4B_HUMAN]	16648.4	16988.8	19767.9	14438.6	17236.1	20058.3	21090	15676.5	14555.5	16654.7	13381.9	13942.7	17622.6	17607.5	20067.5	17369.7	12189.6	21099	15665.8	9888.85	12995.4	9097.01	12216.6	12759.3	1.96699e-15	0.999882	1	0.0316166	-0.141719	0.0111796	-0.53379	5.1277e-05	0	1.50008
P51398	2	2	106.83	28S ribosomal protein S29, mitochondrial OS=Homo sapiens GN=DAP3 PE=1 SV=1 - [RT29_HUMAN]	24710.6	29365.7	29289.8	30877.4	26071.9	34712.5	25996.6	28220.1	22909.6	24246.7	29595.5	36864.7	32343.2	36557.8	28035.8	32980.4	30973.3	35129.9	40943.2	44563.7	31810	42267.3	30359	43607.8	9.50089e-06	1	0.999437	0.315654	-0.0605585	0.16342	0.416153	5.66139e-10	0.000244394	0.500789
Q9H251	2	2	35.82	Cadherin-23 OS=Homo sapiens GN=CDH23 PE=1 SV=2 - [CAD23_HUMAN]	327108	386507	421360	430661	454015	264564	407672	411520	449505	541037	561737	592378	287490	339976	335902	364075	361988	294951	566177	543886	340148	669888	694874	876445	1.89704e-16	0.990762	0.999999	0.517907	0.375774	-0.203007	0.692478	0.00403072	2.49277e-07	0.285748
P07305	3	2	160.19	Histone H1.0 OS=Homo sapiens GN=H1F0 PE=1 SV=3 - [H10_HUMAN]	48671.2	35140.4	36273.3	31422.6	31941.2	16494.2	26012.7	28987.1	42039	23373.6	29917.8	27675.2	33831.6	38538	30891.8	38641.2	46062.8	21188.4	27003	33963.2	27394.6	30154.9	14228.7	19487.5	0.00299348	1	1	0.959822	-0.167668	0.064976	-0.393316	5.46556e-09	6.44037e-11	0.0178094
Q6UX04	2	2	118.47	Peptidyl-prolyl cis-trans isomerase CWC27 homolog OS=Homo sapiens GN=CWC27 PE=1 SV=1 - [CWC27_HUMAN]	13448.8	12591.5	16575.4	10507.7	13250.7	8777.41	13056.7	10992.6	15906.4	13515.8	11218.6	11095.6	12774.9	9697.47	12732.3	12316.3	7724.37	11801	8876.21	8258.09	8572.71	8270.84	9963.07	7338.95	0.000212728	1	0.99999	0.292437	0.012126	-0.164639	-0.551408	0	4.46864e-06	0.533968
Q9Y3C4	2	2	101.15	TP53RK-binding protein OS=Homo sapiens GN=TPRKB PE=1 SV=1 - [TPRKB_HUMAN]	1763.8	1766.91	3497.49	872.581	2105.83	34.9819	1684.99	1222.85	2527.86	934.565	1900.82	613.031	1363.14	1297.29	2188.56	929.423	1546.15	174.575	405.782	205.822	569.428	651.273	634.034	17.9165	2.9268e-06	1	1	0.989513	-0.176688	-0.421192	-2.0151	4.00011e-11	0	0.00457835
Q8NB90	3	2	76.02	Spermatogenesis-associated protein 5 OS=Homo sapiens GN=SPATA5 PE=1 SV=3 - [SPAT5_HUMAN]	3548.13	1424.32	2595.49	1006.71	1673.62	0	818.145	2060.82	1639.61	1359.46	1831.92	796.634	1013.54	1702.17	2698.34	937.574	1765.35	153.203	641.067	151.885	686.651	796.663	446.414	0	0.0106836	1	1	1	-0.268727	-0.309388	-1.91228	4.08228e-08	4.4398e-10	1.80415e-07
Q9BTC0	2	2	72.57	Death-inducer obliterator 1 OS=Homo sapiens GN=DIDO1 PE=1 SV=5 - [DIDO1_HUMAN]	8634.84	5557.4	6359.83	8517.34	9146.19	7326.94	4722.39	7663.41	7553.39	10740.8	6422.02	6994.91	7456.17	5923.48	8467.08	10650.3	6071.41	7091.78	7550.11	4421.62	7120.79	6397.94	8125.76	7915.11	0.435622	1	1	1	-0.0465359	0.00372433	-0.133015	3.33561e-13	0	5.53982e-08
Q99797	2	2	66.74	Mitochondrial intermediate peptidase OS=Homo sapiens GN=MIPEP PE=1 SV=2 - [MIPEP_HUMAN]	7510.13	8990.2	11754	13339.7	9216.78	7227.3	7483.14	7188.46	8448.39	13114	8272.1	7252.08	10776.7	6897.79	11049.3	10219.2	8283.57	8383.45	7237.21	6703.31	4508.58	7882.99	5952.48	3556.83	0.00189509	1	1	0.759839	-0.165215	-0.0616571	-0.695374	1.04565e-09	0	0.119278
P06280	2	2	130.77	Alpha-galactosidase A OS=Homo sapiens GN=GLA PE=1 SV=1 - [AGAL_HUMAN]	8772.12	14797.5	14522	11937.4	13435.8	13836.4	11805.9	21856.2	17830.9	14409.2	13630.7	15862.1	8821.5	10275.5	13247	14905.4	11984.4	14974.2	18248	23793	21317.7	20386.6	20952.4	24753.8	5.76379e-14	0.99036	1	0.02897	0.303423	-0.0589153	0.743849	0.00420688	4.97255e-13	1.53805
Q7L5D6	2	2	62.89	Golgi to ER traffic protein 4 homolog OS=Homo sapiens GN=GET4 PE=1 SV=1 - [GET4_HUMAN]	7343.47	9164.38	7222.46	1720.24	2578.72	5730.05	4857.32	8726.84	6059.94	2302.32	2936.56	5947.84	8465.74	7079.75	6583.32	2418.38	2235.61	5050.37	5151.44	3213.78	5018.73	1742.21	3009.21	3466.61	0.765006	1	1	0.999378	-0.130912	-0.0847551	-0.644122	0	0	0.000270248
P02788	2	2	90.44	Lactotransferrin OS=Homo sapiens GN=LTF PE=1 SV=6 - [TRFL_HUMAN]	20729.2	24464	22497.8	41322.8	40169.8	24489.8	35655.7	29624.5	23401.8	49485.5	32527.8	40343.3	17054.8	31748.7	28440.2	36252.9	30036.4	29962	33388	61868.8	27223.1	62688.2	38888.2	81272.1	3.01778e-11	0.999807	1	0.379311	0.281132	-0.00148057	0.813986	8.39582e-05	0	0.421004
P49902	2	2	90.74	Cytosolic purine 5'-nucleotidase OS=Homo sapiens GN=NT5C2 PE=1 SV=1 - [5NTC_HUMAN]	12936.4	9898.14	14396.3	7499.67	11927.9	9296	12765.2	10043	8998.58	3801.68	6501.14	6959.31	14910.7	11849.3	14706.7	6223.12	9857.1	13768.5	7899.59	3565.5	6489.22	6371.53	7793.22	3826.87	1.33081e-09	0.995452	1	0.500474	-0.42666	0.112746	-0.87564	0.00197985	0	0.300618
P57678	4	2	145.2	Gem-associated protein 4 OS=Homo sapiens GN=GEMIN4 PE=1 SV=2 - [GEMI4_HUMAN]	16166.2	4687.19	21484.4	2449.84	4640.46	380.892	3421.25	1834.55	10280.7	10241.2	7703.24	845.534	12704.4	2908.46	14063.1	7039.46	7372.05	706.215	2884.46	1680.66	3016.25	4797.74	1013.29	110.781	0.0178825	1	1	0.99999	-0.537083	-0.153108	-1.88311	0	0	4.53142e-06
Q9H0U9	2	2	133.97	Testis-specific Y-encoded-like protein 1 OS=Homo sapiens GN=TSPYL1 PE=1 SV=3 - [TSYL1_HUMAN]	3078.47	3491.08	516.755	4323.9	2114.36	4983.8	5851.07	4444.13	2795.91	8108.15	3538.48	8898.31	417.599	433.562	2851.43	1096	1817.86	8111	3223.8	3137.44	7932.38	5401.23	8706.27	21194.7	1.38805e-09	0.888109	0.98489	0.464687	0.86183	-0.32967	1.42204	0.051534	0.00661233	0.33284
Q96S59	2	2	89.82	Ran-binding protein 9 OS=Homo sapiens GN=RANBP9 PE=1 SV=1 - [RANB9_HUMAN]	13885.1	11667.3	12106.7	12667.2	10481.7	15638.6	14941	11594.2	11832.4	12733.7	14090	11955.1	14044.1	10807.2	11561	10697.3	9930.43	12298.2	11932.4	6666.29	10994.7	10139	10417	10402.2	3.55662e-06	1	0.999998	0.900741	0.0131468	-0.140802	-0.336288	0	7.0176e-07	0.0454001
A6NJ78	2	2	47.6	Probable methyltransferase-like protein 15 OS=Homo sapiens GN=METTL15 PE=2 SV=1 - [MET15_HUMAN]	12833.1	15359.4	25248.1	7126.29	7151.84	19165.8	11969.6	12261.8	13137.5	5693.54	6263.74	14422.7	15626.4	15227.3	27129.2	7665.66	10108.2	20686.3	7729.48	7917.72	12914.6	6624.51	8365.96	9234.06	0.00341411	0.998437	1	0.877933	-0.446702	0.150577	-0.718935	0.00067931	1.71357e-08	0.0565389
P80303	2	2	75.62	Nucleobindin-2 OS=Homo sapiens GN=NUCB2 PE=1 SV=2 - [NUCB2_HUMAN]	10631.5	11676.1	13717.6	13946.7	14203.5	15517.4	17397.2	19250.3	16190.2	16283.3	12019.4	16985.2	13060	12971.9	14091.2	13067.4	6102.7	13586	20166.3	17504.2	16553.7	9614.79	26048.9	16331.8	6.63159e-06	0.998056	0.999999	0.981804	0.300181	-0.128945	0.41453	0.000845045	3.77575e-07	0.00797526
Q9NWH9	2	2	34.44	SAFB-like transcription modulator OS=Homo sapiens GN=SLTM PE=1 SV=2 - [SLTM_HUMAN]	1282.11	1719.6	2803.71	4977.35	2742.83	1316.92	2763.19	1257.17	1227.38	7186.41	2857.6	1854.8	2424.72	2326.05	1269.15	5830.6	1417.33	1546.12	2891.22	3596.38	3847.25	4653.75	3417.29	2204.02	1.35971e-09	1	1	1	0.208182	-0.0027784	0.473601	0	0	1.30878e-09
Q9BWU0	2	2	47.28	Kanadaptin OS=Homo sapiens GN=SLC4A1AP PE=1 SV=1 - [NADAP_HUMAN]	8219.51	7152.24	8723.37	7411.95	8590.11	8548.03	8766.21	9939.68	8076.86	14071.6	9533.59	7908.47	7201.45	7251.19	7888.89	11451.3	7689.9	7656.39	10015.9	14035	12307.1	11923.2	13870.7	12416.6	4.56494e-16	0.997685	1	0.0958006	0.261109	0.0145733	0.61627	0.00100677	0	1.01863
Q02750	7	2	389.86	Dual specificity mitogen-activated protein kinase kinase 1 OS=Homo sapiens GN=MAP2K1 PE=1 SV=2 - [MP2K1_HUMAN]	14073.8	15683.6	14069.9	3533	6953.16	5974.33	10011.3	8733.66	11513.6	4208.94	3235.55	6691.74	16457.6	12956.2	12983.7	5113.77	6374.64	6954.72	11278	8486.14	5897.7	1871.19	1379.53	2673.95	0.00022893	1	1	0.949201	-0.441474	0.0131718	-0.932555	1.48037e-08	0	0.0226417
P63098	2	2	96.69	Calcineurin subunit B type 1 OS=Homo sapiens GN=PPP3R1 PE=1 SV=2 - [CANB1_HUMAN]	26455.9	11927.2	22902	948.857	2418.29	98.1384	7274.16	9432.89	17976.5	6572.59	4866.6	1176.73	16781.1	13096.1	12817.4	1649.71	5561.45	189.213	4578.22	9584.22	3121.7	2756.22	211.783	0	0.0250328	1	1	0.999498	-0.453066	-0.370221	-1.67682	5.14073e-12	0	0.000217905
P30049	2	2	152.48	ATP synthase subunit delta, mitochondrial OS=Homo sapiens GN=ATP5D PE=1 SV=2 - [ATPD_HUMAN]	70517.1	72474.3	33557.5	82894.2	51971.6	67013.6	81021.4	108479	50283.3	105560	75907.2	93050.6	54481.3	89120.1	33419.4	92779.9	72198.9	66118.5	126865	202703	95550.7	128885	112704	135322	1.47801e-05	0.995951	1	0.112502	0.442595	0.108967	1.08364	0.00176193	0	0.948838
Q8NI22	2	2	85.95	Multiple coagulation factor deficiency protein 2 OS=Homo sapiens GN=MCFD2 PE=1 SV=1 - [MCFD2_HUMAN]	18651.9	15189.3	7874.99	466.155	1319.25	14726.9	22323.5	30094	12138.1	2935.42	68.5655	15525.6	12837.3	19076.3	8458.28	2062.46	1012.19	14314.5	18991.6	43328.3	21058.8	385.328	5097.18	25373.2	0.992176	1	1	0.999998	0.512865	-0.0116288	0.972199	0	0	7.36558e-07
P35244	2	2	106.55	Replication protein A 14 kDa subunit OS=Homo sapiens GN=RPA3 PE=1 SV=1 - [RFA3_HUMAN]	33063.8	32547.8	24509.9	6483.87	9906.61	45122.1	24516.8	22089.7	42043	8404.34	19917.1	59649.9	43878.2	45411	29078.3	10264.4	13354.6	44571	62134.8	78299.7	56688	18275.2	18537.7	68245.3	0.645334	1	0.999999	0.820151	0.220062	0.299026	0.994818	1.52648e-09	3.17079e-07	0.086106
Q15004	2	2	110.44	PCNA-associated factor OS=Homo sapiens GN=KIAA0101 PE=1 SV=1 - [PAF15_HUMAN]	6049.72	6940.99	3369.33	16515.3	7902.77	10630.8	20776.3	30836	11475.3	25716.9	15062.8	18437.4	4599.27	8956.55	5863.71	6155.33	6963.77	7882.26	24826.5	27541.6	31306.6	25994.8	29042.3	30158.8	1.95983e-21	3.91089e-06	0.999954	4.86291e-10	1.25039	-0.346917	1.71583	5.40772	1.99227e-05	9.3131
O95456	2	2	97.93	Proteasome assembly chaperone 1 OS=Homo sapiens GN=PSMG1 PE=1 SV=1 - [PSMG1_HUMAN]	16784.3	17517.2	21974.5	10644.6	14823.4	11178.8	13278.8	13465.6	15928	5116.74	10918.6	12605.5	16125.9	16478.3	17435.2	8650.39	11425.7	13141.8	8986.25	6089.72	8686.13	7457.02	8689.21	6108.24	6.62989e-08	0.953707	1	0.0101568	-0.381862	-0.158456	-1.01388	0.0205851	4.94493e-08	1.99324
Q13257	2	2	214.3	Mitotic spindle assembly checkpoint protein MAD2A OS=Homo sapiens GN=MAD2L1 PE=1 SV=1 - [MD2L1_HUMAN]	21960.5	21169.2	22973.2	7223.31	13947.1	1960.87	12864.2	12582.8	18029.2	14553.3	8901.34	6373.4	14996.4	12185.5	18597.1	7497.35	7835.07	3292.25	9894.47	5818.46	5976.83	5730.69	6715.26	30.3829	7.07259e-06	1	1	0.603664	-0.283699	-0.470452	-1.38503	0	9.59795e-13	0.219205
Q9BV44	2	2	101.62	THUMP domain-containing protein 3 OS=Homo sapiens GN=THUMPD3 PE=1 SV=1 - [THUM3_HUMAN]	10385.2	8740.8	8453.92	4557.47	8089.81	4452	7114.3	3848.39	4018.94	1915.06	3852.85	5643.79	7644.6	5377.19	9027.05	2516.97	6227.8	5191.18	2779.42	2281.59	1911.55	1180.22	3503.02	695.867	6.26804e-12	0.816742	0.999981	0.000204174	-0.759431	-0.312217	-1.8549	0.0879152	8.25247e-06	3.69
Q9UBR2	2	2	76.67	Cathepsin Z OS=Homo sapiens GN=CTSZ PE=1 SV=1 - [CATZ_HUMAN]	21263.5	23483.7	20447.8	21812.5	27776.3	22282.4	20043	21515.1	17930.3	15036.3	13116.8	18557.6	27106	16086	27829.6	18383.9	15458.8	29823.2	17875	13533.2	16027.8	12494.8	14118.6	12184.5	1.15936e-09	0.970452	1	0.258836	-0.368102	-0.0252578	-0.668545	0.0130259	0	0.586976
Q15041	2	2	63.83	ADP-ribosylation factor-like protein 6-interacting protein 1 OS=Homo sapiens GN=ARL6IP1 PE=1 SV=2 - [AR6P1_HUMAN]	75338.9	78022.4	50006.9	66128.8	45265.1	64820.5	90645.9	105067	71898.2	92534.8	71837.5	73733.2	74454.6	97359.5	62477	82749.5	58049.3	65283.6	113234	188119	125814	143929	93969.7	113940	4.53296e-10	0.587344	0.998499	1.0297e-05	0.413914	0.214314	1.03722	0.231107	0.000652156	4.98729
Q8WVY7	2	2	113.66	Ubiquitin-like domain-containing CTD phosphatase 1 OS=Homo sapiens GN=UBLCP1 PE=1 SV=2 - [UBCP1_HUMAN]	4168.77	9046.84	9204.24	5483.81	6377.42	10210.7	8005.68	3806.39	4796.53	1370	4505.09	5764.67	8421.76	7174.79	6196.07	2176.3	6127.59	9845.6	3217.43	1308.93	2829.44	1615.41	5977.03	2769.41	0.124747	0.999997	1	0.989127	-0.655372	-0.155629	-1.32835	1.34611e-06	0	0.00474794
Q2VPK5	2	2	80.13	Cytoplasmic tRNA 2-thiolation protein 2 OS=Homo sapiens GN=CTU2 PE=1 SV=1 - [CTU2_HUMAN]	3496.53	2483.62	3490.92	482.352	927.257	281.598	668.374	650.951	1041.71	379.203	361.312	871.479	2273.24	1508.52	2260.83	208.379	1032.62	808.232	238.768	0	267.792	262.206	135.599	328.85	0.000137594	1	1	0.814342	-1.49032	-0.464097	-3.17814	4.90889e-09	0	0.089193
Q9UID3	2	2	64.79	Vacuolar protein sorting-associated protein 51 homolog OS=Homo sapiens GN=VPS51 PE=1 SV=2 - [VPS51_HUMAN]	2114.85	3404.19	2726.55	2120.89	3030.38	1489.96	1856.37	1681.53	1870.71	721.158	310.951	1885.18	2141.22	2367.93	2491.12	1814.07	1773.18	1868.33	441.173	374.75	809.629	639.512	985.406	1123.19	1.16091e-15	0.0692267	0.999999	3.96768e-06	-0.838358	-0.257213	-1.76712	1.15973	3.66926e-07	5.40146
P07099	2	2	94.36	Epoxide hydrolase 1 OS=Homo sapiens GN=EPHX1 PE=1 SV=1 - [HYEP_HUMAN]	27660.1	22809.8	23337	14637.1	13648	25179	31584.4	41600.9	31443.9	26000	19626.2	34805.5	21552.7	29558.7	29350.8	18621.4	14414	26968.4	40679.6	68950.2	38620.9	27393.9	41112.9	54202.5	1.22537e-05	0.677062	1	0.00239502	0.540096	0.142317	1.09018	0.169372	2.20034e-08	2.62069
O15173	2	2	89.92	Membrane-associated progesterone receptor component 2 OS=Homo sapiens GN=PGRMC2 PE=1 SV=1 - [PGRC2_HUMAN]	11973.2	15290.3	14267.8	6571.21	7099.24	3412.03	12918.8	14869.5	7922.62	12430.7	7301.02	9112.31	11605.1	14669.5	13454.5	11595.8	6875.21	7495.24	14909.5	21363.7	15522.9	11746	9152.45	8926.08	0.00228113	0.999949	0.999863	0.797841	0.139287	0.164551	0.477691	2.20032e-05	5.95147e-05	0.0980838
Q9NYB0	2	2	199.23	Telomeric repeat-binding factor 2-interacting protein 1 OS=Homo sapiens GN=TERF2IP PE=1 SV=1 - [TE2IP_HUMAN]	9996.09	10565.9	7435.68	11976.2	11842.2	11267	13467.4	9647.86	9816.23	15545.2	12049.7	11830.8	9226.7	9007.37	11967.5	10300.6	16295.1	10415.6	13931.3	13838.5	12839.4	14518	13035	18275.9	3.67088e-08	0.999889	1	0.598669	0.197884	0.0914854	0.454415	4.83595e-05	4.12415e-11	0.222813
O75146	2	2	103.7	Huntingtin-interacting protein 1-related protein OS=Homo sapiens GN=HIP1R PE=1 SV=2 - [HIP1R_HUMAN]	13141.9	14022	12743.3	26895.6	20234.9	12238.2	20299.2	22738.7	14489.9	29462.9	27846.8	24598.5	16735.9	17128.6	14856.2	24752.3	15592.6	14831.4	27492.1	33495.3	17544.4	33550.4	35696.2	33146.4	1.65355e-18	0.736761	1	0.0252441	0.490085	0.0656367	0.865874	0.132673	2.37572e-10	1.59784
Q07864	2	2	101.85	DNA polymerase epsilon catalytic subunit A OS=Homo sapiens GN=POLE PE=1 SV=5 - [DPOE1_HUMAN]	7334.61	7263.74	4290.11	3338.96	3876.24	6652.96	7491.19	6657.11	4755.66	3807.38	2806.65	6576.25	5790.64	3932.56	3767.54	3359.86	2965.18	5330.17	958.814	4297.32	5209.07	3031.33	2873.91	4677.01	0.0521132	1	0.999951	0.838158	-0.0294719	-0.38146	-0.638141	0	2.12134e-05	0.0766739
Q96C19	8	2	395.24	EF-hand domain-containing protein D2 OS=Homo sapiens GN=EFHD2 PE=1 SV=1 - [EFHD2_HUMAN]	5452.65	7024.7	4678.26	15148.5	9768.44	19060.2	7540.22	7986.8	9815.58	5124.31	3180.76	8167.62	8469.72	12494.7	12434.4	11770.8	9768.44	20708.9	7220.6	11635	9448.76	4507.25	5101.88	9290.09	0.00303168	0.999966	0.999974	1	-0.547916	0.307336	-0.373049	1.48837e-05	1.13658e-05	4.79225e-09
O00203	2	2	127.53	AP-3 complex subunit beta-1 OS=Homo sapiens GN=AP3B1 PE=1 SV=3 - [AP3B1_HUMAN]	28207.9	29533.8	27110.5	30241.5	26500.8	36917.3	20023.7	22821.7	13679.5	17593.7	13563.4	19561.1	21325.4	23174.1	22368.6	83783.3	25345.8	32183.2	13345.5	17739.7	15018.7	16422.7	22003.6	19113.9	4.57622e-08	0.00681129	1	0.00300176	-0.735134	0.221815	-0.784383	2.16677	0	2.52262
Q9HD33	2	2	78.29	39S ribosomal protein L47, mitochondrial OS=Homo sapiens GN=MRPL47 PE=1 SV=2 - [RM47_HUMAN]	13120.2	16621.2	9001.14	23952.9	14867.4	18727.4	16349.7	17044.8	13183.7	35992.2	19231.1	24826.7	11988.9	15160.6	9193.57	24735.1	15577.6	14972.2	13410.2	24878.7	16753.2	31768.1	21823.8	27009.4	0.0021213	0.987167	1	0.859404	0.395138	-0.0716008	0.49436	0.00560945	0	0.0658027
P40938	2	2	48.22	Replication factor C subunit 3 OS=Homo sapiens GN=RFC3 PE=1 SV=2 - [RFC3_HUMAN]	5825.69	3630.52	7032.32	17558.9	11589.7	8812.77	8007.5	2317.16	7519.15	14984.2	11922.3	3957.74	4570.47	1272.29	9593.51	11974.9	10341.3	6064.81	3323.62	1048.71	6747.66	12116.9	6938.37	3501.63	0.841826	1	1	0.999136	-0.160768	-0.31343	-0.693169	8.57287e-13	2.20455e-08	0.000375515
Q92575	2	2	22.1	UBX domain-containing protein 4 OS=Homo sapiens GN=UBXN4 PE=1 SV=2 - [UBXN4_HUMAN]	13055.2	17503.2	13055.8	696.07	394.385	20895.6	17147.3	17221.9	8630.61	1941.03	1128.97	15066.9	9988.42	15749.3	14505	1704.85	808.6	15436.1	7363.1	10246.6	13699.4	648.898	6096.82	12204.9	0.890002	1	1	1	-0.101663	-0.172875	-0.3843	9.01598e-13	0	0
Q14165	2	2	169.64	Malectin OS=Homo sapiens GN=MLEC PE=1 SV=1 - [MLEC_HUMAN]	46900.7	38765.2	32520.1	79722.4	73081	67988.2	51554.6	49641.3	42038.1	105750	83896.8	75673.3	44992.9	54124.4	42567.6	69261.3	87539.5	75422.3	58530.5	94080.2	53557.6	118428	98533.2	78912.5	3.45162e-05	0.994559	0.999987	0.202491	0.269338	0.141494	0.566618	0.00236943	5.66812e-06	0.693593
P36543	4	2	213.99	V-type proton ATPase subunit E 1 OS=Homo sapiens GN=ATP6V1E1 PE=1 SV=1 - [VATE1_HUMAN]	10599.5	12526.4	10193.2	12035.9	11126.6	11730.7	15566.8	15232.3	12901.8	13576.6	11941.4	12041.1	10760.9	11209.8	12948.3	12215	11059.5	11755.6	16185.6	17240.5	14644	15563.7	12748.8	13106	2.70648e-12	0.655597	1	0.0436233	0.252516	0.0362758	0.391675	0.183363	2.79771e-12	1.36028
O60762	2	2	152.99	Dolichol-phosphate mannosyltransferase OS=Homo sapiens GN=DPM1 PE=1 SV=1 - [DPM1_HUMAN]	41712.7	31712.1	34238	40519.8	32522.3	49877.1	37457.5	45490.5	32168.1	37956.4	26695.5	44373.7	46074.8	41026	42607.6	35460.2	29547.6	44573.2	34060.9	58170.2	26543.9	35069.5	36785.3	42647.1	0.00789218	1	1	1	-0.0408695	0.0534768	0.0167626	3.46579e-13	1.43738e-11	0
P29590	2	2	135.38	Protein PML OS=Homo sapiens GN=PML PE=1 SV=3 - [PML_HUMAN]	22543.9	19014.7	13100.3	16286.3	16961.4	24977.2	15141.2	19217.7	14613.3	16602.5	13249.7	18600.1	24694.9	20458	21977.8	19384.1	21830	30586.8	19805	20077.2	20610.3	18814.6	23500.2	19500.2	4.83897e-09	0.998441	0.833703	0.999963	-0.212484	0.299534	0.115673	0.000677434	0.0789888	1.58955e-05
O75600	2	2	87.02	2-amino-3-ketobutyrate coenzyme A ligase, mitochondrial OS=Homo sapiens GN=GCAT PE=1 SV=1 - [KBL_HUMAN]	4951.87	5891.69	6290.49	9642.88	7288.16	6082.91	1563.67	1249.2	958.69	1647.1	1076.57	1648.99	5421.38	6330.1	8964.49	6153.7	3275.96	8406.72	1154.1	824.398	343.766	737.592	1360.87	360.863	9.39753e-18	4.93417e-05	1	2.89387e-09	-2.30148	-0.0585094	-3.06977	4.30679	0	8.53852
Q13596	2	2	93.99	Sorting nexin-1 OS=Homo sapiens GN=SNX1 PE=1 SV=3 - [SNX1_HUMAN]	28744.4	25302.3	17387.2	42034.4	27358.6	29208.3	37017.9	47080.7	66497.9	95112.6	71959.9	68401.8	33171	35495.8	19031.9	35537	26276.6	30041.6	85140.9	118579	85485	81313.5	60657.7	95052.9	4.50138e-13	0.000615338	1	1.07156e-07	1.18303	0.0785842	1.62986	3.21089	2.14676e-11	6.96998
Q9BTX1	2	2	80.71	Nucleoporin NDC1 OS=Homo sapiens GN=NDC1 PE=1 SV=2 - [NDC1_HUMAN]	13145.8	14707.9	13794.7	24334.9	19211.1	17683.3	16093.2	25581.7	19233.3	39470.5	22567.3	20434.7	10818	14259.8	17456.4	23381.1	14542.3	15449.8	18928.8	27226.6	20418.6	30392.5	22170.1	25115.7	1.49298e-07	0.455704	1	0.270005	0.478921	-0.101215	0.487664	0.341317	2.94873e-08	0.568628
P20645	2	2	141.78	Cation-dependent mannose-6-phosphate receptor OS=Homo sapiens GN=M6PR PE=1 SV=1 - [MPRD_HUMAN]	22421	21001.1	7864.19	36636.2	19120.6	12720.6	30480.6	35690.1	24280	53427.4	43348.7	33929.2	17305.7	30003.7	10013.7	51831.9	34963.8	14790	48534	87748.2	50013.3	72710.1	64067	50686.3	2.51007e-09	0.01232	0.994195	3.24436e-08	0.884872	0.408008	1.64192	1.90939	0.00252842	7.48887
P53007	2	2	112.2	Tricarboxylate transport protein, mitochondrial OS=Homo sapiens GN=SLC25A1 PE=1 SV=2 - [TXTP_HUMAN]	4195.55	5718.3	2943.82	17139.7	13364.4	6465.63	6202.42	9419.65	6857.9	18458.6	25904.2	14240.8	7263.26	12727.3	5267.11	10018.9	25030.5	5689.32	13071.5	34344.3	9065.35	25539	24138.5	25643.5	0.00153474	0.900939	0.999672	0.0306474	0.70247	0.405447	1.40336	0.0453045	0.000142338	1.51361
Q02127	2	2	80.22	Dihydroorotate dehydrogenase (quinone), mitochondrial OS=Homo sapiens GN=DHODH PE=1 SV=3 - [PYRD_HUMAN]	5956.25	6952.1	3884.55	11181.5	7580.43	7877.89	9880.39	10251.4	5723.22	9337.11	8911.3	9425.12	4993.65	8273.62	5480.98	18596.4	7789.04	9205.18	10958.6	15322.7	10222.8	12321.4	13158.3	12962.2	0.0615067	0.99564	0.999934	0.0995594	0.301528	0.323203	0.787069	0.00189777	2.85044e-05	1.00192
Q9HD45	2	2	73.38	Transmembrane 9 superfamily member 3 OS=Homo sapiens GN=TM9SF3 PE=1 SV=2 - [TM9S3_HUMAN]	12112.3	8304.66	5987.97	19536.7	17727.7	10890.8	15263.2	16409.7	9112.55	25371.3	20374.7	18573	11735.5	19833.9	5835.68	27425.5	22428.9	15098.8	23103.5	47802	16069.5	43737.9	25026.3	11721.6	0.00304806	0.938155	0.996039	0.0417625	0.495349	0.457152	1.16735	0.0277254	0.00172353	1.37921
Q13415	3	2	141.86	Origin recognition complex subunit 1 OS=Homo sapiens GN=ORC1 PE=1 SV=2 - [ORC1_HUMAN]	3294.2	3175.62	2998.92	5458.42	4888.45	3553.79	14174.5	18279	10413.5	24796.4	18792.2	16465.8	15.6447	2492.26	2830.56	2945.66	3560.15	3336.21	12509.3	10619.3	13115.5	15216	14406.4	16490.5	1.01524e-15	0.0153888	0.228725	0.0759522	2.13885	-0.622402	1.81727	1.8128	0.640687	1.11946
P18615	2	2	94.61	Negative elongation factor E OS=Homo sapiens GN=NELFE PE=1 SV=3 - [NELFE_HUMAN]	34217.2	33663.9	28054.3	21173.1	23826.4	29692.9	30644.8	25896.3	24448.1	15331.9	21463.3	27015.4	29406.6	23112.3	28344.8	20944.3	17025.4	26667.7	21823.9	17866.9	19191.4	19088.7	19966.7	18579.8	0.387047	0.993658	0.996763	0.203765	-0.236792	-0.229822	-0.550307	0.00276328	0.00140829	0.69087
O60524	2	2	55.34	Nuclear export mediator factor NEMF OS=Homo sapiens GN=NEMF PE=1 SV=4 - [NEMF_HUMAN]	1307.39	5264.61	3548.82	4242	6558.92	7482.76	5096.63	4275.68	3119.81	6232.59	3973.59	3261.1	3067.57	8760.74	4530.78	9758.54	3566.48	5347.57	6586.52	5207.44	5428.86	5218.03	5049.93	5122.44	2.03454e-13	1	0.994613	0.988967	-0.129862	0.302541	0.199338	0	0.00234568	0.00481824
Q99808	2	2	103.43	Equilibrative nucleoside transporter 1 OS=Homo sapiens GN=SLC29A1 PE=1 SV=3 - [S29A1_HUMAN]	5646.52	2753.62	5656.78	14252.3	13796.6	5573.75	6164.19	4703.15	9521.11	9542.17	13261.5	9011.56	7237.82	6730.59	7126.34	13563.1	13372.4	5393.15	7714.06	10062.8	8893.73	16972.8	10173.7	6271.84	0.207114	0.999834	0.999626	0.931291	0.130783	0.164101	0.333727	7.19381e-05	0.000162487	0.0309147
Q6ZRV2	2	2	82.87	Protein FAM83H OS=Homo sapiens GN=FAM83H PE=1 SV=3 - [FA83H_HUMAN]	4478.09	3535.6	2560.31	1629.17	3365.64	5159.46	3678.05	4255.86	2793.11	4143.83	2782.18	4127.03	4663.48	3480.24	4562.15	3593.67	4947.08	6556.46	3665.14	7362.89	4873.96	4645.14	3799.91	6196.81	7.02488e-09	1	0.977439	0.855433	0.0714082	0.423645	0.559283	4.30907e-10	0.00991018	0.0678138
O75915	2	2	81.65	PRA1 family protein 3 OS=Homo sapiens GN=ARL6IP5 PE=1 SV=1 - [PRAF3_HUMAN]	13497.5	16438	19830.1	28639.3	21914.1	21564.3	10172.9	12537.2	7553.56	15445.1	10897.6	10787.8	16757.3	19692.4	25764.4	32515.3	21953.8	22115	9051.04	9266.52	10318.7	15650.2	19542	8601.19	9.48254e-13	0.00057805	0.99959	0.00229408	-0.854807	0.187488	-0.750848	3.23803	0.000178092	2.63939
P49458	2	2	113.61	Signal recognition particle 9 kDa protein OS=Homo sapiens GN=SRP9 PE=1 SV=2 - [SRP09_HUMAN]	171391	192059	154072	210826	194427	238172	219528	263162	234727	220654	199240	296823	200117	222670	167012	191431	220527	261514	263759	313878	256688	204627	257123	320522	2.32821e-08	0.390769	0.999775	0.00713711	0.304878	0.121862	0.477659	0.40808	9.77722e-05	2.14648
Q9HD20	2	2	63.59	Probable cation-transporting ATPase 13A1 OS=Homo sapiens GN=ATP13A1 PE=1 SV=2 - [AT131_HUMAN]	19661.7	20483.1	15207	36525.3	27032	33962.8	30847.1	27265.9	20181.8	38222.3	30170.7	23565.3	21278.1	24690.3	22449.1	34109.3	31831.4	28611.7	28789.1	31424.9	32551.4	34168.3	32304.7	25908.8	0.032532	0.999505	0.999995	0.863551	0.155358	0.0922827	0.27635	0.000215031	2.11937e-06	0.0637122
P62306	2	2	112.96	Small nuclear ribonucleoprotein F OS=Homo sapiens GN=SNRPF PE=1 SV=1 - [RUXF_HUMAN]	42062.6	39705.1	37553.3	64923.6	55216	43991.3	57614.1	70028.1	60218.3	92561.6	69671.6	67161.8	49390.3	64678.8	43784.3	74769.5	67810.1	57098.2	88396.7	124978	95315.2	104335	61234.6	86183.6	6.13273e-10	0.126615	0.890583	3.48208e-05	0.557827	0.334965	0.983464	0.897515	0.0503255	4.45816
Q96QD9	2	2	77.01	UAP56-interacting factor OS=Homo sapiens GN=FYTTD1 PE=1 SV=3 - [UIF_HUMAN]	2334.17	2920.62	1515.03	5266.27	3033.39	2226.33	12335.5	6543.89	5744.79	17808.6	11230.5	8350.1	2199.01	555.61	1272.91	3583.92	1757.16	908.748	6005.67	3408.9	6134.03	11394.7	5397.34	6957.95	1.56503e-10	0.52025	0.998826	0.971916	1.84216	-0.750954	1.18406	0.283788	0.000510302	0.0123712
Q13308	2	2	110.22	Inactive tyrosine-protein kinase 7 OS=Homo sapiens GN=PTK7 PE=1 SV=2 - [PTK7_HUMAN]	20877.8	22080.7	14256.6	23568.7	20394.7	30903.3	20518.2	15504	13654.4	16833.2	17680.4	22948.9	19730.7	21577.8	16211.5	17735.9	19244.9	26114	15294.1	14383.2	15044.8	14285.7	15202.3	21265.5	1.73775e-09	0.73609	0.99999	0.0736044	-0.301948	-0.131024	-0.468228	0.133069	4.37337e-06	1.1331
O43324	2	2	125.48	Eukaryotic translation elongation factor 1 epsilon-1 OS=Homo sapiens GN=EEF1E1 PE=1 SV=1 - [MCA3_HUMAN]	8794.07	6522.32	16624.1	11443.1	11561.1	6160.01	7850.87	2179.73	8183.43	5488.8	9239.13	5191.25	7060.69	6079.18	12870.6	13452.7	9262.63	5003.59	4112.14	4869.57	5546.5	10665.3	4564.95	2348.94	0.0693384	0.995705	1	0.922609	-0.680236	-0.185573	-0.928379	0.0018692	6.17174e-12	0.0349825
O95671	2	2	126.13	N-acetylserotonin O-methyltransferase-like protein OS=Homo sapiens GN=ASMTL PE=1 SV=3 - [ASML_HUMAN]	12782.2	13778.2	10888.3	7801.6	11439.2	12358.4	8100.56	9986.75	7318.78	4477.22	4922.88	7868.51	10231.8	9821.63	9133.01	6128.88	6992.04	8713.33	5968.11	3539.59	3295.85	1844.26	8175.99	7191.74	2.61119e-11	0.367849	0.970835	0.000247424	-0.694217	-0.436514	-1.20189	0.43433	0.0128546	3.60656
Q05655	2	2	64.83	Protein kinase C delta type OS=Homo sapiens GN=PRKCD PE=1 SV=2 - [KPCD_HUMAN]	1992.45	1702.51	2283.14	2842.47	1761.51	4701.21	716.977	1986.83	947.193	0	428.711	784.524	2407.47	3060.55	3755.64	4138.6	1991.43	5142.35	1016.32	137.523	1597.91	855.082	576.273	2016.4	0.000672335	0.00530788	1	0.797921	-1.65167	0.42339	-1.30173	2.27508	1.35346e-08	0.0980402
Q7L273	2	2	85.81	BTB/POZ domain-containing protein KCTD9 OS=Homo sapiens GN=KCTD9 PE=2 SV=1 - [KCTD9_HUMAN]	2740.26	553.829	1022.03	8494.79	1206.17	1083.98	9608.44	6051.45	7319.8	5682.74	7419.19	6798.49	1699.01	0	1186.68	10764.8	1392.17	1195.45	8958.16	8034.54	8293.13	4774.15	10738.4	8179.28	1.44937e-06	0.391339	0.811959	0.259855	1.50566	0.104733	1.69747	0.407447	0.0904657	0.585269
Q13405	2	2	170.35	39S ribosomal protein L49, mitochondrial OS=Homo sapiens GN=MRPL49 PE=1 SV=1 - [RM49_HUMAN]	32187.7	22915.8	25220.6	28729.8	28280.3	41368.9	32190.3	27683.4	30713.4	30322.5	29960.2	36162.5	26174.8	33167.4	29398.4	46615.1	37359.6	35889.2	31323.9	44505.3	36502.2	39012.6	31515.5	37619.6	0.00644595	1	0.99895	0.957619	0.0657219	0.223206	0.303077	3.96055e-10	0.000456318	0.0188072
P26006	2	2	48.13	Integrin alpha-3 OS=Homo sapiens GN=ITGA3 PE=1 SV=5 - [ITA3_HUMAN]	2160.11	1459.1	815.664	3947.01	2577.65	1690.43	2568.77	1516.71	1744.8	1855.79	2600.57	1915.11	1431.52	2343.44	1477.19	4505.26	3000.93	1523.48	1978.14	3183.47	2020.48	3043.08	2050.76	1544.02	0.0285016	1	1	0.999999	-0.0520466	0.175046	0.127621	0	2.5983e-08	5.44878e-07
O75352	2	2	113.06	Mannose-P-dolichol utilization defect 1 protein OS=Homo sapiens GN=MPDU1 PE=1 SV=2 - [MPU1_HUMAN]	6369.74	6306.67	4390.44	8672.04	6044.89	4837.32	12072.6	12248.6	8029.06	15824.1	9436.24	8522.55	5420.53	8552.42	6740.46	11405.3	6379.39	5553.42	14849.6	22593.7	10402.7	13256.2	12269.7	8522.45	4.1007e-09	0.00125207	0.995204	2.05341e-06	0.852698	0.266518	1.16109	2.90237	0.00208786	5.68752
P61201	3	2	234.7	COP9 signalosome complex subunit 2 OS=Homo sapiens GN=COPS2 PE=1 SV=1 - [CSN2_HUMAN]	43768	39170.2	42555	45752.8	48682.3	46102.3	30703.5	47126.8	33066.3	31996.2	36749.7	29785.2	40013.6	43978.4	43792.7	41821.2	32957	40775.5	33833.6	22425.2	30290.6	27349.5	41959.9	33384.5	0.105776	0.827596	0.999998	0.245334	-0.345141	-0.128628	-0.491351	0.0821816	6.5409e-07	0.610242
Q14376	2	2	121.18	UDP-glucose 4-epimerase OS=Homo sapiens GN=GALE PE=1 SV=2 - [GALE_HUMAN]	17473.5	10835	9010.09	1448.9	4514.38	22387.7	7195.62	9860.55	3203.41	73.6635	803.706	6450.94	9704.78	11884.9	6791.62	1211.43	1008.55	16667	4636.22	3047.26	2269.36	309.363	2235.54	6785.76	0.00326524	0.898585	1	0.942402	-1.25119	-0.474351	-1.76786	0.046441	8.51324e-08	0.025764
P62913	2	2	116.95	60S ribosomal protein L11 OS=Homo sapiens GN=RPL11 PE=1 SV=2 - [RL11_HUMAN]	351648	273291	254310	240908	184182	366157	393510	271953	407310	259992	323279	475474	312218	404823	191259	365744	383190	314428	395036	509394	418995	481718	238553	489802	8.31397e-11	0.995595	0.999975	0.67895	0.351605	0.239136	0.600854	0.00191718	1.07574e-05	0.168162
Q8TCJ2	3	2	114.38	Dolichyl-diphosphooligosaccharide--protein glycosyltransferase subunit STT3B OS=Homo sapiens GN=STT3B PE=1 SV=1 - [STT3B_HUMAN]	13746.2	9601.03	4468.75	26745.9	19458.4	14673.8	21505.7	22478.3	10717.3	43244.5	24711.5	22480.4	16615.3	17077.8	6926.24	43901.3	23868.1	23071.2	34118.2	49680.2	18077.9	43086.7	41894.8	29400.7	5.97807e-05	0.340121	0.871573	0.000474403	0.710511	0.567712	1.28585	0.468367	0.0596963	3.32385
Q12929	2	2	133.14	Epidermal growth factor receptor kinase substrate 8 OS=Homo sapiens GN=EPS8 PE=1 SV=1 - [EPS8_HUMAN]	9564.65	8950.74	9413.14	9382.19	10215.3	7160.79	16676.8	14934.3	10610.4	12523.9	13746.9	14904.6	9141.71	11812.8	5671.81	10840.5	7273.06	8825.24	14867.3	9412.31	9787.27	10065.6	20958.9	16557	8.00572e-11	0.111241	1	0.309096	0.608801	-0.0298977	0.578233	0.953735	2.10243e-12	0.509906
Q9NX02	2	2	153.1	NACHT, LRR and PYD domains-containing protein 2 OS=Homo sapiens GN=NLRP2 PE=1 SV=1 - [NALP2_HUMAN]	9042.65	9407.07	5791.62	1147.05	3785.76	13337.4	5054.23	4450.22	1784.53	1585.18	96.5481	2186.02	9042.06	8203.79	6476.92	1838.77	3682.27	13086.8	4478.45	3535.54	87.9992	91.8854	2384.67	4532.06	1.51873e-06	0.939696	1	0.664308	-1.4879	-0.00615316	-1.49229	0.0270127	0	0.17763
Q8WTT2	3	2	203.59	Nucleolar complex protein 3 homolog OS=Homo sapiens GN=NOC3L PE=1 SV=1 - [NOC3L_HUMAN]	34441.9	39919.7	36718.5	47043.1	33629.1	43545.2	47441.3	54028.3	47426	66058.9	38415.6	47991.1	42820.6	48267.8	42191	50867.2	30758.1	44407.4	50575.6	56383.5	54473	55599.7	52748	62180.2	1.03251e-07	0.529428	0.999951	0.0442776	0.357007	0.140203	0.496523	0.276193	2.12863e-05	1.35382
Q8N5K1	2	2	175.59	CDGSH iron-sulfur domain-containing protein 2 OS=Homo sapiens GN=CISD2 PE=1 SV=1 - [CISD2_HUMAN]	33315.7	30819.7	32103.9	56005	53372.5	34314.7	63483.4	65278.4	48793.4	56690.9	38275.5	49706.4	30547.4	59724.3	48342	70638.3	40366.5	52190.9	57607.7	92031	57504.3	61488.3	72977.1	63228.5	0.00015128	0.199891	0.735862	0.000112535	0.42546	0.331015	0.754718	0.699208	0.133203	3.94871
Q9Y3D0	2	2	92.7	Mitotic spindle-associated MMXD complex subunit MIP18 OS=Homo sapiens GN=FAM96B PE=1 SV=1 - [MIP18_HUMAN]	24329.4	33853.2	34017.3	36581.3	45467.7	38686.2	29016.8	30312.5	20453	14752.9	32572.5	26392.9	27544.2	32127.4	31611.1	33162.6	30351	34686.8	15169.2	23646.9	22756	25528.4	26660.4	23045.4	9.17379e-08	0.133107	0.999955	0.00942081	-0.472169	-0.168345	-0.638278	0.875798	1.96323e-05	2.02591
O75506	2	2	95.01	Heat shock factor-binding protein 1 OS=Homo sapiens GN=HSBP1 PE=1 SV=1 - [HSBP1_HUMAN]	45333.7	55412.9	44699.5	13603.2	18875.1	57578.8	153666	157149	110592	38701.7	31864.3	146571	40500.8	46627.8	46744	15613.9	13022.1	52427.5	125116	95741.9	126803	23344.2	78978.4	129755	9.15091e-06	0.154823	1	0.221156	1.43904	-0.131838	1.29966	0.810163	4.94218e-13	0.655302
P54709	2	2	82.83	Sodium/potassium-transporting ATPase subunit beta-3 OS=Homo sapiens GN=ATP1B3 PE=1 SV=1 - [AT1B3_HUMAN]	35448.6	30051	16716.1	69450.9	43202.7	45857.9	74266.7	59626.3	69045.3	84435.3	81190.8	93961.2	51964.7	62157.8	28332.6	90732.7	79371.9	56138.8	114477	142403	84517.4	140180	111907	107970	1.02843e-12	4.70801e-05	0.0822324	4.67454e-10	0.942134	0.615042	1.54295	4.32716	1.08496	9.33026
Q9Y446	2	2	153.87	Plakophilin-3 OS=Homo sapiens GN=PKP3 PE=1 SV=1 - [PKP3_HUMAN]	14838.3	22127.9	10322.8	11234.5	10967	24120.7	7824.33	7695.69	3728.26	1973.17	1145.55	2553.16	15307.1	11670	13979	10130	4505.99	19431.8	2041.47	7994.44	3232.81	1947.87	1970.31	3098.82	9.69393e-21	5.9597e-06	0.999899	6.95876e-07	-1.90937	-0.319328	-2.20621	5.22478	4.40755e-05	6.15747
P05026	2	2	48.99	Sodium/potassium-transporting ATPase subunit beta-1 OS=Homo sapiens GN=ATP1B1 PE=1 SV=1 - [AT1B1_HUMAN]	7557.2	4619.53	1368.63	10677.2	5508.08	5029.25	18099.1	17259.8	19754	27772.1	26054.6	26875.4	11411.1	12278.7	2305.27	16021.2	14219.7	7061.5	39767.1	56477	27990.5	41514.1	35503.9	36740.8	2.20099e-16	6.60772e-08	0.337633	4.35837e-10	1.96615	0.864725	2.77543	7.17995	0.471556	9.36068
Q4VC31	2	2	63.39	Coiled-coil domain-containing protein 58 OS=Homo sapiens GN=CCDC58 PE=1 SV=1 - [CCD58_HUMAN]	23989.4	19895.9	20549.3	45989.5	33294.9	27097.2	27395.3	30192.1	16556.2	36698.5	29782.5	21644.8	19857.1	23326.4	23275.7	32328.6	23757.6	22491.2	23185.1	20074.6	24686.2	24819.7	24969.9	21047.5	0.0106204	1	0.999891	0.997575	-0.0740545	-0.236028	-0.299613	0	4.72825e-05	0.00105465
P56385	2	2	88.01	ATP synthase subunit e, mitochondrial OS=Homo sapiens GN=ATP5I PE=1 SV=2 - [ATP5I_HUMAN]	43453.2	43723.4	15767.5	57058.1	29558.5	32787.5	75991	97171.2	51390.4	120045	64475.7	68374	37043.6	82329.7	27628.5	116924	57452.5	46375.4	125519	195728	86172.1	149296	88760.1	100993	2.40323e-10	0.00143978	0.409204	2.44328e-08	1.10252	0.725921	1.74726	2.8417	0.38806	7.61203
Q96FF9	4	2	198.74	Sororin OS=Homo sapiens GN=CDCA5 PE=1 SV=1 - [CDCA5_HUMAN]	5264.41	4133.12	1945.36	3666.23	4665.39	2080.21	32091.1	39001.8	21460.9	32671.1	11466.3	28149.6	2362.12	7980.81	4221.41	1544.28	3033.33	4693.93	31265.5	34231.6	31710	13744	18679.9	33984.7	2.06733e-13	3.98194e-05	1	3.65676e-05	2.92167	0.131806	2.91091	4.3999	0	4.4369
Q9H9H4	2	2	92.61	Vacuolar protein sorting-associated protein 37B OS=Homo sapiens GN=VPS37B PE=1 SV=1 - [VP37B_HUMAN]	3837	6128.1	2934.74	2912.72	5117.13	6326.88	3527.67	3151.33	1918.61	1187.56	1733.73	1762.47	3644.11	2682.48	4622.41	2619.62	3184.78	6372.51	78.809	2714.88	2840.67	2289.96	1473.73	2417.04	3.64616e-08	0.384677	1	0.00362301	-1.0372	-0.237093	-1.20597	0.414904	2.48054e-08	2.44093
Q8N6R0	2	2	104.66	Methyltransferase-like protein 13 OS=Homo sapiens GN=METTL13 PE=1 SV=1 - [MET13_HUMAN]	6425.54	6415.18	4806.32	8067.86	6983.18	7008.53	1737.25	2229.85	3970.88	1914.92	1631.4	5118.39	8111.3	5454.37	3207.99	2381.56	4456.45	10846.5	1118.64	1579.84	3473.65	1937.87	3955	3266.48	2.84422e-10	0.0806219	0.99997	0.0365589	-1.25796	-0.204535	-1.37288	1.09355	1.32228e-05	1.43701
Q05048	2	2	48.38	Cleavage stimulation factor subunit 1 OS=Homo sapiens GN=CSTF1 PE=1 SV=1 - [CSTF1_HUMAN]	7790.74	13123	7228.27	14405.1	12454.4	12060.9	12534.8	13427.1	11568.6	14523.7	17148.8	16687.4	12827.5	15666.2	10312.6	17936	16302.1	14696.6	17005.6	16026.6	17313.4	21091.2	18454	18894.3	1.81494e-05	0.913557	0.868195	0.0551924	0.356993	0.387745	0.697903	0.0392645	0.0613825	1.25812
P62314	3	2	175.95	Small nuclear ribonucleoprotein Sm D1 OS=Homo sapiens GN=SNRPD1 PE=1 SV=1 - [SMD1_HUMAN]	81370.1	84979.7	79553.8	140053	109889	102009	115704	123677	141125	176063	172412	162159	119927	130185	96236.4	130974	132114	117338	162065	196209	161649	205277	110573	201225	1.72537e-10	0.036635	0.900199	0.000381458	0.575856	0.281712	0.794545	1.4361	0.0456616	3.41855
Q13509	42	2	2421.14	Tubulin beta-3 chain OS=Homo sapiens GN=TUBB3 PE=1 SV=2 - [TBB3_HUMAN]	21946.2	29140.3	32050	26168.3	28378.3	19915.2	8242.01	7250.62	6972.18	10719.3	15437.2	8355.9	30097.3	21463.9	26209.3	25281.4	21743.6	30616.7	11167.6	5284.68	10847.3	20033.1	9227.41	4952.52	1.07563e-12	0.0654512	1	0.0672038	-1.46779	-0.0201522	-1.3573	1.18408	0	1.17261
P60468	2	2	81.65	Protein transport protein Sec61 subunit beta OS=Homo sapiens GN=SEC61B PE=1 SV=2 - [SC61B_HUMAN]	33656	39937.2	20585.4	28880.4	27103.4	40184.6	53936.2	74063.5	33850	38781.2	21604.8	44466.9	33418.8	56298.4	38533	39672.6	24721.5	48836.8	55689.4	84799.2	52928.1	30187.8	40309.1	56745.3	0.000544498	0.978185	0.998354	0.381214	0.4866	0.343278	0.752407	0.0095792	0.000715498	0.418831
Q9HCE1	2	2	135.53	Putative helicase MOV-10 OS=Homo sapiens GN=MOV10 PE=1 SV=2 - [MOV10_HUMAN]	4681.05	760.332	2706.26	1831.46	2114.92	3962.76	4116.72	2134.26	3740.41	2059.38	3480.28	7086.85	5954.74	5558.96	2931.52	3486.12	6160.41	7722.49	8463.35	5778.87	7635.27	5465.78	4103.91	8491.97	3.06781e-05	0.995695	0.429455	0.0666567	0.494282	0.98649	1.31462	0.0018737	0.367083	1.17616
P15170	3	2	107.09	Eukaryotic peptide chain release factor GTP-binding subunit ERF3A OS=Homo sapiens GN=GSPT1 PE=1 SV=1 - [ERF3A_HUMAN]	14028.5	12396.9	17093.9	13135.5	15130.6	17218	9643.12	4828.91	8908.28	11159.9	12665.4	8279.45	11463.9	6142.52	14428.3	8205.74	12944.1	11649.1	9029.12	6889.22	5881.35	7506.6	9563.31	5326.8	1.79719e-08	0.0834889	0.651675	0.000826468	-0.68176	-0.457119	-1.00993	1.07837	0.185969	3.08277
Q9BXS6	2	2	102.56	Nucleolar and spindle-associated protein 1 OS=Homo sapiens GN=NUSAP1 PE=1 SV=1 - [NUSAP_HUMAN]	6439.07	7281.41	5699.56	9475.44	8327.78	12466.8	76125	73066.6	41467	90398.5	64323	61308.9	7273.96	9946.38	10750.6	8660.56	11009.9	12382.2	57901.9	48283.5	70674.5	62130.5	73537.7	61924.4	7.77168e-50	4.35368e-10	0.937051	4.35368e-10	3.0329	0.272572	2.91375	9.36114	0.0282367	9.36114
Q9Y5A9	2	2	107.54	YTH domain family protein 2 OS=Homo sapiens GN=YTHDF2 PE=1 SV=2 - [YTHD2_HUMAN]	19378.4	17110.8	11278.7	8571.08	6454.76	19203.2	13317.9	11879.7	7835.64	3584.1	5749.52	13981.1	10450	17983.7	8550.74	7123.84	9813.2	15715	7477.55	8396.44	12394.1	2319.79	6781.58	13750.7	0.0027616	0.992715	1	0.909588	-0.541206	-0.235727	-0.681677	0.00317545	6.06084e-10	0.0411551
Q9NYH9	2	2	157.26	U3 small nucleolar RNA-associated protein 6 homolog OS=Homo sapiens GN=UTP6 PE=1 SV=2 - [UTP6_HUMAN]	1206.08	2441.42	0	5911.51	1143.71	257.402	432.227	2286.83	7296.12	8371.37	11456.9	10027.3	1599.05	3519.12	1206.66	4014.31	2992.19	3338.19	6732.2	8270.61	5353.32	13867.4	2485.85	12240.6	0.0781056	0.350325	0.770567	0.106989	1.86307	0.604949	2.15905	0.455529	0.113189	0.97066
Q9NRX1	2	2	75.93	RNA-binding protein PNO1 OS=Homo sapiens GN=PNO1 PE=1 SV=1 - [PNO1_HUMAN]	10223.9	23572.2	19848.5	23290.2	17318.1	29416.6	28419.7	26682.3	31123.1	31505.9	25343.3	30414.7	21072.7	23412.3	18428.9	17114.5	18241.2	21909.6	27291.6	31333.2	26302.5	22163.4	21255.4	33613.5	3.14387e-16	0.0332777	1	0.240748	0.488353	-0.0413029	0.389143	1.47785	0	0.618437
O15213	2	2	152.04	WD repeat-containing protein 46 OS=Homo sapiens GN=WDR46 PE=1 SV=3 - [WDR46_HUMAN]	4297.99	9905.12	5470.82	6371.65	4836.49	5291.48	11405.9	13167.8	23246.2	16005	23385.6	28418.9	9553.1	8856.98	4181	7526.9	10670.5	8366.76	20223.3	22376.7	17828.4	25552.2	10943.3	31884.7	3.03462e-08	0.00672312	0.999599	0.00156873	1.6765	0.44241	1.83222	2.17243	0.000174238	2.80445
O75330	2	2	81.5	Hyaluronan mediated motility receptor OS=Homo sapiens GN=HMMR PE=1 SV=2 - [HMMR_HUMAN]	4385.34	2161.18	2052.02	9746.82	7378.07	7982.54	4804.51	5894.05	6439.71	12675.1	13444.2	19116	11201.3	9654.68	2157.76	4452.61	11519.3	11324.7	12934.2	9061.83	12924.7	13380.9	14660.1	17896.4	1.67421e-11	0.407918	0.96469	0.00836501	0.887931	0.577851	1.26239	0.389428	0.0156124	2.07753
P10909	2	2	117.24	Clusterin OS=Homo sapiens GN=CLU PE=1 SV=1 - [CLUS_HUMAN]	1878.58	557.767	1131.83	2569.11	910.431	966.016	6986.52	7817.74	4466.9	6176.53	4011.59	3972.7	2569.98	4704.75	2386	4765.42	2390.84	4094.19	9346.45	16402	6904.9	7621.48	9196.43	12312	3.49574e-20	0.000837705	0.11662	2.4631e-07	2.06068	1.38373	2.94667	3.07691	0.933226	6.60852
Q99543	2	2	120.2	DnaJ homolog subfamily C member 2 OS=Homo sapiens GN=DNAJC2 PE=1 SV=4 - [DNJC2_HUMAN]	10997.3	11212.6	6038.76	4715.67	2282.28	10439.6	12780	16380.8	8437.88	5022.49	3698.52	12649.6	10664.8	11981.4	3324.76	5584.03	4404.26	14131.6	11895.3	13277.8	10125.3	5420.42	8423.29	12287.5	2.27812e-07	0.999131	1	0.945048	0.368209	0.132789	0.427177	0.000377644	7.18862e-11	0.0245464
P12236	14	2	733.3	ADP/ATP translocase 3 OS=Homo sapiens GN=SLC25A6 PE=1 SV=4 - [ADT3_HUMAN]	22010.9	29050.5	10734	34815.9	28698.7	12463.7	39201.5	52144.4	50261.4	71918.3	72574.7	64135.3	30770.5	51141	16263.9	47849.8	48113.6	25226.3	89875.3	100752	44728	93975.7	65211.8	53289.2	1.89328e-12	1.59065e-05	0.364114	4.9188e-08	1.34603	0.671034	1.70066	4.79842	0.438763	7.30814
Q9BRT6	2	2	107.65	Protein LLP homolog OS=Homo sapiens GN=LLPH PE=2 SV=1 - [LLPH_HUMAN]	9194.11	7423.15	5931.04	2291.78	1032.87	3974.7	16367.1	11847	24379.4	8633.61	9103.74	26024.9	12690.7	8817.08	5250.65	4058.07	6863.99	6948.95	22925.1	25118.6	25601.1	12568.2	4747.17	21375.3	3.26585e-05	0.0730188	0.988718	0.0313855	1.69075	0.58038	1.91213	1.13657	0.00492736	1.50327
Q9Y6E2	4	2	268.97	Basic leucine zipper and W2 domain-containing protein 2 OS=Homo sapiens GN=BZW2 PE=1 SV=1 - [BZW2_HUMAN]	61122.5	65877.3	60532	57582.1	76103.1	93805.2	42153.5	43258.3	27866.6	24882.8	27828.4	42862.1	60967.1	48250	56196.4	42524.6	49514.4	77875.2	35271.6	24272	35485	24349.2	40671.6	35543.4	2.25307e-22	3.45726e-06	0.901185	3.68896e-07	-0.990709	-0.307617	-1.08534	5.46127	0.0451861	6.4331
Q9Y4X5	3	2	107.27	E3 ubiquitin-protein ligase ARIH1 OS=Homo sapiens GN=ARIH1 PE=1 SV=2 - [ARI1_HUMAN]	6280.96	6578.76	5389.42	6066.78	4459.03	1938.86	4819.39	4228.44	3591.44	2517.64	3350.97	2558.91	6095.48	3712.36	4741.19	2540.97	2909.2	1956.02	5622.99	2173.18	2234.05	2889.38	2842.56	1176.89	0.000180476	0.999714	0.999677	0.821418	-0.543919	-0.484324	-0.858535	0.000124439	0.000140131	0.0854356
P61011	2	2	94.23	Signal recognition particle 54 kDa protein OS=Homo sapiens GN=SRP54 PE=1 SV=1 - [SRP54_HUMAN]	39361	39171.6	44189.3	38312.4	41174.2	38572.4	32104.9	40604.2	28187.6	27872.2	24050.4	26228.9	33055.9	28917.7	35628.9	33565.4	33526.7	33143.2	28148.7	31008.7	30413.4	24394.1	27411	18294.9	1.80913e-05	0.0146722	0.507531	5.69629e-05	-0.427374	-0.283403	-0.59262	1.8335	0.294537	4.24441
P15374	2	2	114.42	Ubiquitin carboxyl-terminal hydrolase isozyme L3 OS=Homo sapiens GN=UCHL3 PE=1 SV=1 - [UCHL3_HUMAN]	7084.34	13391.5	10085.4	5059.46	6118.75	12135.2	6255.51	6317.6	5553.42	861.701	5311.89	4204.25	13987.2	13540.2	7753.82	6787.41	6163.06	12351.3	5307.38	5015.7	6226.96	3669.83	6311.96	8490.08	0.355684	0.866343	1	0.999781	-0.918424	0.169307	-0.621349	0.06231	1.36935e-12	9.52617e-05
Q15645	3	2	147.02	Pachytene checkpoint protein 2 homolog OS=Homo sapiens GN=TRIP13 PE=1 SV=2 - [PCH2_HUMAN]	9756.52	17753	11304.4	15203.3	12886.5	21062.2	8215.76	11242.4	5037.11	8825.02	9061.43	10233	6150.21	11843.8	9576.71	6510.11	10309.6	10532.8	4126.61	5270.97	5489.46	8161.2	5436.29	10482.4	2.75684e-15	0.0182521	0.0500583	1.02982e-06	-0.741478	-0.679529	-1.17469	1.73869	1.30052	5.98724
Q9BTE6	3	2	185.35	Alanyl-tRNA editing protein Aarsd1 OS=Homo sapiens GN=AARSD1 PE=1 SV=2 - [AASD1_HUMAN]	12284.7	13391	12102	8817.26	8181.98	11882.7	5605.85	5718.14	4558.85	2194.23	4250.15	4026.13	9210.12	7483.53	8774.78	6286.42	6954.14	11542	3856.9	2833.81	4644.97	3031.33	4992.83	5183.4	3.59956e-26	3.25327e-09	0.678887	8.069e-10	-1.33883	-0.40766	-1.44149	8.48768	0.168202	9.09318
Q16850	2	2	103.44	Lanosterol 14-alpha demethylase OS=Homo sapiens GN=CYP51A1 PE=1 SV=3 - [CP51A_HUMAN]	16231	20766.5	11327.6	9737.67	8919.38	24272.7	9871.11	9307	4633.23	4330.73	2768.91	10271.3	15399.4	21765.5	20213.5	10136.4	5238.13	19560.2	9966.79	8485.99	8976.03	4634.68	5859.83	9896.11	1.37004e-10	0.0646757	1	0.496098	-1.14788	0.0166329	-0.932304	1.18926	0	0.304433
Q6UN15	3	2	198.98	Pre-mRNA 3'-end-processing factor FIP1 OS=Homo sapiens GN=FIP1L1 PE=1 SV=1 - [FIP1_HUMAN]	34195.3	35332.2	23295.9	39019.9	35742.5	38874	50297.4	54187.9	34613.1	64093.7	41805.1	44134.6	33483.9	35194.9	30011.6	44411.7	28150.1	38152.4	46701.5	43830.6	46779	42036.2	42744.8	53257.7	6.94965e-06	0.448877	1	0.636349	0.485866	0.0204324	0.415405	0.347873	0	0.196304
Q15021	2	2	119.91	Condensin complex subunit 1 OS=Homo sapiens GN=NCAPD2 PE=1 SV=3 - [CND1_HUMAN]	6330.69	6861.49	6853.31	4034.22	4856.72	5896.3	4853.5	4668.4	3975.74	2043.06	2136.13	3846.92	4043.61	4053.33	5544.33	2368.08	2830.53	4371.05	2497.02	2587.87	3619.88	2003.82	2453	3678.09	1.5094e-05	0.682707	0.911039	0.129844	-0.694514	-0.585639	-1.04858	0.165766	0.0404628	0.886577
Q9Y3B2	2	2	151.85	Exosome complex component CSL4 OS=Homo sapiens GN=EXOSC1 PE=1 SV=1 - [EXOS1_HUMAN]	12384.1	13257	12374.1	18909.4	17819.7	21509.3	16214.6	16312.4	12457	20955.5	13853.9	16778.1	12288.7	14897.6	15053.9	17479.4	13928.6	16469.9	13354.7	17053.9	16442.7	16537.4	13274.7	14854.8	5.15114e-08	1	1	1	0.00475839	-0.0950229	-0.0727806	0	1.57431e-10	0
Q9NV31	3	2	139.82	U3 small nucleolar ribonucleoprotein protein IMP3 OS=Homo sapiens GN=IMP3 PE=1 SV=1 - [IMP3_HUMAN]	11656.3	11918.8	9239.28	7787.21	10249.4	14860.1	13732	19732	24253.1	22711.9	19068.2	30798.1	19959.2	17826.3	10702.3	10994.7	13953.6	18269	26141.1	28510.8	18632.1	23694.8	15665.5	35670.9	2.00143e-16	0.000403895	0.613117	9.30916e-06	0.987575	0.480865	1.17446	3.39373	0.212457	5.03109
P49366	2	2	104.26	Deoxyhypusine synthase OS=Homo sapiens GN=DHPS PE=1 SV=1 - [DHYS_HUMAN]	14493	9258.21	11135	9052.63	6316.05	8297.81	11070.7	10706.7	6582.25	6089.52	10965.6	7685.74	9914.59	4741	5349.2	3765.6	4154.86	7993.68	6032.5	5801.87	5327.32	6451.04	6860.27	6166.74	3.5263e-06	1	0.124829	0.36406	-0.141008	-0.704991	-0.676326	1.68314e-08	0.903685	0.438827
P21926	2	2	94.19	CD9 antigen OS=Homo sapiens GN=CD9 PE=1 SV=4 - [CD9_HUMAN]	72421.2	50595.3	50198.6	64541	45733.2	42556.1	95017.6	81210.6	103239	125184	105449	93994.1	111026	86974.6	67724.6	106974	100256	60380.4	201843	177341	87430.8	139589	88185.1	79916	1.65908e-09	0.00331076	0.079035	1.63348e-05	0.889699	0.709972	1.24783	2.48007	1.10218	4.78688
O00217	2	2	71.25	NADH dehydrogenase [ubiquinone] iron-sulfur protein 8, mitochondrial OS=Homo sapiens GN=NDUFS8 PE=1 SV=1 - [NDUS8_HUMAN]	12262.5	13988	5547.25	13571.4	12164.5	13232.6	16850	21567	19849.6	21614.1	20479.5	28080.1	17393.7	25472.8	14761.1	23040.9	21184.8	16144.9	23626.8	42096.9	21709.1	30538.5	22374.1	27144.5	2.84545e-05	0.0758617	0.254413	0.000791826	0.859963	0.737631	1.24294	1.11998	0.59446	3.10137
P12532	2	2	155.99	Creatine kinase U-type, mitochondrial OS=Homo sapiens GN=CKMT1A PE=1 SV=1 - [KCRU_HUMAN]	23759.3	26735.3	22360.6	21290.8	21030.4	33400.1	19776.2	17312.7	11358.7	6994.5	10364	15729.7	25052	27142.4	32566.2	24353.1	20277.5	37320	12504.9	19355.4	16895.9	13037.2	17203.7	23369.3	7.85784e-13	0.000578993	0.999994	0.273655	-0.865699	0.166146	-0.537465	3.23733	2.41436e-06	0.562796
Q9P2I0	2	2	111.62	Cleavage and polyadenylation specificity factor subunit 2 OS=Homo sapiens GN=CPSF2 PE=1 SV=2 - [CPSF2_HUMAN]	23014.9	15318.8	20137.8	23175.6	21361.7	19479.8	29174.5	32983.3	29215.6	33496.4	30454.5	34501.4	22742.7	16109.3	19968.7	23121.3	17710.5	20404.2	27207.1	24970.7	26371.9	25761.9	27207.9	37333.1	2.25149e-09	0.00877848	1	0.228914	0.632027	-0.0289319	0.463116	2.05658	0	0.640327
Q8IY67	2	2	82.6	Ribonucleoprotein PTB-binding 1 OS=Homo sapiens GN=RAVER1 PE=1 SV=1 - [RAVR1_HUMAN]	30629	39968.4	35876.1	44567.7	45557.2	47366.9	25793	22600.4	26170.1	17908.6	26487.7	20917	23128.4	20963.5	24886.2	58534.2	25311.2	24182.6	17311.4	17449.1	21475.3	19841.1	22167.3	26291.4	3.85066e-10	0.000164662	0.05365	1.52463e-06	-0.802518	-0.462877	-0.970118	3.78341	1.27043	5.81684
Q9P0V9	2	2	171.29	Septin-10 OS=Homo sapiens GN=SEPT10 PE=1 SV=2 - [SEP10_HUMAN]	5004	6063.95	4560.34	1855.93	2656.14	5271	8177.3	5212.27	8511.72	2555.15	5102.48	15105.9	5803.68	6049.28	3410.64	1094	4951	6590.95	8403.74	10607.4	4725.26	1905.83	2849.85	13454.5	0.000130149	0.994026	1	0.9999	0.813663	0.134767	0.723079	0.00260233	0	4.35831e-05
P50583	2	2	72.44	Bis(5'-nucleosyl)-tetraphosphatase [asymmetrical] OS=Homo sapiens GN=NUDT2 PE=1 SV=3 - [AP4A_HUMAN]	19578.2	22527.6	14920.1	16084.8	19447.9	13401.3	13633.7	17371.8	8402.64	10407.1	7913.79	16947.5	9949.34	11798.2	13137.2	8084.74	11128.3	16316.5	9217.76	12247.5	11143.4	11187.5	4906.85	10860	4.51403e-08	0.810667	0.692244	0.112331	-0.504792	-0.589576	-0.831031	0.0911573	0.159741	0.949502
Q9BX68	2	2	111.9	Histidine triad nucleotide-binding protein 2, mitochondrial OS=Homo sapiens GN=HINT2 PE=1 SV=1 - [HINT2_HUMAN]	56743.8	43111.3	33158	69646.9	52707.2	36306.8	38990	46890.8	28993	73152.4	46168.3	42719.1	52519.3	35456.9	29786.4	31483.7	30338.9	33143.2	29300.5	24074.8	30075.4	38303.1	68940.8	30084.9	0.0334018	1	0.979982	0.975202	-0.0749204	-0.455344	-0.401751	0	0.00878183	0.0109053
P21912	2	2	129.69	Succinate dehydrogenase [ubiquinone] iron-sulfur subunit, mitochondrial OS=Homo sapiens GN=SDHB PE=1 SV=3 - [DHSB_HUMAN]	28269.2	25575.1	16096.3	48493.7	30614.6	25434	42443.1	50098.4	31132.2	71202.7	48739.5	48321.6	34494.7	53613.9	23919.1	77240.2	42809.7	38402.2	54305.6	70584.5	41022.2	67556.2	61587.5	62030.6	4.1024e-08	0.0045237	0.0799129	4.18075e-06	0.742574	0.632435	1.03319	2.34451	1.09738	5.37875
O43592	2	2	83.8	Exportin-T OS=Homo sapiens GN=XPOT PE=1 SV=2 - [XPOT_HUMAN]	13697.6	16712	12566.5	2570.34	5251.41	12323.8	10116.3	13176.6	7166.58	779.718	3035.77	7353.04	9918.1	9845.09	8295.44	3726.92	3218.32	9599.18	5941.17	10326.2	7507.44	1334.53	3296.3	7220.87	0.310651	0.999994	1	0.999989	-0.600578	-0.500991	-0.825182	2.67677e-06	3.31528e-11	4.60468e-06
Q9Y285	2	2	100.66	Phenylalanine--tRNA ligase alpha subunit OS=Homo sapiens GN=FARSA PE=1 SV=3 - [SYFA_HUMAN]	33053.8	21154.6	23465	35650.4	24161.7	33746.2	37534.2	30022.8	35965.4	37123.4	42218.5	44157.8	32217.9	42534.5	21137.5	47730.7	52017.2	33872.8	36992.9	42444.7	39625.2	55606.9	40887.3	47668.4	1.16164e-09	0.876368	0.934351	0.251902	0.406883	0.422611	0.62035	0.0573135	0.02949	0.598768
P17096	2	2	131.61	High mobility group protein HMG-I/HMG-Y OS=Homo sapiens GN=HMGA1 PE=1 SV=3 - [HMGA1_HUMAN]	130482	88470.8	23380.6	44309	22135.3	58533.4	164332	217252	272976	96010.7	123375	321354	345264	385517	77153.4	81263.5	97376.8	252732	416577	694031	413061	132731	93565.9	429720	0.00116799	0.0454484	0.0970595	0.000462736	1.7023	1.75446	2.56904	1.34248	1.01296	3.33467
Q15435	2	2	147.68	Protein phosphatase 1 regulatory subunit 7 OS=Homo sapiens GN=PPP1R7 PE=1 SV=1 - [PP1R7_HUMAN]	15123.5	14540.8	17292	10754	13165.3	9929.38	10660.4	10055.1	9149.82	7773.8	8448.81	6700.61	13413.1	11195.2	13740.3	7139.02	11187.4	9933.72	9746.03	7915.94	6368.78	9106.58	9460.33	8600.52	1.01377e-09	0.00940841	0.887975	0.00356962	-0.614222	-0.278732	-0.658352	2.02648	0.0515994	2.44738
P62330	3	2	132.84	ADP-ribosylation factor 6 OS=Homo sapiens GN=ARF6 PE=1 SV=2 - [ARF6_HUMAN]	21098	22330.5	15127.4	20997.5	20782.7	21336.3	18713.9	16741.2	20458	13093.3	12487.6	18086.9	20027.4	18858	15109.3	17875.4	20526.2	26957.5	16997.2	16516	18469.8	13258.3	14783.5	23466.4	2.03115e-15	0.905116	1	0.98404	-0.28906	-0.0277563	-0.233493	0.0432957	0	0.00698745
Q9UMX0	8	2	435.18	Ubiquilin-1 OS=Homo sapiens GN=UBQLN1 PE=1 SV=2 - [UBQL1_HUMAN]	26796.4	30125.9	20398.8	10624.4	13160	28771.3	16408.6	17493.1	11778	7653.74	6764.8	15052	19215.9	18243.5	16124.8	6507.94	8024.25	20893.7	14073.8	14148.5	12326.1	4333.95	8230.5	12745	0.0421861	0.725762	0.97164	0.313931	-0.789296	-0.545104	-0.979717	0.139206	0.0124945	0.503165
P00374	2	2	120.71	Dihydrofolate reductase OS=Homo sapiens GN=DHFR PE=1 SV=2 - [DYR_HUMAN]	57675.7	59803.1	47440.4	45518	60457.5	61130.7	39216.7	39047.7	37631.8	26799.3	25345.4	44421	43253.2	38996	39832.2	23515.2	32104.8	48267.8	30578.4	31031.1	28353.8	22517.3	32426.3	36098.3	5.35246e-22	0.000491784	0.00477475	5.49453e-07	-0.644089	-0.555168	-0.875262	3.30823	2.32105	6.26007
Q9Y2K7	3	2	165.51	Lysine-specific demethylase 2A OS=Homo sapiens GN=KDM2A PE=1 SV=3 - [KDM2A_HUMAN]	12798.8	5658.93	11057.8	7467.24	4753.2	14808.4	20994.8	27445.6	23859.2	25245	18510.8	18601	14480	14404.6	14670.2	38079.5	8997.92	10584.8	22653.3	34351.5	30978.7	19405.2	21716.8	33595.3	1.26601e-11	0.000605165	0.31515	1.48102e-05	1.25183	0.839996	1.52477	3.21813	0.501483	4.82944
Q9GZS1	2	2	120.24	DNA-directed RNA polymerase I subunit RPA49 OS=Homo sapiens GN=POLR1E PE=1 SV=2 - [RPA49_HUMAN]	10284.1	18384.9	7578.14	10788.8	7058.92	15851.8	18724.7	23749.8	17511	20100.9	12974.9	22720	13493.9	18900.6	9830.03	13570.2	12042.2	17476.6	20062.3	25172.3	22194.4	11900.1	13409.7	23747.7	0.00843809	0.217498	0.997581	0.255108	0.727075	0.286519	0.735837	0.662546	0.00105163	0.593276
Q9UM00	2	2	87.85	Transmembrane and coiled-coil domain-containing protein 1 OS=Homo sapiens GN=TMCO1 PE=1 SV=1 - [TMCO1_HUMAN]	9652.71	6514.53	5489.69	16965.2	11547.5	5117.72	18806.9	15384.2	23676.5	45142.3	30235.9	26827	13761	19941.5	11316.3	27677.9	26000.5	9637.29	27873.6	39747.1	23412.9	43402.8	37036.5	22752	1.08618e-08	4.23145e-05	0.0694834	3.16412e-07	1.53371	0.970473	1.81271	4.37351	1.15812	6.49975
Q3SXM5	2	2	58.93	Inactive hydroxysteroid dehydrogenase-like protein 1 OS=Homo sapiens GN=HSDL1 PE=1 SV=3 - [HSDL1_HUMAN]	3118.13	1564.09	3429.24	4510.48	4491.37	2945.91	4302.48	3834.77	5988.32	8436.78	7394.35	5559.82	2603.87	3014.95	3810.47	4480.66	3577.65	4167.02	5793.8	4911.45	3822.55	7544.91	6319.63	3594.75	3.6403e-09	0.161902	1	0.463533	0.824224	0.110409	0.673224	0.790748	2.8918e-08	0.333919
Q6RFH5	2	2	170.19	WD repeat-containing protein 74 OS=Homo sapiens GN=WDR74 PE=1 SV=1 - [WDR74_HUMAN]	5557.02	7273.17	4687.25	13841.5	7209.2	13023.9	16686	12519.2	44737	21984.3	35076.7	50544	20139.3	16649.1	9866.54	7799.72	20882	22496.6	29692.8	36941.3	29420.5	41250.1	15769.2	45661.6	2.6119e-07	0.00448095	0.668686	0.000527305	1.81512	0.923176	1.94563	2.34863	0.174778	3.27794
Q7Z460	4	2	171.41	CLIP-associating protein 1 OS=Homo sapiens GN=CLASP1 PE=1 SV=1 - [CLAP1_HUMAN]	6836	8561.25	5660.18	6847.97	13021.4	10364.4	3941.79	4160.67	2430.59	5314.36	6061.19	4950.18	2669.94	1972.02	2862.43	3348.85	3736.08	6497.49	1276.37	2226.54	4567.49	2465.27	3755.19	2956.58	4.6709e-12	0.21365	0.00514252	0.000130837	-0.933316	-1.28237	-1.57233	0.670296	2.28882	3.88327
Q8N766	2	2	119.18	ER membrane protein complex subunit 1 OS=Homo sapiens GN=EMC1 PE=1 SV=1 - [EMC1_HUMAN]	8439.42	6575.86	6782.89	13181.6	10742	12038.9	10143	12506.3	13303.4	17032.8	9492.14	9094.17	10559.8	9846.1	12853.1	17665.6	15219.7	12093.8	14425.6	16220	12569.5	17726.1	11438	10256.3	1.66098e-05	0.949276	0.549008	0.259488	0.309302	0.437783	0.516673	0.0226074	0.260422	0.585882
Q9Y281	6	2	383.64	Cofilin-2 OS=Homo sapiens GN=CFL2 PE=1 SV=1 - [COF2_HUMAN]	24803.9	24871.5	23139.4	14459.7	22187.9	24009.6	15671.8	15777.1	13604.7	11327	12310.5	12969.6	20918.1	12345.5	20322.8	13068.7	14080	24303.4	14643.9	11669.9	13334.2	9110.43	17062.2	14723.4	7.02072e-05	0.0494071	0.896835	0.0279783	-0.708823	-0.345619	-0.728687	1.30621	0.0472876	1.55318
O75844	2	2	73.76	CAAX prenyl protease 1 homolog OS=Homo sapiens GN=ZMPSTE24 PE=1 SV=2 - [FACE1_HUMAN]	4403.2	2962.1	1803.35	2155.52	1900.44	2110.41	6369.84	7346.76	6645.75	8407.9	4251.52	5216.08	7271.94	8816.25	3791.61	4058.3	4778.48	3345.57	10650.1	15262.9	5466.12	7457.43	4022.65	4630.05	0.16989	0.197756	0.644906	0.0718664	1.31817	1.06404	1.63077	0.70387	0.190504	1.14347
Q96N66	2	2	99.98	Lysophospholipid acyltransferase 7 OS=Homo sapiens GN=MBOAT7 PE=1 SV=2 - [MBOA7_HUMAN]	1375.85	826.485	569.782	512.114	1290.44	1191.33	4376.37	2210.94	4757.47	3453.88	5196.29	4198.12	4469.41	5563.67	2259.21	4771.32	8327.88	2434	7126.96	14072.1	2861.22	12325.8	5503	3227.71	0.083397	0.922112	0.886578	0.568124	2.06895	2.27076	2.96802	0.0352162	0.0522829	0.245557
P07919	2	2	91.87	Cytochrome b-c1 complex subunit 6, mitochondrial OS=Homo sapiens GN=UQCRH PE=1 SV=2 - [QCR6_HUMAN]	31350.5	36863.2	19001.2	73362.5	41453.7	19527.6	51237.5	59953	59675.8	99922.2	97402.8	80668.5	48108.4	67053.7	27345.3	89997.6	86782.5	40641.3	74406.5	89720.8	52970.9	113183	90676.1	79063.8	9.26068e-12	0.000745035	0.160091	4.31615e-05	1.01858	0.700022	1.1743	3.12782	0.795633	4.3649
P11908	3	2	134.36	Ribose-phosphate pyrophosphokinase 2 OS=Homo sapiens GN=PRPS2 PE=1 SV=2 - [PRPS2_HUMAN]	34882.5	37702.2	38176	9665.49	17274.8	54622.8	25555.3	30953.3	30254.5	11357.9	14066.4	32391.6	26423.8	36696.9	32987.2	12926.3	13139.2	39298.3	21714.2	26036.9	25797.8	12541.8	21728.3	32617.3	0.131712	0.999979	1	0.999987	-0.41168	-0.252257	-0.453622	9.06409e-06	2.47844e-09	5.4515e-06
O75608	2	2	119.56	Acyl-protein thioesterase 1 OS=Homo sapiens GN=LYPLA1 PE=1 SV=1 - [LYPA1_HUMAN]	37717.2	52698.9	24627	40622.3	46989	36321.5	22515.9	26957	17911.9	28117.9	26466.3	23035.4	38628.2	26042.3	30648.2	29872.1	37240	34495.6	23774.6	23600.7	23746.8	25483.5	28266.1	24240.7	2.02122e-14	0.0015223	0.964746	0.00547796	-0.720768	-0.279208	-0.680463	2.8175	0.0155869	2.26138
P62256	2	2	101.87	Ubiquitin-conjugating enzyme E2 H OS=Homo sapiens GN=UBE2H PE=1 SV=1 - [UBE2H_HUMAN]	40328.3	53380.8	40748.6	36879.1	42615.5	61946	38737.7	40478.4	30628.2	18936.2	29209.5	40338.8	45801.4	45479.7	37519.4	24968.9	41913.7	60215.7	34526	31724	34420	28709.9	41847.1	38583	4.28885e-06	0.384366	0.999999	0.821781	-0.476242	-0.108564	-0.395053	0.415255	3.16832e-07	0.0852438
Q02818	2	2	92.16	Nucleobindin-1 OS=Homo sapiens GN=NUCB1 PE=1 SV=4 - [NUCB1_HUMAN]	3365.52	11062.8	3310.83	11378.4	9667.72	8423.07	2892.79	3305.48	6262.96	4430.98	4875.64	5755	8399.48	8420.06	4625.91	3039.67	6257.34	8608.96	3576.42	3414.51	1906.92	7954.84	5575.19	6593.69	0.00108876	0.998027	1	0.997126	-0.778411	-0.262626	-0.701915	0.000857571	3.76965e-12	0.00125004
Q9NVN8	2	2	102.09	Guanine nucleotide-binding protein-like 3-like protein OS=Homo sapiens GN=GNL3L PE=1 SV=1 - [GNL3L_HUMAN]	17752.9	18391.3	19675.4	14827	15099.9	14530.4	14036.9	12616	9525.15	8159.79	5816.59	9213	8287.62	5822.76	14884.2	8512.13	5717.93	5960.56	7490.51	6426.59	13167.9	5423.78	5865.78	5485.15	1.75525e-13	0.0546345	0.000547145	3.55651e-05	-0.756244	-1.02769	-1.19302	1.26253	3.2619	4.44898
Q96GG9	2	2	130.7	DCN1-like protein 1 OS=Homo sapiens GN=DCUN1D1 PE=1 SV=1 - [DCNL1_HUMAN]	10707.2	11557.9	12641	12456.9	13135	10497.5	18824.4	18545.9	11784.7	4752.78	9882.05	11174.8	15117.7	10358.6	8500.8	15231.9	14944.8	13289.6	19073.4	14576.7	11148.2	10059.8	14331.8	8837.15	0.000124199	1	1	1	0.0784832	0.125416	0.136247	0	8.56728e-11	3.80164e-11
P60903	2	2	79.67	Protein S100-A10 OS=Homo sapiens GN=S100A10 PE=1 SV=2 - [S10AA_HUMAN]	38865.8	34536.6	24336.4	47054.6	38024.4	30078.7	88886.4	98096.4	277462	135088	370748	376385	188735	194309	43131.9	120102	343873	145990	324419	475481	210627	475365	250427	363932	3.96032e-05	0.0101493	0.0700947	5.25586e-05	2.66117	2.283	3.30234	1.99356	1.15431	4.27936
Q5T9A4	5	2	248.03	ATPase family AAA domain-containing protein 3B OS=Homo sapiens GN=ATAD3B PE=1 SV=1 - [ATD3B_HUMAN]	23486.1	8600.12	15008.3	24249.5	13025.3	13417.4	33424.2	32206.1	28514	38395.7	28751.7	31231.8	20088.1	24052.3	19252.2	37385.1	20280.2	20521	34120.3	34038.2	35416.5	25158.4	32049.4	35924.3	0.000830531	0.00124361	0.481557	0.000770227	0.977325	0.533896	1.00834	2.90532	0.317353	3.11338
Q86W42	4	2	137.52	THO complex subunit 6 homolog OS=Homo sapiens GN=THOC6 PE=1 SV=1 - [THOC6_HUMAN]	2345.19	1736.09	1250.8	4672.49	2831.18	2326.52	5603.5	6196.21	9678.48	10873	10067.8	10789.8	4751.84	3162.65	854.749	5545.65	4123.87	3509.93	6961.07	6149.79	8525.05	5926.86	6813.38	10144.9	2.89567e-15	4.20147e-07	0.979993	1.56844e-05	1.81118	0.53365	1.554	6.3766	0.00877722	4.80453
Q5H9R7	2	2	135.65	Serine/threonine-protein phosphatase 6 regulatory subunit 3 OS=Homo sapiens GN=PPP6R3 PE=1 SV=2 - [PP6R3_HUMAN]	12924.3	16007.8	7569.52	6388.05	12102.1	32946.5	7379.58	12784.7	4001.88	7964.83	3787.21	14142.8	6312.48	10271.2	5227.96	1135.87	11249.2	18636.4	5827.51	8122.83	8188.12	4851.1	4541.21	11925.5	0.000202437	0.954926	0.806288	0.870985	-0.812803	-0.73505	-1.01693	0.0200305	0.0935096	0.0599892
P09132	2	2	92.65	Signal recognition particle 19 kDa protein OS=Homo sapiens GN=SRP19 PE=1 SV=3 - [SRP19_HUMAN]	11810.9	19671.7	29275.1	3848.33	9547.17	17289.8	8832.08	16237.9	8514.27	8934.45	7466.63	12389.8	22032.8	11470.4	10834.9	4466.24	4694.58	11939.1	9635.85	11947.5	7129.91	7665.45	9985.02	10889.9	0.74892	0.999994	0.999848	0.999846	-0.5519	-0.482743	-0.675506	2.40536e-06	6.59767e-05	6.68898e-05
Q9P0M6	3	2	145.01	Core histone macro-H2A.2 OS=Homo sapiens GN=H2AFY2 PE=1 SV=3 - [H2AW_HUMAN]	574.174	886.118	389.03	1633.48	890.803	1275.34	2514.14	1784.05	20379.3	14361.8	18767.8	21119.4	13675.3	10922	1407.61	7569.86	11780.9	5052.69	22144.7	29619.4	24818.5	24135.2	6404.2	22530.5	0.000556171	0.191219	0.395406	0.0107532	3.80446	3.15761	4.52053	0.71847	0.402957	1.96846
Q9BQ70	2	2	152.48	Transcription factor 25 OS=Homo sapiens GN=TCF25 PE=1 SV=1 - [TCF25_HUMAN]	26693.8	32757	22098.3	31384.8	30812.7	42777	13126.7	16483.5	7948.34	12576.6	9728.85	13326.4	12127.5	17822.6	20163.5	21286.2	20749.5	28127.3	9690.97	11622.8	14000.5	14366.7	10667.3	16592.2	4.23695e-14	0.000123196	0.525392	0.000467906	-1.34963	-0.633003	-1.27754	3.9094	0.279517	3.32984
O15479	5	2	282.19	Melanoma-associated antigen B2 OS=Homo sapiens GN=MAGEB2 PE=1 SV=3 - [MAGB2_HUMAN]	18925.2	19752.5	12282.5	30730.1	16204.6	14478.2	40125.6	32344.2	37203.6	36618.2	35410.5	35432.3	28008.5	31576	18563	41183.8	32224.2	26282.4	34181.9	37820.8	38351.4	41558.3	41373.9	37524.6	6.39796e-13	2.75437e-09	0.000149578	5.31303e-10	0.950294	0.662268	1.03842	8.55998	3.82513	9.27466
Q9BXY0	2	2	105.01	Protein MAK16 homolog OS=Homo sapiens GN=MAK16 PE=1 SV=2 - [MAK16_HUMAN]	5158.84	2859.42	2293.06	5959.74	4415.84	2269.6	4577.64	3893.45	19892.9	9713.81	21662.1	20401.2	13153.1	13128.4	6012.71	10877.4	11500.6	11300.4	18043.9	20703	16634.2	20467.2	6726.59	18566.5	0.000143578	0.073856	0.0777368	0.00132911	1.80364	1.52296	2.1394	1.13161	1.10937	2.87644
Q99988	2	2	100.8	Growth/differentiation factor 15 OS=Homo sapiens GN=GDF15 PE=1 SV=3 - [GDF15_HUMAN]	1619.12	5959.09	460.611	2373.01	3307.71	3712.59	3228.67	1370.66	2899.47	9610.61	17573.8	10330.2	573.381	844.843	5068.27	2282.86	7650.28	10458.9	4870.69	3978.7	4326.54	14188.6	8238.32	6326.8	0.00612596	0.993848	1	0.962829	1.36861	0.624708	1.26622	0.00268016	1.89828e-12	0.0164509
Q96CS3	2	2	155.66	FAS-associated factor 2 OS=Homo sapiens GN=FAF2 PE=1 SV=2 - [FAF2_HUMAN]	46110.5	43503.9	33014.3	61342.5	45076.2	44956.9	56055.6	68569.9	45593.4	68832.4	44849.3	57988.3	48098.8	49645.6	43909.6	81011.5	38288.4	55391.7	55072.3	67339.2	55333.4	50490	51283.6	65712.9	3.68288e-08	0.470144	0.9871	0.331989	0.31933	0.207304	0.333366	0.327769	0.00563887	0.478877
Q16204	2	2	133.91	Coiled-coil domain-containing protein 6 OS=Homo sapiens GN=CCDC6 PE=1 SV=2 - [CCDC6_HUMAN]	25137.2	34639.2	25361.5	19148.7	23244.9	45317.1	17592.6	27535.1	10957.4	6256.07	9069.9	16150.7	22999.9	23952.4	24199.3	13426.5	13161.5	35673.7	17321.9	19738.6	15742	7703.26	12185.2	23377.2	2.74408e-16	0.00180954	0.962617	0.037544	-0.981137	-0.373606	-0.847379	2.74243	0.0165464	1.42546
Q9NX63	2	2	102.85	Coiled-coil-helix-coiled-coil-helix domain-containing protein 3, mitochondrial OS=Homo sapiens GN=CHCHD3 PE=1 SV=1 - [CHCH3_HUMAN]	1535.76	1633.94	1036.51	5138.54	3012.78	2231.39	3415.46	2144.31	4269.33	12617.2	13313.2	5615.92	2319.04	800.967	797.088	8660.06	8807.28	1164.42	4339.1	3224.08	4070.56	16945.7	4566.74	3612.94	0.00593379	0.580557	1	0.760768	1.5039	0.628181	1.33323	0.236155	0	0.118748
Q9UHD9	5	2	285.01	Ubiquilin-2 OS=Homo sapiens GN=UBQLN2 PE=1 SV=2 - [UBQL2_HUMAN]	9680.2	7662.59	4060.8	839.062	2504	8547.31	6316.99	5050.36	4153.13	656.595	262.568	6044.38	8388.95	5741.96	6470.58	1207.93	1455.14	7304.62	4174.69	6665.41	4777.19	380.354	2518.42	6224.25	0.947577	0.999993	1	1	-0.566361	-0.123183	-0.428397	3.17143e-06	0	1.32297e-10
Q02241	2	2	122.59	Kinesin-like protein KIF23 OS=Homo sapiens GN=KIF23 PE=1 SV=3 - [KIF23_HUMAN]	7124.89	9175.42	4030.45	6596.1	4813.83	10857.5	32846.3	33670.6	28232.3	21864	15873	34646.3	11540.7	24456.5	14091.7	11672.8	10769.5	19484.5	30109.2	29968.3	27580.7	15853.8	20592	35767.5	1.36646e-13	1.10223e-09	0.00270075	2.56343e-09	1.97213	1.11109	1.90805	8.95773	2.56852	8.59118
P24385	2	2	97.17	G1/S-specific cyclin-D1 OS=Homo sapiens GN=CCND1 PE=1 SV=1 - [CCND1_HUMAN]	1480.32	1718.67	1764.46	939.304	1764.91	2299.16	10588.3	14994.5	1800.45	4720.61	2812.64	8299.34	5192.24	5521.48	5217.02	3208.98	3111.99	10927.3	5834.34	13894.1	10588.6	2865.76	4314.94	13371	4.60565e-06	0.888956	0.945993	0.662545	2.11635	1.73507	2.35157	0.0511196	0.024112	0.178784
Q9P035	2	2	148.67	Very-long-chain (3R)-3-hydroxyacyl-[acyl-carrier protein] dehydratase 3 OS=Homo sapiens GN=PTPLAD1 PE=1 SV=2 - [HACD3_HUMAN]	33476.8	22289.3	19261.4	35182.2	35336.5	11733.2	38890.8	42559.4	42620	58578.8	50501	47035.6	48733.7	58327.6	36989.2	47572.9	48933.2	42509.8	66841.9	96770.7	28051.3	64481.8	40418.8	23638.2	0.000241809	0.062789	0.0540644	0.0447854	0.833054	0.847812	1.02566	1.20212	1.26709	1.34886
Q92542	2	2	87.53	Nicastrin OS=Homo sapiens GN=NCSTN PE=1 SV=2 - [NICA_HUMAN]	4149.2	4120.29	3710.53	8896.17	7345.38	5145.48	7308.42	7430.73	5565.11	10133.6	9503.29	7636.62	5563.84	5179.58	6087.94	9898.49	7858.17	6756.59	7032.55	9645.77	5772.7	9508.53	7932.37	7267.75	1.38958e-16	0.498214	0.978876	0.525677	0.511863	0.309276	0.499129	0.302584	0.00927237	0.279281
Q99986	2	2	82.62	Serine/threonine-protein kinase VRK1 OS=Homo sapiens GN=VRK1 PE=1 SV=1 - [VRK1_HUMAN]	6359.08	12437.4	3045.67	10034.4	4653.31	7435.53	17584.3	24202.3	13499	8131.7	8970.46	17412.2	11911.4	16078	6603.85	8366.69	7326.38	16308.7	14523.9	20229	14166	6921.4	10124.1	21001.1	1.61031e-05	0.268532	0.946062	0.334327	1.03035	0.599043	0.984075	0.571004	0.0240802	0.475828
Q9H0H5	2	2	98.35	Rac GTPase-activating protein 1 OS=Homo sapiens GN=RACGAP1 PE=1 SV=1 - [RGAP1_HUMAN]	7717.69	7657.28	4785.85	15481	10489.6	10336.5	30907.5	35568.7	26095.4	53363	37904	33601	12770.2	20123	13152.4	24477.7	18055.2	15806.1	29699.9	24329.1	33388.9	34484.5	32090.3	30516.8	6.51015e-21	4.36041e-10	0.00298105	4.94464e-10	1.94511	0.886406	1.70819	9.36047	2.52563	9.30586
O75306	2	2	126.39	NADH dehydrogenase [ubiquinone] iron-sulfur protein 2, mitochondrial OS=Homo sapiens GN=NDUFS2 PE=1 SV=2 - [NDUS2_HUMAN]	4972.74	2869.67	4074.48	3943.79	5216.41	4727.58	6483.19	8075.62	10784.6	3172.65	8610.9	13238.9	7750.71	12069.8	4240.77	7271.11	9499.83	7829.8	10911.8	13070	7049.36	10579.5	5224.4	9788.69	3.09552e-09	0.325358	0.30242	0.0520602	0.964815	0.915164	1.13378	0.487639	0.519389	1.28349
P48651	2	2	124.62	Phosphatidylserine synthase 1 OS=Homo sapiens GN=PTDSS1 PE=1 SV=1 - [PTSS1_HUMAN]	911.593	1121.26	1220.5	2174.07	3739.23	2912.85	6067.43	2256.44	5386.02	5650.57	4037.87	6771.23	1338.36	4858.7	2110.61	5032.15	10067.9	4141.72	4345.23	7231.35	5329.79	8187.78	3779.28	5513.99	0.000568556	0.132829	0.550866	0.0340109	1.32053	1.18946	1.50932	0.876706	0.258954	1.46838
Q14241	2	2	81.21	Transcription elongation factor B polypeptide 3 OS=Homo sapiens GN=TCEB3 PE=1 SV=2 - [ELOA1_HUMAN]	3030.64	4711.08	4542.57	2753.68	1730.61	3776.65	3643.27	2953.9	4427.15	7412.18	2027.49	2733.19	4785.46	4935.88	5891.14	3047.98	4716.39	4116.98	3398.73	5906.48	4481.94	1837.71	4531.45	6173.66	0.0294901	1	0.997481	0.999973	0.175146	0.420304	0.357903	2.41902e-12	0.00109541	1.16379e-05
P82675	2	2	126.22	28S ribosomal protein S5, mitochondrial OS=Homo sapiens GN=MRPS5 PE=1 SV=2 - [RT05_HUMAN]	10325.4	5794.78	6779.02	7252.1	4329.1	12337.3	10033.7	12488.4	11940.3	6746.96	14529.8	15323.4	11533	17288.4	10261.5	11707.4	7001.2	12927.5	13429	16954.1	11952.2	6760.8	11050.4	16843.6	0.428465	0.86235	0.874864	0.671266	0.602035	0.595044	0.717617	0.0643163	0.0580596	0.173105
Q7Z2W4	2	2	181.32	Zinc finger CCCH-type antiviral protein 1 OS=Homo sapiens GN=ZC3HAV1 PE=1 SV=3 - [ZCCHV_HUMAN]	9709.48	8006.45	3776.53	7997.24	19512.6	16789.3	8126	11069.2	7480.99	4554.46	3088.85	9758.42	10830.9	9728.84	5582.48	6423.36	5839.57	9801.97	5998.34	6786.93	8829.55	5445.11	7502.48	8535.86	5.17725e-09	0.931328	0.999735	0.983107	-0.577847	-0.448656	-0.610273	0.0308975	0.000115033	0.0073993
O43663	2	2	107.43	Protein regulator of cytokinesis 1 OS=Homo sapiens GN=PRC1 PE=1 SV=2 - [PRC1_HUMAN]	12831.5	16154.8	20438	19256.6	16839.5	15022.4	35279.3	33648.8	31467.5	55957.2	36060.2	28306.9	17705.8	19090.7	19184.9	20888.8	15085	12305.7	33561.8	29632.4	23295.5	33679.6	20077.5	23715.6	6.64297e-14	6.30971e-07	1	0.0119511	1.13441	0.0523903	0.705558	6.19999	0	1.92259
Q96S52	2	2	114.44	GPI transamidase component PIG-S OS=Homo sapiens GN=PIGS PE=1 SV=3 - [PIGS_HUMAN]	8507.93	5748.79	6955.7	9863.61	6542.85	5812.3	6034.16	8244.9	9243.1	8337.65	9327.48	7686.83	7637.38	9677.78	9070.43	12421	9618.93	6360.58	8052.62	9810	10132.9	11632.2	6966.8	6832.36	0.00338325	0.999994	0.988599	0.996399	0.170339	0.33508	0.298833	2.65332e-06	0.00497981	0.00156676
Q8WX93	2	2	123.97	Palladin OS=Homo sapiens GN=PALLD PE=1 SV=3 - [PALLD_HUMAN]	37186.7	48175.9	34074.7	35794.6	42198.7	55345	32879	37014.9	25661.9	26819.9	25039.4	30825.5	29902.1	28887.8	27505.6	28090.5	34882.2	42918.4	24420.1	32180.3	29577.9	29162.9	28061.7	31716.5	3.20624e-17	0.149877	0.53215	0.115557	-0.504031	-0.395349	-0.529518	0.824264	0.273966	0.937203
Q96G03	2	2	68.38	Phosphoglucomutase-2 OS=Homo sapiens GN=PGM2 PE=1 SV=4 - [PGM2_HUMAN]	19368	21655.1	14871.4	13189.1	15613.3	26741.7	13608.7	15651.8	7629.96	6831.45	11974	13273.5	15737.1	16086.6	16516	8298.66	16966.8	18390.9	9861.22	11184	13032.4	7577.4	14620.6	19377.8	0.0586668	0.67954	0.999982	0.91564	-0.692222	-0.276606	-0.558773	0.167785	7.76453e-06	0.0382753
Q8IXH7	2	2	125.28	Negative elongation factor C/D OS=Homo sapiens GN=NELFCD PE=1 SV=2 - [NELFD_HUMAN]	8765.8	8250.51	6707.1	12994.9	14016.1	14650.5	11966.6	10128	7112.36	10519.1	11224.8	9913.93	7381.4	6435.58	7876.65	7025.93	8515.01	6941.81	6740.77	5550.06	6785.45	9250.42	9947.92	11814.1	0.00171553	1	0.920865	0.996309	-0.103349	-0.565683	-0.384472	0	0.0358038	0.00160614
Q9Y263	2	2	141.81	Phospholipase A-2-activating protein OS=Homo sapiens GN=PLAA PE=1 SV=2 - [PLAP_HUMAN]	28635.4	27516.2	27731.8	28096.2	20717.9	25623.6	35547.2	47230.2	41537.4	26999.9	24315.8	42650.1	42885.7	32329.8	28685.4	26020.2	21635.7	32566.9	38873.2	50597.8	36624.1	24646.6	20056.7	36766.6	0.454881	0.795443	0.999956	0.970955	0.463331	0.217821	0.390709	0.0993909	1.92922e-05	0.0128011
Q9HCY8	2	2	180.15	Protein S100-A14 OS=Homo sapiens GN=S100A14 PE=1 SV=1 - [S10AE_HUMAN]	7001.72	5457.04	5291.36	15432	7998.6	8022.19	7178.57	6016.45	10086.9	10404.6	14652.9	15998.7	18618.5	19320.8	6572.59	28192.5	36583.4	20148.3	12779.3	21269.3	10416.7	23674.8	13568	17881.4	4.57229e-10	0.99915	0.017489	0.160422	0.38693	1.39542	1.01725	0.00036937	1.75723	0.794736
Q96HS1	3	2	182.04	Serine/threonine-protein phosphatase PGAM5, mitochondrial OS=Homo sapiens GN=PGAM5 PE=1 SV=2 - [PGAM5_HUMAN]	14635.9	9089.72	4167.87	17112.1	11265.2	8436.1	13903.5	16911.4	16897.3	31684.2	16731.7	15113.2	12151.1	20570.9	12245.5	24531.4	13640.5	9458.54	18016.5	19633.6	17877.9	19913.8	14204.2	18312.9	1.00354e-07	0.00877138	0.3549	0.00783227	0.781699	0.51706	0.738488	2.05693	0.449895	2.10611
Q9HB07	2	2	183.09	UPF0160 protein MYG1, mitochondrial OS=Homo sapiens GN=C12orf10 PE=1 SV=2 - [MYG1_HUMAN]	10329.7	22902.5	26038.3	26761.4	32382.5	22032.1	16571.5	25258.6	16935.6	13538.4	21143.3	28329.3	11299.8	23956.9	19533.9	17061.2	12331.1	31462.5	10670.5	19321.9	15306.8	20934.8	32821.1	16921.5	4.74986e-05	1	0.99994	0.999966	-0.205784	-0.280313	-0.27619	9.88921e-09	2.58559e-05	1.4894e-05
P35659	3	2	131.19	Protein DEK OS=Homo sapiens GN=DEK PE=1 SV=1 - [DEK_HUMAN]	8310.55	4396.35	1841.93	16503.8	7534.24	3600.36	10918.9	8609.29	10210.2	13838.3	18581.2	9710.59	5766.83	7093.81	3135.72	16202.1	9060.17	6140.32	6911.15	8773.76	10562.9	15652	10619	8441.52	9.40888e-07	0.945393	1	0.995542	0.768555	0.168051	0.531064	0.0243876	4.00198e-09	0.00194027
P63313	2	2	113.88	Thymosin beta-10 OS=Homo sapiens GN=TMSB10 PE=1 SV=2 - [TYB10_HUMAN]	24902.7	7139.1	44789.1	169976	170691	35163.7	14051.3	7966.25	18925.9	77649.5	83502.7	14471	14191.7	8253.48	26900	88435.8	108702	18225.5	12955.5	7294.89	25418	93057.7	69221.1	12480.8	0.950121	0.999781	0.999998	0.999758	-1.06362	-0.77403	-1.03813	9.49928e-05	1.01244e-06	0.000105178
P33240	4	2	182.56	Cleavage stimulation factor subunit 2 OS=Homo sapiens GN=CSTF2 PE=1 SV=1 - [CSTF2_HUMAN]	34237.8	29692	29603.6	27371.3	23067	18927.1	31431.2	35667.1	29220.7	36174.7	23936.9	19145.2	30879.2	23396.9	29661.2	38358.6	21180.3	15260.8	29282.4	34353.6	32764.3	27140.4	24894.6	19036.6	0.179427	1	1	1	0.108118	-0.0373359	0.0399439	5.21362e-10	3.29067e-12	0
P21291	2	2	101.96	Cysteine and glycine-rich protein 1 OS=Homo sapiens GN=CSRP1 PE=1 SV=3 - [CSRP1_HUMAN]	25624.8	23954.9	19999.3	15951.4	22744.4	31810.4	10609.2	9495.09	7205.28	8722.34	8555.91	12332.4	13999.3	14264.5	17110.3	10734	12911.2	22626.6	8322.38	13621.6	12245.7	7945.17	12583.2	11653.4	3.02679e-18	1.91311e-07	0.121007	2.63598e-05	-1.29929	-0.612163	-1.07767	6.71826	0.917191	4.57906
Q9UBX3	2	2	127.39	Mitochondrial dicarboxylate carrier OS=Homo sapiens GN=SLC25A10 PE=1 SV=2 - [DIC_HUMAN]	773.932	1462.74	1034.7	2547.72	1747.6	7.55815	3717.48	3723.99	8345.29	11252.4	10637.5	7736.45	3769.3	7363.37	1599.86	5551.8	7940.54	842.867	12888.4	8987.27	1927.07	12125.6	6343.6	193.078	0.0200884	0.190091	0.743766	0.644503	2.58393	1.8374	2.4871	0.721039	0.128564	0.190775
Q16537	3	2	167.4	Serine/threonine-protein phosphatase 2A 56 kDa regulatory subunit epsilon isoform OS=Homo sapiens GN=PPP2R5E PE=1 SV=1 - [2A5E_HUMAN]	15115.1	14949.5	6524.09	12437.3	13676.8	18601.3	9408.7	19558.9	8322.09	8652.53	7519.52	9343.72	12849.2	9495.32	10603.5	12318.6	9198.69	12470.8	7674.46	10530.9	10605.3	9161.65	12526.5	12557	4.33885e-06	0.92783	0.999805	0.98767	-0.372438	-0.280543	-0.3667	0.0325317	8.46752e-05	0.00538831
Q9Y6C9	2	2	132.8	Mitochondrial carrier homolog 2 OS=Homo sapiens GN=MTCH2 PE=1 SV=1 - [MTCH2_HUMAN]	85.2706	211.36	243.096	31.959	103.94	111.796	1002.93	1344.3	4195.6	1346.71	4918.97	7500.87	2935.81	8041.25	281.177	2549.15	4406.23	283.903	6534.01	7024.24	482.078	9253.22	461.565	4948.83	0.0162978	0.519976	0.761589	0.47127	4.68887	4.55405	5.18797	0.284016	0.11828	0.32673
Q96A49	2	2	154.34	Synapse-associated protein 1 OS=Homo sapiens GN=SYAP1 PE=1 SV=1 - [SYAP1_HUMAN]	23556.7	21421.8	20670.9	25934.1	30958.5	33131.5	14229.8	18982.4	9712.28	15248.6	10481.9	12021.4	17379.4	15310.5	15406.8	14577	17665.2	21286.6	10418.7	14598.6	13138.9	13624.8	18725.3	15088.9	2.46451e-19	1.45782e-08	0.00176131	4.93489e-07	-0.948305	-0.615261	-0.862921	7.8363	2.75416	6.30672
Q12765	2	2	109.93	Secernin-1 OS=Homo sapiens GN=SCRN1 PE=1 SV=2 - [SCRN1_HUMAN]	41861.1	52553.6	33542.8	14645.3	22450.2	66018.9	39319.3	36716.3	31234.3	22586.7	13467.9	37190.2	31376.6	39550.5	34030.8	19052.6	19349.2	49832.6	33838.8	37988	28013.8	17915.2	26270.8	38688	0.997573	0.999999	1	1	-0.356226	-0.258304	-0.338751	4.04024e-07	3.07058e-10	8.71018e-09
O00762	2	2	129.75	Ubiquitin-conjugating enzyme E2 C OS=Homo sapiens GN=UBE2C PE=1 SV=1 - [UBE2C_HUMAN]	77685.2	85443.2	72463.7	89179.8	84967.8	94671.8	76439.9	65856.2	63090.7	66492.3	65071	81266.3	76670.7	82769.4	87214.6	65119.4	80473	99088.1	68955.1	69671.8	71252	78158.3	81870.9	79088.9	5.80967e-14	0.96421	1	0.999874	-0.270352	-0.0378942	-0.167896	0.0158286	0	5.46515e-05
Q969G3	2	2	148.62	SWI/SNF-related matrix-associated actin-dependent regulator of chromatin subfamily E member 1 OS=Homo sapiens GN=SMARCE1 PE=1 SV=2 - [SMCE1_HUMAN]	27263.6	14016.8	14696	23132.6	18651.2	18351.3	46597	41818.8	30750.4	43074.2	32548.2	39847.1	37658.4	20632.2	17772.6	37194.7	17908	22720.3	28408.2	30386	37260.5	29192.6	32594.9	39846.2	6.82594e-15	2.0863e-08	0.465815	3.8944e-05	1.01491	0.406352	0.767717	7.68062	0.331787	4.40956
O96000	2	2	76.28	NADH dehydrogenase [ubiquinone] 1 beta subcomplex subunit 10 OS=Homo sapiens GN=NDUFB10 PE=1 SV=3 - [NDUBA_HUMAN]	1183.07	1135.63	903.083	1846.86	924.4	344.579	2104.26	1624.49	6440.3	2009.28	5638.28	5243.25	3772.87	7870.64	1711.75	4728.83	7662.96	2793.63	6246.88	7418.51	3419.3	7218.01	1364.16	3017.71	1.35013e-08	0.0392464	0.00441588	0.00514448	1.86337	2.17101	2.17826	1.4062	2.35498	2.28866
Q8NBF2	3	2	88.34	NHL repeat-containing protein 2 OS=Homo sapiens GN=NHLRC2 PE=1 SV=1 - [NHLC2_HUMAN]	17724.5	21147.9	11225.3	6300.7	10781.3	18775.1	9020.9	11509.3	8756.32	2160.57	4508.8	10623.4	7251.02	8128.31	7556.7	2509.61	5612.07	14761.9	7312.67	11536.3	6743.62	2124.73	4958.51	11381.8	0.0250636	0.697353	0.691185	0.567846	-0.88389	-0.907613	-0.964184	0.156548	0.160406	0.24577
Q15654	2	2	103.95	Thyroid receptor-interacting protein 6 OS=Homo sapiens GN=TRIP6 PE=1 SV=3 - [TRIP6_HUMAN]	39029.3	56985.7	24299	23488.3	27465.1	54300.4	30658.6	33090.5	12962.2	18969.1	11247.1	32169.6	29964.6	38627.5	19238.5	19948.8	18628.1	45165.2	32070.2	21761	24734.7	14175.1	23853	34055.3	0.0225488	0.328331	0.988874	0.821296	-0.69747	-0.394742	-0.582368	0.483689	0.00485883	0.0855003
Q9C037	2	2	36.94	Tripartite motif-containing protein 4 OS=Homo sapiens GN=TRIM4 PE=2 SV=2 - [TRIM4_HUMAN]	1.45751e+06	1.90183e+06	1.55622e+06	1.6997e+06	1.52136e+06	2.57465e+06	1.28616e+06	971721	978448	867217	1.12102e+06	1.20511e+06	1.22736e+06	1.09738e+06	1.09444e+06	903654	1.36086e+06	1.43379e+06	993244	838366	1.10312e+06	1.2316e+06	1.22195e+06	1.17438e+06	4.83897e-09	0.00031839	0.0124154	0.00072395	-0.736314	-0.589691	-0.706777	3.49704	1.90604	3.14029
Q5BKZ1	2	2	86.43	DBIRD complex subunit ZNF326 OS=Homo sapiens GN=ZNF326 PE=1 SV=2 - [ZN326_HUMAN]	18233.6	12449.3	5623.17	25269.7	18798.2	16303.4	28616.3	27796.6	23409.2	33208.1	26072	25862.4	19926.2	20760.9	14379.3	30187.6	17180.8	17852.8	21937.3	23542.9	25836.2	20911.1	25906.7	26204.8	7.77291e-07	0.0011226	0.769261	0.0338818	0.770906	0.315237	0.57821	2.94977	0.113926	1.47003
Q3LXA3	2	2	155.85	Bifunctional ATP-dependent dihydroxyacetone kinase/FAD-AMP lyase (cyclizing) OS=Homo sapiens GN=DAK PE=1 SV=2 - [DHAK_HUMAN]	20339.9	24867.3	23736.8	28301.6	31533.4	33680.3	9317.53	12671.1	8035.14	10376.5	8997.27	9903.67	15495.4	15121	18254.6	13776	18557.2	24717.4	9982.25	12644.6	10008.5	12292.6	17344.1	14336.2	1.82879e-22	4.63425e-10	0.0338925	5.90871e-07	-1.45394	-0.617081	-1.08451	9.33402	1.4699	6.22851
P62633	2	2	51.07	Cellular nucleic acid-binding protein OS=Homo sapiens GN=CNBP PE=1 SV=1 - [CNBP_HUMAN]	25017	18905.3	24613.3	7691.74	15337.3	34574.9	14668.1	9043.52	19791.2	3360.32	6780.7	16415.7	19402.6	18509.1	21475.8	8592.92	22836.6	29734.4	14667.9	18601.1	22602.9	6650.5	5799.76	22228.7	0.0147628	0.589212	1	0.99554	-0.848367	-0.0653703	-0.478221	0.229729	0	0.00194117
Q7Z739	2	2	139.36	YTH domain family protein 3 OS=Homo sapiens GN=YTHDF3 PE=1 SV=1 - [YTHD3_HUMAN]	19265.4	26606.1	15139.9	17656.1	16250.8	33098	14514	19129	15066.6	15609.5	10677.6	24542.1	16881.4	18605.9	12394.9	15289.6	9391.48	26736.5	18421.9	16184	12684.1	11732.2	19347.5	20044.9	4.93428e-12	0.976757	0.948259	0.977591	-0.362997	-0.366466	-0.379385	0.0102134	0.0230729	0.00984297
Q9Y3A5	2	2	139.1	Ribosome maturation protein SBDS OS=Homo sapiens GN=SBDS PE=1 SV=4 - [SBDS_HUMAN]	35321.5	43697.5	39531.3	49403.9	53012.1	67294.1	35679.9	31598.4	38000.3	30916.5	37676.9	45000.9	42197.5	38040.3	43490.7	31871.4	49330.8	64894.2	34753	30336.4	37405.3	34415.3	53142.3	51565.5	9.13662e-06	0.292495	0.999999	0.886818	-0.39728	-0.0953494	-0.254646	0.533882	6.2716e-07	0.0521656
O14965	2	2	98.36	Aurora kinase A OS=Homo sapiens GN=AURKA PE=1 SV=2 - [AURKA_HUMAN]	4905	2330.63	5628.05	16755.5	10282.5	7322.13	17108	17452.9	12529.1	32655.8	23917.6	18893.1	9436.82	12837.4	15715.8	31682.2	18962.3	12090.9	14850.6	8424.83	17725.1	29212.9	24554.9	19328.2	5.82179e-10	0.0026127	0.0582272	0.0106609	1.37586	1.09284	1.27267	2.58291	1.23487	1.9722
Q9Y2V2	2	2	99.64	Calcium-regulated heat stable protein 1 OS=Homo sapiens GN=CARHSP1 PE=1 SV=2 - [CHSP1_HUMAN]	24444	26861.8	29093.5	20246.1	24964.4	26376.4	18272.1	17676.5	15419.2	12648.4	15103.4	16995.5	15935.3	17351.6	20310.6	12501.2	15272.5	24366.9	17350.9	13893.4	18699.4	12106	19953.4	17761.5	0.0060036	0.0847153	0.325933	0.147956	-0.661106	-0.523446	-0.607341	1.07204	0.486872	0.829869
Q9H2U2	3	2	159.52	Inorganic pyrophosphatase 2, mitochondrial OS=Homo sapiens GN=PPA2 PE=1 SV=2 - [IPYR2_HUMAN]	19383.6	26008	24586	26089.4	26531	37007.2	17386.7	22419.5	14439.6	11248.2	9062.74	9447.9	14473.5	13293.8	17089.5	18877	9234.5	21830.8	10709.1	27829.6	13209.7	6314.61	12421.5	17469.4	3.50497e-09	0.00143605	0.0367254	0.00140636	-0.925966	-0.751563	-0.859687	2.84283	1.43503	2.8519
Q96M27	2	2	146.44	Protein PRRC1 OS=Homo sapiens GN=PRRC1 PE=1 SV=1 - [PRRC1_HUMAN]	18392.6	22993.4	20922.7	23062.9	24173.2	28883.2	18153.1	20117.6	14211.8	12832.6	12680.3	17572.9	17807.9	17217.6	20853.6	14136.2	16731.5	24636.1	15739.3	16858.2	16283.3	13362.2	22871.6	17434.7	0.450763	0.493844	0.987076	0.829656	-0.53453	-0.313607	-0.432818	0.30641	0.00564958	0.0811019
Q9NVH2	2	2	95.47	Integrator complex subunit 7 OS=Homo sapiens GN=INTS7 PE=1 SV=1 - [INT7_HUMAN]	4089.62	6024.33	5685.57	9982.7	9261.71	7427.21	7235.11	8178.8	8338.3	15467.7	16155.4	11476.8	7194.69	7996.92	7319.03	5898.46	13292.4	9374.4	7106.14	5403.29	8317.36	16599.3	9284.6	12040	0.0497292	0.681247	0.999917	0.983481	0.654492	0.266162	0.468121	0.166695	3.61457e-05	0.00723386
Q9BZX2	2	2	98.7	Uridine-cytidine kinase 2 OS=Homo sapiens GN=UCK2 PE=1 SV=1 - [UCK2_HUMAN]	28750.1	23510.2	23694.7	25294.9	35725.8	46730.9	23263.6	21020.7	14600.3	10086	18468.9	17781.9	6112.82	8302.84	15397.6	12272.4	10027.9	22616	20074.6	10991.2	10802.2	14317.5	12692.4	18906.9	2.0488e-23	0.0222	3.94136e-07	0.000273246	-0.803974	-1.29765	-1.06536	1.65365	6.40435	3.56345
Q96LD4	2	2	71.53	Tripartite motif-containing protein 47 OS=Homo sapiens GN=TRIM47 PE=1 SV=2 - [TRI47_HUMAN]	9885.92	15871.6	9464.12	6875.23	34004.6	9334.29	5149.34	10213.2	6897.6	12220.1	11985.2	7980.14	10479.2	7082.19	9449.17	6482.33	9500.82	20358.4	12141	12654.6	5243.79	11693.1	4224.22	12744.6	0.00517363	0.997983	0.999995	0.999345	-0.650024	-0.431448	-0.541447	0.000877008	2.28484e-06	0.000284406
P53602	2	2	135.59	Diphosphomevalonate decarboxylase OS=Homo sapiens GN=MVD PE=1 SV=1 - [MVD1_HUMAN]	21763.5	19380.5	17510.8	19755.5	26086.9	26615.9	13335.2	11797.4	10626.4	12638.8	13004.2	13011.3	16434.1	16331.7	17523.2	14796.5	26141.3	21272.4	11587.4	12662.6	14310.9	18127	14989	19812.2	1.26652e-09	2.79507e-05	0.975034	0.0367091	-0.817177	-0.220896	-0.519138	4.55361	0.0109801	1.43523
Q9NVS9	2	2	110.9	Pyridoxine-5'-phosphate oxidase OS=Homo sapiens GN=PNPO PE=1 SV=1 - [PNPO_HUMAN]	51538.7	52621.5	67087.9	40742.4	41690.2	88693.6	37677.3	26550.8	29928.6	19518.6	22466.4	35991.7	43244.8	39191.8	69154.5	23874.7	36622.3	65189.7	31703.4	35313.9	47919.6	21606.4	39502.3	43015.2	3.10328e-08	0.00143548	0.975692	0.214182	-0.992046	-0.304242	-0.644243	2.843	0.0106875	0.669216
Q9Y3D7	2	2	182.65	Mitochondrial import inner membrane translocase subunit TIM16 OS=Homo sapiens GN=PAM16 PE=1 SV=2 - [TIM16_HUMAN]	11831.7	10110.5	5661.32	21741.7	12331.8	7370.72	22061.7	24092.4	17860.8	25063.7	20171.5	19003	13288.4	19461.6	13063	30712.9	16221.9	14617.4	24705.6	19401.9	14425.8	18995.8	21713.4	17423.5	1.75827e-05	0.00343833	0.201835	0.0285894	0.893326	0.636859	0.756718	2.46365	0.695004	1.54379
O75208	2	2	87.65	Ubiquinone biosynthesis protein COQ9, mitochondrial OS=Homo sapiens GN=COQ9 PE=1 SV=1 - [COQ9_HUMAN]	5955.39	9523.49	4700.12	13168.3	11869.3	9346.05	7153.82	2763.88	3132.21	7862.47	4964.3	5216.33	6819.87	6951.61	10826.1	10257.9	8387.98	8809.93	6072.16	7261.01	5490.94	6588	8649.35	6557.95	0.00528399	0.56407	1	0.999843	-0.811325	-0.0679248	-0.425747	0.248667	0	6.83037e-05
Q8NEZ5	2	2	150.5	F-box only protein 22 OS=Homo sapiens GN=FBXO22 PE=1 SV=1 - [FBX22_HUMAN]	35406.1	23445	30629.8	23674.6	31484.5	32048.7	43007.8	38817.7	50082.7	46587.3	46486.7	45319.3	57002.5	30049.2	40497.5	34876.1	44714.3	41046.4	40816.8	36681.2	48215.4	44611.8	40912.3	44500.2	0.00097169	0.0248025	0.26092	0.101475	0.61336	0.490212	0.533456	1.6055	0.583493	0.993639
Q9NYL9	3	2	224.74	Tropomodulin-3 OS=Homo sapiens GN=TMOD3 PE=1 SV=1 - [TMOD3_HUMAN]	29860.5	23836	23512	23536.7	30185.9	25317.3	25063.7	26466.2	20135.7	21656.6	22202.3	20912.9	19373.6	19918.7	20550.7	20244.9	20587.2	22307.4	22400.2	24654.2	18398.4	18844.7	24358.5	21768.4	0.103454	0.944971	0.182743	0.618886	-0.195602	-0.345388	-0.260628	0.0245813	0.73816	0.208389
Q9Y2P8	2	2	106.03	RNA 3'-terminal phosphate cyclase-like protein OS=Homo sapiens GN=RCL1 PE=1 SV=3 - [RCL1_HUMAN]	6445.6	14433.9	8311.86	13556.8	9225.25	14468.4	21018.7	15373.4	25685.1	21848.6	26134.4	41156.6	20110.7	30405.1	10331.5	15793.4	16346.1	22251.4	20907.7	19750.1	16112.1	21529.3	18127.1	32115.8	0.00133312	0.0009419	0.161817	0.0170288	1.18645	0.794455	0.952078	3.026	0.790976	1.76882
P68431	7	2	382	Histone H3.1 OS=Homo sapiens GN=HIST1H3A PE=1 SV=2 - [H31_HUMAN]	207150	102671	66330.6	41441.4	58634.9	22867.4	139675	153495	562249	519266	282127	63945.5	304443	136826	32983.2	84993.6	101931	36016.2	282703	386629	182128	164914	38871.4	4072.63	0.014641	0.93436	1	1	1.78566	0.482244	1.08575	0.029486	6.83267e-11	3.91792e-10
Q16342	2	2	82.39	Programmed cell death protein 2 OS=Homo sapiens GN=PDCD2 PE=1 SV=2 - [PDCD2_HUMAN]	12614.1	18238	11192.2	10339.4	3938.55	22198.2	7041.98	9813.54	2772.22	9076.34	6589.53	3462.25	3447.99	10911.4	7737.11	1032.7	2605.86	9423.63	5991.57	5451.04	4495.33	4226.6	5247.47	12770.3	0.00783204	0.86891	0.329957	0.879256	-1.01865	-1.15919	-1.04017	0.0610252	0.481543	0.0558848
P42696	2	2	114	RNA-binding protein 34 OS=Homo sapiens GN=RBM34 PE=1 SV=2 - [RBM34_HUMAN]	3561.14	4071.35	3712.5	4449.23	2718.33	1872.27	6558.16	6414.54	11745.1	7449.87	11733.7	9486.6	7509.89	5218.68	5165.25	7341	5444.45	4849.68	10400.3	5680.41	6493.74	7201.92	4661.25	7580.69	1.34553e-09	0.00174434	0.365381	0.0709408	1.38902	0.801499	1.04352	2.75837	0.437254	1.1491
O95453	2	2	93.19	Poly(A)-specific ribonuclease PARN OS=Homo sapiens GN=PARN PE=1 SV=1 - [PARN_HUMAN]	4359.63	9042.88	6246.78	3820.55	5987.87	4842.43	12666.1	11725.1	7497.54	11563.9	9164.27	12322.9	6850.86	6514.59	7339.15	7070.71	1738.47	9144.32	8628.93	10040.5	8192.19	7593.7	7023.65	7598.05	0.013027	0.325953	1	0.968376	0.92089	0.172557	0.516835	0.486845	0	0.0139559
Q4G0J3	3	2	150.82	La-related protein 7 OS=Homo sapiens GN=LARP7 PE=1 SV=1 - [LARP7_HUMAN]	10519.5	10779.6	15105.8	15725.4	18330.1	21545.6	21427.5	25863.5	24676	25995.1	20065.4	19449.7	17919.4	13834.1	20142.3	20057.8	14073.7	12228	14899.9	16262.3	30310.8	18078.7	14941.5	20136.6	0.000708698	0.469276	1	0.996751	0.579392	0.0948062	0.31718	0.328571	6.80028e-10	0.00141339
Q05682	2	2	114.81	Caldesmon OS=Homo sapiens GN=CALD1 PE=1 SV=3 - [CALD1_HUMAN]	14658	14406.9	6677.38	8248.54	6392.32	17259.7	14345.8	19176.4	13020.2	8988.94	6585.91	11921.1	16734	16444.4	13492.4	14128	7097.32	18843.3	13404.9	17458.3	13181.5	6345.35	10970.6	17860.8	0.0002057	1	0.980395	0.999891	0.130332	0.35875	0.227953	4.17159e-08	0.0085987	4.75364e-05
O15031	2	2	80.26	Plexin-B2 OS=Homo sapiens GN=PLXNB2 PE=1 SV=3 - [PLXB2_HUMAN]	2323.52	140.321	2119.78	6220.25	4526.51	2603.43	7474.11	5095.25	6344.83	10120.2	10735.4	8988.04	2505.92	1219.61	2830.53	5172.33	4018.7	3076.51	6393.7	1705.94	2700.14	5501.7	6644.11	6254.71	1.52762e-05	0.00253703	0.998143	0.460966	1.44295	0.0698598	0.703301	2.59567	0.000807173	0.336331
P24666	3	2	240.66	Low molecular weight phosphotyrosine protein phosphatase OS=Homo sapiens GN=ACP1 PE=1 SV=3 - [PPAC_HUMAN]	80219.7	90376.6	69216.7	73681.7	79694.1	96083.2	68833.7	81679.5	46379.5	45655.7	44186.4	55913	65754.2	68889.5	55777	45014.6	55959.4	80016.9	64893	60788.8	60196.2	51669.3	55727.4	71882.4	1.83654e-20	0.019463	0.243526	0.213853	-0.51391	-0.397617	-0.422119	1.71079	0.613455	0.669885
Q8WW33	2	2	127.79	Gametocyte-specific factor 1 OS=Homo sapiens GN=GTSF1 PE=1 SV=2 - [GTSF1_HUMAN]	54352.8	60657.5	40553	50051.8	57042.5	63358.2	37159.1	34893.1	26400.6	34132.1	38438.6	39627.9	31840.6	29932.2	27801.9	21805.8	34443.1	40952.6	36723.7	30533.2	35700.7	29448.6	33978.9	39633.5	3.68673e-14	0.00309275	1.56063e-05	0.00151487	-0.630084	-0.803631	-0.662168	2.50965	4.8067	2.81962
A1L0T0	2	2	97.85	Acetolactate synthase-like protein OS=Homo sapiens GN=ILVBL PE=1 SV=2 - [ILVBL_HUMAN]	21931	21824.1	21427	32178.5	26905.5	22884.3	18523.1	23767.9	18669.6	24504.3	20652.9	18068.3	21349.2	23670.5	23713.4	24690.6	17703.1	18426.4	21378	20135.4	19183.8	23488.6	24941.8	19164.9	1.4709e-05	0.812446	0.982171	0.970531	-0.244789	-0.183747	-0.197855	0.0902056	0.00781293	0.0129905
Q9UK41	2	2	43.97	Vacuolar protein sorting-associated protein 28 homolog OS=Homo sapiens GN=VPS28 PE=1 SV=1 - [VPS28_HUMAN]	1291.53	1482.58	956.135	272.281	459.379	1364.45	572.617	1066.89	480.82	217.249	133.244	380.811	536.608	745.042	698.047	150.223	215.02	723.442	467.815	1197.02	641.005	107.441	68.1583	634.704	0.437341	1	1	0.999997	-1.03081	-0.925113	-0.902829	1.72024e-07	1.29727e-08	1.32392e-06
Q9NTZ6	3	2	78.59	RNA-binding protein 12 OS=Homo sapiens GN=RBM12 PE=1 SV=1 - [RBM12_HUMAN]	35269.8	39234.3	27401.4	27591.1	29837.2	44855.7	24762.8	35939.5	23196.5	23533.9	21666.5	24205.6	26156.1	25965.8	27934.4	38756.7	24822.4	29511.1	25807.3	28673.6	28936.9	19320.1	35139.3	28038.4	9.46759e-07	0.285259	0.976229	0.817073	-0.413506	-0.237916	-0.299461	0.544761	0.0104483	0.0877392
Q15392	2	2	99.59	Delta(24)-sterol reductase OS=Homo sapiens GN=DHCR24 PE=1 SV=2 - [DHC24_HUMAN]	45642.1	51783.5	36618.6	65088.5	43876.8	66835.5	37402.5	43066.4	23645.9	41033	28114.5	32020	43590.3	49573.9	46365.5	54427.7	41875.2	51305.5	39889	45550.9	37861	40114.6	45311.9	39208	1.94276e-08	0.00386778	1	0.772382	-0.593938	-0.109801	-0.321583	2.41254	2.5154e-08	0.112168
Q9P2T1	2	2	81.68	GMP reductase 2 OS=Homo sapiens GN=GMPR2 PE=1 SV=1 - [GMPR2_HUMAN]	8511	6548.34	5504.3	4313.2	6786.3	6947.17	3641.04	4998.88	3183.85	2039.64	3725.06	3502.32	6041.44	5429.11	4724.15	4795.2	5978.91	6098.86	3383.9	6130.76	5872.82	2995.73	5355.22	3569.57	2.21834e-06	0.0313506	0.999992	0.73493	-0.872373	-0.223565	-0.499663	1.50375	3.39725e-06	0.133754
Q9BVJ6	3	2	148.04	U3 small nucleolar RNA-associated protein 14 homolog A OS=Homo sapiens GN=UTP14A PE=1 SV=1 - [UT14A_HUMAN]	4250.08	3886.54	3974.53	5364.46	3692.26	2469.89	11033.5	8244.19	15592.6	12579	15007.9	15191.7	8442.85	8612.09	4280.41	6631.9	7933.93	4831.97	9010.71	8311.1	9911.73	8437.31	6852.33	9529.15	2.80293e-18	1.16436e-09	0.0528766	7.45557e-05	1.71587	0.78511	1.13887	8.93391	1.27674	4.12752
Q6NYC1	2	2	162.94	Bifunctional arginine demethylase and lysyl-hydroxylase JMJD6 OS=Homo sapiens GN=JMJD6 PE=1 SV=1 - [JMJD6_HUMAN]	25411.4	24031.8	15447.7	14519.5	15462.1	28663.6	21473.2	19881.7	13648.2	7996.62	10729.1	19750	17760.2	16013.3	16765.6	8772.04	14720.8	23936.6	14845.4	18578.5	18909.4	10147.7	14118.4	21316	0.13969	0.832971	0.977836	0.987325	-0.402222	-0.334541	-0.335324	0.0793701	0.00973388	0.00553966
P51003	2	2	99.08	Poly(A) polymerase alpha OS=Homo sapiens GN=PAPOLA PE=1 SV=4 - [PAPOA_HUMAN]	14865.2	19869	12211.2	6540.18	10479.7	20589	14792.5	12527.8	8895.33	2980.45	2933.94	12027.2	13475.6	8338.33	10911.3	5044.23	5253.17	17093.8	8821.29	11303	12616.1	3911.65	9032.52	13448	9.14462e-08	0.273363	0.903586	0.925778	-0.642721	-0.492115	-0.515923	0.56326	0.0440305	0.0334931
Q01081	3	2	99.01	Splicing factor U2AF 35 kDa subunit OS=Homo sapiens GN=U2AF1 PE=1 SV=3 - [U2AF1_HUMAN]	10213.6	19387.5	20047.9	32648.3	13750.8	31441.7	43580	16791.5	46717.5	40146	60413.4	70826.7	42702	33546.9	19297.6	20894.7	47209.2	41515.3	33209.1	17338.4	30517.7	45128.3	44529.5	54012.9	0.0685802	0.285073	0.918431	0.75869	1.12717	0.686407	0.817847	0.545044	0.0369536	0.119936
Q14677	2	2	135.99	Clathrin interactor 1 OS=Homo sapiens GN=CLINT1 PE=1 SV=1 - [EPN4_HUMAN]	18928.3	22705	17735.5	32188.5	19043.7	21082.6	15404.3	15675.6	12962.9	11174.7	14301.8	13656.6	15670.6	12867.6	18752.2	21771.3	13920.9	16836.7	11577.2	16547.7	17445.7	19054.9	15367.8	14625.8	2.83291e-09	0.0110798	0.543256	0.248848	-0.662836	-0.399684	-0.476871	1.95547	0.264996	0.604066
Q96GC9	2	2	105.95	Vacuole membrane protein 1 OS=Homo sapiens GN=VMP1 PE=1 SV=1 - [VMP1_HUMAN]	13684.5	8721.04	5170.89	17049.2	15341.7	8701.72	28344.2	26263.5	10381.6	23067.8	13312.5	15988.2	15637.3	17570.8	10890.7	28522.5	14511.6	14031	19891	20068.5	14117.6	17517.5	20456.2	11572.1	0.00937028	0.433208	0.852351	0.711213	0.773183	0.558963	0.593612	0.363304	0.0693814	0.148
P23229	2	2	90.29	Integrin alpha-6 OS=Homo sapiens GN=ITGA6 PE=1 SV=5 - [ITA6_HUMAN]	2343.61	5506.57	1090.94	7642.18	5770.12	6459.71	6651.77	6150.17	3833.74	12652.2	9650.81	10590.5	6788.78	6824.21	2930.55	13080.4	13557.3	7289.24	4850.95	5584.46	7106.58	8137.95	8794.75	12544.6	3.75591e-08	0.200684	0.254855	0.261067	0.781551	0.808715	0.706526	0.697487	0.593707	0.583249
Q13630	2	2	141.29	GDP-L-fucose synthase OS=Homo sapiens GN=TSTA3 PE=1 SV=1 - [FCL_HUMAN]	33015.5	41625.3	29259.7	21749.2	35060.4	55528.7	27258.4	26181	19325.6	24796.6	23729.1	26209.5	27496.8	26286.5	31116.4	25785.4	38527.1	44853.5	19172.6	33671.1	29295.1	30526.5	33702.7	28405	1.25682e-08	0.337181	0.999999	0.987746	-0.551909	-0.156081	-0.307143	0.472137	2.59747e-07	0.00535493
Q8NI27	2	2	150.76	THO complex subunit 2 OS=Homo sapiens GN=THOC2 PE=1 SV=2 - [THOC2_HUMAN]	13404.8	7619.31	7981.26	14888.5	9310.94	9018.16	13475	13440.4	20429.2	20681.2	18589.8	21622.9	13193.5	12749.5	10387.3	15658.5	14808	13150.6	10859.3	11758.1	15223.9	15022.8	16322.7	18694.7	2.21278e-06	0.0197624	0.906886	0.550161	0.798692	0.361604	0.498112	1.70416	0.0424475	0.25951
Q9NPI6	2	2	69.69	mRNA-decapping enzyme 1A OS=Homo sapiens GN=DCP1A PE=1 SV=2 - [DCP1A_HUMAN]	4941.28	7138.7	5697.57	6607.86	6641.58	8092.45	5091.44	4278.54	3663.32	3498.06	5361.74	5764.98	3288.03	4214.27	5538.45	3522.06	3919.26	5378.62	2937.84	4526.43	4367.42	4547.76	6069.62	5838.12	0.201951	0.998414	0.988235	0.999016	-0.500184	-0.597125	-0.467737	0.000689214	0.00513967	0.000427686
P28482	6	2	315.61	Mitogen-activated protein kinase 1 OS=Homo sapiens GN=MAPK1 PE=1 SV=3 - [MK01_HUMAN]	23335	31311.3	28400.1	34029.9	30666.7	38737.3	18767.2	19127.1	19113.4	23930.7	23661.8	21868.4	26280.1	22535.3	23634.6	29081.2	29877.4	30875.1	23810.1	24154.6	23884.6	26892.5	26310.4	23916.8	1.1566e-09	0.000328424	0.946091	0.31773	-0.560243	-0.200506	-0.32401	3.48356	0.024067	0.497942
Q92783	3	2	174.67	Signal transducing adapter molecule 1 OS=Homo sapiens GN=STAM PE=1 SV=3 - [STAM1_HUMAN]	20703.2	21801.7	16552.4	15738.7	19728.5	32176.6	16180.6	13584.8	10347.5	10114.7	11251.8	16919.3	15761.3	13512.2	18714.2	10280.3	12273.7	21597.1	11425.1	12922.6	9007	14275.4	23021.5	19566.7	4.5004e-05	0.0629146	0.619358	0.407469	-0.692528	-0.45955	-0.489935	1.20125	0.208058	0.389905
P35080	2	2	178.5	Profilin-2 OS=Homo sapiens GN=PFN2 PE=1 SV=3 - [PROF2_HUMAN]	109107	135462	100696	117638	137528	163879	82315.3	92769.4	53267.8	75024.1	65614.7	74957.5	79010.8	76768.4	81631.7	78629.7	86663.1	116973	76633.9	92015.5	87632	84810	91375.8	82859.3	4.26371e-05	0.165248	0.743667	0.746988	-0.783765	-0.556543	-0.568671	0.781863	0.128622	0.126686
O00233	2	2	90.46	26S proteasome non-ATPase regulatory subunit 9 OS=Homo sapiens GN=PSMD9 PE=1 SV=3 - [PSMD9_HUMAN]	6989.76	8123.46	5468.84	3641.7	2811.71	9590.48	3977.03	5111.39	2864.81	1131.73	1835.06	3063.65	4210.83	3549.21	4527.81	2591.02	2671.34	3877.32	3899.92	5111.73	3506.37	3480.4	4801.41	866.379	0.000313066	0.998125	0.999995	0.999933	-1.02618	-0.773402	-0.75742	0.000814851	2.00424e-06	2.92708e-05
O75717	3	2	202.34	WD repeat and HMG-box DNA-binding protein 1 OS=Homo sapiens GN=WDHD1 PE=1 SV=1 - [WDHD1_HUMAN]	12955	17109.5	11710.1	6622.05	9939.41	22803.9	15968.3	14168.9	7027.84	2559.73	4602.36	13813.8	5982.13	11827	12249.3	5568.56	4671.42	14440.8	11570.5	10275.6	13702.5	3039.13	7340.92	13899.2	0.0151881	0.945588	0.975384	0.996826	-0.48086	-0.567836	-0.439594	0.0242979	0.0108244	0.00138071
P35237	2	2	93.36	Serpin B6 OS=Homo sapiens GN=SERPINB6 PE=1 SV=3 - [SPB6_HUMAN]	19428.8	23986.4	18320.4	24286.4	30629.4	32876.8	12891.4	14473.4	9477.23	11955.2	11977.1	14593.5	18659.5	17302.7	19216.8	16669	21780.9	26937.3	13808.6	18164.3	14745.5	13031.2	23705.8	19436.4	4.98889e-11	0.000216802	0.981272	0.298424	-0.988397	-0.310593	-0.539293	3.66394	0.00821062	0.525166
Q9BW27	2	2	73.97	Nuclear pore complex protein Nup85 OS=Homo sapiens GN=NUP85 PE=1 SV=1 - [NUP85_HUMAN]	16577.7	17239.5	18769.8	20099.2	20534.1	25581.1	23107.4	17296.3	19578.6	22558.4	22597	18109.6	4249.36	14520.4	14850.8	14963.6	13534.9	23927.8	16865.6	9574.62	20483.6	17861.5	19074.6	21842.8	0.418794	1	0.522882	0.999995	0.0530054	-0.465355	-0.168538	0	0.281596	2.36003e-06
Q96I25	2	2	119.33	Splicing factor 45 OS=Homo sapiens GN=RBM17 PE=1 SV=1 - [SPF45_HUMAN]	17088.6	24169.4	11863.4	16869.7	13097.9	18387.6	21774.7	25267.7	16309.4	18749.6	13945.8	23649.8	19486.8	17089.8	14581.3	13715	10678.2	19218.9	20316.7	22307.7	17379	12013.3	12680.5	20790	0.0136159	0.998304	1	1	0.238239	-0.0986451	0.05592	0.000737364	3.0482e-10	0
P06132	2	2	109.32	Uroporphyrinogen decarboxylase OS=Homo sapiens GN=UROD PE=1 SV=2 - [DCUP_HUMAN]	13167.7	18455.2	16810.8	8661.19	17345.8	18640.2	11939.7	13007.2	9156.41	8465.4	11669.3	10964.4	16850.7	13092.9	16948.4	13775.7	17721.1	17605.4	12234	14461.6	15979.4	11342.1	15288.7	12442.2	0.0649087	0.968798	1	1	-0.513562	0.0444603	-0.187305	0.0137669	0	2.0096e-09
Q9H9J2	2	2	97.96	39S ribosomal protein L44, mitochondrial OS=Homo sapiens GN=MRPL44 PE=1 SV=1 - [RM44_HUMAN]	23255.2	19131.7	18330.7	38011.5	26702.5	29220.1	21080.8	17453.6	23105.1	31221.2	43429.3	26399	18303.6	21388	23263.2	36740.9	49868.8	25450.4	22100.9	20576.9	25300.5	37737.7	33127.6	26942.8	0.998091	1	1	1	0.0730943	0.178455	0.100304	0	3.87468e-10	2.14372e-11
Q8IWS0	2	2	81.06	PHD finger protein 6 OS=Homo sapiens GN=PHF6 PE=1 SV=1 - [PHF6_HUMAN]	7764.02	3452.55	3971.18	2199.12	2169.58	5113.48	8244.02	9352.58	8915.21	7969.56	3724.72	8103.9	5019.08	5725.67	3817.69	7134.16	5938.15	6115.26	7869.35	8162.19	4521.28	4502.48	3982.62	6680.87	0.0523489	0.366732	0.980582	0.95873	0.90857	0.452134	0.53393	0.435652	0.00851595	0.0183038
Q9NX40	2	2	139.59	OCIA domain-containing protein 1 OS=Homo sapiens GN=OCIAD1 PE=1 SV=1 - [OCAD1_HUMAN]	15881.3	11998.8	2612.99	14028	5954.64	5482.39	19132.3	22437.1	15951.3	9174.57	10619	17808.8	13068	16707.4	10940.8	16738.7	13445	13983.6	17990.5	22651.2	11198.8	11147.9	8075.48	10031	0.00556984	0.362742	0.586274	0.854567	0.765445	0.601133	0.535261	0.440402	0.231899	0.0682541
Q9UJW0	2	2	97.36	Dynactin subunit 4 OS=Homo sapiens GN=DCTN4 PE=1 SV=1 - [DCTN4_HUMAN]	9142.69	7254.97	7445.28	8098	7734.41	9674.77	5792.13	6802.22	6034.04	6036.22	6309.03	4921.66	5493.62	7137.77	5787.9	6937.75	7104.94	8087.82	3742.42	7311.8	7465.49	5011.61	9847.65	7083.75	0.000723169	0.901386	0.999118	0.992825	-0.459259	-0.283358	-0.28646	0.0450893	0.000383374	0.00312734
Q9Y3E0	2	2	107.89	Vesicle transport protein GOT1B OS=Homo sapiens GN=GOLT1B PE=1 SV=1 - [GOT1B_HUMAN]	1195.34	777.661	1001.09	2772.68	2680.82	159.794	5181.38	5044.03	4503.2	4414.06	3845.2	5451.38	3811.59	4749.05	3126.45	4039.25	2834.16	2069.87	5286.31	2984.18	3023.92	2472.56	4379.68	727.402	0.00187894	0.596047	0.915964	0.985675	1.72759	1.26448	1.13611	0.22472	0.0381216	0.00626608
P14635	2	2	127.83	G2/mitotic-specific cyclin-B1 OS=Homo sapiens GN=CCNB1 PE=1 SV=1 - [CCNB1_HUMAN]	10078.2	11740.9	7381.13	12598.2	14691.2	12781.2	21869.6	24625.9	19911.8	12079.1	17402.5	20373.1	16638.3	24332.5	20240.4	20664.6	15572.1	23299.3	14628.1	11413.9	20643.4	14241.9	23577.4	18514.1	3.9569e-21	0.0893941	0.0366361	0.500269	0.747055	0.801666	0.572585	1.04869	1.43609	0.300797
O75569	2	2	143.09	Interferon-inducible double-stranded RNA-dependent protein kinase activator A OS=Homo sapiens GN=PRKRA PE=1 SV=1 - [PRKRA_HUMAN]	8411.81	8179.91	4785.62	1927.13	2483.45	5234.19	9067.93	8647.42	8655.81	6752.05	1744.34	5613.84	7889.46	7952.83	6593.83	7054.58	5792.71	5729.25	10028	8722.93	6772.32	3425.25	1830.09	7165.52	0.000192825	0.999389	0.963392	0.999996	0.383962	0.402773	0.290578	0.000265278	0.0161971	1.63951e-06
Q9H3K6	2	2	155.22	BolA-like protein 2 OS=Homo sapiens GN=BOLA2 PE=1 SV=1 - [BOLA2_HUMAN]	72041.8	89348	51978.8	67687.2	77955.1	95239.5	54949.2	67552.2	54386	43437.8	56851.5	58945.1	60935.7	65541.3	52984.3	60042.9	61619.8	79656.8	58063.4	66808.6	60344.7	62874.8	61711.5	71128.6	8.4421e-10	0.0285713	0.779586	0.823719	-0.434504	-0.254527	-0.253956	1.54407	0.108136	0.0842209
Q12834	2	2	52.52	Cell division cycle protein 20 homolog OS=Homo sapiens GN=CDC20 PE=1 SV=2 - [CDC20_HUMAN]	792886	816613	713256	939968	1.06486e+06	984537	456355	518589	360563	521944	550321	421999	549779	559421	581518	612273	672912	634188	458908	639438	624504	632283	769244	545280	3.49902e-15	3.64955e-08	0.00535944	0.00692436	-0.908603	-0.557253	-0.533643	7.43776	2.27088	2.15962
Q9C0C9	2	2	147.83	Ubiquitin-conjugating enzyme E2 O OS=Homo sapiens GN=UBE2O PE=1 SV=3 - [UBE2O_HUMAN]	33007.4	27992	22096.9	23354.3	25901.1	34257.2	13383.4	21612.6	11550.3	10890.1	11142.9	11129.9	13906	19541.9	17159.7	18065.3	14180.3	20690.1	19827.1	19559	18350.1	16630	17969.8	16305.8	6.25752e-14	1.02212e-08	0.00153229	0.0108314	-1.06365	-0.68623	-0.616888	7.9905	2.81466	1.96531
Q9Y256	2	2	76.4	CAAX prenyl protease 2 OS=Homo sapiens GN=RCE1 PE=1 SV=1 - [FACE2_HUMAN]	8969.9	4609.48	5270.26	9041.57	10731.5	7921.43	11789	11490.6	7684.2	10806.1	7792.94	7720.12	8665.95	8529.01	11832.3	11026.3	7108.44	8787.57	10140.8	9851.63	9056.03	7413.69	9166.67	7792.24	0.000577271	0.930284	0.967014	0.995579	0.299504	0.265527	0.198809	0.0313842	0.0145671	0.00192446
P53367	2	2	112.19	Arfaptin-1 OS=Homo sapiens GN=ARFIP1 PE=1 SV=2 - [ARFP1_HUMAN]	6469.77	7725.29	5831.89	7183.58	8947.08	7964.98	1949.16	6341.43	2294.5	2347.06	3470.33	3780.41	4228.43	3106.93	3473.98	4899.49	3141.24	6714.12	2877.69	2928.98	3970.99	4818.93	7027.69	6103.94	0.0176398	0.0431116	0.574468	0.76306	-1.12839	-0.787393	-0.670162	1.36541	0.240734	0.117441
P51553	2	2	76.4	Isocitrate dehydrogenase [NAD] subunit gamma, mitochondrial OS=Homo sapiens GN=IDH3G PE=1 SV=1 - [IDH3G_HUMAN]	4522.38	9843.76	4770.79	20477.1	22471.6	36645.6	3849.69	4824.32	3151.41	13906.2	16589.3	28283.9	5176.24	10063.2	6706.92	1930.84	21882.2	47493.8	4561.7	8110.92	3312.98	16663.8	21954.3	31489.9	1.27318e-05	0.999652	0.999996	1	-0.483739	-0.0823521	-0.197601	0.00015129	1.85725e-06	2.95397e-10
Q96KG9	2	2	122.59	N-terminal kinase-like protein OS=Homo sapiens GN=SCYL1 PE=1 SV=1 - [NTKL_HUMAN]	16620.3	21950.7	30784.7	14640.5	14553.9	22755.5	10816.4	10553.6	13374.6	5804.91	12654.9	11861.9	10069.8	15906.5	18896.6	10343.3	10482.2	19300.9	12763.9	17112.7	11656.3	10163.7	18733.2	15813.3	0.000166884	0.0127434	0.653669	0.790712	-0.898666	-0.513121	-0.492165	1.89471	0.184642	0.101982
Q96C01	2	2	82.55	Protein FAM136A OS=Homo sapiens GN=FAM136A PE=1 SV=1 - [F136A_HUMAN]	5332.15	5982	4433.8	14411.1	8641.69	3550.3	4122.75	7391.41	3303.31	12355.2	10130.5	2249.56	3051.04	3982.76	3724.92	12850.7	7298.9	4169.4	3250.04	6711.93	5356.2	11204.5	7506.94	4706.57	0.856955	1	0.999999	1	-0.0986237	-0.271844	-0.128717	1.41362e-10	2.29396e-07	0
Q9NZL9	2	2	183.78	Methionine adenosyltransferase 2 subunit beta OS=Homo sapiens GN=MAT2B PE=1 SV=1 - [MAT2B_HUMAN]	87187.4	73374.6	68431.7	65738.5	77590.2	98467.8	67295.5	63191	52714.7	46357.1	66097.1	69360.1	60108.6	61575.4	56629.5	52900.2	59731.3	75003.2	63176.5	56047.2	60771.5	71180.3	73426.3	70777.1	1.32347e-12	0.00311336	0.00479524	0.246335	-0.367126	-0.363444	-0.251849	2.50677	2.31919	0.608474
Q86VM9	2	2	109.59	Zinc finger CCCH domain-containing protein 18 OS=Homo sapiens GN=ZC3H18 PE=1 SV=2 - [ZCH18_HUMAN]	12560.6	7675.64	4802.62	8181.81	10888.4	22303.9	11843.9	10316.9	9469.16	12217.5	6535.33	15725.3	7762.8	5106.2	10542.3	8760.05	6986.27	12390.3	10909.1	8532.87	11920.1	6086.02	9703.59	13645.7	0.162872	1	0.99992	1	-0.00663771	-0.365552	-0.127455	8.06715e-11	3.4925e-05	0
Q9BWD1	2	2	85.12	Acetyl-CoA acetyltransferase, cytosolic OS=Homo sapiens GN=ACAT2 PE=1 SV=2 - [THIC_HUMAN]	61336.3	64287.2	59382.3	49389.8	63169.2	53693.7	52274.2	44529.2	40462.5	33571.8	42394.3	50000.4	56231.4	60710.3	54286.1	38488.2	55735.9	65648.9	48263	38779.9	49767.3	53556.8	73547.9	48888.3	0.00433847	0.460972	1	0.999449	-0.416196	-0.0852625	-0.167278	0.336326	1.90921e-08	0.000239215
Q9BXW9	3	2	187.65	Fanconi anemia group D2 protein OS=Homo sapiens GN=FANCD2 PE=1 SV=2 - [FACD2_HUMAN]	6686.67	8770.34	6376.6	4276.83	4966.31	8026.55	7803.78	8428.71	7483.51	8502.68	6418.63	5410.47	4491.92	3956.4	3985.15	4916.67	3913.69	5104.2	5690.98	8487.67	7632.09	3762.39	3856.69	6263.84	0.00179721	1	0.999824	1	0.171778	-0.568501	-0.131623	2.051e-11	7.64628e-05	0
Q13595	2	2	144.69	Transformer-2 protein homolog alpha OS=Homo sapiens GN=TRA2A PE=1 SV=1 - [TRA2A_HUMAN]	14843.3	7427.21	5985.83	8788.77	7946.65	1610.49	18643.1	11766	43855.6	37196.3	31499.8	25904.4	26377.7	20283	9122.92	23661.9	25830.7	12628.4	29659.8	12283.1	13230.8	24443.2	12177	4338.39	8.92618e-05	0.0874599	0.499634	0.933463	1.8574	1.33915	1.04462	1.05819	0.301348	0.029903
Q9UBB6	2	2	100.84	Neurochondrin OS=Homo sapiens GN=NCDN PE=1 SV=1 - [NCDN_HUMAN]	14891.5	8510.72	6396.62	9199.43	7477.44	9332.79	8168.91	4119.34	4684.31	7402.76	9149.73	4469.52	6324.91	5520.83	6127.17	5359.2	6805.55	8642.82	5318.69	5575.65	8860.84	8860.18	9836.19	5746.49	0.000311872	0.328146	0.609845	0.97619	-0.554691	-0.525154	-0.336502	0.483933	0.214781	0.0104657
Q9Y3B7	2	2	85.21	39S ribosomal protein L11, mitochondrial OS=Homo sapiens GN=MRPL11 PE=1 SV=1 - [RM11_HUMAN]	22409.4	18500.6	16198.4	18386.1	14680	24228.3	16898.9	14656.3	19212.9	14927.5	14927.4	19896.9	13588.2	21444.9	16807.1	26815.5	18638.2	17753.3	17934.4	19890.7	21253.3	18264.4	12311.6	20485.4	0.0137927	0.999945	1	1	-0.186644	0.00810097	-0.0547872	2.39132e-05	0	0
P37198	3	2	171.53	Nuclear pore glycoprotein p62 OS=Homo sapiens GN=NUP62 PE=1 SV=3 - [NUP62_HUMAN]	12892.6	15394.2	14616.1	6619.16	7702.52	9210.14	22289.1	19085.1	17632	15906.8	9697.47	15333.4	15114.3	14740.9	20033.5	5687.04	6979.02	10708.8	20368.7	10572.1	15500.1	8000.76	10512.8	12584.1	0.537146	0.946621	1	1	0.58918	0.141158	0.222978	0.0238239	0	7.48657e-08
Q7L5N1	2	2	79.99	COP9 signalosome complex subunit 6 OS=Homo sapiens GN=COPS6 PE=1 SV=1 - [CSN6_HUMAN]	55125.4	77260.8	69334	77036.8	76840.4	97302.3	63320.6	50476	44961.3	42950.2	56545.2	52772.1	67708.8	65943.5	56797.6	51628.4	58684.2	72828	67734.2	51042.2	60993	53871.8	79171.8	68987.8	0.000962648	0.0570769	0.944806	0.977051	-0.542159	-0.277734	-0.246371	1.24354	0.0246572	0.0100829
Q12972	2	2	96.54	Nuclear inhibitor of protein phosphatase 1 OS=Homo sapiens GN=PPP1R8 PE=1 SV=2 - [PP1R8_HUMAN]	12185.8	11825.6	10085.9	11164.1	16900.4	19565.6	11253.9	12640.2	7749.62	6944.14	9684.56	12683	8441.73	8609.62	7006.48	9599.72	11112.4	16058	8472.67	9733.47	9159.82	9812.51	15745.5	15561.7	5.97348e-14	0.651389	0.578394	0.99157	-0.423067	-0.426086	-0.255018	0.18616	0.237776	0.00367682
Q13526	2	2	131.78	Peptidyl-prolyl cis-trans isomerase NIMA-interacting 1 OS=Homo sapiens GN=PIN1 PE=1 SV=1 - [PIN1_HUMAN]	15056	22229.9	8858.14	5492.6	6261.69	20855.3	9007.54	15711.2	3634.23	788.01	3503.31	8284.35	11205.9	12731.5	8364.54	2239.3	2342.06	16349.5	10430.9	16794.8	8577.48	2548.37	4673.77	14851.7	0.0104739	0.624864	0.99498	0.999958	-0.944238	-0.565034	-0.444358	0.204214	0.00218561	1.84073e-05
P61026	8	2	468.78	Ras-related protein Rab-10 OS=Homo sapiens GN=RAB10 PE=1 SV=1 - [RAB10_HUMAN]	22229.5	25728.6	24045.1	29846.4	30821.9	11255	54173.8	57430.6	55608.1	57664.4	55401	47093.7	38452.5	45838	33782.5	46463.4	32635.8	21817	44120.4	39539.7	29203.5	32801	38702.4	22579.8	5.16189e-10	7.11046e-05	0.374882	0.594724	1.1856	0.605528	0.523928	4.1481	0.426105	0.225685
Q6FI81	2	2	62.66	Anamorsin OS=Homo sapiens GN=CIAPIN1 PE=1 SV=2 - [CPIN1_HUMAN]	11965.4	11679.5	8729.46	11749.5	13840.9	13947.3	7814.49	8364.93	6017.34	7612.93	8545.47	6012.74	8359.75	9378.59	9930.27	9949.34	11713.2	11204.1	7686.92	10920	11777.4	11025.3	10533.6	7586.04	6.0611e-09	0.00514526	0.989241	0.957314	-0.696718	-0.24846	-0.272637	2.28859	0.00469775	0.0189456
P62136	18	2	1152.5	Serine/threonine-protein phosphatase PP1-alpha catalytic subunit OS=Homo sapiens GN=PPP1CA PE=1 SV=1 - [PP1A_HUMAN]	62290.8	66008.9	53391	85966.7	77698.8	81897.7	58213.6	54479	57664.4	60273.1	65296.4	64330.2	61279.7	56561.3	55145.5	70895.6	73743.8	68127.2	52975.2	60872.5	63013.7	64756.4	77927.5	75678.8	2.3121e-10	0.53335	0.989193	0.999486	-0.246069	-0.147416	-0.112423	0.272988	0.00471889	0.000223207
Q96EY7	3	2	199.92	Pentatricopeptide repeat domain-containing protein 3, mitochondrial OS=Homo sapiens GN=PTCD3 PE=1 SV=3 - [PTCD3_HUMAN]	13861.9	14687.5	9585.78	16269.5	12618	17230.2	12628.8	9126.74	9159.52	13551.4	18280.6	15172.7	19733.5	18939.7	14653.2	20303.8	14980.2	16884.3	10917.5	19179.1	12336.5	19088.4	13523.7	12762.5	0.000789836	0.999999	0.917525	1	-0.112738	0.324374	0.0596218	4.2313e-07	0.0373822	0
P21281	5	2	227.69	V-type proton ATPase subunit B, brain isoform OS=Homo sapiens GN=ATP6V1B2 PE=1 SV=3 - [VATB2_HUMAN]	20328.1	24738.1	21440.8	23908	28543.2	33360	18092.2	18592.2	17795.1	19505.2	17678	17871.9	21991.1	22874.7	23759.7	25374.2	23519.7	33913.5	17899.2	24849.7	17681.8	25234.9	24967.5	27948	2.26329e-13	0.0515111	1	0.99976	-0.475702	-0.00840873	-0.136359	1.2881	0	0.000104079
P51532	3	2	214.35	Transcription activator BRG1 OS=Homo sapiens GN=SMARCA4 PE=1 SV=2 - [SMCA4_HUMAN]	12092.2	9283.47	8679.67	17184.6	17004.5	14009.4	22605	19818.6	19695.8	19692.5	19211.3	22984	10246.1	18634.9	13847.4	21395.8	16348.7	19720	15838.3	11381.9	17800.9	15819.1	19724.2	14539.4	0.000984191	0.0293937	0.888636	0.970582	0.66419	0.356546	0.28134	1.53175	0.0512761	0.0129677
Q9H0W9	2	2	88.66	Ester hydrolase C11orf54 OS=Homo sapiens GN=C11orf54 PE=1 SV=1 - [CK054_HUMAN]	3928.02	4004.41	3024.79	6859.46	8868.35	8295.75	2089.45	2830.69	3785.51	1845.2	6112.55	4233.12	3073.27	2676.87	6196.94	4337.11	4398.63	6879.75	1952.01	5551.46	6345.63	4062.24	4069.14	6583.06	2.24399e-09	0.334316	0.999483	0.999843	-0.743299	-0.343852	-0.292388	0.475843	0.00022454	6.80138e-05
Q8WX92	2	2	119.5	Negative elongation factor B OS=Homo sapiens GN=NELFB PE=1 SV=1 - [NELFB_HUMAN]	31716.4	32927.3	25418.3	21869.5	28842.6	42346.8	26382	27350.4	16495.1	22069.5	17052	25610.7	20959.6	18872.8	23872.2	24044.7	15336.4	27051	29689.7	24930.6	25655.8	17985.9	28779.2	27650	0.000467596	0.410577	0.238493	0.994076	-0.440269	-0.492769	-0.243405	0.386606	0.622524	0.00258026
Q9Y5Z4	2	2	155.74	Heme-binding protein 2 OS=Homo sapiens GN=HEBP2 PE=1 SV=1 - [HEBP2_HUMAN]	23003.2	17225.2	9731.32	5097.67	8836.77	17057.6	8958.45	14146.4	8631.37	2552.25	5035.29	8883.93	13303.8	10853.2	10461.3	2002.98	7020.07	13969.7	11105.4	13306.9	10236.5	4753.25	13564.3	12018.8	0.0452928	0.883913	0.993729	1	-0.7478	-0.490717	-0.316955	0.0535904	0.00273206	8.58167e-09
P14324	2	2	80.53	Farnesyl pyrophosphate synthase OS=Homo sapiens GN=FDPS PE=1 SV=4 - [FPPS_HUMAN]	18951.9	22312.6	20291.2	19176.7	20327.4	22552.7	13101.8	15652.4	12508.8	9990.05	16003.5	11704.1	13326.8	11479	13937.2	13380.5	17190.7	16693.9	13156.7	16095.8	20330.2	18732.8	18371.2	13942.3	1.82314e-08	0.0137863	0.130175	0.909455	-0.646619	-0.523283	-0.296778	1.86055	0.885474	0.0412187
Q9BT09	2	2	126.09	Protein canopy homolog 3 OS=Homo sapiens GN=CNPY3 PE=1 SV=1 - [CNPY3_HUMAN]	94799.3	64835.6	36230.4	58365.3	43339	64989.7	62144.2	84787.7	25749.7	55123.7	36692.8	61358.1	34595.5	39310.4	51551.6	37333.8	33803.5	44923.2	37013.4	83760.5	36065.7	45565.4	45550.6	70646.1	0.00126501	0.999996	0.685729	0.999994	-0.153981	-0.586086	-0.186463	1.57568e-06	0.163848	2.58732e-06
Q9NXH9	2	2	79.35	tRNA (guanine(26)-N(2))-dimethyltransferase OS=Homo sapiens GN=TRMT1 PE=1 SV=1 - [TRM1_HUMAN]	8205.77	9808.9	11961.6	9598.39	12757.4	14026.7	6836	6984.82	9272.6	4476.44	5764.29	9951.53	7676.46	7921.23	12287.3	8187.01	9252.57	12482.1	7510.06	8825.53	11590.2	7243.18	14102.5	8297.27	0.00940843	0.124989	0.999871	0.99957	-0.616396	-0.19905	-0.205001	0.903127	5.60313e-05	0.000186814
P62942	2	2	157.21	Peptidyl-prolyl cis-trans isomerase FKBP1A OS=Homo sapiens GN=FKBP1A PE=1 SV=2 - [FKB1A_HUMAN]	251314	267732	191061	263000	276929	308662	220915	290701	145669	183451	181421	189820	203533	190513	186165	186761	210735	253970	208848	267518	215958	194739	265755	226574	4.75618e-08	0.279103	0.517047	0.997621	-0.36298	-0.339717	-0.17631	0.554236	0.28647	0.00103456
P30519	2	2	61.5	Heme oxygenase 2 OS=Homo sapiens GN=HMOX2 PE=1 SV=2 - [HMOX2_HUMAN]	11714.8	17549.2	16477.6	17914.3	15778.2	7952.37	8062.24	19354.4	14971.2	11648.8	8168.25	21918.8	10153.8	28118.6	23271.7	23572.3	9551.21	23189.7	19324.3	20457.7	22129.5	9091.68	14051.9	7515.46	0.0151918	1	0.999128	1	-0.0548982	0.431557	0.0831412	3.34144e-12	0.000378817	0
Q15738	2	2	81.35	Sterol-4-alpha-carboxylate 3-dehydrogenase, decarboxylating OS=Homo sapiens GN=NSDHL PE=1 SV=2 - [NSDHL_HUMAN]	9360.05	13209	14988.5	12612.1	11749.7	12327.8	11033	14300.9	13435.2	13561.9	14002.1	15920.9	15637.5	16505.4	16122.4	15391.4	15683.6	17168.2	12003.8	12695.3	13462.8	12992.8	13243.8	16062	1.2118e-17	0.999942	0.549595	0.999997	0.147752	0.378322	0.115945	2.49993e-05	0.259957	1.17655e-06
Q15904	2	2	95.44	V-type proton ATPase subunit S1 OS=Homo sapiens GN=ATP6AP1 PE=1 SV=2 - [VAS1_HUMAN]	3637.12	5614.11	2592.46	4519.66	6235.49	3856.81	7092.59	6541.9	3130.37	6072.64	3067.59	4057.39	5635.35	7212.13	5945.45	9991.77	5340.79	5663.49	6864.41	3952.99	4580.06	5860.68	5517.49	2679.61	0.048709	1	0.872543	1	0.179581	0.588794	0.154948	1.10965e-09	0.0592131	6.81427e-10
O75691	2	2	48.87	Small subunit processome component 20 homolog OS=Homo sapiens GN=UTP20 PE=1 SV=3 - [UTP20_HUMAN]	365.209	225.766	814.084	1095.07	1376.78	246.007	3336.64	1527.76	4435.16	4073.25	4170.36	3461.12	1894.59	2161.82	1622.76	2225.19	1749.67	404.556	1265.58	355.592	1139.11	1738.28	2207.81	145.123	0.0032949	0.931144	0.999903	1	2.34895	1.28669	0.732753	0.0309833	4.2127e-05	3.81007e-11
Q9BY42	2	2	77.78	Protein RTF2 homolog OS=Homo sapiens GN=RTFDC1 PE=1 SV=3 - [RTF2_HUMAN]	2920.66	3266.75	3232.5	3363.04	3326.47	4199.86	3125.84	4234.59	3646.68	3066.92	3447.27	4739.25	1589.95	1722.03	1903.21	1500.88	2606.46	2757.63	3047.67	3118.14	3232.2	3406.32	2814.57	3053.46	8.83284e-09	1	0.00405193	1	0.13235	-0.749499	-0.121234	1.59691e-07	2.39234	5.34371e-08
Q15907	5	2	426.03	Ras-related protein Rab-11B OS=Homo sapiens GN=RAB11B PE=1 SV=4 - [RB11B_HUMAN]	22790.5	20951.4	8527.63	10645.9	12976.3	6121.6	13134	20295.6	17897.9	20317.4	15052.1	18234	19959.1	11761.5	9411.25	7435.6	16084.8	14871.1	28996.8	16041.9	10384.9	13511.1	13492.1	3034.39	0.0765872	0.9999	1	1	0.35551	-0.0444822	0.0594111	4.35613e-05	0	0
Q9BUH6	2	2	95.57	Uncharacterized protein C9orf142 OS=Homo sapiens GN=C9orf142 PE=1 SV=2 - [CI142_HUMAN]	9258.63	9264.33	9840.12	19806.6	13934.2	10525.3	6745.76	3061.61	6146.17	9600.11	11855.6	7681.76	5932.05	5627.69	11272.7	7211.97	13230.1	8557.8	9564.39	10594.6	4662.94	17556.4	11980.7	7991.31	0.151931	0.44172	0.946571	0.999953	-0.687711	-0.486698	-0.220152	0.354853	0.0238466	2.03616e-05
O60749	2	2	43.76	Sorting nexin-2 OS=Homo sapiens GN=SNX2 PE=1 SV=2 - [SNX2_HUMAN]	4710.01	3687.58	5641.1	14287.3	12166.5	6207.58	3099.37	2801.55	2363.24	7976.21	9080.39	3604.86	3761.12	1136.4	3791.34	11239.5	5635.47	4196.16	3384.38	1935.81	5642.55	14495.4	8870.59	5216.77	3.42829e-12	0.995927	0.991185	1	-0.691078	-0.650051	-0.239914	0.00177231	0.00384543	8.8116e-08
Q9H9Y6	3	2	159.35	DNA-directed RNA polymerase I subunit RPA2 OS=Homo sapiens GN=POLR1B PE=1 SV=2 - [RPA2_HUMAN]	5509.71	4804.97	2780.36	1874.24	2027.21	1507.01	8417.38	12038.2	8472.86	3637.68	4136.49	6387.2	6507.98	9349.17	3759.06	4540.01	1564.65	3868.89	5624.5	6972.73	4526.94	2185.66	2615.05	1121.63	0.00129614	0.403238	0.995437	1	1.21955	0.6773	0.31675	0.394438	0.00198635	1.25472e-09
P52789	5	2	192.39	Hexokinase-2 OS=Homo sapiens GN=HK2 PE=1 SV=2 - [HXK2_HUMAN]	18762	21612.2	17075.9	41164.8	36590.8	28664.7	17412.8	18448.8	13242.8	16107.7	22300.3	17629.1	13798.4	16132.1	14210.4	21547.3	24842.1	17785.9	17669.9	20869.3	15832.1	29172.6	33636.1	25136.6	3.69606e-08	0.14329	0.201459	0.999945	-0.640223	-0.597307	-0.203451	0.843783	0.695814	2.37429e-05
P30626	2	2	134.4	Sorcin OS=Homo sapiens GN=SRI PE=1 SV=1 - [SORCN_HUMAN]	60921.5	66946.3	49954.9	52377	69146.7	81574.2	51831.9	50416.9	40193.2	34570.8	49330.5	49690.3	53520.1	41126.1	49878.7	35996.9	53126.4	63599.8	54082.4	61433.9	52561.9	44107.3	73603.1	61144.3	1.95215e-07	0.0423873	0.287792	0.999831	-0.464646	-0.357823	-0.134833	1.37276	0.540921	7.33718e-05
Q8NHH9	2	2	45.42	Atlastin-2 OS=Homo sapiens GN=ATL2 PE=1 SV=2 - [ATLA2_HUMAN]	8522.76	7130.77	7061.79	4901.99	4856.12	7795.42	12000.9	12663.2	8213.1	4557.41	3329.71	10202.7	9432.53	9729.41	10728.1	6236.53	3313.46	9897.63	7581.52	5742.13	9504.73	3276.14	5816.36	11276.5	0.995841	1	1	1	0.339901	0.293025	0.101278	1.19223e-08	2.43455e-08	0
O60563	2	2	143.64	Cyclin-T1 OS=Homo sapiens GN=CCNT1 PE=1 SV=1 - [CCNT1_HUMAN]	12034.8	13182.8	12113.5	16898.5	13791.4	18691.9	20847.2	19064	12490.2	16439.3	14562.5	15545.8	12897.8	16657.9	11834.6	24247.2	13025	18157.5	10003.8	6803.69	18628.9	13437.9	18046.3	23165.7	9.82154e-07	0.99997	1	1	0.190436	0.159057	0.05506	1.32211e-05	6.78283e-08	0
P62304	3	2	203.27	Small nuclear ribonucleoprotein E OS=Homo sapiens GN=SNRPE PE=1 SV=1 - [RUXE_HUMAN]	78965.2	39207.3	71045.9	28340.7	26871.2	13225.5	52499	66212.5	108821	86184	59067.5	40884.7	103248	64005.8	69397.6	50061.9	48286.1	26211.2	61830.3	74281.6	54306.6	52233.9	19323.3	27154.3	5.3431e-06	0.783634	0.984534	1	0.683031	0.487395	0.166274	0.105887	0.00676929	1.2039e-07
O94925	2	2	64.13	Glutaminase kidney isoform, mitochondrial OS=Homo sapiens GN=GLS PE=1 SV=1 - [GLSK_HUMAN]	35221.6	40018.4	23930.5	61079.8	48077.7	41537.3	33570.8	35316.9	24164.8	42849.3	45366.7	26651.4	36123.9	40670.1	36968.6	50995.2	37714.2	37987.4	31092.4	35921	34336.8	44999.1	53959	43064.3	0.0241379	0.997988	1	1	-0.265122	-0.0553577	-0.0379833	0.000874814	0	0
Q8IYB8	2	2	102.21	ATP-dependent RNA helicase SUPV3L1, mitochondrial OS=Homo sapiens GN=SUPV3L1 PE=1 SV=1 - [SUV3_HUMAN]	22765.8	21342.9	23326.6	22041.3	21807.1	28724.6	18689.2	23625.9	12784.2	18237.5	15068.6	18777.7	20674.7	13363.9	18812.9	24546	16977.9	21223.1	22928.1	18284.5	26964.9	19583.2	22393.1	22508	1.31973e-06	0.713046	0.972155	1	-0.385434	-0.276388	-0.0777572	0.146883	0.0122644	2.1089e-10
O96019	2	2	54.77	Actin-like protein 6A OS=Homo sapiens GN=ACTL6A PE=1 SV=1 - [ACL6A_HUMAN]	20549	14332.1	13509.9	24419.6	22889.8	11095.1	25406.8	24427.7	31031.6	28339.4	26691.7	26538.9	22685.9	19380.8	22602.6	24066.7	18771.1	17796.7	23490.3	11006.6	22833.4	19750	21691.2	15488.6	1.95965e-07	0.689922	0.99994	1	0.605022	0.230579	0.0974693	0.1612	2.62696e-05	1.40164e-11
Q5JRX3	2	2	117.24	Presequence protease, mitochondrial OS=Homo sapiens GN=PITRM1 PE=1 SV=3 - [PREP_HUMAN]	15672.4	11179.7	14077.8	15594.1	14911.8	11793.5	19375.3	16458	16245.6	18185.5	16621.7	10283.5	24277	16613.6	24747.6	20114.9	13590.6	12670.8	10502	14309.9	14783.1	17148.8	15850.3	14962.5	0.0464805	0.999796	0.856305	1	0.223413	0.428522	0.0731239	8.87769e-05	0.0673716	4.09497e-12
Q8NBQ5	2	2	160.75	Estradiol 17-beta-dehydrogenase 11 OS=Homo sapiens GN=HSD17B11 PE=1 SV=3 - [DHB11_HUMAN]	22928.7	26264.3	22407.5	32799.9	28677	31267	25867.4	27272.5	16862.5	25560.6	18240.3	21181	24048.6	22891	26709.6	26259.5	15700.6	25732.7	27615.2	27176.2	26459.9	20728.8	31347	25109.3	3.55139e-06	0.961764	0.997555	1	-0.283931	-0.217532	-0.0528181	0.0169317	0.00106311	0
Q9Y276	2	2	127.63	Mitochondrial chaperone BCS1 OS=Homo sapiens GN=BCS1L PE=1 SV=1 - [BCS1_HUMAN]	835.698	1225.92	1244.38	506.761	1167.38	0	2721.08	1158.27	2908.95	2118.33	2237.69	574.364	1740.07	2302.19	3251.85	2387.38	1819.97	314.774	1870.79	521.825	1205.83	1269.99	1004.32	0	0.000103142	0.995204	0.996614	1	1.23455	1.24651	0.237853	0.00208784	0.00147322	0
Q8TB52	2	2	114.11	F-box only protein 30 OS=Homo sapiens GN=FBXO30 PE=1 SV=3 - [FBX30_HUMAN]	4186.96	5921.09	6827.11	4451.82	8495.17	6076.24	3940.03	3953.31	3980.72	5153.07	4571.83	6530.82	713.579	590.962	2471.18	669.47	1507.43	2539.85	7421.64	3450.18	4246.2	3464.59	6034.16	6443.94	1.51281e-14	0.999881	6.68859e-08	0.999999	-0.354231	-2.08207	-0.211238	5.17057e-05	7.17467	2.70979e-07
Q96C86	2	2	152.97	m7GpppX diphosphatase OS=Homo sapiens GN=DCPS PE=1 SV=2 - [DCPS_HUMAN]	10358	15332.6	9919.67	9296.53	13427.2	16814	16737.4	13578.6	10125.5	2392.58	3169.54	14228.6	7717.03	7888.24	11665.2	4369.23	5370.13	13357.9	12403.4	16916.9	15610	3273.09	9478.17	14226.1	0.000659145	0.871913	0.830515	1	-0.3192	-0.577235	-0.0635867	0.0595268	0.0806528	4.20438e-08
P52294	4	2	224.94	Importin subunit alpha-5 OS=Homo sapiens GN=KPNA1 PE=1 SV=3 - [IMA5_HUMAN]	14794.7	23608.9	17817.1	14255.6	16048.5	27549.9	21186.5	22836.7	18600.8	10040.9	6378.42	18766.4	17533.5	16882.3	18933.2	14367.7	10124.9	18077.1	17689.9	25271.2	17086.7	11948.6	14573.4	25020.1	5.78976e-05	0.998515	0.999959	1	-0.221931	-0.250095	-0.0317724	0.000645573	1.79047e-05	0
P62328	2	2	112.47	Thymosin beta-4 OS=Homo sapiens GN=TMSB4X PE=1 SV=2 - [TYB4_HUMAN]	32876.5	27852.4	35719.4	25300.5	24290	48286.1	29305.6	26178.4	26660	21527	20524.8	26073.1	23262.7	14690.7	27652.5	18595.7	19518.4	27670.9	29765.4	27866.2	41503.5	27670.6	27862.6	33232.7	0.00262917	0.998299	0.822082	1	-0.370926	-0.564606	-0.0484985	0.00073923	0.0850851	0
Q9BYT8	3	2	152.96	Neurolysin, mitochondrial OS=Homo sapiens GN=NLN PE=1 SV=1 - [NEUL_HUMAN]	30272.8	36026	26630.9	30528.7	29764.1	39050	29239.6	32710.2	21202.5	27137	20452.6	29269.6	24536.2	26363.1	23452.7	25903	23499.2	33837.4	29358.2	37708.1	33354.2	26717.2	30441.8	31934.3	1.75962e-06	0.924128	0.892696	1	-0.264977	-0.286963	-0.0208494	0.034268	0.0492964	0
Q14240	16	2	871.83	Eukaryotic initiation factor 4A-II OS=Homo sapiens GN=EIF4A2 PE=1 SV=2 - [IF4A2_HUMAN]	5237.4	25062.7	17902.5	3948.93	3534.19	24598.3	1994.65	17160.2	9882.04	5868.75	2422.86	13556.5	16039.5	18937.1	5585.03	7740.86	6566.58	25318.3	6928.82	23042.6	18795.6	4770.58	7051.8	18552.3	0.294695	0.999738	1	1	-0.657873	-0.00173889	-0.020675	0.000113838	9.28087e-11	5.91943e-12
Q9BUL8	2	2	89.12	Programmed cell death protein 10 OS=Homo sapiens GN=PDCD10 PE=1 SV=1 - [PDC10_HUMAN]	30007.9	33053.5	23587.1	24563.6	37934.8	43238.9	31754.9	33289.5	14976.9	22023.9	19728.2	23887.1	19851.4	21595	19864.8	15680	22291.8	21833.6	28561.8	35292.5	25811.5	35057	33765	29792.3	3.71797e-10	0.499553	0.0193532	1	-0.401392	-0.667606	-0.031122	0.301419	1.71325	0
Q96B54	2	2	87.84	Zinc finger protein 428 OS=Homo sapiens GN=ZNF428 PE=1 SV=2 - [ZN428_HUMAN]	7987.7	8130.9	5306.8	9796.77	19027.8	14635.5	6021.87	2981.99	2426.61	7311.04	5915.86	5965.31	11081.1	3123.07	3951.54	6226.84	7989.63	15378.2	3550	7228.35	8090.4	12241.2	17864.4	14439.6	1.53424e-08	0.124751	0.97647	1	-1.0833	-0.442384	-0.0330921	0.903955	0.010341	0
Q9NPD3	2	2	134.49	Exosome complex component RRP41 OS=Homo sapiens GN=EXOSC4 PE=1 SV=3 - [EXOS4_HUMAN]	22525	20032.2	18550.6	26970.4	22156.1	30455.7	26297.3	23164.4	19295.9	24444	22022.1	24306.8	17992.8	17196.8	17568	25081.2	22723	23100.3	18452.4	22285.3	23248.5	22438.9	26346.6	28301.5	2.30461e-12	1	0.99061	1	-0.0119382	-0.186115	0.00392311	0	0.00409739	0
Q8N9N8	2	2	125	Probable RNA-binding protein EIF1AD OS=Homo sapiens GN=EIF1AD PE=1 SV=1 - [EIF1A_HUMAN]	3070.35	6733.98	4245.74	6104.02	7408.84	4467.11	1610.96	3574.35	587.366	5100.86	3427.49	3250.1	1921.2	1767	1527.6	549.753	2417.05	2987.15	3216.09	4289.21	5513.41	7995.48	7171.26	5489.76	1.78524e-14	0.752572	0.117208	1	-0.867862	-1.51983	0.0722612	0.123452	0.931041	0
O75818	2	2	62.26	Ribonuclease P protein subunit p40 OS=Homo sapiens GN=RPP40 PE=1 SV=3 - [RPP40_HUMAN]	7455.36	6485.18	11313.6	10299.2	8876.25	4531.45	12787	13596	12964.8	7780.87	8887.71	9694.77	10561.2	13093.4	16332.5	20846.4	7371.68	10985.5	11907.4	5920.35	9344.91	6736.83	9974.44	3906.05	3.00763e-05	0.993779	0.804992	1	0.424504	0.693696	-0.0349268	0.00271017	0.0942085	0
P35580	11	2	488.87	Myosin-10 OS=Homo sapiens GN=MYH10 PE=1 SV=3 - [MYH10_HUMAN]	19098	19179.8	11342.4	6180.78	6166.11	14190	9396.84	13729	12251.4	11277.2	8110.4	11225.3	11640.2	13720.5	7527.13	9908.35	8585.53	11334.7	12363.6	19937	11805.4	11689.4	8201.97	14028.9	0.477851	1	1	1	-0.206728	-0.280135	0.0349849	5.78934e-13	6.3722e-08	4.00503e-09
Q9NXG2	2	2	159.76	THUMP domain-containing protein 1 OS=Homo sapiens GN=THUMPD1 PE=1 SV=2 - [THUM1_HUMAN]	32385.6	36609.4	29885.5	25096.8	30642.2	40890.4	30184	37458.8	24269.8	25682	25249	32296.6	24103.1	24056.8	26582.6	21176.3	25617	30849.3	30527	37458.2	32739.4	27636.1	37673.6	34652	0.000567271	0.99509	0.19412	1	-0.158732	-0.359521	0.0376995	0.0021378	0.711931	3.06981e-11
P61006	7	2	385.05	Ras-related protein Rab-8A OS=Homo sapiens GN=RAB8A PE=1 SV=1 - [RAB8A_HUMAN]	28398.2	23224.8	33129.1	34567.8	25032.2	23766.9	36490.3	27455.4	36635.6	32708.3	24757.4	29229	42795.1	41756	31405.8	38910.9	27883.1	29256.2	31362.1	26146.7	25678.1	27545.6	27814.5	25228.6	0.134837	0.999893	0.792993	1	0.155684	0.33463	-0.0377621	4.64767e-05	0.100731	0
O60888	2	2	86.26	Protein CutA OS=Homo sapiens GN=CUTA PE=1 SV=2 - [CUTA_HUMAN]	70246.6	68760.2	63076	16254.2	23799	58433.7	58193.5	71433.3	49438.9	23466.5	16581.5	48204.4	66690.7	55424.5	54223.5	12082.3	16623.8	59426.9	49339.6	85678.2	51617.9	17648.8	39684	63000	0.999557	1	1	1	-0.169141	-0.184586	0.0303915	0	7.97084e-10	0
P27707	2	2	85.47	Deoxycytidine kinase OS=Homo sapiens GN=DCK PE=1 SV=1 - [DCK_HUMAN]	13931.8	20023.4	14708.4	8946.45	15042.8	18193.2	12545.8	11361.1	12035.1	5026.71	8348.22	10204.6	6902.86	14175.4	12037	4437.55	7734.85	15765	14606.4	17687.5	15127.5	15201.7	17071	18018	8.5234e-05	0.230869	0.160946	1	-0.610012	-0.573372	0.105114	0.636634	0.793321	1.37966e-07
Q9C005	2	2	147.34	Protein dpy-30 homolog OS=Homo sapiens GN=DPY30 PE=1 SV=1 - [DPY30_HUMAN]	8280.95	7721.29	12375.7	12586.1	11792.6	1170.35	22160.1	8080.64	20137.1	19413.7	22157.5	10119.6	18335	15292	19680.1	15236	17766.5	4146.7	10081.5	5337.92	3641.61	9200.46	17437.4	1096.17	4.54098e-07	0.96572	0.996358	1	0.920457	0.74621	-0.204652	0.0151487	0.00158451	7.51088e-10
Q9GZU8	2	2	129.75	Protein FAM192A OS=Homo sapiens GN=FAM192A PE=1 SV=1 - [F192A_HUMAN]	21268.1	22010.2	12154.5	27459	40070.1	34842.7	25107	27643.7	16429.2	24638.6	24751.5	27842	13341.3	15419.3	16947	12579.3	27710.2	26078	27271	25247.1	19163	30471.6	34983.5	29723	0.0119405	1	0.649004	0.999997	-0.108106	-0.493673	0.0804905	0	0.187753	1.27996e-06
Q13617	3	2	73.73	Cullin-2 OS=Homo sapiens GN=CUL2 PE=1 SV=2 - [CUL2_HUMAN]	5163.48	2167.87	4171.78	13428.3	10969.8	5922.02	4216.89	3644.66	3093.89	9378.57	9186.61	3176.98	2749.33	1331.67	4986.21	8658.27	10454.4	4456.79	6195.28	4008.7	5576.25	15207	8450.72	5531	0.414408	1	0.999998	1	-0.355121	-0.35781	0.104625	1.77573e-09	9.54709e-07	2.7265e-11
P61586	6	2	312.15	Transforming protein RhoA OS=Homo sapiens GN=RHOA PE=1 SV=1 - [RHOA_HUMAN]	7586.09	14815.8	7393.14	31112.5	19932.2	17252.9	15067.2	15283.7	8835.11	21253.8	21761.1	15082.5	2345.58	12181.5	2647.96	8080.46	10616.8	6735.61	10422.6	16883.2	12434.7	29870.5	27945	15344.5	4.93467e-20	1	0.0488231	0.999998	-0.0119508	-1.20302	0.202836	5.1201e-13	1.31137	9.99417e-07
Q9NRZ9	3	2	54.29	Lymphoid-specific helicase OS=Homo sapiens GN=HELLS PE=1 SV=1 - [HELLS_HUMAN]	311.249	5955.74	5250.24	7579.2	4830.38	5679.71	5857.62	5843.31	5083.31	8018.88	7506.24	5757.28	1441.06	2583.35	2434.62	2603.23	2702.44	2127.48	3883.76	4336.64	6632.3	8276.03	3874.85	5799.32	3.39974e-08	0.365497	0.756766	0.910123	0.362612	-1.09164	0.147909	0.437116	0.121038	0.0408998
Q9Y547	2	2	95.53	Heat shock protein beta-11 OS=Homo sapiens GN=HSPB11 PE=1 SV=1 - [HSB11_HUMAN]	15909.6	24975.1	16192.6	11555.9	13353.9	14599.7	21914.2	25238	21590.9	11114.8	21064.2	20922.7	19076.9	18460	17479.8	12973.2	18059.3	19007.7	17857.5	18085.4	13413.4	14009.7	15696.3	11408.9	0.00422983	0.956235	0.999997	1	0.335147	0.121274	-0.0943663	0.0194355	1.21863e-06	4.02245e-12
Q9Y333	2	2	209.71	U6 snRNA-associated Sm-like protein LSm2 OS=Homo sapiens GN=LSM2 PE=1 SV=1 - [LSM2_HUMAN]	77712	87619.7	69977.8	65617	72821.9	90637.3	92019.7	84645.2	84532.1	61487.9	55008.9	87640.9	70584.5	69332.8	67728.2	50966	50921.5	91319	70707.5	80999.4	97920.1	47915.2	81102.3	101444	8.63132e-05	1	0.982124	1	0.00294542	-0.212254	0.047976	0	0.0078336	0
Q9Y2R9	2	2	102.27	28S ribosomal protein S7, mitochondrial OS=Homo sapiens GN=MRPS7 PE=1 SV=2 - [RT07_HUMAN]	125668	117559	113823	103343	93524.2	142635	114837	110082	104193	98624.8	110453	113809	110647	109527	93105.1	115853	118273	120025	114462	136767	123540	112181	96111.2	134133	5.69433e-09	0.999999	1	1	-0.0953623	-0.0616158	0.0421329	2.35848e-07	1.79574e-10	1.10849e-11
Q9NP92	2	2	111.02	28S ribosomal protein S30, mitochondrial OS=Homo sapiens GN=MRPS30 PE=1 SV=2 - [RT30_HUMAN]	2131.57	2450.82	3534.27	2856.74	2325.73	3616.61	5147.84	3703.12	2231.05	1078.05	2886.9	4560.16	4165.86	4743.52	4610.84	4715.37	2676.86	5408.1	4527.27	2031.65	4373.97	1315.89	1374.42	787.899	0.00773489	1	0.993516	0.999696	0.213012	0.637823	-0.231187	0	0.00282504	0.000132126
P17480	2	2	97.38	Nucleolar transcription factor 1 OS=Homo sapiens GN=UBTF PE=1 SV=1 - [UBF1_HUMAN]	28396	16855.1	22353.9	37076.9	26672.9	48654.7	35654.8	37285.6	23301.1	41251	23269.4	27793.5	20982.1	14811.8	21800.2	35055.8	18147.9	23994.9	28958.1	37405.4	29597.4	33672.2	26725.1	37154.4	5.93842e-11	1	0.624285	0.999743	0.0669168	-0.417329	0.104355	2.12201e-07	0.204617	0.000111629
O60220	2	2	76.35	Mitochondrial import inner membrane translocase subunit Tim8 A OS=Homo sapiens GN=TIMM8A PE=1 SV=1 - [TIM8A_HUMAN]	25831.8	29676.3	23199.4	38536.9	31288.6	34607.2	25231.6	29536.6	18469.7	42718.6	27324.2	21717.5	32929.9	31697.4	26698.2	55843.8	30912.3	35682.5	25126.4	33937.9	29950.2	30765.2	39124.8	21502.3	2.46195e-06	0.999785	0.999171	1	-0.150497	0.223072	-0.0216936	9.31967e-05	0.000360384	0
P19388	2	2	178.39	DNA-directed RNA polymerases I, II, and III subunit RPABC1 OS=Homo sapiens GN=POLR2E PE=1 SV=4 - [RPAB1_HUMAN]	54326.1	45366.8	43886.8	17371.9	18222.8	37782.6	47805.9	60999	41602.8	28185.8	19729.7	43174.1	51227	48985.1	46467.4	29333.5	20034.8	41697.5	52962.5	42644.9	41740.5	18219.7	16914.1	29891.5	0.986151	1	1	1	0.154598	0.132008	-0.100391	6.55167e-08	4.51959e-08	5.9499e-13
Q9NU22	3	2	148.72	Midasin OS=Homo sapiens GN=MDN1 PE=1 SV=2 - [MDN1_HUMAN]	1316.92	1011.16	2727.03	1462.42	1978.91	1025.46	3205.66	2289.19	3213.74	3603.93	1897.83	1943.05	3868.55	2615.56	3233.21	2425.81	1615.03	1588.9	2094.25	469.409	1290.19	336.967	1022.5	1167.53	0.00147653	0.729279	0.886578	0.852794	0.762518	0.688642	-0.5775	0.137106	0.0522832	0.0691559
Q9Y6W5	2	2	109.55	Wiskott-Aldrich syndrome protein family member 2 OS=Homo sapiens GN=WASF2 PE=1 SV=3 - [WASF2_HUMAN]	3325.85	1598.8	3653	3638.47	3080.23	980.087	6455.91	4818.2	3830.66	1758.83	3880.1	3681.74	6757.95	4007.56	5650.19	4355.04	4577.99	3283.98	1967.48	779.623	2398.04	2523.66	2754.02	183.075	3.29031e-06	1	0.999995	0.999995	0.5856	0.81488	-0.617917	7.43728e-09	2.37088e-06	2.1168e-06
Q6DD88	3	2	115.45	Atlastin-3 OS=Homo sapiens GN=ATL3 PE=1 SV=1 - [ATLA3_HUMAN]	16381.5	11929.7	15692.4	15218.8	12111.1	12426.3	16075	13480.7	16544.6	17720	16444.4	13256.6	16935.8	15783.1	20781.3	14715.3	16097.7	15326.3	15105.4	9213.05	13435.6	11537.1	16096.1	8343.26	4.06668e-10	1	0.999979	0.999998	0.159036	0.250457	-0.183998	1.2162e-08	9.33084e-06	7.29035e-07
Q13620	2	2	118.57	Cullin-4B OS=Homo sapiens GN=CUL4B PE=1 SV=4 - [CUL4B_HUMAN]	14219.8	27097.9	11118.5	14402.4	13781	20559.2	15455.4	21875.8	18857	6961.45	12064.2	9934.25	22024.7	13473.2	16772.1	12035.3	9072.14	17137.1	23284.9	37464.9	17213.8	11597.9	14461.2	12071.7	4.60506e-05	1	1	1	-0.248861	-0.160687	0.198392	1.56463e-09	0	0
O95218	2	2	104.25	Zinc finger Ran-binding domain-containing protein 2 OS=Homo sapiens GN=ZRANB2 PE=1 SV=2 - [ZRAB2_HUMAN]	22195.9	20366.2	11077.9	13534.8	9464.89	26597.4	14660.6	17800.8	8552.18	13366.3	8360.69	15107.8	10167.9	13246.5	8951.45	17625.5	13627.2	19566	19032	26555.9	17030.6	16362	24684.3	28461	0.000203653	0.987235	0.999678	0.947172	-0.407223	-0.311572	0.355952	0.00557964	0.000139818	0.0235713
Q96ER3	2	2	122.33	Protein SAAL1 OS=Homo sapiens GN=SAAL1 PE=1 SV=2 - [SAAL1_HUMAN]	20030.3	25547.6	12552.1	6239.8	11783.5	24212.5	24826.1	37040.2	10404.1	7809.01	6995.52	21059.9	15174.9	22558.4	11014	5266.73	6060.72	18953.6	15213.3	29910.1	17875.2	9938.44	12948.9	23074.1	0.940795	1	0.999985	1	0.107563	-0.344825	0.118532	0	6.6104e-06	4.1942e-11
Q9H2J4	2	2	104.79	Phosducin-like protein 3 OS=Homo sapiens GN=PDCL3 PE=1 SV=1 - [PDCL3_HUMAN]	18063.7	27089.4	21056.6	17380.2	17681.3	32353.4	18810.2	20425.6	10525.8	20491.6	15954.7	16808.6	21023.1	26184.5	23110.8	17918.3	18441.1	28005.8	24867.5	31671.2	21865.2	18913	23346.3	37170.6	2.03818e-06	0.76168	1	0.99215	-0.375311	0.0113881	0.24022	0.118227	0	0.00342264
P53990	2	2	67.36	IST1 homolog OS=Homo sapiens GN=IST1 PE=1 SV=1 - [IST1_HUMAN]	3953.84	5880.29	4920.38	3158.42	3087.58	1769.75	4733.76	3988.67	3608.53	2415.92	3694	3444.55	7512.54	8398.78	5750.06	3027.52	4396.07	4989.16	5653.13	3423.46	1591.1	2923.11	3708.93	540.948	0.000954919	1	1	1	-0.0571795	0.581527	-0.35198	0	2.05834e-08	1.01472e-08
Q6PI48	2	2	79.56	Aspartate--tRNA ligase, mitochondrial OS=Homo sapiens GN=DARS2 PE=1 SV=1 - [SYDM_HUMAN]	5739.15	6986.74	7127.74	6322.53	5538.34	7706.63	7446.22	8148.66	7132.44	7393.69	6535.42	8609.31	5683.71	7164.66	7123.48	7160.49	4631.02	5959.5	6385.08	7397.13	6039.35	5466.17	4029.91	7474.08	0.176094	0.999284	1	1	0.199451	-0.0635294	-0.099588	0.000311173	4.49282e-11	1.61588e-07
Q7Z7H8	2	2	89.31	39S ribosomal protein L10, mitochondrial OS=Homo sapiens GN=MRPL10 PE=1 SV=3 - [RM10_HUMAN]	6343.49	5781.91	10682.9	5798.37	6337.83	46.6282	11873.7	5871.62	11573.7	7746.47	9473.88	5232.62	9915.69	9515.4	12876.4	11058.5	7967.19	1848.4	8000.58	0	2810.67	4022.23	4193.33	15.7613	0.00325093	0.999702	0.999891	0.742433	0.565181	0.603937	-0.877763	0.000129229	4.71449e-05	0.129343
O95400	2	2	133.54	CD2 antigen cytoplasmic tail-binding protein 2 OS=Homo sapiens GN=CD2BP2 PE=1 SV=1 - [CD2B2_HUMAN]	13725.6	20371.6	13570.9	14380.7	16377.6	22183.2	22879.8	18474.4	15810.9	15026.1	10869.9	16078.2	11677	14954.1	14049.8	15331.1	11331.2	22253.7	19950	22057	16714.3	8720.37	20166.3	24110.4	0.0037521	1	0.999996	1	-0.0212388	-0.167247	0.151098	0	1.77949e-06	9.30077e-10
O15397	2	2	107.52	Importin-8 OS=Homo sapiens GN=IPO8 PE=1 SV=2 - [IPO8_HUMAN]	21910.7	22792.5	21608.2	25097.7	22687.4	21504.6	20861.7	18378.3	16440.9	36190.9	26813.7	16834.7	11803.9	13916.1	15796.8	24684.3	15887	13338	25952.2	38344.6	27132.8	38955.4	28724.4	23563.3	3.23664e-11	1	0.609899	0.944135	-0.000860447	-0.506912	0.429894	0	0.214742	0.0249659
Q9UBL3	2	2	140.02	Set1/Ash2 histone methyltransferase complex subunit ASH2 OS=Homo sapiens GN=ASH2L PE=1 SV=1 - [ASH2L_HUMAN]	15376.1	9679.27	10486.7	6177.35	5418.42	9703.13	14319	12288.5	12210.3	7398.53	5552.6	11016.1	9674.77	7981.48	8788.55	8596.8	4517.78	8575.76	15408.4	13343	9358.57	4566.35	7369.02	10188.2	0.337285	1	1	1	0.14349	-0.23984	0.0836382	7.19539e-09	2.04642e-07	0
Q8N201	3	2	85.04	Integrator complex subunit 1 OS=Homo sapiens GN=INTS1 PE=1 SV=2 - [INT1_HUMAN]	3976.06	2420.99	2664.33	4556.99	4861.01	4704.08	6186.29	6478.92	2831.43	8515.33	3340.42	3607.1	1507.27	3573.13	3723	4238.42	2772.32	2964.65	2388.65	1462.2	4960.67	4490.7	4537.38	3763.79	0.0255562	0.999549	0.999866	1	0.417286	-0.303991	-0.101838	0.000196043	5.8327e-05	3.45513e-09
Q9BT22	2	2	63.46	Chitobiosyldiphosphodolichol beta-mannosyltransferase OS=Homo sapiens GN=ALG1 PE=1 SV=2 - [ALG1_HUMAN]	2613.34	2725.29	4511.22	3058.05	2669.22	740.729	4155.45	3936.57	2876.29	5262.07	2143.77	2242.19	2565.87	4739.69	5711.67	4007.71	2171.1	2021.65	2906.61	1124.26	2054.74	2876.38	1345.35	58.7522	0.000904015	1	1	0.998676	0.337337	0.378817	-0.654578	2.98755e-10	3.77565e-10	0.000575312
Q12789	2	2	45.36	General transcription factor 3C polypeptide 1 OS=Homo sapiens GN=GTF3C1 PE=1 SV=4 - [TF3C1_HUMAN]	6024.91	6374.5	9993.74	2419.55	3791.26	947.67	8180.14	3832.45	9948.94	9064.08	6706.71	3722.11	9390.92	6191.38	7120.98	5695.85	3777.15	1989.23	7281.9	2194.09	2297.38	3321.69	3230	560.873	0.000593154	0.999971	1	0.999995	0.488289	0.209303	-0.645926	1.26151e-05	1.28377e-09	2.35361e-06
Q9UN86	3	2	206.97	Ras GTPase-activating protein-binding protein 2 OS=Homo sapiens GN=G3BP2 PE=1 SV=2 - [G3BP2_HUMAN]	35432.2	33332.7	25975.3	22208.1	24380.2	11882.5	27665.5	27592.3	24551.1	19661.4	21700.9	22227.7	41747.6	39825.6	32442.1	33331.8	22932.8	28914.1	30368.7	20299.5	18960.9	17285.3	24324	13753.5	5.11102e-13	1	0.767681	0.997791	-0.0954856	0.378654	-0.293686	0	0.114819	0.000960494
Q9H1A4	2	2	91.11	Anaphase-promoting complex subunit 1 OS=Homo sapiens GN=ANAPC1 PE=1 SV=1 - [APC1_HUMAN]	4793.49	4258.22	3946.01	3254.18	3628.52	5400.41	5165.02	5400.75	4846.08	3356.59	3878.87	4917.57	4089.06	5046.43	5352.77	4467.63	3347.56	4829.13	3674.17	2177.27	4049.4	2681.03	3206.22	5211.63	0.0217314	1	1	0.99648	0.124788	0.101983	-0.267673	5.55409e-09	3.63479e-10	0.00153122
Q9Y3B8	2	2	134.82	Oligoribonuclease, mitochondrial OS=Homo sapiens GN=REXO2 PE=1 SV=3 - [ORN_HUMAN]	10717.2	7498.4	11541.7	4531.59	7780.49	289.393	11158.1	9040.31	11177.4	9055.64	8073.98	5067.67	12693.3	10128.4	11728.5	5576.71	6348.82	2848.02	8877.04	3647.8	3763.1	6262.1	3542.89	185.37	0.000304695	0.999808	0.999998	0.999994	0.338848	0.219619	-0.688789	8.34973e-05	1.03988e-06	2.39617e-06
Q14919	2	2	136.9	Dr1-associated corepressor OS=Homo sapiens GN=DRAP1 PE=1 SV=3 - [NC2A_HUMAN]	17996.9	20520.8	13411.2	13226.3	13160.5	17059	16850.3	20233.2	14180.5	12748.4	12898.9	13183.7	13997.2	16985.9	12334.4	13162.1	9709.19	12535.9	22237.8	32752.9	21987.5	13177.2	20144	20452.9	0.207611	1	0.999996	0.998544	-0.082162	-0.27679	0.455158	0	1.56e-06	0.000632959
P63172	2	2	71.92	Dynein light chain Tctex-type 1 OS=Homo sapiens GN=DYNLT1 PE=1 SV=1 - [DYLT1_HUMAN]	10124.5	9110.89	7471.56	16597.6	14692.8	12935	9421.54	9950.47	7984.62	16253.9	14723.1	11838.6	6834.92	7529.79	5787.59	11532.1	15692	8175.2	13538.6	17478.4	16397.2	21080.5	13964.4	15886.5	9.47167e-08	1	0.870429	0.441579	-0.0155431	-0.352615	0.471416	0	0.0602666	0.354991
O14562	2	2	99.39	Ubiquitin domain-containing protein UBFD1 OS=Homo sapiens GN=UBFD1 PE=1 SV=2 - [UBFD1_HUMAN]	52383.6	58349.1	39751.5	34268.9	28572	59821	47288.7	61843.3	38467	36795.9	32237.5	52415.9	41382	45965.8	41853.4	38897.8	23430.8	52458.9	46700.9	66956.1	56353.9	39264.2	48528.9	64067.1	0.0284417	1	1	0.999348	-0.0218077	-0.162858	0.236811	0	8.55631e-08	0.000283402
Q99538	2	2	74.99	Legumain OS=Homo sapiens GN=LGMN PE=1 SV=1 - [LGMN_HUMAN]	27911.8	25888.2	16138.8	10568.2	11444.5	12630.1	28137.1	29492.3	11380.5	14650.2	12748.5	16183.6	32336.5	38675.2	26611.7	34203.4	12478.8	24334.9	13205.1	9419.2	10407.6	3525.21	6367.66	8489.73	0.000584134	1	0.683522	0.10648	0.10648	0.689323	-1.02438	6.05188e-12	0.165248	0.972731
Q7LBC6	2	2	102.28	Lysine-specific demethylase 3B OS=Homo sapiens GN=KDM3B PE=1 SV=2 - [KDM3B_HUMAN]	4898.25	5227.96	4887.8	5187.48	4765.38	5979.33	8371.42	6760.47	7291.36	3535.55	3934.33	6946.62	8329.84	6907.49	8648.23	3347.88	4522.04	8470.57	3058.58	1436.34	3886.91	1380.09	4365.16	3264.66	0.0947659	1	1	0.878598	0.251501	0.378367	-0.83136	9.779e-12	2.18958e-08	0.0562096
Q8NFH3	2	2	144.25	Nucleoporin Nup43 OS=Homo sapiens GN=NUP43 PE=1 SV=1 - [NUP43_HUMAN]	26995.7	31745.6	20374.6	25020.2	21486.7	42457.2	33111.4	33070.1	25490.9	29275.4	25863.2	36326.1	21595.7	23684.1	26723	24574.3	18542.7	26582.6	30064.2	36648.5	26639.4	28882.9	25935.4	39883.1	0.00395417	0.999788	0.992763	0.99786	0.123777	-0.246283	0.161996	9.20924e-05	0.0031543	0.000930552
Q9NWU2	2	2	106.43	Glucose-induced degradation protein 8 homolog OS=Homo sapiens GN=GID8 PE=1 SV=1 - [GID8_HUMAN]	8398.91	9021.85	12273.5	2183.66	4025.11	2936.66	9907.4	6407.42	10403	13009.8	7243.68	1959.11	8622.89	6392.51	12483.4	6206.7	5532.6	1075.4	9012.54	3934.02	4077.47	6217.75	2250.06	1495.96	2.96035e-05	1	1	1	0.3332	0.0537301	-0.525224	4.08984e-10	0	1.96171e-08
O00148	14	2	594.5	ATP-dependent RNA helicase DDX39A OS=Homo sapiens GN=DDX39A PE=1 SV=2 - [DX39A_HUMAN]	21141.5	12907.9	25330.6	8229.23	10647.4	6775.56	10527.9	10984.8	26962.3	19943.5	14376	12763.9	31149.7	17082.3	15752.2	13527.6	15334.1	11473.9	13287.6	8384.81	13548.1	6694.3	6224.2	6394.17	7.1789e-09	1	0.999891	0.988751	0.168374	0.294932	-0.640876	8.10754e-08	4.71288e-05	0.00491303
Q9HC36	2	2	82.29	RNA methyltransferase-like protein 1 OS=Homo sapiens GN=RNMTL1 PE=1 SV=2 - [RMTL1_HUMAN]	18097.2	20282.4	5511.01	34170	17891	26137.1	13787	24219.5	7141.35	36089.8	18854.6	23283.4	7085.79	9775.29	14878	14254.6	18780.1	26504.9	12188.3	34562	31006.4	32736.9	34594.1	38552.4	6.97753e-05	1	0.996229	0.454337	0.0151259	-0.419581	0.58895	0	0.00164081	0.342622
Q9NZB2	2	2	115.98	Constitutive coactivator of PPAR-gamma-like protein 1 OS=Homo sapiens GN=FAM120A PE=1 SV=2 - [F120A_HUMAN]	13903.4	13506.4	14269	7924.83	10390.2	8666.63	10415.9	12007	12628.8	8598.9	11494.5	10101.2	14674.4	12767	15366.4	14736.4	16428.2	11700.3	8788.15	11552	9355.36	6685	7288.09	9763.55	1.30651e-10	1	0.921047	0.924262	-0.0735806	0.319357	-0.361769	0	0.0357184	0.034205
Q92522	2	2	157.64	Histone H1x OS=Homo sapiens GN=H1FX PE=1 SV=1 - [H1X_HUMAN]	25806.9	19148.4	16227.5	17306.3	11908.3	25711.2	29550.5	30556.8	34466.6	38691.1	32639.2	43186.6	7361.38	6796.15	3929.92	7958.4	9511.01	3974.85	40117.2	61471.9	39238.1	25211.2	29387.4	51188.7	6.24817e-31	0.00341196	1.52887e-09	9.63198e-05	0.848656	-1.55439	1.08678	2.467	8.81563	4.01628
Q9NQT4	3	2	160.59	Exosome complex component RRP46 OS=Homo sapiens GN=EXOSC5 PE=1 SV=1 - [EXOS5_HUMAN]	15710.6	15124.1	17159.4	15781.8	11986.9	14402.2	18721.4	15823.3	14224.3	18697.1	17410	16406.5	20066.4	15801.9	21062	15464.7	12981.8	20081.7	12454.5	8699.57	9440.47	9745.56	12917.9	3808.37	7.86963e-06	1	1	0.846824	0.167745	0.226036	-0.659928	2.59649e-10	9.79032e-09	0.0722067
Q9Y4Z0	2	2	101.86	U6 snRNA-associated Sm-like protein LSm4 OS=Homo sapiens GN=LSM4 PE=1 SV=1 - [LSM4_HUMAN]	19703.8	12016.3	21814.8	20913.7	21747.8	14014.5	20454.4	17128.7	19660.4	20705.5	23934.3	21285.3	21689.7	15100.2	20807.1	18976.6	18610.1	17493.2	14517.5	6650.98	17814.5	13820.9	23588	11162.1	7.97028e-05	1	1	0.999857	0.160369	0.0319256	-0.332022	9.10724e-10	0	6.22509e-05
P35270	2	2	207.86	Sepiapterin reductase OS=Homo sapiens GN=SPR PE=1 SV=1 - [SPRE_HUMAN]	10571.6	11033.2	15149.7	9138.09	13218.2	654.666	11481.4	7673.22	10071.9	8501.39	9269.83	6227.36	20308.7	16287.7	21563.7	13167.1	14669.4	7163	8108.55	4211.98	3854.67	7699.53	8861.7	263.176	9.14031e-05	1	0.998392	0.999043	-0.167205	0.640393	-0.856863	1.4801e-12	0.000699058	0.000415672
Q9Y6A4	2	2	102.56	UPF0468 protein C16orf80 OS=Homo sapiens GN=C16orf80 PE=1 SV=1 - [CP080_HUMAN]	4782.48	3372.83	6203.89	2623.83	2777.55	241.695	5653.98	2987.19	6336.19	4180.16	3054.27	1898.14	7148.37	4435.31	5538.21	3101.17	3396.09	1199.49	3027.73	671.506	1579.36	1280.08	2087.33	65.2649	0.000101883	1	1	0.999846	0.269464	0.31126	-1.19921	7.18297e-10	2.72616e-10	6.6718e-05
Q96JB5	2	2	138.42	CDK5 regulatory subunit-associated protein 3 OS=Homo sapiens GN=CDK5RAP3 PE=1 SV=2 - [CK5P3_HUMAN]	7543.51	6466.17	2145.77	27257.8	15237.7	6654.38	7412.24	6751.8	6414.49	14786.4	20211.4	7651.62	6744.15	4295.69	8070.42	10160.6	19968.9	9940.9	9582.72	12307.8	6033.44	31402.7	18570.2	9406.18	0.967516	1	1	0.961617	-0.0466385	-0.142074	0.418832	2.33589e-08	5.95858e-13	0.0169979
Q4G176	2	2	96.59	Acyl-CoA synthetase family member 3, mitochondrial OS=Homo sapiens GN=ACSF3 PE=1 SV=3 - [ACSF3_HUMAN]	4194.57	3764.98	3659.95	5524.89	4736.22	2632.84	4307.5	4416.41	1927.81	2935.63	2480.53	3620.75	6416.92	4438.2	8363.16	8154.47	4882.58	8038.85	2356.99	1085.86	3479.52	1461.18	2521.19	1006.14	0.000177903	1	0.993618	0.677788	-0.316211	0.716998	-1.04129	1.32585e-07	0.00278048	0.168906
P17931	3	2	112.92	Galectin-3 OS=Homo sapiens GN=LGALS3 PE=1 SV=5 - [LEG3_HUMAN]	13137.2	6862.11	8050.9	14274.6	9381.57	11364.5	7713.8	6657.95	8488.32	6081.46	8188.33	7857.5	13206.6	14209.3	6764.79	17209.3	21078.1	12689	11987.4	15677	7852.42	14090.9	11477.6	8645.8	8.09932e-15	0.744705	0.87666	0.999999	-0.487453	0.433155	0.144828	0.128016	0.0571689	4.52604e-07
Q16222	2	2	126.53	UDP-N-acetylhexosamine pyrophosphorylase OS=Homo sapiens GN=UAP1 PE=1 SV=3 - [UAP1_HUMAN]	3676.72	5374.47	3282.46	2546.61	3986.9	4752.34	2631.34	3105.36	2082.4	3126.36	2966.77	2895.78	6042.13	5863.14	7012.94	4697.08	6809.04	5996.61	1224.52	1857.06	3894.44	2960.58	4070.21	4335.81	7.82325e-10	0.989971	0.811271	0.990626	-0.49083	0.62479	-0.364778	0.00437754	0.090834	0.00409039
P27144	2	2	107.5	Adenylate kinase 4, mitochondrial OS=Homo sapiens GN=AK4 PE=1 SV=1 - [KAD4_HUMAN]	11292	15122.3	10877.4	15658.6	13459.5	14628.5	12677.3	14635	10763.7	13639.5	10252.1	11464	14641.7	14942.9	16680.9	16664	13159.2	15095.5	12168.9	14521.6	16186.8	12944.8	8725.81	12004.6	9.9747e-09	1	0.999999	1	-0.142205	0.170179	-0.0821553	8.20792e-09	3.9339e-07	1.25307e-11
P49903	2	2	106.24	Selenide, water dikinase 1 OS=Homo sapiens GN=SEPHS1 PE=1 SV=2 - [SPS1_HUMAN]	17902.2	19245.7	12013.5	18618.1	19012.2	18826.5	19618.3	26773.7	17310.7	16548.9	18970.9	20496.3	15202.6	15665.5	11152	13347.6	12169	19610.7	18897.7	19856.2	21484.1	18954.6	25278.8	25229.2	3.71857e-09	0.998499	0.876665	0.808783	0.18079	-0.277333	0.296325	0.000652455	0.0571665	0.0921678
Q8NFF5	2	2	92.57	FAD synthase OS=Homo sapiens GN=FLAD1 PE=1 SV=1 - [FAD1_HUMAN]	5518.07	5529.91	9999.56	4207.79	5079.37	2372.14	6439.61	6841.87	6378.26	3671.63	3994.19	3973.98	8759.86	7345.25	11828.7	4505.52	4983.95	6805.96	3256.67	1913.06	2214.53	2282.55	3197.75	1028.36	6.97559e-09	1	0.999954	0.626779	-0.0634504	0.435407	-1.23524	0	2.00073e-05	0.202886
P18077	2	2	74.64	60S ribosomal protein L35a OS=Homo sapiens GN=RPL35A PE=1 SV=2 - [RL35A_HUMAN]	126353	120363	97934.8	53043	48236.3	141705	118209	112693	113726	40918.3	57208.5	133246	105884	145910	79008.6	50811.8	66022.7	117092	131437	177677	151875	62904.4	51358.4	147131	2.42587e-06	1	1	0.99998	-0.028849	-0.0573607	0.297841	0	0	8.81553e-06
Q5JVF3	2	2	95.12	PCI domain-containing protein 2 OS=Homo sapiens GN=PCID2 PE=1 SV=2 - [PCID2_HUMAN]	18919.5	18606.9	13883.8	25100.7	26042.4	26513.3	20810.9	24040.7	16396.8	30360.1	16443.1	25465.6	14614.1	18522.4	17767.1	24387.3	19545.5	22195.3	26118.5	29033.2	24474.3	26264.3	26436.1	30501.9	1.41245e-08	1	0.999992	0.50131	0.048909	-0.141216	0.335235	2.37948e-12	3.46732e-06	0.299893
Q9NXE4	2	2	66.41	Sphingomyelin phosphodiesterase 4 OS=Homo sapiens GN=SMPD4 PE=1 SV=2 - [NSMA3_HUMAN]	13077.1	12530.6	10618.2	20085.1	20143.3	18589	14317.8	8470.8	12832.2	27442.6	18685	15322.1	12700.3	14495.6	17064.4	19035.1	14652.7	13749.8	11558.3	11307.3	16853.2	27675.3	19179.7	17897.6	0.00819149	1	1	1	0.0304484	-0.0516943	0.136449	0	0	3.29567e-08
Q9NYY8	2	2	71.31	FAST kinase domain-containing protein 2 OS=Homo sapiens GN=FASTKD2 PE=1 SV=1 - [FAKD2_HUMAN]	10630.3	14082.7	13221	17930.7	12561.9	11948.2	12794.8	13713.9	10377.5	17299.1	12170.8	11904.4	11452.8	16062.9	15291.4	18378.3	12492.6	12659.7	7893.57	10636	9536.44	10148.6	12547.6	9073.13	0.000905093	1	1	0.615822	-0.0384583	0.103246	-0.425746	0	1.27017e-08	0.210545
Q13619	2	2	123.34	Cullin-4A OS=Homo sapiens GN=CUL4A PE=1 SV=3 - [CUL4A_HUMAN]	11217.4	8709.22	6450.19	8909.52	9853.76	12715.1	13268.6	10962.7	5850.31	9755.33	7324.84	10244.8	7411.13	8032.59	9656.12	7753.36	12480.3	12422.6	7045.76	9045.92	11647.3	10227.2	14036.4	10805.9	0.000214118	1	1	1	-0.0112314	-0.00247358	0.118512	0	0	1.6476e-10
P21964	2	2	107.45	Catechol O-methyltransferase OS=Homo sapiens GN=COMT PE=1 SV=2 - [COMT_HUMAN]	13301.5	12533	16634.7	8505.34	9545.05	3707.86	9766.54	11664.3	13222.8	13015.9	9289.61	6736.36	15763	12162.3	18921.4	8155.73	8840.68	6330.64	9658.11	4709.44	4610.15	5228.3	5012.91	2500.31	3.13337e-05	1	1	0.381438	-0.012	0.127741	-1.01783	0	2.15296e-10	0.418576
P62310	2	2	83.34	U6 snRNA-associated Sm-like protein LSm3 OS=Homo sapiens GN=LSM3 PE=1 SV=2 - [LSM3_HUMAN]	46610.2	50147.4	40116.4	44929.4	50801.1	55709.1	52891.7	59031.5	45500.4	52198.2	45774.7	50582	44845.5	44533	38626.5	45416.7	44697	47088.7	57839.9	66453.3	62963.4	54480.4	65494.7	61944	1.11478e-17	0.999975	0.999013	0.0289668	0.0857926	-0.120517	0.356669	1.09995e-05	0.000429008	1.5381
P78406	2	2	91.63	mRNA export factor OS=Homo sapiens GN=RAE1 PE=1 SV=1 - [RAE1L_HUMAN]	11706.3	13101.7	7193.32	15915.6	12806.7	16877.5	10593	23233.3	12053.6	13462.6	10704.6	19121.2	10363.4	11610.4	6965.23	17642.3	5421.94	15225.9	10235.4	14966.3	13221	11657.2	14264	17953.4	9.16071e-07	0.999982	0.997065	1	0.200456	-0.206988	0.0847681	7.83062e-06	0.00127632	3.93e-09
Q9Y606	2	2	101.06	tRNA pseudouridine synthase A, mitochondrial OS=Homo sapiens GN=PUS1 PE=1 SV=3 - [TRUA_HUMAN]	10488.2	10265.7	11861.2	19667	16416.5	11119.5	11694.9	13321.8	12622.4	12881.5	13785.3	13182.4	11506.5	13548	14642.6	17183.4	13884.2	12019.7	8851.42	6766.01	9329.19	9771.19	11947.7	8568.57	0.0533924	1	1	0.48833	-0.0427385	0.0526433	-0.531156	0	1.04877e-10	0.311287
Q8WWY3	3	3	115.62	U4/U6 small nuclear ribonucleoprotein Prp31 OS=Homo sapiens GN=PRPF31 PE=1 SV=2 - [PRP31_HUMAN]	25000.4	27365.3	28167.6	14127.2	14357.7	21254.9	23784.1	28454.2	26375.1	25990.3	19571.3	22517.3	21112.6	21993.8	20242.3	17963.2	12519.4	20073.7	21146	14921.4	14188	14057	10587.1	17939.8	2.33761e-05	0.999204	0.999984	0.494579	0.171256	-0.193707	-0.488729	0.000345937	6.74206e-06	0.305764
P40763	3	3	127.22	Signal transducer and activator of transcription 3 OS=Homo sapiens GN=STAT3 PE=1 SV=2 - [STAT3_HUMAN]	5628.16	8215.47	7439.86	5444.33	11021	12349.8	6510.83	7474.41	2467.37	3246.7	3116.68	4918.2	19278.9	11886.4	17502	7213.46	14417.6	15080.2	4289.51	5530	3208.44	7734.51	3945.04	3854.71	3.19942e-15	0.504469	0.765138	0.701429	-0.853105	0.769104	-0.810663	0.297166	0.11626	0.154016
P25325	3	3	193.45	3-mercaptopyruvate sulfurtransferase OS=Homo sapiens GN=MPST PE=1 SV=3 - [THTM_HUMAN]	34125.1	37660.4	33579.5	23281.9	23092.1	33680.1	31206.6	31718.9	24543.2	18467.1	18751.1	26532.6	42876.2	40821.7	40816.6	22958.4	22521.5	44563.3	25911.8	16584.8	18374.3	11654.1	16462.9	19522	0.000125985	0.999927	1	0.473083	-0.294145	0.210576	-0.772962	3.18952e-05	1.39672e-08	0.325063
P55957	3	3	109	BH3-interacting domain death agonist OS=Homo sapiens GN=BID PE=1 SV=1 - [BID_HUMAN]	18954.7	17315.6	16287.8	9266.1	13046.1	8738.75	17081.9	12938.5	12163.5	8539.15	7926.6	10632.1	20873	17328.2	18849	8998.53	12515.4	17816.6	14659.7	13282.1	9584.59	8089.06	6922.58	4316.08	6.00637e-06	0.999999	1	0.967169	-0.271181	0.205086	-0.556392	2.44578e-07	1.25789e-08	0.0144978
P52434	3	3	172.97	DNA-directed RNA polymerases I, II, and III subunit RPABC3 OS=Homo sapiens GN=POLR2H PE=1 SV=4 - [RPAB3_HUMAN]	161161	137405	165594	35943.6	34833.5	41268.6	160155	105870	128580	38686.9	46791.7	46231.4	170004	115839	182643	47503.4	43111.6	55767.7	117928	109394	98299.8	58463.5	47150.9	40769.1	0.01521	1	1	1	-0.130659	0.0936934	-0.28778	0	1.58013e-08	0
Q9UHI6	3	3	118.26	Probable ATP-dependent RNA helicase DDX20 OS=Homo sapiens GN=DDX20 PE=1 SV=2 - [DDX20_HUMAN]	21175.1	18960.9	22895.8	17061.2	22266.5	20434.7	19246.9	12421	24349.2	14286.8	20696.3	18914.7	20239.4	16178	25718.3	18866.1	26848.5	20797.1	10915.5	9761.75	16623.7	18314.2	14128.3	15551.2	1.63754e-05	0.999881	1	0.216918	-0.159856	0.0671807	-0.525714	5.1608e-05	0	0.663705
Q8IX12	4	3	203.16	Cell division cycle and apoptosis regulator protein 1 OS=Homo sapiens GN=CCAR1 PE=1 SV=2 - [CCAR1_HUMAN]	25472.2	25134.3	15245.4	41732.9	30150.4	31803.7	33660.5	33148.6	21382.3	46664.4	28511.3	31464.8	18408.1	25316.1	25722.6	30395.7	23673.2	27648.5	29903.6	29142.9	33546.2	35535.3	33228.9	29515.9	2.05792e-05	0.999399	1	0.999217	0.200614	-0.1655	0.170995	0.000261258	2.45595e-08	0.000340112
Q8NAV1	3	3	154.56	Pre-mRNA-splicing factor 38A OS=Homo sapiens GN=PRPF38A PE=1 SV=1 - [PR38A_HUMAN]	21862.3	25680	13505.7	30550.1	26745.6	24870.4	14145	23271.5	21839.6	33714.4	31662.1	30244.2	25708.1	20324.3	17494.3	23586.9	30596	26164	21767.4	38415.9	42969.1	41085.2	27131.3	37239.9	0.0016138	1	1	0.278438	0.112946	0.00662728	0.542626	2.04343e-09	0	0.555272
P48507	3	3	140.85	Glutamate--cysteine ligase regulatory subunit OS=Homo sapiens GN=GCLM PE=1 SV=1 - [GSH0_HUMAN]	31965.2	39433.6	24356.6	32195.4	29292.3	33871.7	70376.7	81230.6	53990.9	47224	55788	67485.9	21948.7	24127.5	15278.8	17233.4	20030.5	22090.7	61000.3	82057.6	58405.3	67384.4	86475	82870.4	1.35857e-31	2.47162e-06	0.00593458	3.58322e-09	0.976662	-0.6629	1.19713	5.60702	2.22661	8.44573
Q6P2E9	4	3	215.19	Enhancer of mRNA-decapping protein 4 OS=Homo sapiens GN=EDC4 PE=1 SV=1 - [EDC4_HUMAN]	21608.9	28711.5	21558.4	14040.8	14310.1	22697.8	19197	21695.3	20994.8	17949.9	14747.4	19521.8	22541.2	26315.5	23023.7	16655.5	14034.8	17211.8	17905.7	14264.3	14174.3	14501.6	11746	14478	0.0894773	1	1	0.779476	-0.10743	-0.0373916	-0.497562	1.46009e-12	0	0.108197
O94874	3	3	128.01	E3 UFM1-protein ligase 1 OS=Homo sapiens GN=UFL1 PE=1 SV=2 - [UFL1_HUMAN]	7424.36	5431.87	5572.53	13760.9	10782.1	6967.46	5860.2	6396.58	8422.15	9320.53	10181.1	6491.29	8306.29	8243.41	7983.28	11550.2	7872.4	7118.67	6987.19	6443.38	6103.41	8394.72	9530.3	6311.37	0.00259406	1	1	1	-0.0976225	0.0324216	-0.19022	0	9.26767e-13	2.84076e-11
O00764	3	3	117.91	Pyridoxal kinase OS=Homo sapiens GN=PDXK PE=1 SV=1 - [PDXK_HUMAN]	16064.2	13433.8	15649.6	9392.96	11999.5	2577.08	12717.7	10846.4	8782.31	5473.71	9566.52	8505.61	14207.4	12454.5	14404.1	7719.18	10138.4	8879.2	10189	5302.19	5397.98	5321.37	8099.09	1718.23	3.18981e-05	1	1	0.903367	-0.306397	-0.0277011	-0.93993	0	0	0.044136
Q9Y3I0	4	3	161.57	tRNA-splicing ligase RtcB homolog OS=Homo sapiens GN=RTCB PE=1 SV=1 - [RTCB_HUMAN]	46319.6	49019.9	40459.3	51982.9	66141.2	73196.7	65283.2	78124.8	48528.6	65216.3	57508.6	66038.1	37658.9	56019.7	46688.9	61729.8	55065.9	63188.3	66978.6	85095.7	69048.9	74919.9	69947.3	76868.4	3.08366e-10	0.943525	1	0.062977	0.218834	-0.0301627	0.437028	0.0252468	0	1.20082
Q13243	4	3	248.46	Serine/arginine-rich splicing factor 5 OS=Homo sapiens GN=SRSF5 PE=1 SV=1 - [SRSF5_HUMAN]	75417.1	77636	69775	79895.7	76929	99508.8	96738.3	92862.4	82417.7	80166.7	68902.1	92656.7	80002.6	76407.5	77692.7	68786.2	64956.4	92645.7	92580.5	98937.5	80615.5	64463.2	87088.8	89527.7	0.000512506	0.999927	1	0.999964	0.100537	-0.0573393	0.0990454	3.15318e-05	8.30427e-09	1.55096e-05
Q9H2P0	3	3	156.87	Activity-dependent neuroprotector homeobox protein OS=Homo sapiens GN=ADNP PE=1 SV=1 - [ADNP_HUMAN]	11659.5	13280.6	3289.93	26912.6	15484.3	12777.5	14923.6	16321.8	13746.4	26507.5	19265.4	14525.4	8911.63	10388.6	9190.25	24073.4	9607.43	11282.7	14530.7	11914.5	18086.2	25304.9	17298.9	18549.5	0.000157659	0.873569	1	0.863931	0.336174	-0.183284	0.341571	0.0587026	0	0.0635211
P45954	3	3	159.56	Short/branched chain specific acyl-CoA dehydrogenase, mitochondrial OS=Homo sapiens GN=ACADSB PE=1 SV=1 - [ACDSB_HUMAN]	13432.2	11966.2	16641.6	22945.6	21030.8	21511.4	14841.9	15853.5	12636	22455.5	14295.6	13292	11765.6	14845.8	23694.8	29982.5	15086.5	20880.6	11690.3	16380.8	17746	16757.3	15099.2	15920.5	1.60203e-09	1	1	1	-0.203609	0.112591	-0.200223	3.15762e-08	0	6.32198e-09
Q9H936	4	3	213.33	Mitochondrial glutamate carrier 1 OS=Homo sapiens GN=SLC25A22 PE=1 SV=1 - [GHC1_HUMAN]	27375.8	28769	10876.8	43619.1	35270.7	21199.7	31667	44179.5	24370.8	58312.8	27891.3	29658.3	27301.8	33186.9	19612.2	52245.1	23646.9	24907.9	49164	67407.3	44592.3	50034.7	62884	52741.5	2.89285e-09	0.627042	0.999981	6.00151e-06	0.370755	0.114391	0.967706	0.202703	8.37082e-06	5.22174
P16989	10	3	563.23	Y-box-binding protein 3 OS=Homo sapiens GN=YBX3 PE=1 SV=4 - [YBOX3_HUMAN]	66767.5	84532.1	34985	81032.4	61857.7	68583	82662.9	106854	60685.3	80298.7	62309.8	98033.5	66414.4	77536.1	48579.6	78584.6	68948.9	89991.4	115445	140913	103602	76250	129060	140573	1.59199e-12	0.825633	0.999982	7.40504e-05	0.303375	0.112632	0.827457	0.0832128	7.8451e-06	4.13047
P62851	4	3	258.3	40S ribosomal protein S25 OS=Homo sapiens GN=RPS25 PE=1 SV=1 - [RS25_HUMAN]	381172	332223	262886	279982	234798	399430	441165	334576	387489	293581	312837	414420	339779	420225	238778	362288	357407	327103	477814	616026	480948	473341	350584	477918	6.77052e-13	0.999314	1	0.114697	0.208258	0.113749	0.60562	0.000297861	5.9022e-08	0.94045
P00918	3	3	170.72	Carbonic anhydrase 2 OS=Homo sapiens GN=CA2 PE=1 SV=2 - [CAH2_HUMAN]	35205.8	38527.3	32303.3	27999.8	36959.8	38958.5	32192.5	36829.5	28448	23118.3	24423.9	26841.9	49054.8	50617.4	51961.3	27786.7	46982.8	60262.8	44202	44367.8	45739.4	29987.3	51183.8	41619.9	7.01173e-16	0.961869	0.612468	0.976487	-0.288891	0.449294	0.292254	0.0168842	0.212916	0.0103335
Q9Y3U8	3	3	152.58	60S ribosomal protein L36 OS=Homo sapiens GN=RPL36 PE=1 SV=3 - [RL36_HUMAN]	176713	170599	97425.5	110111	119942	143358	165787	148498	167772	188184	162103	198294	153654	164337	63315.4	174793	177401	129268	209405	283535	219191	271183	143236	230648	6.76068e-11	0.997655	1	0.442831	0.333103	0.0766092	0.730197	0.00101957	0	0.353762
Q92734	3	3	160.43	Protein TFG OS=Homo sapiens GN=TFG PE=1 SV=2 - [TFG_HUMAN]	64417	61299.8	63786	73476.9	85584.3	69659	81815.7	97376.6	68397.6	90909.3	112281	86846.1	72643.4	60767.9	61587.5	64145.8	82028.5	69224	88104	119623	86888.7	125453	109528	102243	2.94537e-18	0.712047	1	0.0313444	0.362331	-0.0272516	0.595286	0.147492	0	1.50384
Q9H0U4	14	3	874.73	Ras-related protein Rab-1B OS=Homo sapiens GN=RAB1B PE=1 SV=1 - [RAB1B_HUMAN]	2918.41	7067.5	3551.94	10399.5	2051.54	6915.85	6090.81	3769.64	3649.56	7101.3	8825.26	7156.79	6065.36	8601.03	5105.43	6034.25	4735.31	6472.95	7921.8	5574.97	6275.25	11827.8	8101.05	8976.04	3.28288e-11	1	1	0.999868	0.153285	0.169788	0.56494	5.34547e-11	1.29623e-09	5.75144e-05
Q96RS6	3	3	203.41	NudC domain-containing protein 1 OS=Homo sapiens GN=NUDCD1 PE=1 SV=2 - [NUDC1_HUMAN]	33326	30713.6	45212.8	31392.2	38032.2	29563.3	29523.6	27043.2	29742.9	25747.2	28732.8	23862.5	37218.6	31865.3	40483	27203.2	31964.7	29744.8	24205.8	15217.5	20864.3	23575.4	25348.4	19161.7	1.06428e-13	0.84869	1	0.00433782	-0.338827	-0.0692574	-0.697906	0.0712509	3.82044e-11	2.36273
Q9GZZ9	3	3	110.74	Ubiquitin-like modifier-activating enzyme 5 OS=Homo sapiens GN=UBA5 PE=1 SV=1 - [UBA5_HUMAN]	32322.7	33247.2	34746.7	26408.6	36361.1	19483.9	26345.4	25379.2	17561.5	13007.3	17633	24322.9	30818.7	24565.7	27220.2	19871.2	18895.9	27374.2	20013.6	8971.22	10793.7	9295.79	14062.6	7796.06	1.47452e-13	0.653703	0.999276	1.41787e-05	-0.555214	-0.295601	-1.36392	0.184619	0.000314701	4.84836
Q6PIU2	3	3	231.88	Neutral cholesterol ester hydrolase 1 OS=Homo sapiens GN=NCEH1 PE=1 SV=3 - [NCEH1_HUMAN]	30344	38020.5	37323.9	45361.7	42847.8	41897.7	51602.6	54095.3	35761.7	61094	50982.6	48968.8	32103	40199.7	37269.1	46918.1	36203.2	46532.7	58270.9	74029	46292.2	58707.6	71119.5	45064.2	4.48641e-14	0.356181	1	0.00294353	0.359421	0.0208359	0.584105	0.44833	0	2.53113
Q9H223	3	3	234.1	EH domain-containing protein 4 OS=Homo sapiens GN=EHD4 PE=1 SV=1 - [EHD4_HUMAN]	33530	34360.3	28612.6	34102.1	33992.9	43363.9	30105.7	35003.5	24857.2	27664.4	23247.5	27486.9	34910.1	35975.2	32025.3	49260.7	33447.2	39804.2	26987.6	27878	30767.9	28210.9	29357.8	27287.3	1.56529e-16	0.716106	0.999995	0.844715	-0.304725	0.116314	-0.286636	0.145023	2.17755e-06	0.0732898
O14561	3	3	81.45	Acyl carrier protein, mitochondrial OS=Homo sapiens GN=NDUFAB1 PE=1 SV=3 - [ACPM_HUMAN]	23862.9	32062.7	20547.6	35862.9	26467.5	32627.9	36820.7	39119.5	25455.7	41146	29515	35202.6	27326.9	39440.6	30829.6	40614	22851.4	34492.9	43210.9	59597.7	43238.2	44744.4	37630.3	50610.1	1.01898e-12	0.921794	0.998693	0.00120652	0.273806	0.189946	0.702797	0.0353659	0.000567942	2.91847
Q13451	3	3	145.7	Peptidyl-prolyl cis-trans isomerase FKBP5 OS=Homo sapiens GN=FKBP5 PE=1 SV=2 - [FKBP5_HUMAN]	32520.2	31241.5	36856.4	26051.7	26896.8	32795	26618.1	19455	26368.9	20217.8	22742.4	18218.9	30800.5	27825.6	33956.9	25766.7	26490.8	26492	20658.1	12796.2	18091.2	12936.7	17858.7	17536	1.0816e-14	0.0279164	0.999972	3.83579e-08	-0.479957	-0.121307	-0.899881	1.55414	1.19937e-05	7.41614
Q9BYD3	3	3	160.79	39S ribosomal protein L4, mitochondrial OS=Homo sapiens GN=MRPL4 PE=1 SV=1 - [RM04_HUMAN]	34810.9	34846.6	33702.9	41413.9	26436.8	39429	39316.9	39641.1	40483.2	30552.6	36102.3	38871.6	30921	50102.3	41396.8	50202.1	35592.8	37800.6	45881.8	60457.8	40788.4	50050.5	37125.1	57885.4	1.38033e-05	1	0.99691	0.295716	0.0949373	0.22397	0.472122	4.30912e-08	0.00134384	0.529125
O60502	3	3	137.98	Bifunctional protein NCOAT OS=Homo sapiens GN=MGEA5 PE=1 SV=2 - [NCOAT_HUMAN]	29871.1	19325.8	32543.2	15997.4	25897.7	14866.3	18932.7	16461.7	19605.2	12632.5	13712.2	13572.4	22436.8	13481.9	25445.7	12160.7	18099.5	16676	11659.2	5410.08	9687.14	9608.6	12481.5	9114.67	9.48848e-09	0.888357	0.997397	0.000852584	-0.545168	-0.354862	-1.25674	0.0514126	0.00113208	3.06926
Q9BZF1	3	3	238.08	Oxysterol-binding protein-related protein 8 OS=Homo sapiens GN=OSBPL8 PE=1 SV=3 - [OSBL8_HUMAN]	23227.1	22892.8	24509.9	30946.3	25392.7	33598	23690.4	23882.3	19688.4	16300.1	15951.8	24835.1	19368.1	22270.4	29847.7	22911.1	16343.6	24896.9	10930.4	12315.4	16616.6	12130.7	15002.2	22265.2	2.24657e-10	0.94803	0.999231	0.0105915	-0.368787	-0.243413	-0.847076	0.0231781	0.000334102	1.97504
P84085	13	3	650.9	ADP-ribosylation factor 5 OS=Homo sapiens GN=ARF5 PE=1 SV=2 - [ARF5_HUMAN]	40891	30844.3	36040.6	14695.9	19604.9	26266.4	25923.6	23024.8	26366.3	2809.94	11036.8	19040.1	34822.9	32638.1	27885.8	14656.9	16437.8	21917.1	8933.72	18797.5	15893	8645.36	13670.3	10867.7	6.30305e-06	0.5077	1	0.127753	-0.637684	-0.182316	-1.13208	0.294393	1.27647e-09	0.893629
P11310	3	3	135.5	Medium-chain specific acyl-CoA dehydrogenase, mitochondrial OS=Homo sapiens GN=ACADM PE=1 SV=1 - [ACADM_HUMAN]	20128.2	14862.2	19799.4	53934.8	41460.4	26088.5	17110.1	18496.1	15556.8	38133.8	27701.9	19528.4	20649.5	13031.1	32018.5	47655.4	33649.8	27855.4	15601.6	12708.1	19275.5	25281.1	31529.8	19988.6	0.426186	0.999994	1	0.999312	-0.368628	-0.011617	-0.503007	2.52095e-06	0	0.000298686
P40121	3	3	117.6	Macrophage-capping protein OS=Homo sapiens GN=CAPG PE=1 SV=2 - [CAPG_HUMAN]	12737	8831.49	17612.8	13672.1	18098.4	9239.22	7405.79	4991.85	7627.54	8685.64	14213.6	7109.49	12288.4	7651.89	18994.7	19102.5	18178.4	14948.8	7943.23	4959.03	6734.05	9752.62	16290.1	5377.15	7.52003e-10	0.94107	1	0.924854	-0.680531	0.185037	-0.651352	0.0263783	1.3187e-10	0.0339266
Q9NW64	3	3	122.41	Pre-mRNA-splicing factor RBM22 OS=Homo sapiens GN=RBM22 PE=1 SV=1 - [RBM22_HUMAN]	24643	32646.4	25928.1	39929.6	27814.5	44968.8	33947.8	33702.7	40220.1	36831.7	37674.1	50358.2	35480.4	35899.7	31259.6	34326	39150.8	41795.7	44064.3	51156.4	48688.7	46278.7	47717.7	44052.2	1.43719e-05	0.947397	0.999143	0.0434749	0.248344	0.153406	0.525139	0.0234678	0.000372366	1.36176
P84095	3	3	152.07	Rho-related GTP-binding protein RhoG OS=Homo sapiens GN=RHOG PE=1 SV=1 - [RHOG_HUMAN]	22254.2	19560	11960.1	22388.2	17744.9	22783.3	28546.5	27339.4	21876.8	41714.2	26588.7	32141.6	15171.4	25874.7	12479.6	30277.9	20171.4	24643.8	33846.2	48305.7	35133.7	45077.1	26368	39430.1	9.33399e-13	0.252556	1	0.00146766	0.610866	0.140411	0.967361	0.597642	1.62863e-09	2.83338
Q9BTW9	3	3	182.19	Tubulin-specific chaperone D OS=Homo sapiens GN=TBCD PE=1 SV=2 - [TBCD_HUMAN]	23096.9	23120.7	23690.3	7778.89	9220.57	12011.1	6814.2	11848.2	13542.9	10865.8	4083.91	6210.36	17776	9663.92	17160.2	3433.85	6128.68	9928.36	3965.97	5635.84	7298.77	1569.19	4172.74	3810.79	5.33608e-09	0.46345	0.818258	1.95993e-05	-0.890333	-0.626118	-1.90279	0.333997	0.0871095	4.70776
Q13123	3	3	141.36	Protein Red OS=Homo sapiens GN=IK PE=1 SV=3 - [RED_HUMAN]	17779.4	21090	9306.79	43291.7	28537.2	23464.7	36270	37292.3	26988.7	54627.2	37992.5	35948.1	21088.1	22321.6	19550.6	40996.4	21663.6	14323.1	37563.8	43897.1	40267.3	41368	41908.1	41554.1	1.88677e-09	0.0102456	1	0.000820671	0.675349	-0.0359037	0.781184	1.98946	0	3.08583
Q16698	3	3	131.46	2,4-dienoyl-CoA reductase, mitochondrial OS=Homo sapiens GN=DECR1 PE=1 SV=1 - [DECR_HUMAN]	64113.2	66450.8	66919.5	94053.2	81067.8	94071.5	66890.6	64995.3	56342.5	88710.8	68873.9	70282	62091	59546	75460	83842	69760	85726.8	51377.2	50499.2	54801.6	73455.5	73902.9	70612.2	0.000182255	0.993805	0.999996	0.322304	-0.165508	-0.0966852	-0.316884	0.0026989	1.77141e-06	0.491735
Q8WY22	3	3	248.64	BRI3-binding protein OS=Homo sapiens GN=BRI3BP PE=1 SV=1 - [BRI3B_HUMAN]	28688.4	29147.3	21055.2	19120	17106.2	31981.2	30846.2	39213	26634	33172.6	21946.2	30904.9	24723.5	32966.8	32177	24047.9	17734.2	31970.4	30915.1	39711.4	38256.5	24578.2	39827.7	42074.6	0.153313	0.998174	1	0.758921	0.312829	0.153567	0.549993	0.000793942	2.82537e-08	0.119804
Q99805	3	3	105.94	Transmembrane 9 superfamily member 2 OS=Homo sapiens GN=TM9SF2 PE=1 SV=1 - [TM9S2_HUMAN]	23678.7	21036.3	8277.66	13788.5	12985.5	16843.6	22810.6	25663	23601.7	24316.8	10929.5	24598.8	24873.4	33628.7	9801.26	25930.3	26181.4	23619.1	36805.8	73752.8	24606	34047.7	22496.6	31440.9	9.16811e-08	0.928505	0.763267	0.00265622	0.449419	0.576161	1.20776	0.0322156	0.117323	2.57574
Q15006	3	3	187.85	ER membrane protein complex subunit 2 OS=Homo sapiens GN=EMC2 PE=1 SV=1 - [EMC2_HUMAN]	10273.3	15030.2	8686.05	11361.7	17079.6	13165	17721.4	15355.4	11036.3	20817.6	12589.3	14470.8	15357.9	17557.9	11116.2	12974.7	14966.1	15763.5	17947.4	26527.7	13492.8	19141.5	22174.2	13612.9	0.212161	0.996439	0.999685	0.414791	0.283182	0.214867	0.57862	0.00154914	0.000136771	0.38217
O75934	3	3	144.6	Pre-mRNA-splicing factor SPF27 OS=Homo sapiens GN=BCAS2 PE=1 SV=1 - [SPF27_HUMAN]	12692.5	13883.9	13763.5	38818	27465.3	24055.9	17561.9	19317.9	20498.7	31659.1	37004.5	39245.2	19333.5	14850.1	12196.2	20419.3	25854	23380.7	17497.2	14776.4	19827.1	30321.9	33495.3	32985.4	0.00464067	0.963089	1	0.999838	0.338949	-0.171483	0.188347	0.0163334	1.01052e-11	7.04201e-05
P46779	4	3	162.47	60S ribosomal protein L28 OS=Homo sapiens GN=RPL28 PE=1 SV=3 - [RL28_HUMAN]	94702.6	73812.5	65568.4	55397.4	41973.3	80638.5	101019	91587.9	109725	71428	67089.6	100512	84964.6	96024.3	53000.4	84714.6	72254.7	71196.1	115355	124551	133178	93966	57318.9	112378	0.0356626	0.99939	1	0.95307	0.393625	0.165407	0.627752	0.0002649	2.26666e-09	0.0208754
Q9Y6A5	3	3	140.05	Transforming acidic coiled-coil-containing protein 3 OS=Homo sapiens GN=TACC3 PE=1 SV=1 - [TACC3_HUMAN]	2413.65	2251.15	2557.68	2104.37	931.958	8628.23	11476.2	9307.74	5801.44	2010.46	2451.35	13489.5	2759.31	3749.1	2766.02	573.176	1813.45	9796.67	9767.46	6909.23	8051.91	2550.2	12614.1	16517.8	0.000298408	0.910157	1	0.468797	1.2376	0.184102	1.57857	0.0408836	0	0.329015
Q96P16	4	3	250.47	Regulation of nuclear pre-mRNA domain-containing protein 1A OS=Homo sapiens GN=RPRD1A PE=1 SV=1 - [RPR1A_HUMAN]	27816.7	32322.5	35380.3	39253.5	40122.3	48335.5	30747.7	28990	23353.7	30637.3	34003.5	30291	32177.9	33079.3	43448	29011.8	43534.9	48841.3	23894.1	23955.5	32598.4	30007.1	37076.8	32560.9	1.41245e-08	0.652021	1	0.688073	-0.326471	0.0436829	-0.309794	0.185738	0	0.162366
P53597	3	3	180.15	Succinyl-CoA ligase [ADP/GDP-forming] subunit alpha, mitochondrial OS=Homo sapiens GN=SUCLG1 PE=1 SV=4 - [SUCA_HUMAN]	87991.9	97986.8	69395.6	115984	72445.1	99104.2	88999.8	96341.8	63769.8	88677.9	64078.2	63476.2	86660.3	79897.7	98266.9	123721	63006.3	99913.8	79281.7	87328.4	96209.3	55642.4	55597	92551.6	1.00864e-06	0.999082	1	0.998582	-0.222409	0.0225659	-0.218488	0.000398948	0	0.000616181
P10620	3	3	174.28	Microsomal glutathione S-transferase 1 OS=Homo sapiens GN=MGST1 PE=1 SV=1 - [MGST1_HUMAN]	68669.3	63994.6	27563.5	64629.1	44458.1	56957.2	97990.7	109783	70057.5	84953.3	68044.8	87425.3	58774.4	93416.5	48804.9	83734	69611.2	73970	137349	173952	107039	96039.9	94880.1	115275	3.22758e-05	0.115342	0.880668	6.12269e-05	0.667586	0.392584	1.15098	0.938012	0.0551877	4.21306
P19404	3	3	162.73	NADH dehydrogenase [ubiquinone] flavoprotein 2, mitochondrial OS=Homo sapiens GN=NDUFV2 PE=1 SV=2 - [NDUV2_HUMAN]	19663.6	19956.7	20552.2	29127.8	22746.3	31946.5	17461.6	26821.6	29374.1	23195	36595.5	40229.5	27299	39034	20675.7	26222	40485.6	33468.8	32211.8	53859.6	26972.4	49539.7	29332.7	41749.6	3.1202e-07	0.999965	0.993939	0.459133	0.27041	0.378466	0.698446	1.52467e-05	0.00264014	0.338062
Q96IX5	3	3	222.51	Up-regulated during skeletal muscle growth protein 5 OS=Homo sapiens GN=USMG5 PE=1 SV=1 - [USMG5_HUMAN]	60829.5	62015.4	22561.4	78548.9	57105.3	42112.7	103249	119078	70870.1	124951	102988	109989	56403.6	111401	33722.2	136359	101803	75638.9	167122	285936	108737	242850	134899	156713	6.619e-12	0.0125613	0.576472	1.0564e-07	0.965619	0.673181	1.76221	1.90097	0.239222	6.97617
Q9Y5K5	3	3	149.59	Ubiquitin carboxyl-terminal hydrolase isozyme L5 OS=Homo sapiens GN=UCHL5 PE=1 SV=3 - [UCHL5_HUMAN]	71907.4	96496.6	88456.7	64568.8	65649.5	111140	72225.7	72291.5	66849.5	58970.1	63490.9	87475.1	82316.1	78058.4	78361.9	56621.1	50867.9	93273.4	59579.9	47431.7	64253.7	47072	74487.7	71368	0.0452099	0.999352	0.999954	0.6595	-0.241923	-0.180922	-0.452077	0.000281511	1.97787e-05	0.180785
P62861	3	3	116.81	40S ribosomal protein S30 OS=Homo sapiens GN=FAU PE=1 SV=1 - [RS30_HUMAN]	118775	131997	114473	109245	77163	151367	126700	125571	108889	96596.3	130530	123634	118388	173110	88644.3	138380	190753	139948	147738	161872	140448	159708	122169	138436	9.62801e-06	1	0.999855	0.99682	0.0181497	0.272575	0.308064	0	6.30908e-05	0.00138308
Q9UHG3	3	3	85.52	Prenylcysteine oxidase 1 OS=Homo sapiens GN=PCYOX1 PE=1 SV=3 - [PCYOX_HUMAN]	14915.1	14891.6	14651.2	12076.3	12670.6	13900.5	29560.5	27848.5	16799.4	23251.6	19887.3	20761.8	16747.3	12501.7	17138.4	14884.5	11706.2	14583.2	24041.6	37307.7	24392.9	20199.6	19111	25037.6	2.81451e-13	0.0737225	1	0.0144114	0.732796	0.0753515	0.85282	1.1324	6.93544e-13	1.8413
Q9BUQ8	3	3	172.4	Probable ATP-dependent RNA helicase DDX23 OS=Homo sapiens GN=DDX23 PE=1 SV=3 - [DDX23_HUMAN]	16377.7	16859.3	17558.2	19662.4	15044.6	26990.6	23879.5	25242.6	23919.9	34939.2	19232	27045.2	18226.1	24405	16219.8	32591.8	19750.4	23160.7	30413.2	34977.9	29952.7	26798.2	28479.9	38540.9	8.746e-10	0.505289	0.996058	0.00642586	0.455517	0.256205	0.749796	0.29646	0.0017155	2.19207
Q9NQG5	4	3	325.88	Regulation of nuclear pre-mRNA domain-containing protein 1B OS=Homo sapiens GN=RPRD1B PE=1 SV=1 - [RPR1B_HUMAN]	35730.4	44168.9	28501.1	43087.8	45640.4	41687	58568	53824	51714.8	47272.9	50809.4	50972.6	41173	35982.8	41140.1	58449.4	39590.9	44379.4	62391.8	59677.4	56837.4	46359.3	57963.5	63869.7	1.46846e-07	0.30703	0.999983	0.0231741	0.391011	0.126579	0.53945	0.512819	7.17072e-06	1.635
O75964	3	3	196.08	ATP synthase subunit g, mitochondrial OS=Homo sapiens GN=ATP5L PE=1 SV=3 - [ATP5L_HUMAN]	68731.1	60912.5	23849.7	114276	59359.8	51796.4	102645	101294	79375.5	158498	111418	113902	57269.6	103910	43778	166837	99753.3	68046.2	151686	207457	112642	218566	146569	148347	2.81219e-11	0.00546148	0.634388	1.2751e-07	0.816058	0.50996	1.3786	2.26269	0.197645	6.89446
Q9H6F5	3	3	159.37	Coiled-coil domain-containing protein 86 OS=Homo sapiens GN=CCDC86 PE=1 SV=1 - [CCD86_HUMAN]	9835.8	6621.96	4265.5	19421.2	12842.3	5025.19	18795.8	19737.2	25730.6	34081.9	34935	25424.5	12352.6	14174.6	7282.6	25130.2	26113.3	12513.2	31563.6	66011.1	39195.9	67643.6	44807	32501.4	5.14046e-14	0.000230925	0.467633	3.47391e-09	1.45193	0.750038	2.27985	3.63653	0.330095	8.45918
Q9Y624	3	3	126.66	Junctional adhesion molecule A OS=Homo sapiens GN=F11R PE=1 SV=1 - [JAM1_HUMAN]	27268.2	19292.6	9578.99	36111.3	20332.4	16175.1	27258.4	23832.5	30738.8	40241.2	32913	35979.4	30681.7	25185.9	10461.6	36866.2	36815.7	25320.4	34472.7	45041.9	36174.8	38841.4	52050	41731.7	3.88935e-08	0.0292246	0.812213	6.95806e-06	0.568626	0.360694	0.947488	1.53425	0.0903303	5.15751
P14927	3	3	177.8	Cytochrome b-c1 complex subunit 7 OS=Homo sapiens GN=UQCRB PE=1 SV=2 - [QCR7_HUMAN]	10201.5	17067.2	8635.07	19255.8	11769.2	13296.9	31785.6	32898.3	21044.8	33342	26729.4	30810.5	14063.7	33187.1	12257.4	26850.3	24543	17723.8	50780.9	89292	33370.1	41550.6	28912.5	38337.9	3.08025e-08	0.0146118	0.750627	6.23585e-06	1.13844	0.68104	1.81481	1.8353	0.124576	5.2051
Q04837	3	3	208.68	Single-stranded DNA-binding protein, mitochondrial OS=Homo sapiens GN=SSBP1 PE=1 SV=1 - [SSBP_HUMAN]	71552	92215.7	71833.1	63264.4	59884.9	95191.9	48411.2	57174.6	15532.6	29772.7	10728.2	15531.7	38947.7	49731.5	72778.4	56164	11690.5	53645.3	17408.9	31888	18134	15647.7	9822.94	20070	1.4397e-06	0.0116115	0.779185	0.000149422	-1.35753	-0.681923	-2.00655	1.93511	0.108359	3.82559
Q9H8V3	3	3	122.39	Protein ECT2 OS=Homo sapiens GN=ECT2 PE=1 SV=4 - [ECT2_HUMAN]	3728.54	4180.95	3570.35	11474.1	9644.05	9059.51	19204.4	17524	11856.5	30334	18788.7	14246.3	3873.14	3624.9	4460.04	9866.87	4268.45	7120.45	13445.1	7441.4	11120.2	18381.9	15987.5	18713.5	9.01452e-21	1.57724e-06	0.99977	0.00145384	1.42626	-0.326792	1.03041	5.8021	9.98323e-05	2.83748
Q9P0L0	3	3	141.78	Vesicle-associated membrane protein-associated protein A OS=Homo sapiens GN=VAPA PE=1 SV=3 - [VAPA_HUMAN]	47612.9	37369.5	33892.9	86749.5	48193.8	48316.1	45932.5	43361.2	47805	79213.5	64796.5	52651.6	47000.8	56078.8	46321.8	94894	69488.5	49724.9	55636.4	73585.5	50284.1	96234.3	60234.1	57213.6	6.1561e-05	0.99982	0.964757	0.58038	0.143621	0.266799	0.380028	7.82977e-05	0.0155822	0.236288
P40222	3	3	197.41	Alpha-taxilin OS=Homo sapiens GN=TXLNA PE=1 SV=3 - [TXLNA_HUMAN]	15664.6	19396.8	9264.76	3262.05	4081.76	21245.5	10181.4	12934.7	4597.21	615.024	988.717	6531.54	13505.1	11008.7	10559.7	475.899	3972.56	18524.8	7230.57	4827.78	4763.21	1962.51	5696.06	6590.82	0.000107926	0.791331	0.999935	0.985733	-1.02431	-0.329011	-1.23066	0.101642	2.80762e-05	0.00624071
Q16836	3	3	112.85	Hydroxyacyl-coenzyme A dehydrogenase, mitochondrial OS=Homo sapiens GN=HADH PE=1 SV=3 - [HCDH_HUMAN]	20978.5	40064.2	27742.3	27273.6	20085.1	16729.7	13595.1	15413.8	17245.8	27200.7	16205.3	10559.4	20124.7	14326.3	21888.2	21684.7	13872.4	13962.4	12007.8	14537.3	11452.8	12293	12306.2	11952.9	0.0035081	0.393553	0.735394	0.00452755	-0.609166	-0.530197	-1.03606	0.404997	0.13348	2.34414
O43598	3	3	174.81	2'-deoxynucleoside 5'-phosphate N-hydrolase 1 OS=Homo sapiens GN=DNPH1 PE=1 SV=1 - [DNPH1_HUMAN]	27175.7	20618	24831.5	5269.18	9755.49	20594.2	14352.4	12287	11007.5	3583.57	3852.14	10311.1	28653.2	16996	18298.8	4066.8	5822.75	19723.2	12353.8	8886.3	5714.56	4334.85	9947.08	11178.6	0.060086	0.7214	0.999999	0.754591	-0.966496	-0.210314	-1.04623	0.141824	2.65706e-07	0.122289
P11233	3	3	173.41	Ras-related protein Ral-A OS=Homo sapiens GN=RALA PE=1 SV=1 - [RALA_HUMAN]	26456.5	25365.9	12820.2	27773.5	19112.7	21671.7	41412.4	45703.8	29815.4	46155.6	31961.1	50054.4	31895.1	36989.1	17685.3	42298.9	31322.6	34662.8	51632.7	70554.8	42706.8	51350.6	45329.1	58398.7	4.43893e-09	0.00294969	0.391559	1.03963e-06	0.879787	0.548793	1.26435	2.53022	0.407202	5.98312
P60033	3	3	144.42	CD81 antigen OS=Homo sapiens GN=CD81 PE=1 SV=1 - [CD81_HUMAN]	54309.4	32636.4	26111.1	28109.6	22949.2	32825	96938.7	84186.8	84306.5	64319	52003	98602.7	35983	50325.8	28985.1	37905.6	27385.9	43983.8	81866.9	111886	73667.2	68937.2	70338.4	78698.8	3.548e-16	1.04642e-08	0.998931	4.91682e-09	1.28635	0.189399	1.3014	7.98029	0.000464414	8.30832
P04899	8	3	510.85	Guanine nucleotide-binding protein G(i) subunit alpha-2 OS=Homo sapiens GN=GNAI2 PE=1 SV=3 - [GNAI2_HUMAN]	25710.6	13997.1	11307.7	23064.2	15370.5	14407.9	25250.7	32783.1	24393.4	27542.2	27839.8	37540.9	22584.9	29393.9	10187.4	29524.6	20793.5	21796.7	30748.9	41971.4	30396.3	29864.4	28989	44435.9	5.63919e-15	0.00779297	0.923046	8.24371e-05	0.755625	0.370643	0.990873	2.1083	0.0347766	4.08388
P61916	3	3	166.92	Epididymal secretory protein E1 OS=Homo sapiens GN=NPC2 PE=1 SV=1 - [NPC2_HUMAN]	77667.7	75861.2	53882	88166.1	101193	100026	155721	161954	93104.3	161459	111190	128847	103578	88372	91738.2	130422	90805.8	120954	151833	172214	145046	135883	169143	162073	2.62195e-14	0.00923192	0.850093	5.6913e-05	0.709314	0.33321	0.914151	2.03471	0.0705336	4.24479
O75368	3	3	177.51	SH3 domain-binding glutamic acid-rich-like protein OS=Homo sapiens GN=SH3BGRL PE=1 SV=1 - [SH3L1_HUMAN]	93211.1	85738.8	99642.1	70683.6	88070.4	84767.5	81297.8	59693.8	79989.3	66311.4	71163.4	56919.5	85946.7	82030.1	80252	67933.2	80000.7	77152.4	59158.3	74063.5	61659.6	71011.6	67557.4	59143.5	1.66146e-07	0.532381	0.999879	0.19583	-0.329948	-0.141563	-0.411326	0.273777	5.2741e-05	0.70812
P36542	3	3	200.98	ATP synthase subunit gamma, mitochondrial OS=Homo sapiens GN=ATP5C1 PE=1 SV=1 - [ATPG_HUMAN]	40180.7	49661	22989.8	61064.6	37283	25230.6	58024	58804.4	58387	95580.6	81260.7	60247.4	43930.5	64754.7	29040.5	90554.2	70971.4	35036.4	86204.8	124112	58887.1	120498	63581.8	63628.3	5.3431e-06	0.00263394	0.565454	6.17649e-06	0.802419	0.499801	1.12863	2.57939	0.247603	5.20926
Q99439	5	3	290.92	Calponin-2 OS=Homo sapiens GN=CNN2 PE=1 SV=4 - [CNN2_HUMAN]	90464	117793	81237.8	109642	99117.5	87768.6	100440	115048	80885.3	96024.5	87559.5	91283.8	104613	102469	85483.2	97120.7	75951.5	97170.5	102138	97187.7	94738.1	83336.8	96520.9	79907	0.0163564	1	1	0.999999	-0.0368586	-0.0583148	-0.0815186	6.1582e-13	1.96503e-09	2.50529e-07
Q13177	6	3	347.02	Serine/threonine-protein kinase PAK 2 OS=Homo sapiens GN=PAK2 PE=1 SV=3 - [PAK2_HUMAN]	48935	53063.6	54084.5	57391.1	59386.5	55513.8	32366.4	35459.9	25346.9	24891	30785.4	29201.6	39181.8	33599.3	39713.1	36316.3	39462.3	43207.3	25542.2	19794.2	26788.6	21934.7	35805.5	14477.8	1.16946e-16	2.84164e-05	0.141915	1.85266e-09	-0.88305	-0.504453	-1.18584	4.54643	0.847973	8.7322
Q99436	3	3	57.1	Proteasome subunit beta type-7 OS=Homo sapiens GN=PSMB7 PE=1 SV=1 - [PSB7_HUMAN]	30534.6	28297.4	30677.4	5952.93	8163.38	26708.4	18184.8	18108	21822.5	8311.65	8257.23	14524.4	20508.5	17990.1	27130.3	9032.57	11999.6	17772.2	16484.2	8919.66	21976.4	5412.03	10389.6	14981.4	0.0177066	0.999994	1	0.996449	-0.546962	-0.319634	-0.737654	2.74561e-06	0	0.00154505
Q14739	3	3	203.38	Lamin-B receptor OS=Homo sapiens GN=LBR PE=1 SV=2 - [LBR_HUMAN]	34683.3	19524.1	14764.2	37521.3	26436.5	21931.8	54424.3	38474.6	41828.8	85946	44786.3	44190.6	39313.6	35863.5	23265.7	56766.7	38961.6	33665.6	66304.5	104315	40249.8	78966.1	54640.3	36185.7	7.92598e-10	0.00675735	0.597477	0.000117447	0.999666	0.557025	1.29753	2.17022	0.223679	3.93016
Q8N4Q1	3	3	130.85	Mitochondrial intermembrane space import and assembly protein 40 OS=Homo sapiens GN=CHCHD4 PE=1 SV=1 - [MIA40_HUMAN]	33110.7	48800.7	28883.7	20681.8	19534.4	49921.3	60200.5	75268.6	38006.6	32748.7	17595.9	57018.1	42927.6	48787.1	44604.7	18629.4	15363.1	54360.1	48467.4	68632.6	54925.8	14282.3	42200.2	62445	0.581926	0.999884	1	0.999548	0.483029	0.161108	0.534076	5.05592e-05	0	0.000196407
P49023	3	3	114.94	Paxillin OS=Homo sapiens GN=PXN PE=1 SV=3 - [PAXI_HUMAN]	24556.8	22802.2	28608.9	25671.9	34256.7	26112.1	15305.7	12500.7	19191.1	14651.2	18092.6	15489.7	19097.5	18770.4	25385.1	19617.4	33016.7	19559.2	15404.3	15147.2	16636.6	16891	16052.6	10139.3	5.08315e-14	4.11478e-06	0.741806	2.176e-07	-0.766568	-0.258349	-0.843735	5.38565	0.129709	6.66234
Q02978	3	3	144	Mitochondrial 2-oxoglutarate/malate carrier protein OS=Homo sapiens GN=SLC25A11 PE=1 SV=3 - [M2OM_HUMAN]	5069.42	9283.91	3807.72	5217.02	2905.75	7697.91	5279.56	12989.6	9030.17	9590.79	12067.8	16286.9	8082.32	22189	5118.87	8177.12	13796.7	5592.18	16833.8	31823.1	9295.03	18647.9	5285.3	14235.2	0.00023112	0.694817	0.910641	0.111928	0.941103	0.88959	1.50008	0.158129	0.0406529	0.95106
P36915	3	3	125.7	Guanine nucleotide-binding protein-like 1 OS=Homo sapiens GN=GNL1 PE=1 SV=2 - [GNL1_HUMAN]	16282.9	12048	16033.8	14807.7	13033	11264.2	10736.2	12379.6	11301.6	8875.77	7981.28	7518.37	9958.39	8875.51	12715.1	9846.43	9765.97	13471.7	6226.42	10406.1	9883.36	6281.35	9256.43	8877.96	4.11412e-08	0.131672	0.661344	0.00204422	-0.505609	-0.368979	-0.71269	0.880508	0.179573	2.68947
Q9H9B4	4	3	248.6	Sideroflexin-1 OS=Homo sapiens GN=SFXN1 PE=1 SV=4 - [SFXN1_HUMAN]	12480.2	17241	8201.41	23921.9	19132.8	15195.5	28412.4	46084.7	51469.2	52057.4	87651.4	103517	42355.4	67036.6	10429.1	43813.9	75729	40406.8	94655.1	224402	40787.2	177938	42570.5	95904.1	8.89699e-06	0.0376274	0.38743	0.000266304	1.94067	1.54054	2.81387	1.4245	0.411807	3.57462
Q9UDW1	3	3	186.58	Cytochrome b-c1 complex subunit 9 OS=Homo sapiens GN=UQCR10 PE=1 SV=3 - [QCR9_HUMAN]	30911.7	44763.2	10070.1	66851.9	34213.8	23669.5	65896.4	92906.2	52720.9	99703.8	66544	83008.8	38113.6	93645.9	24634.9	100757	59406.4	48824.2	101776	146388	73397.9	100237	86723.8	109398	3.25727e-09	0.000185428	0.0979518	1.29412e-07	1.13039	0.795721	1.55374	3.73182	1.00899	6.88803
O60306	3	3	91.86	Intron-binding protein aquarius OS=Homo sapiens GN=AQR PE=1 SV=4 - [AQR_HUMAN]	3321.93	2792.02	3912.86	12014.2	9577.99	5544.16	7670.13	2673.3	3156.6	18353.7	12689.8	10996.4	2527.64	5247.64	4734.83	6704.62	14554.7	8202.11	4936.8	7163.32	2882.73	15571.2	13027.8	13007.2	0.0259306	0.995376	1	0.958057	0.579656	0.175539	0.606653	0.00201282	3.84787e-09	0.0186087
Q9BYN0	3	3	147.01	Sulfiredoxin-1 OS=Homo sapiens GN=SRXN1 PE=1 SV=2 - [SRXN1_HUMAN]	8492.78	6851.67	15478.5	14302.7	18631.7	2954.43	58038.9	37718.5	53861.9	46092	82245.1	43743.6	12208.6	6811.13	11403.3	8431.65	12251.1	5694.27	40175.6	24075.3	20647.8	43810.5	66820.7	11162.5	4.60236e-15	0.00564176	1	0.299713	2.2697	-0.23205	1.63147	2.24859	0	0.523295
Q53HL2	3	3	200.46	Borealin OS=Homo sapiens GN=CDCA8 PE=1 SV=2 - [BOREA_HUMAN]	7865.47	8816.07	8518.8	10706.7	8885.95	12824.5	39639	45158.8	30009.6	56395.9	32622.8	45655.1	12732.7	17937.6	12592.9	21608.7	11077.9	14373.8	43813.8	53316	41193	34906	40558.1	50280.4	4.31748e-23	4.3584e-10	0.288358	4.35558e-10	2.11435	0.648598	2.19633	9.36067	0.540068	9.36095
P30154	10	3	723.96	Serine/threonine-protein phosphatase 2A 65 kDa regulatory subunit A beta isoform OS=Homo sapiens GN=PPP2R1B PE=1 SV=3 - [2AAB_HUMAN]	31199.2	27151.2	28596.4	25177.3	25420.2	25317.7	42014.3	41871.2	39782.9	25605.6	32461.9	28440.4	32028.9	27157.7	31814.5	24501.1	30879	22410.5	33035.1	37503.8	32710.6	25798.8	38949.9	37079.5	0.0118722	0.926636	1	0.957693	0.36795	0.0515929	0.33252	0.0330907	0	0.0187736
P11717	3	3	108.39	Cation-independent mannose-6-phosphate receptor OS=Homo sapiens GN=IGF2R PE=1 SV=3 - [MPRI_HUMAN]	13183.4	12293.3	5399.48	15240.3	12476	8493.2	18911.3	19565.5	14715.4	19172	17622.6	20387.1	9272.17	13559.5	9394.99	22556	16031.7	11025	16205	26242	18359	19407.2	16991	17724.4	4.07109e-06	0.00145154	0.960142	0.000501553	0.71832	0.286788	0.776659	2.83817	0.0176647	3.29968
P54725	3	3	208.99	UV excision repair protein RAD23 homolog A OS=Homo sapiens GN=RAD23A PE=1 SV=1 - [RD23A_HUMAN]	37626.9	43268	25553.2	13569.1	11574.1	27612.2	15931.8	17249	12598.6	3357.91	5343.5	8879.11	16533.6	15359	15348.6	2822.03	7444.73	17982.3	9343.37	14337.3	5647.85	1616.63	7025.44	6075.05	0.000731663	0.554158	0.83298	0.0677513	-1.32923	-1.07651	-1.8538	0.256366	0.0793653	1.16908
Q9BPX3	4	3	279.93	Condensin complex subunit 3 OS=Homo sapiens GN=NCAPG PE=1 SV=1 - [CND3_HUMAN]	23804.2	26719.9	21965.3	25828.3	33384.5	35664	20871	22213.5	15525.1	15843.5	19618.7	22285.8	12249.9	13770.9	15565.1	13805.2	15847	20350.6	9539.72	8275.25	15577.2	11728.9	21616.2	13058.1	9.65156e-20	0.201373	0.000258241	4.32966e-07	-0.524441	-0.869767	-1.06863	0.695998	3.58797	6.36355
P50402	3	3	202.06	Emerin OS=Homo sapiens GN=EMD PE=1 SV=1 - [EMD_HUMAN]	21904.9	15068.4	5972.39	11321.9	11709.9	24852.3	23165.6	26672.6	16257.1	16852.4	16471.2	27864.2	23026.8	22756.9	7294.34	23441.1	17297.3	24078.9	25253.1	41843	22088.6	15708.8	15145.9	23158.2	0.000261017	0.96576	0.999246	0.851533	0.486801	0.376268	0.656769	0.015131	0.000327646	0.0697986
Q15070	3	3	87.06	Mitochondrial inner membrane protein OXA1L OS=Homo sapiens GN=OXA1L PE=1 SV=3 - [OXA1L_HUMAN]	3101.57	4044.69	1495.1	6021.65	3049.31	1549.59	3301.69	4062.31	4498.83	7277.39	8057.97	7624.53	4401.72	5861.62	3951.29	9583.98	6546.61	3212.49	6767.12	8062.91	4100.29	13485	5890.51	7679.77	0.00261955	0.171866	0.273602	0.00357922	0.854279	0.800894	1.25543	0.76481	0.56288	2.44621
O00273	3	3	163.16	DNA fragmentation factor subunit alpha OS=Homo sapiens GN=DFFA PE=1 SV=1 - [DFFA_HUMAN]	33724.2	31623.2	24701.8	30729.5	34750.5	28662.5	18788	26102.7	16314.1	17862.9	20810.3	17534.9	20803.3	19837.2	22687.9	19097.2	23007.6	27637.9	14657	16258.5	17203.7	18091.6	19445.6	16825	1.7119e-15	0.00108268	0.088923	4.75739e-06	-0.649617	-0.46901	-0.845845	2.9655	1.05099	5.32263
Q9H501	3	3	224.5	ESF1 homolog OS=Homo sapiens GN=ESF1 PE=1 SV=1 - [ESF1_HUMAN]	13310.3	18333.1	11431.3	16469.2	14650.8	18878.3	18637	31398.7	20127.1	32707.5	16452.7	25287.3	13324.1	14085.6	12103.7	19345.4	14868.7	21194	18806.3	21717.1	25738.8	22478.3	16143	26891.7	1.94445e-12	0.0803889	1	0.320267	0.635735	0.0283717	0.501644	1.0948	0	0.494488
P42224	4	3	260.08	Signal transducer and activator of transcription 1-alpha/beta OS=Homo sapiens GN=STAT1 PE=1 SV=2 - [STAT1_HUMAN]	36957	42485	39090.5	41276.9	50609	58636.2	31114.9	26263.5	23359.7	26585.2	29015.5	27261.4	33463.1	30911.3	34529.9	30333.2	36159.7	46086.8	21655.9	18259	25738	29836.8	27956.9	30736.7	1.88446e-14	0.00991131	0.860649	0.00114302	-0.717725	-0.34735	-0.803252	2.00387	0.0651737	2.94195
Q68CQ4	3	3	135.87	Digestive organ expansion factor homolog OS=Homo sapiens GN=DIEXF PE=1 SV=2 - [DIEXF_HUMAN]	5070.51	6244.71	3769.29	13946.4	11176.7	10276.4	11380.8	13350.4	8914.66	19410.6	14002.3	13897.8	7205.37	7412.93	8032.02	9259.59	12669	8786.15	12504	11304	11070.6	12559.6	12686	15024.9	6.17178e-05	0.00656468	0.999766	0.0245166	0.68132	0.0800697	0.57393	2.18279	0.000101432	1.61054
Q9NZM5	3	3	205.83	Glioma tumor suppressor candidate region gene 2 protein OS=Homo sapiens GN=GLTSCR2 PE=1 SV=2 - [GSCR2_HUMAN]	10072.4	9431.59	7276.65	9764.87	9310.12	6644.36	17896.8	19221.2	16735.2	21311.1	13747	19562.9	7926.61	9682.17	8192.01	8279.86	7254.74	8501.76	18404.7	17069.6	12172.3	9740.22	9996.14	18531.6	4.38065e-20	0.000132869	1	0.0901015	1.04696	-0.0750945	0.710587	3.87658	4.96822e-13	1.04527
P26447	3	3	67.05	Protein S100-A4 OS=Homo sapiens GN=S100A4 PE=1 SV=1 - [S10A4_HUMAN]	39988.8	46743.8	34930.4	35277.7	32312.7	59320.2	16825.3	24695.6	11752.1	14844.1	8678.06	17814.5	38817.2	47369.7	40004.6	38263.2	31590.3	53923.1	18929.8	33462.7	21232.3	13756.8	14458.8	21846.5	3.08069e-06	0.0467596	1	0.453113	-1.39361	0.00807159	-1.00698	1.33013	0	0.343793
Q9NY12	3	3	139.54	H/ACA ribonucleoprotein complex subunit 1 OS=Homo sapiens GN=GAR1 PE=1 SV=1 - [GAR1_HUMAN]	38195.5	47844.2	33889.3	73525	40458.4	44420.2	68585.4	101234	107812	101780	103496	134353	71899.8	76156.9	37218.6	92024.2	63102.3	57401.3	117872	131172	93850.3	84957.4	79023.8	132790	5.01426e-12	9.2916e-07	0.335535	2.83372e-07	1.14907	0.515244	1.20051	6.03191	0.474262	6.54764
P38432	3	3	214.16	Coilin OS=Homo sapiens GN=COIL PE=1 SV=1 - [COIL_HUMAN]	2824.16	4065.06	3486.27	5380.67	2959.69	5935.06	1564.59	2504.63	16178.7	8253.33	15837.4	23026.9	12452.2	10343.5	887.607	14879.7	9896.48	7665.52	15693.5	18411	12071.4	15683.1	4747.65	25278.1	0.0271134	0.974678	0.99117	0.181977	1.45037	1.187	1.89818	0.0111387	0.00385202	0.739983
Q9Y5L0	3	3	164.53	Transportin-3 OS=Homo sapiens GN=TNPO3 PE=1 SV=3 - [TNPO3_HUMAN]	30192.6	26581.8	25135.8	29625.9	34180.1	27016.9	23823.4	27193.3	19688.3	17827.1	20498.2	21914.7	24302	24315.1	25370.4	27123	27733.4	30266.5	20217	23760	23048.4	20340.3	23370.3	22656.4	0.00657761	0.728926	1	0.849027	-0.399583	-0.118515	-0.372869	0.137316	4.55364e-08	0.0710784
Q16186	3	3	159.61	Proteasomal ubiquitin receptor ADRM1 OS=Homo sapiens GN=ADRM1 PE=1 SV=2 - [ADRM1_HUMAN]	29603.4	39417.5	28060.4	13698.6	20864	36914.1	31597.9	28729.7	20461.5	16362.8	12148.5	22835.1	21231	21635	26316.2	16997.2	16744.1	28596.4	24586.6	21746.5	21713.8	11555.1	17622.4	21332.2	0.00117735	0.972227	0.991253	0.72237	-0.351227	-0.357963	-0.507668	0.0122322	0.00381547	0.14124
Q92572	3	3	170.95	AP-3 complex subunit sigma-1 OS=Homo sapiens GN=AP3S1 PE=1 SV=1 - [AP3S1_HUMAN]	45646.4	54965	39636.1	48702.8	52213.1	61375.2	22456.4	28459.3	16580.6	17460.3	17491.7	20547.5	34178.1	37182.9	34683.1	27324.7	30711.8	45192.3	19596.1	19769.3	21488.3	16760.5	24421.8	19978.6	4.9783e-37	4.35633e-10	0.0134547	4.3565e-10	-1.29851	-0.531733	-1.31007	9.36088	1.87113	9.36086
O15372	4	3	209.86	Eukaryotic translation initiation factor 3 subunit H OS=Homo sapiens GN=EIF3H PE=1 SV=1 - [EIF3H_HUMAN]	55146.9	49587.1	70133.9	44414.3	45134.6	40648.7	45251.9	39146.8	48514.9	20178.4	33496.3	42082.5	46633.5	44557.8	59402.2	42664.8	48740.7	35669.6	45116.5	41642.2	38516	40410	39589.8	27018.3	0.000339933	0.56486	0.999999	0.788903	-0.415847	-0.135755	-0.393175	0.248059	2.49915e-07	0.102976
P43307	4	3	243.6	Translocon-associated protein subunit alpha OS=Homo sapiens GN=SSR1 PE=1 SV=3 - [SSRA_HUMAN]	18544.9	11839.5	10516.5	22961.7	19165.1	7235.24	27371.4	28015.2	34284.8	63286.3	44719.9	39227	31021.9	38987.5	19342	40232.3	43097	26071	60710.6	75317.5	30591	74297.8	44903.4	22355.9	0.000112492	0.00147874	0.0224921	2.8343e-05	1.3921	1.13876	1.77155	2.83011	1.64797	4.54755
Q9UL25	4	3	191.81	Ras-related protein Rab-21 OS=Homo sapiens GN=RAB21 PE=1 SV=3 - [RAB21_HUMAN]	27845.1	20927.4	15680.7	13713	21570	21231.1	20058.7	20344.8	16775.5	15407.6	12807.2	18372.7	22947.5	14378.9	16685.1	19121.5	14770.5	20311	21461.6	17759.5	17241.7	15328.3	13442.3	15374	0.000562787	0.998939	0.999989	0.990638	-0.221275	-0.160722	-0.265879	0.000461245	4.85708e-06	0.00408505
Q13601	5	3	312.99	KRR1 small subunit processome component homolog OS=Homo sapiens GN=KRR1 PE=1 SV=4 - [KRR1_HUMAN]	80580.3	76762.6	71302.1	80285.6	72703.9	46301.5	89954.2	108558	124741	142585	117921	120371	75229.3	57025.2	69336.2	69425.2	61712	58307.7	110994	93282.8	95175.3	92158	79537.2	96718.2	3.40389e-16	3.16813e-05	0.999987	0.117689	0.718447	-0.130096	0.408153	4.4992	5.60366e-06	0.929263
Q9UJX3	4	3	182.94	Anaphase-promoting complex subunit 7 OS=Homo sapiens GN=ANAPC7 PE=1 SV=4 - [APC7_HUMAN]	10502.4	11626.4	10970.7	19879.5	21143.1	17034.4	12779.2	12521.1	9164.68	16349.8	13911	10175.5	8507.45	7076.93	14941.9	14290.6	13010.2	12201.7	7915.84	9246.77	13715.6	14898.3	11630.7	8928.14	0.72477	0.999807	0.980079	0.917023	-0.283353	-0.380399	-0.458567	8.3796e-05	0.00873905	0.0376198
O95478	3	3	185.98	Ribosome biogenesis protein NSA2 homolog OS=Homo sapiens GN=NSA2 PE=1 SV=1 - [NSA2_HUMAN]	18601.4	17867.8	11148.6	32461.5	19157	20873.6	50451.7	42655.6	63143.7	96687.2	71692.4	76384.9	20425.9	35419.6	17297.8	34096.9	39283	29388	52882.5	68799.6	55925.1	78021.8	32267.6	68611.6	1.51804e-16	2.15462e-08	0.676247	5.46939e-07	1.7393	0.550492	1.56958	7.66663	0.169895	6.26206
O75116	5	3	158.36	Rho-associated protein kinase 2 OS=Homo sapiens GN=ROCK2 PE=1 SV=4 - [ROCK2_HUMAN]	18082.6	14777.6	15791.1	13865.6	23549.4	20844.8	11740.3	16989.7	7167.11	7519.07	7933.66	11721.7	16284.6	15224.1	13398.2	14224.8	10833.6	18473	11804.6	10341.3	9715.43	8476.2	13321.1	11882.7	2.06381e-05	0.125842	0.999781	0.333114	-0.761354	-0.27367	-0.705937	0.900175	9.51637e-05	0.477408
Q8TDN6	3	3	125.3	Ribosome biogenesis protein BRX1 homolog OS=Homo sapiens GN=BRIX1 PE=1 SV=2 - [BRX1_HUMAN]	18347.7	16238.2	13594.5	26946.3	21339.6	12936.9	31803.2	34783.8	52322.1	68252.8	55235	50097	22141.6	30339	17647.3	31897.8	27330.4	19854.9	48931	49129	44706.9	49207	34818.8	37420.6	2.2377e-13	2.44516e-09	0.520024	3.47289e-08	1.41875	0.447699	1.27205	8.61169	0.283976	7.45931
Q2NL82	3	3	153.05	Pre-rRNA-processing protein TSR1 homolog OS=Homo sapiens GN=TSR1 PE=1 SV=1 - [TSR1_HUMAN]	31441.8	57229.8	56665	54136.5	61116.1	65513	49440.1	39336.7	42988.4	53451.4	50392.7	51844.2	36742.5	44110.5	46603.8	52300.3	50137.1	45560.5	42412.3	34216	42640.8	53806.6	49799.6	43942.9	1.34923e-10	0.999776	0.987683	0.914758	-0.181995	-0.243509	-0.289466	9.72876e-05	0.0053824	0.0386938
P62857	3	3	167.15	40S ribosomal protein S28 OS=Homo sapiens GN=RPS28 PE=1 SV=1 - [RS28_HUMAN]	235706	211013	190184	144797	125514	246081	235089	187528	293358	145729	205759	297232	264220	297612	172333	208313	252127	258553	233046	276718	295232	205881	202990	298679	3.37969e-11	0.999431	0.962394	0.865184	0.242817	0.33343	0.391218	0.000247232	0.0166473	0.0628914
P50570	4	3	235.09	Dynamin-2 OS=Homo sapiens GN=DNM2 PE=1 SV=2 - [DYN2_HUMAN]	19939.6	17233.1	17788.4	15004.9	19640.8	23361.3	11519.3	14882.3	8197.76	9130.24	11478.9	12190.4	13394.5	13413.6	15083.6	13756.8	13355.7	20894.2	8374.15	12382.7	10244.2	7601.85	16563.3	13170	5.47504e-05	0.0979385	0.98985	0.0928971	-0.745119	-0.329547	-0.725194	1.00905	0.00443065	1.032
Q9H0C8	3	3	151	Integrin-linked kinase-associated serine/threonine phosphatase 2C OS=Homo sapiens GN=ILKAP PE=1 SV=1 - [ILKAP_HUMAN]	19323	18158.7	15733.1	14682.7	15771.8	13406.7	13300.7	14019.2	13381.3	14090.3	16208	9271.48	11986.5	10325.3	13200.2	12130.7	11808.2	8008.91	11835.4	10389.1	9485.21	13664.8	10952.4	10477.7	0.0776315	0.966162	0.157804	0.145268	-0.274237	-0.525085	-0.539167	0.0149499	0.801883	0.837829
Q9UJU6	3	3	164.06	Drebrin-like protein OS=Homo sapiens GN=DBNL PE=1 SV=1 - [DBNL_HUMAN]	30895.5	36575	24009.9	22705	27342	36042.2	15676.7	14613.9	9484.58	9512.39	9256.02	12078.2	19691.2	20797.9	21557.9	15391.1	17372.6	33854.6	12346.7	13305.7	14427.8	9643.6	12376.2	15359.9	4.3787e-28	7.44801e-10	0.23988	2.42204e-08	-1.3302	-0.464761	-1.19686	9.12796	0.620005	7.61582
P61923	3	3	251.91	Coatomer subunit zeta-1 OS=Homo sapiens GN=COPZ1 PE=1 SV=1 - [COPZ1_HUMAN]	86420.7	76297.9	89835.6	94073.9	105866	99278.5	67703.4	65714.9	50620.2	38176.8	44516.8	50726.7	75667.3	59358.3	78518.3	76409.4	61543.3	76502.3	56400.7	43862.9	53632.6	44805	71197.4	54572.4	6.02949e-10	0.00114746	0.799342	0.00279145	-0.797504	-0.366467	-0.765983	2.94026	0.0972672	2.55417
Q9BWF3	3	3	206.89	RNA-binding protein 4 OS=Homo sapiens GN=RBM4 PE=1 SV=1 - [RBM4_HUMAN]	6284.33	5214.8	7034.41	11843.9	8906.37	11078.5	12516.7	9519.12	22045.3	38357.2	26333.3	30919	27616.6	27767.7	9293.47	29144.6	32128.5	22935.7	24377.6	34616.2	33486	45306.7	22306.7	37155	8.77188e-08	0.0301077	0.00799813	6.20138e-05	1.47182	1.5638	1.9696	1.52132	2.09701	4.20751
O95336	3	3	129.26	6-phosphogluconolactonase OS=Homo sapiens GN=PGLS PE=1 SV=2 - [6PGL_HUMAN]	29807.1	26039.2	21128.1	40247.9	46863.6	47708.3	14399.7	18038.3	11643.9	16627.2	21494.4	19401.6	14462.3	13932.1	18412.6	11569.6	26829.3	29405.4	7663.06	13804.1	12120.2	13574.4	25704.8	15471.8	9.59292e-14	0.00272773	0.0154794	2.69342e-05	-1.05969	-0.885912	-1.26155	2.5642	1.81024	4.5697
Q15642	3	3	158.12	Cdc42-interacting protein 4 OS=Homo sapiens GN=TRIP10 PE=1 SV=3 - [CIP4_HUMAN]	4835.6	9156.6	7183.78	4141.46	9060.13	5666.95	12602	7720.42	10565	11634.4	7702.08	8368.36	7811.31	8329.71	7410.81	14961.4	13939.7	4638.91	10743	8539.25	9757.63	16464.7	13297.8	5350.3	0.113277	0.941328	0.993707	0.85539	0.549104	0.511682	0.679905	0.0262589	0.00274177	0.067836
P16435	3	3	162.09	NADPH--cytochrome P450 reductase OS=Homo sapiens GN=POR PE=1 SV=2 - [NCPR_HUMAN]	8791.35	8057.01	5749.7	11293.6	8130.98	10720.1	14654.5	16768.5	19957	19940	24989.4	22351.9	14961.4	20185.9	8437.77	15733.2	22972.4	15670.7	16688	28819.1	13071.7	26197.1	22672	23960.7	7.07418e-07	0.00195383	0.101274	0.00033777	1.1698	0.893241	1.31702	2.70911	0.994501	3.47138
Q1KMD3	4	3	218.41	Heterogeneous nuclear ribonucleoprotein U-like protein 2 OS=Homo sapiens GN=HNRNPUL2 PE=1 SV=1 - [HNRL2_HUMAN]	13057.6	8880.64	7957.61	17801	18106.2	12596.4	31290	31224.2	33907.7	41440.5	29708.3	31080.6	25376.5	22975.1	11244	33062.1	28801.7	23315.1	35550.8	37368.2	34962.5	28650.8	32190.6	39984.7	4.90193e-14	1.38701e-08	0.0016579	2.70237e-09	1.34133	0.884894	1.41257	7.85792	2.78044	8.56826
Q12792	3	3	278.63	Twinfilin-1 OS=Homo sapiens GN=TWF1 PE=1 SV=3 - [TWF1_HUMAN]	84992.1	80068	72656.6	77379.1	69448.9	98865.5	56633.1	67779.3	50264	38655.6	50868.4	55601.2	71060.3	61499.1	67464.8	59703.9	54475.8	80910.2	56711.9	53964.6	59103.3	40665.8	60182.8	57907.3	7.89432e-19	2.58441e-05	0.372152	0.000158146	-0.596071	-0.290979	-0.557198	4.58764	0.429279	3.80094
Q6DKI1	6	3	178.74	60S ribosomal protein L7-like 1 OS=Homo sapiens GN=RPL7L1 PE=1 SV=1 - [RL7L_HUMAN]	3495.86	2066.02	992.984	4368.85	1696.6	928.734	6020.39	4541.04	28541.8	20181	28455.5	23940	11517.5	9830.84	600.532	7683.08	12121.5	5096.36	19128.9	22857.6	16198	24913.6	4268.84	21793.1	5.25336e-10	0.000108487	0.330165	5.07668e-05	3.04311	1.78985	3.01018	3.96462	0.481269	4.29442
Q12888	5	3	198.43	Tumor suppressor p53-binding protein 1 OS=Homo sapiens GN=TP53BP1 PE=1 SV=2 - [TP53B_HUMAN]	1721.09	2289.28	584.212	7095.62	2685.71	1825.14	6183.09	3870.15	13397.1	25567.9	12206.7	22758.8	9543.9	4836.26	1681.25	13329.8	12571.2	14843.6	13473.4	12275.8	12671.4	18118.8	17373.7	22511.8	7.20352e-09	1.7261e-05	0.00407557	1.63939e-07	2.37402	1.80996	2.57332	4.76294	2.38981	6.78532
Q9NTX5	3	3	164.55	Ethylmalonyl-CoA decarboxylase OS=Homo sapiens GN=ECHDC1 PE=1 SV=2 - [ECHD1_HUMAN]	29745.6	37493.6	30891.5	48971.8	48724.6	34892.5	30440.6	33682.8	20602	31763.5	23022.2	24922.6	35589.9	28372.7	30749.2	41001.2	26242.5	39118	32291.2	22729.1	28399.6	26204.9	39714.2	22973.8	0.0125055	0.739226	0.999989	0.892623	-0.488635	-0.198418	-0.421112	0.131223	4.86662e-06	0.0493319
Q9Y3C1	3	3	160.53	Nucleolar protein 16 OS=Homo sapiens GN=NOP16 PE=1 SV=2 - [NOP16_HUMAN]	6767.01	6145.54	4000.23	15621.6	10358.6	3905.4	10549.7	10752.9	16528.3	29347.8	33767.4	32521.8	11595.5	11373.7	4815.74	8004.98	22568.9	14489.8	13269.2	13608.3	8935.54	30999.2	20611.5	27862.5	1.56095e-09	0.0040715	0.90489	0.0225643	1.51196	0.638442	1.30069	2.39025	0.0434041	1.64658
P13984	3	3	118.87	General transcription factor IIF subunit 2 OS=Homo sapiens GN=GTF2F2 PE=1 SV=2 - [T2FB_HUMAN]	8680.74	6764.31	6608.32	3494.98	18613.7	13748.6	13931.7	6204.3	4622.01	1562.8	4342.27	3547.68	5666.02	2591.3	5629.12	6040.53	7187.36	5534.94	3860.09	2378.67	6296.05	10658.6	4388.44	2827.18	0.00355407	0.753462	0.951002	0.658378	-0.759378	-0.826777	-0.929331	0.122939	0.0218188	0.181525
P08574	3	3	151.5	Cytochrome c1, heme protein, mitochondrial OS=Homo sapiens GN=CYC1 PE=1 SV=3 - [CY1_HUMAN]	57048.2	49791.7	33023.4	80436.1	61637.4	28831.6	87599.2	93521.5	101891	122351	127310	129550	89890.1	119533	47732.2	129103	103759	70790.7	137600	144349	73743.9	126559	116058	85041.8	1.00758e-08	7.91461e-05	0.0140911	5.40228e-05	1.09148	0.851667	1.13679	4.10157	1.85106	4.26742
Q9NP79	3	3	240.72	Vacuolar protein sorting-associated protein VTA1 homolog OS=Homo sapiens GN=VTA1 PE=1 SV=1 - [VTA1_HUMAN]	80587.1	90761.8	90227.1	82713.3	95334.3	101364	75502.1	75889.7	56525.6	54413.9	61827.6	69077.7	76210.7	65239.4	78975.3	54001.1	58836.9	89573.9	58558.8	62755	64249.2	56864.1	78517.5	67781.6	3.40588e-15	0.00354774	0.0626325	0.00231773	-0.460199	-0.355494	-0.476841	2.45005	1.2032	2.63494
Q13573	3	3	151.1	SNW domain-containing protein 1 OS=Homo sapiens GN=SNW1 PE=1 SV=1 - [SNW1_HUMAN]	17719.9	17691.4	17064.7	22437.3	18529.3	16683	29321.8	22243.4	40300.1	34775	29459.3	34816.1	29197.6	19983.5	17036.6	29117.3	24675.8	19894.6	33320.4	28639.4	35261.1	27501.3	25268.4	24384.9	0.000677746	0.01611	0.971189	0.0962907	0.793787	0.345302	0.663047	1.79291	0.0126965	1.01642
Q9Y320	3	3	145.18	Thioredoxin-related transmembrane protein 2 OS=Homo sapiens GN=TMX2 PE=1 SV=1 - [TMX2_HUMAN]	3747.21	2402.48	2002.21	7893.13	6374.44	2276.86	6086.37	4322.6	7569.47	15775.4	9157.18	6466.56	5180.09	7281.29	5206.86	11364.2	11409.2	3717.15	7437.28	9505.68	4887.43	16657.9	8463.26	4450.22	0.00116645	0.0680657	0.242481	0.0487768	0.999561	0.838404	1.05752	1.16707	0.615322	1.31179
P13798	4	3	199.79	Acylamino-acid-releasing enzyme OS=Homo sapiens GN=APEH PE=1 SV=4 - [ACPH_HUMAN]	109841	116242	99098.3	76580.5	89479.3	151240	63089.8	73671	54364.3	40871.5	53765.4	69186.1	86095.5	99443.7	92423.4	63938.7	70968.4	120211	64013.1	84044	69291.1	46388.3	73088.6	77740	2.83203e-11	0.000156236	0.971782	0.0242751	-0.856045	-0.2693	-0.632054	3.80622	0.012431	1.61484
Q8WW12	3	3	200.58	PEST proteolytic signal-containing nuclear protein OS=Homo sapiens GN=PCNP PE=1 SV=2 - [PCNP_HUMAN]	28448.8	31313.5	23161.9	24309.1	23498.1	32576.7	23969.7	28111.5	19459.7	28361.8	29386.9	20284.2	20185.7	21252.3	18409.9	22504.5	26486.9	22693.5	15694.6	26185.8	26325.3	22568.5	30957.9	16151.6	7.08449e-07	0.999998	0.939456	0.977398	-0.126739	-0.312174	-0.244144	8.57633e-07	0.0271233	0.00992847
Q14847	3	3	167.64	LIM and SH3 domain protein 1 OS=Homo sapiens GN=LASP1 PE=1 SV=2 - [LASP1_HUMAN]	112707	127250	82854.7	96706.1	110743	161639	64197	82465.2	48434.5	47509.5	57395.8	79765.2	95665.6	97729.6	89244.7	64571.8	88462.9	117618	74129.5	75417.1	64181.3	55233.2	83793.3	85462.7	2.95379e-08	1.45069e-05	0.815915	0.00530522	-0.865448	-0.322521	-0.658918	4.83843	0.0883552	2.2753
Q96KR1	3	3	160.88	Zinc finger RNA-binding protein OS=Homo sapiens GN=ZFR PE=1 SV=2 - [ZFR_HUMAN]	25067.2	34325.5	12768.6	35219.7	19306.1	31892.7	56830.1	53816.8	69017.9	53451.6	47230.9	74520	52020.1	50792.2	31070.3	45073.6	43253.8	47361	60276.4	62610	55268.3	48711.8	35190	69993.3	3.55757e-08	4.32696e-07	0.00296704	6.05801e-06	1.16207	0.765457	1.06619	6.36382	2.52768	5.21767
Q9Y570	3	3	170.16	Protein phosphatase methylesterase 1 OS=Homo sapiens GN=PPME1 PE=1 SV=3 - [PPME1_HUMAN]	34309	45382.2	33195.6	49235.1	86627.2	84214.3	36324.9	34538	25036	36708.5	45482.3	51572	39800.1	53862.9	35374	51777.4	65461.5	81840.8	39172.3	35420.2	29647.2	44599.6	63377.1	57321.1	2.28532e-11	0.493354	1	0.995987	-0.535854	-0.0211549	-0.304877	0.306842	0	0.00174636
Q6PD62	3	3	245.61	RNA polymerase-associated protein CTR9 homolog OS=Homo sapiens GN=CTR9 PE=1 SV=1 - [CTR9_HUMAN]	15025	14668.6	20174.3	17800.9	13287.7	16443.1	17013.1	13046.1	10387.2	25606.4	11349.6	14124.8	10504.3	11718.9	19493	17658.6	12057.1	12615.4	18371.4	11283.6	12651.9	15259.7	12542.7	16783.5	0.00152638	0.999999	0.998735	0.999981	-0.0897142	-0.212714	-0.164681	6.21228e-07	0.000549655	8.21608e-06
Q9BY32	3	3	165.23	Inosine triphosphate pyrophosphatase OS=Homo sapiens GN=ITPA PE=1 SV=2 - [ITPA_HUMAN]	41330.7	38811.4	33638.9	24760	35166	47394.3	20156.9	22260.2	19367.3	13866.8	12988.6	18012.9	38280.3	25979	30563.2	23282.9	23489.2	33964.8	21143.9	27337.8	22126.5	15972.5	23619.8	21028.2	9.99892e-21	1.10984e-07	0.771003	0.000631397	-1.05179	-0.332748	-0.752624	6.95474	0.112944	3.1997
Q86SX6	3	3	191	Glutaredoxin-related protein 5, mitochondrial OS=Homo sapiens GN=GLRX5 PE=1 SV=2 - [GLRX5_HUMAN]	44048.1	56637.7	29460.5	55864.8	56931.5	58116.4	49293.1	64460.2	34082.2	19605	38039.2	46614.7	42987.1	39521.5	44798.2	45232	28055	52169.2	17749	55696.5	32365.1	43585.6	48014.8	52029.7	0.209257	0.996159	0.999842	0.992659	-0.256083	-0.25226	-0.271349	0.00167123	6.84671e-05	0.0031998
Q6PJT7	3	3	96.41	Zinc finger CCCH domain-containing protein 14 OS=Homo sapiens GN=ZC3H14 PE=1 SV=1 - [ZC3HE_HUMAN]	3953.68	3896.78	3586.11	7701.57	4235.35	3552.23	8689.59	7285.62	13885	21840	13888.6	11409.1	7511.89	7925.64	2728.84	13459.9	8370.22	3810.56	11021.8	9258.83	11347.1	11834.3	9943.26	7631.75	3.90662e-06	6.44936e-06	0.668722	0.000483009	1.51584	0.702176	1.1807	5.19048	0.174754	3.31604
O75794	3	3	183.02	Cell division cycle protein 123 homolog OS=Homo sapiens GN=CDC123 PE=1 SV=1 - [CD123_HUMAN]	40585.3	45491.1	30576.1	33438.6	39120.3	48721.7	26089.8	34844.3	21579.6	22140.9	18511.9	26175.6	29753.5	32308.8	27333.7	24267.3	25081.3	35726.8	25555.1	25840.3	26013	28193.9	24592.4	27456.9	2.34985e-23	6.61518e-05	0.0610783	0.00182676	-0.671935	-0.447565	-0.593817	4.17946	1.21411	2.73832
P62899	3	3	126.62	60S ribosomal protein L31 OS=Homo sapiens GN=RPL31 PE=1 SV=1 - [RL31_HUMAN]	28795.6	15498.8	35587.4	45252.3	30819.4	30717.8	35720.1	15235.6	33081.8	35616.6	41483.2	35331	34577.8	19705.2	28530.5	45469	43870.9	31138.3	29361.9	17231	33019.3	46613.2	45368.4	28884.9	1.32838e-06	1	1	1	0.0737968	0.123051	0.10295	0	1.28451e-10	3.48749e-13
P60981	3	3	81.65	Destrin OS=Homo sapiens GN=DSTN PE=1 SV=3 - [DEST_HUMAN]	9626.16	11160.7	19995.6	31329.3	29246.8	18683	15811.6	14998.6	15224.7	15511.9	19751.2	9184.65	12884.7	9694.34	12786.1	12221.4	24979	11586.6	12798.4	12042.3	10543.2	22910.7	18632.6	9371.86	6.00829e-07	0.997799	0.910993	0.952882	-0.407821	-0.512464	-0.476117	0.000956921	0.0404848	0.0209607
Q9BSD7	3	3	152.34	Cancer-related nucleoside-triphosphatase OS=Homo sapiens GN=NTPCR PE=1 SV=1 - [NTPCR_HUMAN]	9405.58	15808.3	10618.9	17309.6	20229.4	18361.6	20350.7	22851.4	10410.2	17635.6	20320	21943.1	17978.7	18099.7	19713.8	23933.1	18885.6	32252.3	18798.5	19876.3	19615	19951.9	22701.4	21835.4	1.06979e-10	0.969965	0.343728	0.564715	0.307314	0.512539	0.42054	0.0132438	0.463785	0.248171
Q04323	4	3	256.99	UBX domain-containing protein 1 OS=Homo sapiens GN=UBXN1 PE=1 SV=2 - [UBXN1_HUMAN]	41208.6	67742	28167	6688.05	6736.3	47639	29499.9	42335.1	18179.9	3418.45	3959.04	24700.9	32364.6	38343	26986.4	7753.43	6386.54	36999.9	22385.5	41005	26609.5	3167.4	8474.07	32215.8	0.976319	0.999951	1	1	-0.698835	-0.413116	-0.566122	2.13527e-05	4.2387e-13	5.73494e-08
Q9Y2T3	3	3	239.45	Guanine deaminase OS=Homo sapiens GN=GDA PE=1 SV=1 - [GUAD_HUMAN]	88254	89690.2	80644.3	60829.1	59488.4	70573.6	52976.1	66051.2	48301.4	34655.5	33816.8	40988.8	78617.5	70781	63229.4	51851.5	55417.3	103255	61227.7	74451.6	52446.1	48712.6	52677.4	51153.8	1.90852e-07	0.000959856	0.999999	0.453938	-0.699465	-0.0870812	-0.399884	3.01779	2.39583e-07	0.343003
O15446	3	3	144.11	DNA-directed RNA polymerase I subunit RPA34 OS=Homo sapiens GN=CD3EAP PE=1 SV=1 - [RPA34_HUMAN]	38311.5	45976.4	33905.1	71726.5	72501.4	47040.6	63479.6	60471.4	68344.2	89649.3	89373.6	81771.3	51179.8	60776.2	40963.3	80370.3	65406.8	54915.7	53473.8	56198.3	73965.6	69343.5	72390.8	76514	7.94943e-06	0.0291158	0.993885	0.393624	0.550036	0.192408	0.377026	1.53587	0.00266392	0.404918
P53365	3	3	159.26	Arfaptin-2 OS=Homo sapiens GN=ARFIP2 PE=1 SV=1 - [ARFP2_HUMAN]	22069	23863	19802.5	19993	23683.5	30792.4	15127.3	14483.7	7247.59	8584.89	9309.83	10211	15238.8	15442.1	19337	19255.4	18659.7	27525.3	10551.9	14914.7	11641.1	13807.3	16801.8	18247.1	8.20855e-19	3.06544e-07	0.961036	0.00830077	-1.1098	-0.280149	-0.705718	6.51351	0.0172603	2.08088
P13797	6	3	359.74	Plastin-3 OS=Homo sapiens GN=PLS3 PE=1 SV=4 - [PLST_HUMAN]	55950.4	75052.6	59932.4	48970.1	51409.3	94166.9	51770.2	60724.9	39910	34641	34794.8	47960.5	53114	48265.6	68950.7	43601.8	41258.8	72414.4	46786.6	44221.1	52855.6	35339.6	63851.9	56104.4	0.0340284	0.436448	0.999163	0.928404	-0.514764	-0.234704	-0.365747	0.360068	0.000363543	0.0322631
Q12824	3	3	81.56	SWI/SNF-related matrix-associated actin-dependent regulator of chromatin subfamily B member 1 OS=Homo sapiens GN=SMARCB1 PE=1 SV=2 - [SNF5_HUMAN]	16590.8	15444.8	6987.36	16662.4	12553.1	15305.7	31534.7	26467	30560.8	29954.5	24668.8	29588	17197.5	12917.5	12762.9	25633.6	14017.7	15731.1	21976.2	18232.9	27609.2	21637.5	16132	22388.3	1.91324e-11	1.98724e-06	0.994354	0.0360109	1.04827	0.23407	0.615263	5.70175	0.00245886	1.44357
P30405	3	3	186.54	Peptidyl-prolyl cis-trans isomerase F, mitochondrial OS=Homo sapiens GN=PPIF PE=1 SV=1 - [PPIF_HUMAN]	66580.9	63750.6	68124.6	64055.6	58721.8	41711.8	82901.3	72124.8	94401.7	78612.2	71442.5	70805.5	83701.5	93431.2	96556	89856.9	65345.9	81427.1	102695	79918.2	83032	79753.1	90244.9	47840.8	2.69728e-07	0.617894	0.179168	0.569627	0.373793	0.491646	0.413716	0.209086	0.74674	0.24441
P17301	3	3	127.9	Integrin alpha-2 OS=Homo sapiens GN=ITGA2 PE=1 SV=1 - [ITA2_HUMAN]	3285.54	4087.75	3245.97	4293.73	4395.89	3605.11	7147.52	3612	8331.94	4960.24	5877.32	6823.52	9621.27	10077	5935.46	11106.1	8584.92	8969.79	7131.2	8379.63	8742.96	5567.24	6405.97	7108.43	3.0688e-08	0.681258	0.00358688	0.118036	0.681615	1.24458	0.919318	0.166688	2.44528	0.927985
Q9Y6G9	3	3	248.96	Cytoplasmic dynein 1 light intermediate chain 1 OS=Homo sapiens GN=DYNC1LI1 PE=1 SV=3 - [DC1L1_HUMAN]	23847.3	19686.5	29458	16162.9	19835.6	25782.2	15264.6	9693.65	10329.3	10648.9	7259.21	9053.14	17625.1	14481.7	22727.2	14269.9	15909.6	17260.2	12282.7	12261.5	10748.6	18049.4	15080.9	13336.4	2.37054e-22	8.41885e-08	0.607384	0.00344071	-1.11441	-0.398092	-0.721069	7.07475	0.216537	2.46335
Q15417	5	3	304.46	Calponin-3 OS=Homo sapiens GN=CNN3 PE=1 SV=1 - [CNN3_HUMAN]	80454.4	77315.8	67471.8	55841.4	64483.4	54772.2	51837.1	72761.3	62994.9	52842.3	65230.4	64146.7	77594.1	68114.4	65125.5	59738	64553	61225.5	77596.6	65289.1	62111.8	57569.8	67116.7	54028.3	0.000287688	0.999992	1	1	-0.114428	-0.014445	-0.0611975	3.65006e-06	0	9.60864e-11
Q92785	3	3	183.44	Zinc finger protein ubi-d4 OS=Homo sapiens GN=DPF2 PE=1 SV=2 - [REQU_HUMAN]	19085.2	21927.1	6800.09	23031.3	20539.1	23723	24692.9	25604.9	18441.5	31103.5	22464.6	25457.5	16608.3	14811.4	10546	21632.4	14246.4	20719.4	12920.5	18373.8	20805.2	15127.4	26392.7	26683.9	6.45066e-10	0.663379	0.999995	1	0.360343	-0.223829	0.0637185	0.178238	2.01868e-06	3.17631e-08
Q9GZP4	3	3	88.4	PITH domain-containing protein 1 OS=Homo sapiens GN=PITHD1 PE=1 SV=1 - [PITH1_HUMAN]	11334.8	13920.8	10163.1	14454	14499.8	16611.7	6251.21	8870.37	8194.95	7076.69	8011.44	7147.2	8652.88	7501.28	6923.89	5759.89	11636.7	9970.55	4773.29	10169.9	4506.84	11985.6	10013.7	8605.15	0.000495794	0.0994687	0.29543	0.162855	-0.830132	-0.682924	-0.694144	1.00231	0.529545	0.7882
Q04206	3	3	159.89	Transcription factor p65 OS=Homo sapiens GN=RELA PE=1 SV=2 - [TF65_HUMAN]	16727.4	14605.9	13477.8	8669.62	10271.5	20963.7	8566.61	10310.1	3046.2	2375.38	1791.56	6771.21	6570.8	8451.7	9920.74	8718.72	3243.01	16008.7	8676.51	9448.04	4788.25	1876.19	8193.28	12210.6	3.87716e-08	0.00436026	0.815723	0.28366	-1.36626	-0.678994	-0.90654	2.36049	0.0884575	0.547202
Q9Y520	3	3	157.65	Protein PRRC2C OS=Homo sapiens GN=PRRC2C PE=1 SV=4 - [PRC2C_HUMAN]	17435.2	14920.3	10471	9383.56	15286.7	22311.8	12706.7	8288.27	3921.5	6569.64	7113.12	8472.24	9559.55	10169.9	7126.99	10873.1	7159.03	12151	5492.57	5436.75	11338.3	10688.4	10260.9	12089	1.43451e-25	0.00513278	0.331475	0.137919	-0.932	-0.65489	-0.699421	2.28965	0.479549	0.860375
Q9ULC4	3	3	155.18	Malignant T-cell-amplified sequence 1 OS=Homo sapiens GN=MCTS1 PE=1 SV=1 - [MCTS1_HUMAN]	11409.9	13362.6	9977.48	7592.91	5819.88	5474.05	10903.8	19400.5	12786.7	15911.4	11572.4	8578.88	12561.6	18282.3	10337.5	12083	10585.3	5422.06	14414	15199.2	8691.13	11609.5	15911.2	5391.72	0.00201216	0.949758	0.999788	0.999323	0.561434	0.369044	0.408993	0.0223872	9.19995e-05	0.000293971
Q8N392	4	3	185.56	Rho GTPase-activating protein 18 OS=Homo sapiens GN=ARHGAP18 PE=1 SV=3 - [RHG18_HUMAN]	24275.4	26151.5	21836.7	26045.8	28637.1	35751	12109.5	16713.3	12230.9	15708.4	10784.6	12880	11615.2	16552.3	13075	15528.3	16851.8	21054	13015.6	18044.5	17402.7	14381	16637.5	14652.1	3.7129e-25	6.0667e-07	0.00029632	0.000364611	-1.01644	-0.781112	-0.789414	6.21705	3.52824	3.43817
P49189	3	3	64.73	4-trimethylaminobutyraldehyde dehydrogenase OS=Homo sapiens GN=ALDH9A1 PE=1 SV=3 - [AL9A1_HUMAN]	21683.7	27497.2	24028.8	28029.6	24266.8	27043.6	18593.8	16852.2	13914.6	14982.8	11995.7	16649.8	19078.7	20917.4	26610	20192.3	18537.9	22678.5	18355.2	20853.2	17930.9	21269.9	17696	17601.7	6.93985e-08	8.50563e-05	0.897433	0.162608	-0.71415	-0.252969	-0.42396	4.07029	0.0469978	0.788857
Q14C86	3	3	130.63	GTPase-activating protein and VPS9 domain-containing protein 1 OS=Homo sapiens GN=GAPVD1 PE=1 SV=2 - [GAPD1_HUMAN]	19007.9	18302.3	17253.7	17937.9	21585.2	20200.3	17344.3	10752.5	9206.77	6840.57	17555	13539.5	12869.2	16106.5	18265.7	15875.6	16341.5	17379.3	18828.5	7893.65	12044	16141.1	18244.9	15479.7	7.77617e-06	0.264979	0.999848	0.935143	-0.60312	-0.239023	-0.36677	0.576788	6.61944e-05	0.0291222
P49770	3	3	191.95	Translation initiation factor eIF-2B subunit beta OS=Homo sapiens GN=EIF2B2 PE=1 SV=3 - [EI2BB_HUMAN]	13856.5	13966.1	10571	13837	13246.4	15573.2	11539.5	11820.8	7546.92	8037.56	7136.81	7570.09	11635.5	11378.3	12641.4	10300.7	9881.53	14419.4	8608.98	12338.9	10081.4	8979.34	10683.8	13128.2	7.85784e-13	0.0367531	0.998573	0.803979	-0.59519	-0.206176	-0.344795	1.43471	0.000620021	0.0947555
O75530	3	3	87.57	Polycomb protein EED OS=Homo sapiens GN=EED PE=1 SV=2 - [EED_HUMAN]	5486.75	5049.74	7532.69	8504.1	8720.81	6016.44	7127.09	8751.04	8843.17	9340.19	9659.83	6371.21	5207.13	7132.19	6932.87	9026.91	9051.1	4582.19	7929.3	6289.81	10753.2	9072.14	5922.58	5135.39	3.41982e-10	0.994619	1	1	0.278086	0.0215556	0.126695	0.00234346	0	2.49131e-09
Q9NY61	3	3	146.53	Protein AATF OS=Homo sapiens GN=AATF PE=1 SV=1 - [AATF_HUMAN]	9391.01	7350.58	6219.58	9711.27	7110.58	4403.98	24443.8	27941.2	29113.2	21771.8	23211.8	29475.4	15940.8	16834.5	12640.8	14744.6	8198.59	12673	28533.6	14927	15376.4	11970.2	14077	12251.3	1.27285e-09	2.59258e-06	0.247019	0.0347171	1.81946	0.874875	1.13638	5.58627	0.607269	1.45946
Q00765	3	3	109.01	Receptor expression-enhancing protein 5 OS=Homo sapiens GN=REEP5 PE=1 SV=3 - [REEP5_HUMAN]	35891.4	37749.4	33304.8	44682	32306.2	39083.9	31233.2	40044.7	22548.2	35694.7	26409.2	22872.2	27439.8	33375.8	34695.8	36249.5	26070.1	29650.5	28822.8	43922.8	36872.3	28233.4	27880.6	25105.4	1.66725e-06	0.785943	0.981902	0.987169	-0.318793	-0.250409	-0.224814	0.104609	0.00793185	0.00560835
Q96FW1	3	3	168.77	Ubiquitin thioesterase OTUB1 OS=Homo sapiens GN=OTUB1 PE=1 SV=2 - [OTUB1_HUMAN]	40278.1	47809.8	45918.8	42794.9	53472.5	79134.8	24986.5	31921	18360.1	19747.6	28510.6	35825.9	49063.4	26731.6	43649.5	24904.8	29718	63977.5	38495.6	26165.1	22922.9	32159.7	45169.4	55543.4	2.93767e-11	0.0113532	0.934432	0.752798	-0.9573	-0.378283	-0.489024	1.94488	0.0294521	0.123322
O95163	3	3	186.25	Elongator complex protein 1 OS=Homo sapiens GN=IKBKAP PE=1 SV=3 - [ELP1_HUMAN]	27741.7	23916.6	21461.2	14197.5	17961.1	31849.9	15750.9	17015	8050.92	7367.41	9145.62	16244.7	13552.2	12318.2	13701.8	8381.61	13028.1	20705.2	12088.4	19627.1	14213.4	10860.7	17101.5	16941.5	5.76279e-14	0.00749605	0.0973704	0.483088	-0.898245	-0.747344	-0.594242	2.12517	1.01157	0.315974
Q7Z417	3	3	143.19	Nuclear fragile X mental retardation-interacting protein 2 OS=Homo sapiens GN=NUFIP2 PE=1 SV=1 - [NUFP2_HUMAN]	19730.5	27833.8	22334.3	35498.1	37831.7	44604.8	24211.9	18270.8	22896	28343.8	27528.5	33489	18973.2	25348.5	22299.4	16126.8	31668.7	42279.5	18333.9	21926.9	22999.6	30574.9	34371.2	36028.3	0.000130703	0.999948	0.999725	1	-0.279605	-0.261483	-0.193692	2.27886e-05	0.000119258	2.12155e-07
Q9BSC4	3	3	88.93	Nucleolar protein 10 OS=Homo sapiens GN=NOL10 PE=1 SV=1 - [NOL10_HUMAN]	2104.21	2295.7	1598.32	5682.55	2998.21	2257.65	8573.15	7402.82	10561.3	14530.3	12263.7	13405.9	7266.55	6603.94	5355.55	9538.49	6568.72	6769.61	4320.9	1645.98	9986.73	8689.58	7191.73	5666.68	1.20259e-05	1.52579e-06	0.00456825	0.122198	1.97834	1.31377	1.1468	5.81651	2.34025	0.912934
P30043	3	3	156.23	Flavin reductase (NADPH) OS=Homo sapiens GN=BLVRB PE=1 SV=3 - [BLVRB_HUMAN]	30905.6	36754.6	20019.8	18326.3	20439.4	33952.5	53729.2	62770.8	33347.9	19195.6	27440	46763	26888.9	30887.9	26890.5	15410.9	19456	32002.8	32846.5	43142.2	34145.7	21202.6	27279.6	22744.9	1.65772e-06	0.707037	1	0.999997	0.600761	-0.0819884	0.17721	0.150558	0	1.2545e-06
Q9NP81	3	3	198.39	Serine--tRNA ligase, mitochondrial OS=Homo sapiens GN=SARS2 PE=1 SV=1 - [SYSM_HUMAN]	28559.9	32559	24852.6	34165.5	30436.8	32227.1	21011.3	22318.2	11637.1	21515.6	17861.6	21489	32618.6	24679.7	29969.4	35193.2	18814.3	31329.5	25512.3	27244.7	26230.7	25772.1	24637.3	24506.3	9.222e-07	0.0262789	1	0.996508	-0.658228	-0.0828018	-0.248247	1.58039	1.24447e-08	0.00151935
P47755	6	3	303.62	F-actin-capping protein subunit alpha-2 OS=Homo sapiens GN=CAPZA2 PE=1 SV=3 - [CAZA2_HUMAN]	49053.1	58257.3	52960.4	51902	65576	91250	40418.5	51188.5	30513	33601.5	52158.1	52426.2	39251.5	39705.5	41584.4	28749	43880.4	66281.2	38175.4	49139.4	38535.4	46798.5	60673.5	59387.6	3.33264e-08	0.245624	0.199981	0.902226	-0.503408	-0.508149	-0.334145	0.609729	0.699012	0.0446846
Q06124	3	3	207.76	Tyrosine-protein phosphatase non-receptor type 11 OS=Homo sapiens GN=PTPN11 PE=1 SV=2 - [PTN11_HUMAN]	44430.3	51600	40460.6	36684.3	49592.1	61924.9	32128.4	37960.5	21084.5	21975	23563.5	30748.1	23094.5	29896.8	28864	22503.4	26477.4	38792.4	31173	40842.8	33902.4	26346	32544.2	36917	2.23196e-09	0.00243262	0.00438563	0.311718	-0.765587	-0.747025	-0.497009	2.61393	2.35797	0.506239
O15143	3	3	213.93	Actin-related protein 2/3 complex subunit 1B OS=Homo sapiens GN=ARPC1B PE=1 SV=3 - [ARC1B_HUMAN]	37343	47889.7	31448.6	43274.5	41957.6	48195.8	30499.3	34860.7	28131.5	29371.1	32237.4	28536.8	30308.5	37637.9	35536.7	34861.3	39995.4	38002.8	33811.4	35823.7	40284.5	37935.5	34586.9	33920.3	2.13235e-08	0.155106	0.991939	0.99301	-0.445704	-0.20924	-0.209109	0.809373	0.00351515	0.00304637
P56556	3	3	45.42	NADH dehydrogenase [ubiquinone] 1 alpha subcomplex subunit 6 OS=Homo sapiens GN=NDUFA6 PE=1 SV=3 - [NDUA6_HUMAN]	2717.11	2851.43	1115.01	6147.46	4685.74	3584.5	2803.92	3218.98	3458.86	3613.06	5318.19	3256.62	2645.96	3784.57	3604.71	4521.35	5395.13	2519.14	3371.25	2076.93	4163.35	5841.71	3459.38	2796.01	0.0187333	1	1	1	0.0383456	0.0907265	0.0409396	2.03239e-08	2.07939e-07	4.04755e-10
P50914	5	3	262.87	60S ribosomal protein L14 OS=Homo sapiens GN=RPL14 PE=1 SV=4 - [RL14_HUMAN]	189128	149704	196075	125705	114248	137948	217126	148120	342165	148829	225116	270640	206896	227116	150725	189969	241250	166307	212631	183451	208405	218212	132387	166241	6.28727e-08	0.577075	0.947283	0.99432	0.566708	0.373168	0.296824	0.238768	0.0235201	0.00247396
P54105	3	3	171.28	Methylosome subunit pICln OS=Homo sapiens GN=CLNS1A PE=1 SV=1 - [ICLN_HUMAN]	164181	216130	123772	154319	218500	245131	161657	165199	121906	115807	101452	155462	171526	131554	163950	133173	137284	183105	114974	165507	150911	163172	208678	152380	1.36903e-05	0.231111	0.944867	0.990839	-0.449812	-0.28548	-0.231603	0.636179	0.0246292	0.00399711
Q69YN2	3	3	208.03	CWF19-like protein 1 OS=Homo sapiens GN=CWF19L1 PE=1 SV=2 - [C19L1_HUMAN]	6144.74	6004.29	7528.94	5746.69	6050.22	8109.64	5802.8	5649.46	4219.43	2544.21	5350.09	5463.26	4256.81	4506.18	4313.63	4368.6	5370.21	5128.11	4332.53	5057.05	6206.33	5214.7	5160.36	6248.35	1.46948e-05	0.647689	0.620438	0.99341	-0.447429	-0.502422	-0.29701	0.188633	0.207302	0.00287157
P49840	3	3	67.55	Glycogen synthase kinase-3 alpha OS=Homo sapiens GN=GSK3A PE=1 SV=2 - [GSK3A_HUMAN]	6052.28	10646.9	6379.64	7092.31	9225.62	14150.6	6110.99	7563.61	3217.38	5582.79	5689.81	7087.96	5070.86	5872.22	3673.12	4438.02	3116.02	6003.63	3585.35	9315.65	6022.2	5242.95	5859.6	8424.69	1.70669e-12	0.328966	0.00500307	0.684222	-0.603088	-0.926457	-0.477815	0.482849	2.30076	0.164803
Q6NVY1	3	3	117.16	3-hydroxyisobutyryl-CoA hydrolase, mitochondrial OS=Homo sapiens GN=HIBCH PE=1 SV=2 - [HIBCH_HUMAN]	10809.6	12402.5	10249.3	10900.2	8867.13	11396.1	11732.5	15731.5	11896.3	13275.2	8114.99	9493.48	13716.8	13373.6	16235.5	13119.9	9551.81	12348.5	13214.2	12816.4	15350.1	7553.79	10325.1	10988.1	2.02629e-09	1	0.993121	1	0.120285	0.277775	0.120361	1.26222e-09	0.00299774	9.11971e-10
P78417	6	3	247.57	Glutathione S-transferase omega-1 OS=Homo sapiens GN=GSTO1 PE=1 SV=2 - [GSTO1_HUMAN]	133436	148282	109814	135790	147788	174062	102249	115994	82172.6	86497.1	96510.6	87384.2	108582	110993	107782	94967.1	108060	119816	111001	128160	104632	98006.3	138748	114511	0.00098159	0.214276	0.86768	0.987579	-0.573053	-0.385173	-0.288921	0.669026	0.0616404	0.00542821
Q9H6T3	3	3	179.69	RNA polymerase II-associated protein 3 OS=Homo sapiens GN=RPAP3 PE=1 SV=2 - [RPAP3_HUMAN]	28082.5	35351	27362.5	31896.4	35263.9	45520.8	28733.2	23762.3	13012.5	23494.1	23185	29437.8	24356.7	19651	21528.9	22621	24396.5	38704.1	24973.1	24962.8	29836.5	18209.6	35723.1	33114.4	1.3731e-05	0.109605	0.414589	0.93638	-0.52279	-0.427852	-0.286578	0.96017	0.382383	0.0285478
Q6ZRP7	3	3	135.34	Sulfhydryl oxidase 2 OS=Homo sapiens GN=QSOX2 PE=1 SV=3 - [QSOX2_HUMAN]	3717.38	2123.35	2218.25	6962.63	4928.35	2333.45	8253.87	7131.61	5617.17	5548.64	7142.61	7528.86	6826.71	6893.71	3236.3	9241.8	6070.98	5440.35	5649.21	4106.97	4305.63	4645.57	7208.83	5286.56	0.0155587	0.0631555	0.279995	0.813737	0.887471	0.758971	0.485704	1.19959	0.55285	0.0895157
Q02218	5	3	215.02	2-oxoglutarate dehydrogenase, mitochondrial OS=Homo sapiens GN=OGDH PE=1 SV=3 - [ODO1_HUMAN]	15475.1	9905.55	16913.4	11695.3	11785	18461.7	23533	18432	16779.1	7365.17	7583.99	13787.5	33041.7	27822.9	33929.8	37086.3	16281.2	29619.3	20028.7	18502.1	17428.7	18117	13108.1	18806.6	1.77028e-05	1	0.0131979	0.996701	0.054528	1.07759	0.331435	0	1.87949	0.00143491
P11802	4	3	137.79	Cyclin-dependent kinase 4 OS=Homo sapiens GN=CDK4 PE=1 SV=2 - [CDK4_HUMAN]	3779.67	6988.38	5373.73	7462.68	7675.64	5327.64	6505.38	9155.7	4735.08	3380.72	5919.46	7790.66	5886.39	5152.15	4895.56	4897.05	4994.06	5906.42	4390.5	3636.1	7096.64	5627.63	6967.95	7636.61	0.000372403	1	1	1	0.0342419	-0.206227	-0.0502163	0	2.26075e-10	0
Q9UK22	3	3	195.79	F-box only protein 2 OS=Homo sapiens GN=FBXO2 PE=1 SV=2 - [FBX2_HUMAN]	38154.1	40045.9	29349.7	28880.2	36111.9	45726.7	23184.2	32969.8	21820	17552.1	14515.2	28313.3	43390.2	40131.2	41110.4	35735.2	33954.9	57391.8	30971.5	45213.5	33741	21481.2	27997.2	39801.3	1.92042e-11	0.0992851	0.999934	0.999999	-0.657735	0.20568	-0.131846	1.00312	2.85716e-05	4.69982e-07
Q9NY93	3	3	113.96	Probable ATP-dependent RNA helicase DDX56 OS=Homo sapiens GN=DDX56 PE=1 SV=1 - [DDX56_HUMAN]	10578	11111.6	8911.22	15646.6	13676.5	8523.35	18301	20397.5	30483.7	33814.1	26728.4	24805.3	14214.8	14086.3	8782.54	14183.7	15824	8882.01	17476.9	12267.5	14296.5	16354.8	13512	15237.4	2.6057e-18	1.10707e-08	0.999975	0.501111	1.17482	0.150501	0.381165	7.95583	1.09701e-05	0.300066
O14787	5	3	309.2	Transportin-2 OS=Homo sapiens GN=TNPO2 PE=1 SV=3 - [TNPO2_HUMAN]	30000	43168	23956.7	16616.4	22307.1	40398.3	22961.2	27488.6	16729.2	13465.8	17553	21162.5	42608.7	30440.8	26973.5	16881	20784.1	32809	22397.2	31553.8	26253.1	22233.2	23925.5	30837.9	8.27141e-05	0.730715	1	1	-0.563905	-0.049483	-0.166622	0.136252	0	1.00548e-10
P19525	3	3	213.37	Interferon-induced, double-stranded RNA-activated protein kinase OS=Homo sapiens GN=EIF2AK2 PE=1 SV=2 - [E2AK2_HUMAN]	9648.55	8863.56	11122.9	10559.6	11661.6	12904.7	10691.2	10700.9	18573.3	12748.5	16134.7	15539.3	23262.6	19616.3	12219.2	11311.8	18837.2	16975.3	13102	11506.4	13762	13480.8	8779.22	17330.2	8.00572e-11	0.837344	0.0594496	0.994038	0.381912	0.658518	0.267624	0.077096	1.22585	0.00259707
P09525	3	3	205.14	Annexin A4 OS=Homo sapiens GN=ANXA4 PE=1 SV=4 - [ANXA4_HUMAN]	16464.5	5179.09	12880.7	10988.2	11229.8	10950.2	15502.6	5661.2	16859.7	9126.08	9956.85	15540	20493.7	21698.9	23755.3	27010.5	39996.3	21193.2	18847.7	17852.7	12478.6	16253.9	10104.2	9381.32	0.00237599	1	0.44586	0.999998	0.101898	1.18725	0.327083	0	0.350801	6.96524e-07
Q09028	7	3	295.93	Histone-binding protein RBBP4 OS=Homo sapiens GN=RBBP4 PE=1 SV=3 - [RBBP4_HUMAN]	63943.2	65726.4	65141.5	102309	70763.5	84549.3	117217	70491.4	87017.9	96673.5	87516.8	94713.8	89324	64056	90806.4	95948.7	71740	84732.5	72888	63223.5	79090.4	74677	115938	81571.4	5.15218e-10	0.968848	0.999997	1	0.291219	0.134401	0.107367	0.0137441	1.43737e-06	1.02467e-08
O95433	3	3	132.01	Activator of 90 kDa heat shock protein ATPase homolog 1 OS=Homo sapiens GN=AHSA1 PE=1 SV=1 - [AHSA1_HUMAN]	162417	191027	132859	166529	172365	201295	117390	139739	82432.3	100610	101879	98925.1	129488	129077	105517	112825	119040	141724	134264	162979	121858	132151	162325	136491	2.53772e-15	3.5095e-06	0.0073091	0.616035	-0.67938	-0.476672	-0.272072	5.45475	2.13614	0.210394
O15212	3	3	142.12	Prefoldin subunit 6 OS=Homo sapiens GN=PFDN6 PE=1 SV=1 - [PFD6_HUMAN]	83110	86186.2	66660.3	106768	90380.8	94384.9	65120.2	70956	51957.5	62091.1	76042.3	61378	54383.9	54420.4	53067.1	65321.7	67477.2	64672.7	73143.5	71208.1	67507.7	71164.4	97258.3	71768.2	4.11976e-09	0.0734528	0.00544777	0.957604	-0.444779	-0.553782	-0.222661	1.13399	2.26378	0.0188142
O14974	3	3	153.75	Protein phosphatase 1 regulatory subunit 12A OS=Homo sapiens GN=PPP1R12A PE=1 SV=1 - [MYPT1_HUMAN]	15136.2	18220.2	19299.4	18759.6	17699.5	20823.9	13179.6	15648	13287.9	17086.7	13724.6	13163.8	15242.7	14252.8	17525.2	17437	13028.3	16608.7	15518.1	18050.6	15708.7	14765.1	17793.7	18768.5	0.00873908	0.638031	0.987692	0.999992	-0.352773	-0.224517	-0.128002	0.195158	0.00537868	3.57895e-06
Q9NQR4	3	3	229.76	Omega-amidase NIT2 OS=Homo sapiens GN=NIT2 PE=1 SV=1 - [NIT2_HUMAN]	43911.9	52125.5	39215.9	40995	52059.7	62678.7	45635	39976.8	26695.4	25067.9	28754.5	34086.8	35703.3	35825.7	38685.3	35590.9	38933	52530.6	35851.1	43997.6	35235	33668.2	58031.8	49772.2	2.05537e-06	0.054159	0.918277	0.998733	-0.539393	-0.294431	-0.18168	1.26633	0.0370265	0.000550562
P46379	3	3	179.24	Large proline-rich protein BAG6 OS=Homo sapiens GN=BAG6 PE=1 SV=2 - [BAG6_HUMAN]	37178.6	36561.1	37650.1	42789.2	52596.7	45881.4	32661	38489.9	26102.3	37355.8	27215.6	35029.3	25249.3	31215.9	30967	35641.9	24858.4	36724.3	31390.9	33731.3	37491.5	36627.3	44110.1	40558.3	7.20601e-06	0.479815	0.128548	0.998989	-0.360054	-0.452334	-0.174266	0.318927	0.890933	0.000439208
O15160	3	3	146.39	DNA-directed RNA polymerases I and III subunit RPAC1 OS=Homo sapiens GN=POLR1C PE=1 SV=1 - [RPAC1_HUMAN]	46017.6	77429.4	55311.7	48790.2	71874.8	95628.7	66379.6	57954.2	52149.8	61229.8	52258.4	50344.6	44186.8	46637.5	42268	67993.2	44526.2	50842.6	68731.3	63608.9	61488.2	58890.6	55167.2	52767	0.00184766	0.99971	0.57516	1	-0.215167	-0.414234	-0.131432	0.000125889	0.240212	5.18052e-09
Q00534	4	3	201.18	Cyclin-dependent kinase 6 OS=Homo sapiens GN=CDK6 PE=1 SV=1 - [CDK6_HUMAN]	23808.3	29604.7	14319.6	14146.4	15858.1	25241.3	21659.7	30327.2	19561.8	14516.5	10048.5	22933	21291.1	29085.7	12616.2	10896.9	12267.5	23554.5	18954.4	30863	19693.6	9980.64	12731.3	27146.5	1.44912e-07	1	1	1	-0.0468782	-0.164684	-0.0429704	0	4.60638e-08	0
Q14146	4	3	189.66	Unhealthy ribosome biogenesis protein 2 homolog OS=Homo sapiens GN=URB2 PE=1 SV=2 - [URB2_HUMAN]	12925.3	13339	12724.3	11267.6	11328.4	11839.9	14995	13687.4	13314.9	14307.5	8393.21	15352.1	12249.3	16817.4	16769	15041.9	8892.47	13331.1	18378.8	11733.6	13578	9386.84	10179.6	13241.1	0.654402	1	0.999993	1	0.12464	0.178608	0.0591599	8.02486e-09	3.20032e-06	0
P49773	3	3	104.27	Histidine triad nucleotide-binding protein 1 OS=Homo sapiens GN=HINT1 PE=1 SV=2 - [HINT1_HUMAN]	87531.2	59738.6	99446.5	193235	208862	101923	66538.4	44188.8	59360.4	135658	162150	56271.1	64164.1	35092.1	73616.6	115523	160280	67747	69395.8	55689.3	89181.9	205746	162733	70128.9	0.446032	0.990891	0.989168	1	-0.518281	-0.539757	-0.201501	0.00397405	0.00472975	3.29844e-08
P35269	4	3	250.69	General transcription factor IIF subunit 1 OS=Homo sapiens GN=GTF2F1 PE=1 SV=2 - [T2FA_HUMAN]	28378.9	41920.8	23858.1	14471.9	24947	43703.7	28383.4	38192.5	19665.4	11052	12179.1	28435.9	21662	27507	22128	9454.89	12411	31213.9	34291.6	40671.8	18570.5	9583.59	21518.9	33846.3	0.061476	0.997779	0.963406	1	-0.362323	-0.511315	-0.161708	0.000965554	0.0161907	1.59848e-07
P06730	3	3	117.66	Eukaryotic translation initiation factor 4E OS=Homo sapiens GN=EIF4E PE=1 SV=2 - [IF4E_HUMAN]	44623.3	53416.5	49774.5	69797.6	60776.7	63306.6	41248.9	37266.4	32358.7	39960.3	43115.2	36503	31661.6	38614.7	41858.5	56867	48390.1	47035.2	39685.5	49841.3	55591.5	61590.2	51738.2	44901.3	6.60276e-07	0.0361744	0.532297	0.999597	-0.568241	-0.36984	-0.171736	1.4416	0.273846	0.00017499
Q9BXS5	4	3	146.86	AP-1 complex subunit mu-1 OS=Homo sapiens GN=AP1M1 PE=1 SV=3 - [AP1M1_HUMAN]	21726.4	27174.3	12304.6	20206.8	19296.1	19242.9	15077.4	18549.6	20732.6	20326	16113.4	15611.6	30061.3	15791.2	11088.9	15677.9	14646.9	16730	21965.4	17790.4	17853.9	17435.4	22207	17340.9	0.105339	0.999955	0.983443	1	-0.172805	-0.205918	-0.0659302	1.93513e-05	0.00725084	0
Q9Y2L1	3	3	141.69	Exosome complex exonuclease RRP44 OS=Homo sapiens GN=DIS3 PE=1 SV=2 - [RRP44_HUMAN]	48885.5	62028.9	44062.2	48443.1	62292.9	71011.7	41677.5	53720.1	41514.2	46741	47248.2	49236	40314.9	44256.8	43331.2	39955.6	42048.4	52677.9	51012.5	56695.7	51022.8	54093	45685.9	54974	1.29482e-17	0.641947	0.128978	0.999996	-0.265435	-0.358785	-0.103177	0.192501	0.889484	1.69328e-06
P23193	4	3	242.03	Transcription elongation factor A protein 1 OS=Homo sapiens GN=TCEA1 PE=1 SV=2 - [TCEA1_HUMAN]	60106.4	75353.9	50656.7	91704.9	85338.5	97821.1	62278.9	70904.1	41549.2	66968.5	75499.5	57274.2	36798.2	44324.7	36511.8	49437	46621.9	50541	63698.4	64441.8	60318.8	77656.1	71737.1	76212.9	1.61068e-07	0.9573	0.00145158	0.999999	-0.299842	-0.802889	-0.154852	0.0189521	2.83816	4.63158e-07
Q16851	3	3	109.02	UTP--glucose-1-phosphate uridylyltransferase OS=Homo sapiens GN=UGP2 PE=1 SV=5 - [UGPA_HUMAN]	69236.9	51578.8	62756.4	92522.4	93132.9	67678.1	52539.1	48493.1	44034.4	79522.6	86534.6	47591.9	53338.1	53706.6	56097.5	90895.5	93674.5	58405.2	51171.2	62537.3	63602.5	99583.2	88585.6	55832.8	0.739026	0.995868	1	1	-0.284481	-0.105425	-0.0524307	0.00179843	2.54979e-09	0
Q6NUM9	3	3	133.01	All-trans-retinol 13,14-reductase OS=Homo sapiens GN=RETSAT PE=1 SV=2 - [RETST_HUMAN]	7244.47	8209.58	10741.4	12833	10357.3	8527.9	12544.1	14331.7	10501.3	14400.2	10980.5	13527.8	21104.9	21549.2	24374.7	25086.1	15946.9	19194.7	9012.58	10311.4	11048.2	11121	11586.8	12374.7	4.62096e-20	0.855525	3.57893e-05	0.999956	0.397506	1.13576	0.176588	0.0677671	4.44625	1.92713e-05
Q9BVG4	3	3	136.59	Protein PBDC1 OS=Homo sapiens GN=PBDC1 PE=1 SV=1 - [PBDC1_HUMAN]	26671.7	35910.7	23617.3	33304.5	37560.8	42226.7	23589.3	25753.8	13731.5	23103	20714	19504.9	23749.9	29268.2	25157.8	27051.6	25633.4	38411.5	28239.4	29601	27759.1	30906.8	39861	29758.9	2.48933e-20	0.000524567	0.962375	1	-0.656927	-0.235536	-0.0986004	3.2802	0.0166555	2.54364e-08
Q15436	6	3	360.96	Protein transport protein Sec23A OS=Homo sapiens GN=SEC23A PE=1 SV=2 - [SC23A_HUMAN]	8830.98	9507.57	6706.24	5827.7	7167.28	17521.9	9288.87	8837.42	3069.63	0	3824.29	4923.86	5457.39	4975.62	7553	4345.01	6538.9	11632.6	8506.82	10047.7	7172.78	4208.78	9165.12	11754.3	0.151408	0.0874203	1	1	-0.891819	-0.456078	-0.127687	1.05839	1.29161e-09	0
P50750	4	3	158.16	Cyclin-dependent kinase 9 OS=Homo sapiens GN=CDK9 PE=1 SV=3 - [CDK9_HUMAN]	5583.18	9068.58	9065.71	6909.19	6430.96	4410.43	10028.6	10037.3	10345.8	19889	11743.8	8961.73	8898.12	10592.4	12226	15848.1	11978.9	5859.28	7477.96	9365.95	7803.46	10458.9	3833.2	5949.32	0.000180604	0.793144	0.944906	1	0.775944	0.657353	0.114354	0.100648	0.0246114	0
Q92888	3	3	133.25	Rho guanine nucleotide exchange factor 1 OS=Homo sapiens GN=ARHGEF1 PE=1 SV=2 - [ARHG1_HUMAN]	16678.9	29736.6	30728.8	26806.9	25292.8	26142.7	23100.7	17451	16469.7	15928.3	18870.5	18514.7	29108	21062.7	21400.2	21419.5	24907.7	27502.8	27122.3	23246	22269.8	24148.7	34632.8	19327.3	0.00238724	0.499951	1	1	-0.493972	-0.0958268	-0.043734	0.301073	1.05207e-10	0
P53992	3	3	106.09	Protein transport protein Sec24C OS=Homo sapiens GN=SEC24C PE=1 SV=3 - [SC24C_HUMAN]	38614	28862.7	33805.9	26847.8	33199.7	49695.5	20190.3	27011.1	22426.6	19172.2	21825.9	23887.3	31066	19258	34769.6	30838.3	31045	33718.4	15586.7	39757.9	41428.6	25517.2	38845.7	43602.1	1.96101e-05	0.0753975	0.999099	1	-0.649669	-0.223858	-0.0436374	1.12264	0.000391324	3.32798e-09
Q9NRR5	8	3	358.04	Ubiquilin-4 OS=Homo sapiens GN=UBQLN4 PE=1 SV=2 - [UBQL4_HUMAN]	9404.19	13706.7	12823.1	12458	15835.1	14090.2	10578.6	9709.47	8890.81	12617.5	9693.12	9138.04	11234.9	11863.9	16188.8	8735.93	8527.19	15179.4	12588.1	13563.6	12361.2	10021.7	16257.1	13199.5	0.00226508	0.934985	0.999998	1	-0.36936	-0.126754	-0.00602193	0.0291955	7.18672e-07	0
P05091	5	3	320.63	Aldehyde dehydrogenase, mitochondrial OS=Homo sapiens GN=ALDH2 PE=1 SV=2 - [ALDH2_HUMAN]	36339.5	34070.8	32816.7	44555.1	37079.9	45880.9	51531.1	50990.4	32978.4	39653.4	32267.7	42295.9	38946.1	35172.2	43851.9	39873	28818.2	46767.2	41573.8	37598.3	43990.4	26422.7	37485.2	43774.2	1.33616e-08	1	1	1	0.114006	0.0166953	0.000634903	5.37671e-09	0	0
Q9NXF1	3	3	158.79	Testis-expressed sequence 10 protein OS=Homo sapiens GN=TEX10 PE=1 SV=2 - [TEX10_HUMAN]	8625.28	8535.48	12523.6	19585.6	12756.6	5153.09	19567.8	20381.7	16897.4	21203.1	16339.4	18646.2	14553.9	17278.3	17733.1	21658.3	10876.2	13325.1	10886.1	7080.77	10520.8	11565.4	16660.6	10536	0.00278684	0.801661	0.99214	1	0.750682	0.506342	0.00150446	0.0960091	0.00342719	0
P61964	3	3	192.56	WD repeat-containing protein 5 OS=Homo sapiens GN=WDR5 PE=1 SV=1 - [WDR5_HUMAN]	44749.3	40858.7	28329.6	39371.4	36782.2	38530	45701.2	49737.6	42133.1	42696.6	44390.4	51141.5	22930	38930.1	24895.3	30431.1	34204.4	28140.5	38458.4	37069.3	44789.9	33504.6	37121.8	37788.3	0.000452106	0.868263	0.510498	1	0.270665	-0.348724	0.000701407	0.0613489	0.292006	0
P09543	3	3	161.42	2',3'-cyclic-nucleotide 3'-phosphodiesterase OS=Homo sapiens GN=CNP PE=1 SV=2 - [CN37_HUMAN]	10201.7	6297.52	9570.5	9507.97	9892.1	6800.73	27755.2	6001.72	5968.35	7376.5	14756.1	21377	9241.98	7284	9145.98	14604.4	20202.9	14907.5	6313.19	5127.74	4136.61	12522	17531.2	5451.78	1.48368e-06	0.999968	0.999896	1	0.67119	0.528313	-0.0331683	1.39633e-05	4.52146e-05	4.17183e-10
Q5SY16	3	3	169.63	Polynucleotide 5'-hydroxyl-kinase NOL9 OS=Homo sapiens GN=NOL9 PE=1 SV=1 - [NOL9_HUMAN]	1144.2	2040.91	4154.7	14202.6	10330.5	13416	10186.7	7361.13	9928.75	13290.4	7100.83	12620.9	6172.55	11831.9	8351.51	7735.42	8711.55	11974.7	3812.56	8468.31	4686.34	10393.6	6059.74	11269.9	0.00692304	0.333742	0.632923	0.998392	0.417505	0.274427	-0.0191899	0.476589	0.198649	0.000699089
P78346	3	3	240.01	Ribonuclease P protein subunit p30 OS=Homo sapiens GN=RPP30 PE=1 SV=1 - [RPP30_HUMAN]	20034.9	20744.8	24253.8	15816.1	14419.7	16953.5	22517.5	20836.3	22809.6	25001	18617.9	19822.1	24089.4	22506.9	28863.2	21172	17363.1	19245.9	24247.5	17958.3	17427.3	20161.6	16571	14408.3	2.02543e-09	0.994033	0.980149	1	0.207749	0.247665	-0.0187481	0.00259925	0.0087079	0
Q9Y314	3	3	197.84	Nitric oxide synthase-interacting protein OS=Homo sapiens GN=NOSIP PE=1 SV=1 - [NOSIP_HUMAN]	57945.3	69919.3	51095.2	38613.6	50926.4	68659.4	47128.2	55930.7	47124.6	29874.3	33642	61111.6	51677.1	48651.6	54261.9	31053.4	35736.1	67429.8	63652.4	64977.4	58892.3	34574.6	51673.9	69760	1.63623e-07	0.992041	0.999606	1	-0.29499	-0.22331	0.0270078	0.00347028	0.000171116	0
Q8IVS2	3	3	148.2	Malonyl-CoA-acyl carrier protein transacylase, mitochondrial OS=Homo sapiens GN=MCAT PE=1 SV=2 - [FABD_HUMAN]	14666.2	9361.54	12537.4	20144.2	16423.6	9605.81	18480.2	15000.7	17830.3	15747.5	18533.6	15080	17317.6	16245.4	20577.4	27247.2	16928.1	15844.5	15979.6	11240.6	13743.9	10675.2	19907.5	8814.78	2.07857e-07	0.982451	0.667976	1	0.28303	0.464425	-0.042061	0.00768893	0.175239	0
Q8TC12	3	3	168.72	Retinol dehydrogenase 11 OS=Homo sapiens GN=RDH11 PE=1 SV=2 - [RDH11_HUMAN]	25789.3	30849.6	34101.9	42213.5	34220.2	40644.2	35998.8	37161.4	27972.7	41459.2	31246.8	29855.5	16656.9	30470.7	34878.3	45876.7	24583	35442	32715.1	40210.2	36143.8	35417.2	30418.7	34461	0.000106347	1	0.992801	1	-0.0289202	-0.145302	0.0107004	0	0.00313794	0
Q969H8	3	3	149.31	UPF0556 protein C19orf10 OS=Homo sapiens GN=C19orf10 PE=1 SV=1 - [CS010_HUMAN]	106444	106548	79999	194614	142919	124211	92228.4	119031	63233.6	144510	97601.3	83578.6	77804.1	92768.7	102735	146794	89887.9	118432	102286	134990	112891	145625	146370	135292	7.04474e-06	0.799927	0.98212	1	-0.330569	-0.264239	0.042784	0.0969498	0.00783547	7.85741e-09
Q8NFV4	3	3	65.1	Alpha/beta hydrolase domain-containing protein 11 OS=Homo sapiens GN=ABHD11 PE=2 SV=1 - [ABHDB_HUMAN]	6980.14	4104.2	5578.21	8981.32	6932.89	3233.89	5851	4857.16	8144.35	9776.95	9329.58	6070.41	8262.98	7089.41	8445.02	8049.58	8320.18	3070.98	6092.41	5233.92	4549.53	7847.84	6359.26	4224.41	0.0017879	0.999501	0.999956	1	0.29808	0.271916	-0.0618699	0.000216836	1.89068e-05	0
P61803	3	3	129.24	Dolichyl-diphosphooligosaccharide--protein glycosyltransferase subunit DAD1 OS=Homo sapiens GN=DAD1 PE=1 SV=3 - [DAD1_HUMAN]	220347	107583	31171	249584	132092	164210	94780.1	170320	102846	150553	90164.7	102040	63652.3	83111.1	53488.4	191445	98889.4	126260	203400	155075	123376	162507	177470	146886	0.270636	1	0.995674	0.999729	-0.348652	-0.552986	0.0981714	7.91354e-11	0.00188272	0.000117595
Q96FQ6	3	3	185.51	Protein S100-A16 OS=Homo sapiens GN=S100A16 PE=1 SV=1 - [S10AG_HUMAN]	12219.9	9364.11	12724	10345	13360.7	5751.38	11278.8	9891.71	16534.7	12982.2	16235.6	8872.26	22190	17937.4	17199.4	19265.9	26820	10640.2	13485.8	7952.32	9524.98	11725.7	11761.9	3469.69	5.80512e-08	0.999952	0.193799	0.999998	0.24934	0.838864	-0.138696	2.10153e-05	0.712648	6.85984e-07
Q9UK59	3	3	105.86	Lariat debranching enzyme OS=Homo sapiens GN=DBR1 PE=1 SV=2 - [DBR1_HUMAN]	22723.6	30856.3	26843.7	21741.3	25685.3	31484.4	19913.4	23739.2	16895.8	19812.2	17129.8	27003.5	21283.3	21196	21926.9	12216.5	15224.5	27013.7	29606.8	40381.7	27654.8	17471.2	27523.6	29509.3	0.00669886	0.967564	0.81037	1	-0.355984	-0.422785	0.111586	0.0143201	0.0913166	1.5305e-11
P59998	3	3	184.11	Actin-related protein 2/3 complex subunit 4 OS=Homo sapiens GN=ARPC4 PE=1 SV=3 - [ARPC4_HUMAN]	91306.4	99213	81548.9	80680.5	88469.3	104955	72418.9	82121.5	76250.6	73159.5	83796.8	81819.9	91350	92415.4	81504.3	75899.1	85801	94945.4	94761.2	106917	88120	86110.8	93786.6	95742.2	2.61722e-14	0.545975	0.999999	1	-0.218027	-0.0655435	0.0500096	0.262827	4.33876e-07	3.00148e-08
P14174	3	3	92.32	Macrophage migration inhibitory factor OS=Homo sapiens GN=MIF PE=1 SV=4 - [MIF_HUMAN]	395958	430549	358858	428616	481126	475756	387871	418443	289079	326437	376792	320360	358268	405418	361982	324935	354523	438854	427986	578292	394879	391564	520655	414398	7.09285e-08	0.67315	0.978361	1	-0.27888	-0.196193	0.0854721	0.171888	0.00950075	3.62921e-08
P06396	3	3	220.21	Gelsolin OS=Homo sapiens GN=GSN PE=1 SV=1 - [GELS_HUMAN]	25000.8	23787.3	30001.2	23958.8	33801.3	39749.4	21242.9	22627.2	19200.3	20994.7	24197.2	25366.9	30232.7	24784.4	30330	25662.2	31517.4	45105.7	28232.5	38363.2	21580.4	30046.8	30516.4	35021.9	1.65226e-12	0.866852	1	1	-0.399787	0.0898873	0.0598107	0.062055	3.02782e-10	1.62643e-12
O14773	3	3	158.03	Tripeptidyl-peptidase 1 OS=Homo sapiens GN=TPP1 PE=1 SV=2 - [TPP1_HUMAN]	9588.58	14959	21487.5	6654.41	8416.44	10506.9	18119.6	15609.7	22154.1	11502	13276.9	13947.6	15734.6	16803.2	21512.6	10009.5	12158.4	11270.5	11362.9	12355.6	11715.6	7407.57	11381.2	10075.7	9.59523e-05	0.999998	1	1	0.401772	0.288879	-0.155433	8.40156e-07	6.66061e-09	0
Q9UFC0	3	3	88.34	Leucine-rich repeat and WD repeat-containing protein 1 OS=Homo sapiens GN=LRWD1 PE=1 SV=2 - [LRWD1_HUMAN]	4960.21	5811.03	2999.93	7179.66	5025.63	6334.2	6135.37	7320.36	5789.43	8457.32	5077.57	6152.86	4935.69	5383.29	6392.44	7033.77	3336.01	5642.48	4218.63	4690.36	6345.5	4439.92	4916.18	6269.9	0.000173597	0.989929	1	1	0.26898	0.0183253	-0.0653148	0.00439608	0	0
Q86U90	3	3	177.59	YrdC domain-containing protein, mitochondrial OS=Homo sapiens GN=YRDC PE=1 SV=1 - [YRDC_HUMAN]	31042.4	32712.5	26005.2	36816.7	40674.8	40593.5	43442.9	39231.1	31025.5	34364.7	37194.4	37438.3	20280.5	23093	25471.3	22105.1	24963.8	28917.9	39509.2	40789.1	31496.3	33484.6	41121.9	37440.3	5.57153e-14	0.999986	0.00972102	0.999963	0.0995731	-0.521132	0.106968	5.92897e-06	2.01229	1.62538e-05
Q66K74	3	3	98.85	Microtubule-associated protein 1S OS=Homo sapiens GN=MAP1S PE=1 SV=2 - [MAP1S_HUMAN]	5435.34	4632.4	7233.64	4712.93	5674.13	337.863	6368.83	5542.27	7886.81	3198.94	3679.63	5464.67	11710	6994.44	8966.75	7660.6	5800.97	4551.51	5766.85	2114.7	3103.58	4880.49	5647.83	2037.33	4.84727e-05	1	0.998469	1	0.19764	0.704915	-0.251006	9.15607e-08	0.000665417	0
Q92841	12	3	606.21	Probable ATP-dependent RNA helicase DDX17 OS=Homo sapiens GN=DDX17 PE=1 SV=2 - [DDX17_HUMAN]	102726	96898.8	50092.8	135992	100621	108258	92837.3	100331	68088.3	130329	100864	113324	95728.6	83307.7	53634.9	91542	59987.3	101128	58355.7	127391	82561.7	97960.3	108031	153129	3.85847e-12	1	0.970401	1	0.0268873	-0.29293	0.0775605	4.46802e-12	0.0130489	1.01524e-10
Q9UBQ0	3	3	151.74	Vacuolar protein sorting-associated protein 29 OS=Homo sapiens GN=VPS29 PE=1 SV=1 - [VPS29_HUMAN]	84514.7	93693.8	68637.4	99129.5	90291.3	114525	87869.8	88123.6	64729.3	81229.2	70871.3	80456.5	63152.1	72507	59264.9	105860	69238.6	92905.3	87275.9	106862	100030	101256	114164	100497	7.38991e-09	0.985242	0.888833	0.999351	-0.218815	-0.25072	0.147498	0.00645703	0.0511799	0.000282054
P55735	3	3	250.52	Protein SEC13 homolog OS=Homo sapiens GN=SEC13 PE=1 SV=3 - [SEC13_HUMAN]	129242	194276	113809	155282	129988	186701	154718	152778	108079	136200	127222	145929	138752	138470	117154	117804	110954	169702	177215	164496	157644	140887	158514	188188	1.67725e-07	0.999981	0.996285	0.999879	-0.140488	-0.197732	0.118216	8.22388e-06	0.00161661	5.24953e-05
P26885	3	3	194.17	Peptidyl-prolyl cis-trans isomerase FKBP2 OS=Homo sapiens GN=FKBP2 PE=1 SV=2 - [FKBP2_HUMAN]	76342.6	72502.3	61431.6	70619.7	58617.1	60744.3	60663.5	64349.6	48634.3	70375.2	45977.4	46999.6	61602.2	62430.5	67086.4	64446.4	44948.1	62039.6	80203.7	90555	64932.9	78088.3	70520.9	63495.5	4.68785e-05	0.775245	0.998941	0.997529	-0.248182	-0.142737	0.161914	0.110561	0.000460048	0.00107439
Q16555	4	3	189.69	Dihydropyrimidinase-related protein 2 OS=Homo sapiens GN=DPYSL2 PE=1 SV=1 - [DPYL2_HUMAN]	34199.1	35828.6	29196.4	26136.6	30186.1	46575	34435.7	35440.8	33652.8	20970	21842.7	39237.5	27596.4	29993.2	28854.8	27817.1	29101.7	37909.7	35147.9	40532.9	38184.5	35591.5	35513.2	40723.4	9.44052e-05	0.999945	0.999935	0.998206	-0.123188	-0.157062	0.15914	2.3698e-05	2.80231e-05	0.000779884
Q9UKN8	4	3	154.46	General transcription factor 3C polypeptide 4 OS=Homo sapiens GN=GTF3C4 PE=1 SV=2 - [TF3C4_HUMAN]	13250.5	15193	10002	10527.8	14184.3	14859.5	12261.4	19064.8	12924.3	16964.3	14003.5	14837.5	9091.65	8845.89	10843.1	13589.4	6757.8	9498.26	11680.3	14382.8	15566.6	12233.4	14591.4	16233.5	1.36955e-10	0.998488	0.498837	0.999998	0.207026	-0.412247	0.118367	0.000657057	0.302041	7.28627e-07
Q6P1L8	3	3	164.09	39S ribosomal protein L14, mitochondrial OS=Homo sapiens GN=MRPL14 PE=1 SV=1 - [RM14_HUMAN]	11031.5	8397.81	10757.3	14469.5	11373.4	12783.9	12479	10119.7	12428.1	10978.7	13512.1	10766.4	9630.3	13074.5	12671.8	20189	14083.6	10360.7	9860.31	8737	13350.3	12605.6	9819.74	7693.59	0.331919	1	0.999257	0.999959	0.030504	0.217488	-0.148874	0	0.000322952	1.79874e-05
P48506	3	3	191.46	Glutamate--cysteine ligase catalytic subunit OS=Homo sapiens GN=GCLC PE=1 SV=2 - [GSH1_HUMAN]	21433.6	27339.4	19187.3	14186.5	17106.6	31939.4	34539.7	44874.6	21637	16635.1	18842.3	26776.5	13319.8	14717.8	10474.2	7553.21	8317.89	12716.4	31120.9	40023.5	27314	17147.6	29455.7	29583.5	6.95644e-16	0.993865	0.000852467	0.792991	0.315882	-0.967318	0.412738	0.00267247	3.06932	0.100732
Q13616	5	3	136.84	Cullin-1 OS=Homo sapiens GN=CUL1 PE=1 SV=2 - [CUL1_HUMAN]	29912.3	19577.2	35661.2	12146.7	11833.5	4458.72	27563.8	24210.2	36851.1	18704.6	24501.4	18153.6	40055.9	30631	27258.8	16499.8	26427.7	12362.8	23675.7	14941.8	11793	15437.6	10547	2190.85	3.32205e-07	0.999768	0.999877	0.999988	0.400985	0.431926	-0.531486	0.000100684	5.35255e-05	5.07433e-06
Q9NYK5	3	3	199.8	39S ribosomal protein L39, mitochondrial OS=Homo sapiens GN=MRPL39 PE=1 SV=3 - [RM39_HUMAN]	36470.1	31395.4	37820.4	27460.6	26406.1	24823.3	35516	27432.8	42971.2	26214.4	30907.1	34313.4	33393.3	42381.5	41121.4	32071.1	32915.9	30575.1	33402.7	26689.1	27815.4	26591.7	25191.4	21145.2	0.000196643	1	0.989337	0.996348	0.0981422	0.20453	-0.197064	1.28025e-07	0.0046557	0.00158915
P62312	3	3	82.68	U6 snRNA-associated Sm-like protein LSm6 OS=Homo sapiens GN=LSM6 PE=1 SV=1 - [LSM6_HUMAN]	39601.4	39607.7	42987	44879.8	40565.2	54288.8	50024.1	48353.8	42424.8	49757.3	42390.4	45154.2	19602.1	35454.5	33508	42187	33144.7	38550	54072.6	55137.9	55411.3	41748	42805.6	49465.5	7.28703e-10	0.999999	0.116136	0.984892	0.0864466	-0.371641	0.189231	6.0723e-07	0.935034	0.00661151
Q13868	4	3	239.54	Exosome complex component RRP4 OS=Homo sapiens GN=EXOSC2 PE=1 SV=2 - [EXOS2_HUMAN]	21862.5	20070.8	25238.2	8703.79	8950.54	13248.1	19611.8	19419.6	21719.3	16767.3	12553.7	18640.8	28084.1	21978.3	24893.4	15049.5	11479.6	17731.4	17816.1	13386.9	15666.7	7387.7	11810.9	13687.2	0.00189788	0.999368	0.980469	0.999836	0.148577	0.281641	-0.298284	0.000274687	0.00856612	7.11766e-05
Q6YN16	3	3	155.61	Hydroxysteroid dehydrogenase-like protein 2 OS=Homo sapiens GN=HSDL2 PE=1 SV=1 - [HSDL2_HUMAN]	7996.69	9332.86	13035.4	14913.1	13266.3	5923.9	14782.5	11392	13231.3	11608.1	9869.95	13382	19759.3	17938.6	28903.6	27195.2	12756.6	16485.7	7827.01	4228.98	5990.52	4403.54	10025.7	1387.64	8.44193e-10	1	0.644759	0.388592	0.204107	0.932454	-0.928864	7.33721e-08	0.190603	0.410506
Q9Y4P3	3	3	181.78	Transducin beta-like protein 2 OS=Homo sapiens GN=TBL2 PE=1 SV=1 - [TBL2_HUMAN]	16680.3	17711.5	18253.3	35354.7	27283.3	29785.8	24053.3	21690.4	18934.3	36308.7	21006.6	21988.6	12189.6	20497.3	25162.9	31341.5	20011.6	24477.7	21527.6	33242.6	22402.6	26744	28592.3	23969.5	0.000168195	1	1	0.99999	-0.010851	-0.11795	0.109225	0	4.42365e-08	4.16889e-06
Q8TEM1	3	3	182.16	Nuclear pore membrane glycoprotein 210 OS=Homo sapiens GN=NUP210 PE=1 SV=3 - [PO210_HUMAN]	35809.7	33869.1	56077	59141	48493.9	50529.4	77780.3	25024	24375.6	50206.6	39841	46674	30417.7	36395.4	43462	41605.4	52999.1	56687.6	65236.5	71042.1	24607.5	70228.3	34521.7	58566.4	0.361453	0.999999	1	1	-0.105486	-0.118303	0.191409	4.73067e-07	2.4021e-10	2.60918e-10
Q12800	3	3	177.75	Alpha-globin transcription factor CP2 OS=Homo sapiens GN=TFCP2 PE=1 SV=2 - [TFCP2_HUMAN]	4958.28	2270.61	3128.61	10008.5	6902.44	5888.77	3596.54	5213.52	5516.57	3219.91	5379.6	5815.03	7758.22	7173.92	5185.44	9724.17	8585.64	10143.5	2816.45	4098.66	5000.58	3520.47	5240.75	5975.62	2.47247e-15	1	0.179396	0.999984	-0.206204	0.550767	-0.315052	2.71304e-12	0.746188	6.7392e-06
P57740	3	3	145.13	Nuclear pore complex protein Nup107 OS=Homo sapiens GN=NUP107 PE=1 SV=1 - [NU107_HUMAN]	36505	28304.9	35274.1	39387.8	38982.9	29481.9	42332.7	44069.4	33615.2	44847	36532.2	37322	36481.1	30697	39990.2	40256.4	25168	29960.4	40595	29445.8	26260.6	35490.3	32267.1	18151.6	3.12928e-06	0.999805	1	0.999334	0.199167	-0.0378444	-0.190539	8.45202e-05	0	0.000289275
Q06265	3	3	234.63	Exosome complex component RRP45 OS=Homo sapiens GN=EXOSC9 PE=1 SV=3 - [EXOS9_HUMAN]	89393.4	86943.6	84722.8	97624	90521.5	108885	95724	98640.7	94126.7	114157	84365.6	90209.2	76835.4	73897.5	87916	105890	70105.1	86491.5	104510	111490	105270	93903	95047.4	106567	6.50096e-08	1	0.968477	0.989278	0.0486314	-0.155298	0.144275	5.8608e-10	0.0139106	0.00468175
Q10567	12	3	656.51	AP-1 complex subunit beta-1 OS=Homo sapiens GN=AP1B1 PE=1 SV=2 - [AP1B1_HUMAN]	29756.8	31634.5	28651.2	16176.2	25776.8	13222.7	30231.7	28508.6	22467	17581.9	19552	24193.8	35248.4	38211.9	39182	20067.1	24800.1	22176	25476.9	17146.3	14233.9	11453.3	25514.2	8761.3	0.000273349	1	0.999653	0.931136	-0.0269059	0.307252	-0.501388	0	0.000150875	0.0309868
O15514	3	3	162.48	DNA-directed RNA polymerase II subunit RPB4 OS=Homo sapiens GN=POLR2D PE=1 SV=1 - [RPB4_HUMAN]	18430	26033.4	16018.9	29408.2	32082.2	32638.4	19853.2	21185.7	21363.7	25192.4	25654.3	31866.2	25862.7	20936.8	21619.3	22152.9	21845.5	31131	33696.9	37624.6	30891.2	29511.9	29086.7	37960.8	1.03251e-07	1	1	0.4763	-0.091444	-0.107111	0.36247	1.03983e-11	1.94177e-10	0.322119
Q8NE71	4	3	246.92	ATP-binding cassette sub-family F member 1 OS=Homo sapiens GN=ABCF1 PE=1 SV=2 - [ABCF1_HUMAN]	18604	20835.1	18607.9	18483.2	11971.6	21436.3	22319.5	26666.1	17041	9402.05	8201.78	18767.1	18149	27701.8	15967.5	15667.3	9926.72	26012.9	18947.5	31305.4	17859.3	9022.81	14781.4	26762.4	0.00134496	0.999999	1	1	-0.102511	0.0450502	0.110372	3.7123e-07	0	0
Q96ST3	3	3	166.16	Paired amphipathic helix protein Sin3a OS=Homo sapiens GN=SIN3A PE=1 SV=2 - [SIN3A_HUMAN]	33482.4	32674.3	27205.6	31755.7	24264.4	38836.6	42593.3	45180.4	31393.2	46881	35149.6	36540.1	22185.2	22520.8	20572.8	26356.7	15611.2	28932.4	35339.1	35193.8	48095.9	26260.5	41309.1	43433.5	1.02504e-09	0.908983	0.421261	0.984521	0.336958	-0.466909	0.28691	0.0414444	0.375449	0.00677505
O00151	3	3	134.73	PDZ and LIM domain protein 1 OS=Homo sapiens GN=PDLIM1 PE=1 SV=4 - [PDLI1_HUMAN]	51163.2	67117.3	53600.9	47389.7	57850.9	75935.1	60405.4	72824.9	48038.8	43850.6	42205.5	70979.8	55904.5	67041.9	54634.1	43953.5	48764.5	80600.9	66918.9	60580.8	73097	41959.8	65764.8	93699.2	0.0199755	1	1	0.999976	-0.0615769	-0.00884345	0.187368	7.58678e-11	0	1.06393e-05
P51784	3	3	136.16	Ubiquitin carboxyl-terminal hydrolase 11 OS=Homo sapiens GN=USP11 PE=1 SV=3 - [UBP11_HUMAN]	18958.2	21405	16635.6	11745.9	18402.8	20367.8	27178.9	20017.9	13032.3	11866.1	15364.1	19249.4	23204.5	14962.4	19780.5	12393	13454.8	26439.6	15299.7	16576.5	21278.7	13394.4	17038.8	18826.8	0.37662	1	1	1	-0.0108655	0.0360387	-0.0701157	0	0	0
Q9H7Z7	5	3	310.35	Prostaglandin E synthase 2 OS=Homo sapiens GN=PTGES2 PE=1 SV=1 - [PGES2_HUMAN]	51507.2	35287.5	39786.5	60920.5	51043.8	43210.2	41528.6	39930.2	37819.2	43499.3	43464.9	55351.4	55094.5	58403.7	63123	67878.5	39420.9	55649.1	38000.6	25005.2	26822.3	29090	36231.8	29583.7	2.76944e-06	1	0.994147	0.176554	-0.107117	0.269263	-0.608998	6.64998e-10	0.00254926	0.753122
P28072	3	3	122.09	Proteasome subunit beta type-6 OS=Homo sapiens GN=PSMB6 PE=1 SV=4 - [PSB6_HUMAN]	140259	124815	210115	88839.2	112548	90242.2	130492	119431	179310	133082	128555	75000.4	170246	126498	164393	124840	132115	72292.8	118655	115131	128542	122823	103663	79624.6	0.000959069	1	1	0.999999	-0.0017858	0.0436687	-0.198089	0	0	2.48247e-07
Q8WVV9	3	3	116.08	Heterogeneous nuclear ribonucleoprotein L-like OS=Homo sapiens GN=HNRNPLL PE=1 SV=1 - [HNRLL_HUMAN]	5235.17	5489.27	6714.33	10724.8	5072.51	5783.89	6326.02	4222.21	7719.07	5203.13	7121.3	6393.77	6713.95	7939.16	5447.76	8262.69	7728.92	6495.66	4272.56	4455.92	5672.35	8548.22	5031.62	5200.83	0.00645287	1	0.999853	0.994401	-0.0772531	0.126238	-0.233834	1.13265e-12	6.39767e-05	0.0024383
Q9Y3B4	3	3	167.58	Pre-mRNA branch site protein p14 OS=Homo sapiens GN=SF3B14 PE=1 SV=1 - [PM14_HUMAN]	37687	36748.1	26244.6	46990.2	38488.8	39876.5	34442	43238.3	41442.9	50411.2	45661.9	38172.2	26699.1	32440.7	25330.2	46120.4	39541.3	27330.5	39513.3	45938.1	50789.8	39664.4	38466.1	41983.8	1.01291e-05	0.99995	0.999419	0.999776	0.16469	-0.19497	0.181598	2.17442e-05	0.000252315	9.7405e-05
Q9H3P2	3	3	86.37	Negative elongation factor A OS=Homo sapiens GN=NELFA PE=1 SV=3 - [NELFA_HUMAN]	14834.2	36673.1	47312	40527.7	44818.1	86159.5	42619.9	54359.7	37622	40431.1	34523.9	58751.9	49432.2	51982.8	34105.5	29572.8	30715.9	66006.1	52211.9	69389.4	65446.4	42528.8	51440.1	68409.7	0.000171577	1	1	0.742433	-0.0108004	-0.0461439	0.370295	1.16764e-08	0	0.129343
O15270	3	3	183.76	Serine palmitoyltransferase 2 OS=Homo sapiens GN=SPTLC2 PE=1 SV=1 - [SPTC2_HUMAN]	15061.7	13844.2	13636.6	15139	13307.3	16303.8	20088	17452.5	13560.4	18832.8	11273.2	15996.7	6215.93	9843.44	13285.7	14100.7	11939.9	19245.1	23526.2	22342	24154.5	23910.2	25588.1	19297.1	5.8337e-09	0.999999	0.957412	0.0292752	0.15515	-0.226086	0.669265	5.14706e-07	0.018901	1.5335
Q9BYD2	3	3	114.06	39S ribosomal protein L9, mitochondrial OS=Homo sapiens GN=MRPL9 PE=1 SV=2 - [RM09_HUMAN]	11654.4	16308.1	19903.6	21367.8	16277.2	22957	20253.9	13465.2	20067.7	10724.4	12351.6	19478.1	16848.3	21293.8	20559	26841.3	17473.9	21189.1	12905.2	14147.1	17793.3	12556.9	13209.7	16027.2	0.098291	0.999974	0.999787	0.987399	-0.17105	0.195457	-0.324177	1.13172e-05	9.24402e-05	0.00550723
O95155	4	4	153.88	Ubiquitin conjugation factor E4 B OS=Homo sapiens GN=UBE4B PE=1 SV=1 - [UBE4B_HUMAN]	5627.85	7847.1	5217.95	3030.81	8235.91	14648.3	9757.64	12895.1	9190.57	5073.66	10091	17251.4	2878.06	3693.53	5073.49	3809.47	3751.45	11871.8	13940	6187.19	11631.5	5027.86	12962.7	14117	0.000779816	0.963224	0.988068	0.9749	0.526607	-0.521417	0.517754	0.0162725	0.00521318	0.0110401
Q9BYD6	4	4	249.23	39S ribosomal protein L1, mitochondrial OS=Homo sapiens GN=MRPL1 PE=1 SV=2 - [RM01_HUMAN]	32741	39340.1	26433.4	60938	51798.7	38760.9	46088.2	25069.1	21886.8	48375.8	49042.3	58151.3	36307.3	37490.2	33465.1	35958	53910.6	53104.7	36144.4	20875.9	17187.4	52962.3	33977.2	32489.9	1.2034e-05	1	1	0.96679	-0.0080938	0.00129046	-0.368643	0	0	0.0146678
Q13618	5	4	322.37	Cullin-3 OS=Homo sapiens GN=CUL3 PE=1 SV=2 - [CUL3_HUMAN]	26238	27991.3	30653.2	34910.4	33747.8	26397.7	32571.5	31214.2	31751.8	35597.6	37788.5	39109.2	23570.8	24757.9	26819.1	23709.8	31856	25740.8	34198.1	28040.5	29132.8	38226.3	43323.3	34175.4	0.000523096	0.998806	0.999443	0.999584	0.209307	-0.201761	0.202799	0.000518752	0.000241877	0.000180872
O43172	8	4	297.3	U4/U6 small nuclear ribonucleoprotein Prp4 OS=Homo sapiens GN=PRPF4 PE=1 SV=2 - [PRP4_HUMAN]	55974.3	56591.1	45857.2	85957.7	65879.4	70880.8	69640.2	75708.5	58092.4	97798.9	77334.9	63126.8	48949.8	50640.4	47614.3	77724.3	56266.2	52408.4	61832.1	70758.1	79794.9	72860.8	73488	77900.2	2.75727e-10	0.979952	0.997061	0.980832	0.21275	-0.192189	0.196102	0.00879507	0.00127842	0.00840556
Q9UI26	4	4	135.45	Importin-11 OS=Homo sapiens GN=IPO11 PE=1 SV=1 - [IPO11_HUMAN]	9856.82	7857.08	12057.5	4528.79	8027.54	5593.47	9230.71	9061.62	10122.8	4824.68	6549.31	5730.95	8278.34	11022.7	10876.1	4625.32	5760.31	4805.43	5281.33	4070.98	5171.63	3917.11	5555.52	2546.42	5.28989e-07	1	1	0.968673	-0.0741589	-0.0789834	-0.852332	0	0	0.0138229
Q96B26	5	4	242.56	Exosome complex component RRP43 OS=Homo sapiens GN=EXOSC8 PE=1 SV=1 - [EXOS8_HUMAN]	34711.7	30115	36135.1	30598	39913.7	24563.5	41635	30167.1	33986	30275.6	29322.5	33787.3	34263.4	28234	34427.8	32526.2	22983	22770	26256.4	16933.9	23171	17200	25316.9	17301	2.95127e-05	1	0.999997	0.183129	0.0229008	-0.162087	-0.635652	0	1.45974e-06	0.737242
P57088	5	4	262.33	Transmembrane protein 33 OS=Homo sapiens GN=TMEM33 PE=1 SV=2 - [TMM33_HUMAN]	48584.2	62985.6	38419.1	67143.4	48509.1	51414.4	49662.1	77311.4	36604.1	77397.3	45100.6	49497.5	50190.5	65756.3	47847.3	73386.2	40734.8	53939	78402.2	95815.8	68655.2	68201.6	71540.7	67685	1.98141e-14	1	1	0.105101	0.0818907	0.0658132	0.506152	7.1095e-13	2.28026e-11	0.978393
P61019	5	4	252.82	Ras-related protein Rab-2A OS=Homo sapiens GN=RAB2A PE=1 SV=1 - [RAB2A_HUMAN]	25405.7	33741.1	28809.8	82286	85319.5	77957.7	37632.4	59560.2	34503.3	103572	76307.2	78607.7	31593.1	67790.2	22438.7	46495.2	74332.6	71371.4	48069.5	49054	47347.3	107227	100601	100419	2.48598e-10	0.999239	1	0.838616	0.226378	-0.0869102	0.44084	0.000330563	0	0.0764367
Q3ZCQ8	5	4	304.21	Mitochondrial import inner membrane translocase subunit TIM50 OS=Homo sapiens GN=TIMM50 PE=1 SV=2 - [TIM50_HUMAN]	79460.7	94656.3	63444.2	85973.9	70282.3	74022.3	97558.5	115631	79055.5	89441.4	70882.1	102777	65131.4	68644.8	74894.4	79621.9	58864	71620.1	93521.1	94777.2	96555.8	69842.6	97226.3	100832	6.48423e-08	0.747737	0.994109	0.735739	0.247371	-0.159833	0.240625	0.126251	0.00256581	0.133276
Q01650	4	4	329.58	Large neutral amino acids transporter small subunit 1 OS=Homo sapiens GN=SLC7A5 PE=1 SV=2 - [LAT1_HUMAN]	142266	122026	47823.7	187870	129753	101747	188902	212296	121765	254831	145940	167556	76713.8	123021	48204.4	172425	102754	79242.2	205652	342505	153296	222945	202088	157338	6.56938e-12	0.322153	0.99885	0.0286233	0.577132	-0.280204	0.811545	0.491938	0.000499581	1.54328
Q969Z0	4	4	156.44	Protein TBRG4 OS=Homo sapiens GN=TBRG4 PE=1 SV=1 - [TBRG4_HUMAN]	23390.3	32870.4	27271.8	41974.1	35985.6	17131.9	30506.7	28235.3	26390.8	37011	28445.9	23855.6	26408.2	25135.1	32835.8	33761.9	22821.8	20307.1	23656.9	23160.2	22875	21309.1	23693.9	14417	4.63849e-13	1	1	0.853525	-0.0341515	-0.14745	-0.468302	0	2.25653e-09	0.0687836
P08754	9	4	506.82	Guanine nucleotide-binding protein G(k) subunit alpha OS=Homo sapiens GN=GNAI3 PE=1 SV=3 - [GNAI3_HUMAN]	33184.4	29608	13713.5	49106	28971.9	27337.4	51430	47041.9	43714.8	75544	56342.7	52830.7	23214.2	24199.9	9975.98	32622.7	27043	16813.7	56091.7	66783.6	46108.7	60962.8	68951.2	63195.8	4.67758e-15	0.00608118	0.834654	0.000401116	0.845554	-0.442485	0.99305	2.21601	0.0784935	3.39673
P69905	4	4	184.82	Hemoglobin subunit alpha OS=Homo sapiens GN=HBA1 PE=1 SV=2 - [HBA_HUMAN]	38092.4	38408.1	32388.2	98031	73954.4	46108.3	73469.2	119759	50191.2	174449	145044	118359	39614.9	44140.6	34861.2	90035.6	83787.3	41849.9	255938	513655	129128	390916	269479	202973	1.98728e-11	0.155894	1	3.12896e-08	1.05902	0.0318849	2.43	0.807171	0	7.5046
P55145	4	4	188.01	Mesencephalic astrocyte-derived neurotrophic factor OS=Homo sapiens GN=MANF PE=1 SV=3 - [MANF_HUMAN]	101068	76287.1	67312.8	83382.9	64824.8	101465	92507	85187.9	63399.4	87187	60406.8	84000.5	116067	98611.6	82135.8	102423	68835.6	108694	97431	119795	94756.4	79962.1	97469.1	112027	0.000329963	1	0.962878	0.729514	-0.0646143	0.222483	0.282919	2.81151e-10	0.0164289	0.136967
Q02809	4	4	170.52	Procollagen-lysine,2-oxoglutarate 5-dioxygenase 1 OS=Homo sapiens GN=PLOD1 PE=1 SV=2 - [PLOD1_HUMAN]	11673.3	10572.3	16430.9	19383.1	14522.2	11451.1	8523.38	6391.52	8303.92	8115.75	7885.49	7341.21	14468.9	13901	19237.1	19802.9	14366.4	12355.4	6062.5	3676.09	7675.92	7304.28	7532.09	4660.86	2.08919e-16	0.0014177	0.999921	1.64825e-07	-0.851823	0.163728	-1.18687	2.84842	3.45139e-05	6.78298
Q96P70	4	4	192.66	Importin-9 OS=Homo sapiens GN=IPO9 PE=1 SV=3 - [IPO9_HUMAN]	16785.1	22322.6	19552.4	13060	22020.4	12532.1	19804.7	15823	11773.9	8742.08	10265.2	12581.7	14821.5	19411.3	16515.4	11015	9889.18	15308.3	12240.8	7377.83	6886.87	7089.94	11587.1	3166.87	4.83256e-07	0.998044	0.999994	0.0597356	-0.428019	-0.289336	-1.1362	0.000850334	2.78762e-06	1.22377
O95347	5	4	215.73	Structural maintenance of chromosomes protein 2 OS=Homo sapiens GN=SMC2 PE=1 SV=2 - [SMC2_HUMAN]	95865.5	104626	71964.8	124743	91036.7	98344.6	149463	149082	192205	206318	167888	268973	121094	111478	66475.8	93379.3	93542.6	123742	324926	414598	268396	221845	182754	352843	3.52098e-12	0.0175412	1	5.89539e-07	0.95093	0.0557978	1.58956	1.75594	0	6.22949
Q9UKD2	4	4	240.75	mRNA turnover protein 4 homolog OS=Homo sapiens GN=MRTO4 PE=1 SV=2 - [MRT4_HUMAN]	31126.9	42477.3	22315.4	20827.3	20233.9	39286.4	28810.7	32349.3	55808.7	14778.2	26413	61011.5	35100.1	47169.5	23822.4	21166.9	34088.5	43211.9	49331.9	85919.4	45153.5	48398.2	23842.5	56228.3	0.231867	1	1	0.652955	0.314295	0.214755	0.809254	1.11336e-07	9.87022e-08	0.185117
P18583	5	4	288.34	Protein SON OS=Homo sapiens GN=SON PE=1 SV=4 - [SON_HUMAN]	31555.3	29462.2	25007.9	20899	23473.3	42662	29592.8	31758.9	43678	32583.3	27879.2	52134.1	38052.1	33258.8	23303.2	29410.3	23503	38971.9	42720.5	64183	43097.2	29873	28305.6	65156.6	1.38884e-08	0.987057	1	0.306424	0.330582	0.1079	0.659404	0.00565786	3.25601e-09	0.513677
P55039	4	4	203.69	Developmentally-regulated GTP-binding protein 2 OS=Homo sapiens GN=DRG2 PE=1 SV=1 - [DRG2_HUMAN]	10784.5	11963.6	10284.3	8534.11	13903	10248.1	8268.1	10322	4895.22	4859.76	6644.22	6156.2	11204.5	13731.8	10368	7795.94	9625.98	12049.3	6176.75	4245.02	4275.22	5163.59	7572.38	4551.01	1.32204e-24	0.0085865	1	3.07836e-06	-0.675545	-0.0208309	-1.03893	2.06618	0	5.51168
Q9Y3B9	4	4	139.86	RRP15-like protein OS=Homo sapiens GN=RRP15 PE=1 SV=2 - [RRP15_HUMAN]	32401.3	44403.4	21693.8	41547.9	29606.8	38286.2	36050.6	35361.3	42687.5	54378.6	52138.8	62640	31327.2	31666.6	27475.5	46168.2	40268.7	38647.9	57000.5	66843	46998.5	63582	45319.4	66855.9	1.2948e-05	0.549368	1	0.0083975	0.445947	0.0518874	0.737105	0.260136	1.08669e-11	2.07585
O43395	4	4	230.91	U4/U6 small nuclear ribonucleoprotein Prp3 OS=Homo sapiens GN=PRPF3 PE=1 SV=2 - [PRPF3_HUMAN]	28080.3	33779.1	23559.4	32264.7	20136.6	39273.7	38635.5	45373.7	30421.4	47511.3	30855.3	43995.4	30445.8	30582.6	22821.5	28660.7	23915.1	37621.9	45797.6	43826.5	44285.1	38015.2	39744.6	52105.5	1.62464e-10	0.209135	1	0.00669314	0.41911	-0.0250316	0.574792	0.679572	0	2.17437
Q15843	4	4	221.57	NEDD8 OS=Homo sapiens GN=NEDD8 PE=1 SV=1 - [NEDD8_HUMAN]	72020.6	70579.2	69160.8	58739	63544	57211.9	48520	53599.1	54011.8	46532.8	46049.8	40693.2	75148.7	50279.6	76981.1	69289	59615.2	59611.4	39684.8	40116.3	43564.9	38098.1	53710.2	38240.5	1.38988e-13	0.0995687	1	0.000711311	-0.435013	-0.00121896	-0.62661	1.00188	0	3.14794
Q01105	9	4	501.78	Protein SET OS=Homo sapiens GN=SET PE=1 SV=3 - [SET_HUMAN]	231109	74403.2	291799	29923.4	100327	53634.9	69386.1	60398.6	162874	55575.3	74818.4	24774.7	150382	61985	160311	58251.5	60385	28701.8	36059.9	61351.8	41294	23485.7	22269.6	15967.8	1.97038e-08	0.999473	0.999997	0.116019	-0.802746	-0.587129	-1.9626	0.000229001	1.26467e-06	0.935472
O00629	5	4	246.9	Importin subunit alpha-3 OS=Homo sapiens GN=KPNA4 PE=1 SV=1 - [IMA3_HUMAN]	45970	53127.1	39228	41625.6	46458.4	67421.6	62993.1	54721	43480.6	63398.2	41901	54255.4	47339.6	49574.2	50113	49271	42535	52407.4	54704.1	55008.4	59062.1	40816.7	57196.2	60359.3	0.0966905	0.999996	1	0.999895	0.126461	-0.0127762	0.154953	1.52722e-06	0	4.53914e-05
Q6XQN6	4	4	132.99	Nicotinate phosphoribosyltransferase OS=Homo sapiens GN=NAPRT1 PE=1 SV=2 - [PNCB_HUMAN]	20050.9	24630.3	24892.1	16508.3	27230.8	20827.3	12175.7	16783	14918.3	14575.7	13591.1	10437	18524.3	22446	24733.1	18713.4	20363.4	20634.4	9775.83	12606.6	9004.13	11543.6	12811.2	7919.37	4.63406e-15	0.0157727	1	3.40034e-06	-0.701607	-0.0970327	-1.07526	1.80209	5.78194e-10	5.46848
Q16763	4	4	227.2	Ubiquitin-conjugating enzyme E2 S OS=Homo sapiens GN=UBE2S PE=1 SV=2 - [UBE2S_HUMAN]	31353.7	33886.5	23676.7	32079.8	32169.3	32824.5	51913	59884.1	45891.4	49792.9	48277.9	50147.5	28754.4	40494.1	25257.7	34720	36629.4	33013.4	57896	79432	66595	65068.1	57791.4	64882.6	1.63674e-25	5.54126e-05	1	7.35642e-10	0.717865	0.0965901	1.07439	4.25639	1.1926e-07	9.13333
P24941	7	4	411.6	Cyclin-dependent kinase 2 OS=Homo sapiens GN=CDK2 PE=1 SV=2 - [CDK2_HUMAN]	21744.8	28799.4	25478.7	21126.2	18521.6	25946.7	44141.4	43908.3	38945.2	35564.5	33887.7	42743.8	24817.7	16525.8	25022.9	17606	18989.2	22193.6	32965.9	37357.5	42007.2	33129.5	49838.7	44432.8	4.24845e-23	3.7894e-05	0.997122	4.52692e-05	0.756163	-0.178283	0.75942	4.42143	0.00125167	4.3442
Q8WVM8	4	4	295.59	Sec1 family domain-containing protein 1 OS=Homo sapiens GN=SCFD1 PE=1 SV=4 - [SCFD1_HUMAN]	90059.3	86860.3	81469.3	78179.5	87572.5	89472.3	82079	67869.7	69191.6	50428.3	56798.6	68981.8	84952.9	79044.2	83095.5	76377.5	61294.2	86995.6	60454.5	55304.3	55739.9	45958.8	57742.2	56554.7	1.6593e-12	0.0546698	0.999277	1.79319e-05	-0.377556	-0.12263	-0.630567	1.26225	0.000314086	4.74637
O75947	4	4	189.95	ATP synthase subunit d, mitochondrial OS=Homo sapiens GN=ATP5H PE=1 SV=3 - [ATP5H_HUMAN]	263257	231153	189558	273206	220329	209922	308508	273825	224949	293838	247622	261075	251305	259271	230420	351334	232710	241845	339935	437489	252836	322971	296442	292473	1.53695e-12	0.797724	0.968745	0.001625	0.214486	0.17549	0.485241	0.0981473	0.0137907	2.78915
P20674	5	4	221.14	Cytochrome c oxidase subunit 5A, mitochondrial OS=Homo sapiens GN=COX5A PE=1 SV=2 - [COX5A_HUMAN]	76407.3	60511.7	42678.5	51072.2	44696.3	31987.5	47013.3	44272.1	67108.5	77189	68653.1	61146.9	66218	60750.1	42603.5	71564.8	75408.1	46148	73352.2	101790	62031.5	110788	55819.7	63144.8	0.84191	0.999998	0.999999	0.96505	0.24951	0.238848	0.603296	7.26408e-07	3.28855e-07	0.0154502
Q7Z3B4	4	4	256.67	Nucleoporin p54 OS=Homo sapiens GN=NUP54 PE=1 SV=2 - [NUP54_HUMAN]	31001.9	40914.7	36710.4	37109.1	30371.9	40925.6	47696.6	44928.3	45526.9	51439.9	41711.8	45214.3	30693.9	33112.2	41491.7	43076.6	30370.6	40581.5	42841.5	60171.2	45828.3	45412.1	50188.2	51516.8	2.82159e-05	0.320455	1	0.0571839	0.349453	0.0151615	0.447474	0.494233	0	1.24273
Q9Y5S9	4	4	138.72	RNA-binding protein 8A OS=Homo sapiens GN=RBM8A PE=1 SV=1 - [RBM8A_HUMAN]	16374.9	17904	14750.1	33568.7	35265.5	24978.7	27124.8	20337	29484.7	38112.9	53891.9	37073.4	23196.2	19532.9	14461.6	24383	38373.2	25543.7	27645.1	29041.1	31579.6	53138.6	43916.2	41201.2	0.0003751	0.684811	1	0.233011	0.528398	0.0265066	0.66523	0.164429	0	0.632624
O60488	6	4	315.16	Long-chain-fatty-acid--CoA ligase 4 OS=Homo sapiens GN=ACSL4 PE=1 SV=2 - [ACSL4_HUMAN]	23045.7	32834.6	31379.6	32659.9	38616.8	45171.3	21772.1	19027.7	21131.2	16661.6	14932.5	28054.2	28054.1	36444.6	32082.5	44715.6	27658.2	48867.8	23002.3	14827.1	23863.5	17182	16912.7	23791.2	2.80487e-12	0.0234999	1	0.0169982	-0.744605	0.0966531	-0.768539	1.62893	4.39855e-10	1.7696
P11279	4	4	247.34	Lysosome-associated membrane glycoprotein 1 OS=Homo sapiens GN=LAMP1 PE=1 SV=3 - [LAMP1_HUMAN]	57734.5	50350.9	40239.7	84831.1	65045.5	43239.9	92242.9	87538.4	63456.3	119074	87242.9	70743.7	73148	66104.7	50269.4	109609	70750.2	48756.3	119147	130343	97301.8	131324	125248	87056.4	1.0219e-06	0.0298382	0.9564	1.60256e-06	0.6077	0.294063	1.01584	1.52523	0.0193606	5.79519
Q13085	5	4	228.93	Acetyl-CoA carboxylase 1 OS=Homo sapiens GN=ACACA PE=1 SV=2 - [ACACA_HUMAN]	30857.8	31435.2	33239.4	35646.4	50694.1	57137.3	19374.1	14604.8	21080.5	21088.6	26568.7	25501	32206.8	20523.5	35551.1	23022.4	42679.8	42653.9	13479.2	4920.18	17396.9	20331.2	23619.6	16743.1	5.12169e-16	0.0099203	0.995829	4.18094e-07	-0.898476	-0.281534	-1.30862	2.00348	0.0018151	6.37873
O43660	6	4	173.68	Pleiotropic regulator 1 OS=Homo sapiens GN=PLRG1 PE=1 SV=1 - [PLRG1_HUMAN]	5208.14	6800.89	4764.86	10034.4	7270.3	6399.8	8695.3	9665.81	12519.7	20446.6	15411	10860	7605.57	5821.66	5651.51	7148.92	7987.38	6156.6	12787.7	13843	16530.6	11195.5	11088.9	14785.3	2.57143e-14	0.0163802	1	0.00401992	0.938875	-0.00380914	0.987008	1.78568	0	2.39578
Q92769	7	4	380.77	Histone deacetylase 2 OS=Homo sapiens GN=HDAC2 PE=1 SV=2 - [HDAC2_HUMAN]	92638.6	98030	60999.6	44362.9	44893.6	79300.9	113823	136949	104530	94774.8	64606.4	91576.1	75560	81323.9	64695	50185.8	38886.8	61925.1	109039	116525	94594.2	67277	57653.1	98025.3	0.0112014	0.394161	1	0.902555	0.528772	-0.173627	0.370089	0.404327	1.65573e-07	0.0445263
P52732	4	4	290.54	Kinesin-like protein KIF11 OS=Homo sapiens GN=KIF11 PE=1 SV=2 - [KIF11_HUMAN]	7109.8	12897.6	11739.2	4632.98	11503.3	13154.3	22016.1	20901.7	14583.1	12174.8	17061.7	20834.9	7007.68	8215.82	10049.8	8207.67	7971.59	9836.85	14989.4	11492.7	18926.2	14493.9	15369.4	16247.1	1.86416e-11	0.00333206	0.999991	0.101415	0.817544	-0.251032	0.584373	2.47729	4.09004e-06	0.993899
Q5SRE5	4	4	253.3	Nucleoporin NUP188 homolog OS=Homo sapiens GN=NUP188 PE=1 SV=1 - [NU188_HUMAN]	12719.1	21559.3	17932.3	18666.4	15829.4	20927.4	24437.8	30748.2	19219.7	26460.3	20964	19923.9	7578.4	22819.7	19472.2	17715.2	13991.9	21893.8	17344.4	28096.8	17252.6	30105.8	19978.6	24495	0.000357241	0.768789	1	0.926585	0.397258	-0.0569014	0.35092	0.114193	9.39788e-08	0.0331146
P08397	4	4	210.63	Porphobilinogen deaminase OS=Homo sapiens GN=HMBS PE=1 SV=2 - [HEM3_HUMAN]	22797.7	26800.9	23666	12722	18230.3	23591.8	18600.9	17873.2	14151.5	11038.3	12357.5	14890.4	16736.9	15696.5	26435	7060.69	10115.6	18617	11560.9	9912.51	11911.9	6776.6	13984.3	10464.8	5.87534e-08	0.622844	0.594836	0.00186689	-0.523541	-0.433134	-0.984134	0.205621	0.225603	2.72888
P46977	5	4	172.59	Dolichyl-diphosphooligosaccharide--protein glycosyltransferase subunit STT3A OS=Homo sapiens GN=STT3A PE=1 SV=2 - [STT3A_HUMAN]	37886.9	30452.6	23695.3	46233	30166.6	37082.7	61498.7	68765.2	47656.2	90147.9	46175.2	62292.5	40734.1	63220.7	32114.2	63160.2	49090.2	48001.7	87735.5	148039	62451	85414.5	83570.7	69485.4	0.000671732	0.138014	0.894769	0.00034591	0.873528	0.527902	1.38485	0.860075	0.0482893	3.46104
Q9UK76	5	4	315.78	Hematological and neurological expressed 1 protein OS=Homo sapiens GN=HN1 PE=1 SV=3 - [HN1_HUMAN]	70616.7	45285.5	57654.6	58208.1	99131.2	67105.3	19600.1	16208	15254.9	4876.8	18754.8	15672.3	48012.7	19494.7	55726.9	28462.6	57468.9	67290.3	10346.8	5017.82	14705.5	8286.82	20774.7	8937.8	8.69328e-17	5.91886e-05	0.989326	6.20219e-07	-2.13891	-0.525723	-2.54769	4.22776	0.00466063	6.20745
Q8NBJ7	4	4	135.55	Sulfatase-modifying factor 2 OS=Homo sapiens GN=SUMF2 PE=1 SV=2 - [SUMF2_HUMAN]	20071.4	13668.6	19830.5	28631.8	30472.1	26746.3	12483.4	9219.1	11256.1	15477.1	11045.9	12478.3	12467.9	10066.3	18605.4	21906.4	14019.3	14969.8	7122.76	5391.24	9096.43	9799.3	9426.58	9186.77	2.23181e-05	0.0960601	0.770485	0.000109713	-0.954182	-0.599189	-1.47878	1.01746	0.113236	3.95974
O75937	4	4	192.3	DnaJ homolog subfamily C member 8 OS=Homo sapiens GN=DNAJC8 PE=1 SV=2 - [DNJC8_HUMAN]	101520	92722.1	75327.9	77331.6	70677.5	71377.3	138534	129162	110109	92326.3	87591.8	104972	95149.6	89056.2	87642.8	88196.4	61161.3	80362.2	133734	119928	115536	87076.9	125100	83262	6.77352e-08	0.0419967	1	0.0408007	0.438641	0.03674	0.442858	1.37678	0	1.38933
Q9NUQ8	4	4	234.15	ATP-binding cassette sub-family F member 3 OS=Homo sapiens GN=ABCF3 PE=1 SV=2 - [ABCF3_HUMAN]	18254.3	26356.2	21860.2	19064.3	26734.7	34679.7	19347.2	18992.2	13386	13643.8	13952.6	14585.4	19978.3	17038.3	22082.8	14917	19114	27102.2	10182.8	11295	12980.1	13820.2	15295.6	16837.3	1.03464e-16	0.0148792	0.943912	6.7146e-05	-0.646009	-0.28949	-0.869855	1.82742	0.0250684	4.17298
Q9NUQ6	4	4	147.95	SPATS2-like protein OS=Homo sapiens GN=SPATS2L PE=1 SV=2 - [SPS2L_HUMAN]	26336.3	20775.2	23342.4	21917.9	24769.8	27168.3	9045.46	10829.9	7382.44	13737.6	9234.26	8904.93	19825.2	22823.4	15483.6	19928.7	14452.9	18182.7	5968.02	5332.82	7070.88	10131.8	11486.9	9995.21	2.84315e-26	7.85869e-08	0.812072	5.18608e-10	-1.2871	-0.38256	-1.52959	7.10465	0.0904057	9.28516
Q9UQB8	4	4	246.5	Brain-specific angiogenesis inhibitor 1-associated protein 2 OS=Homo sapiens GN=BAIAP2 PE=1 SV=1 - [BAIP2_HUMAN]	20280.4	23054.7	17115.2	22986	20445.2	29672.4	21843	20978.9	13827.1	28392.1	18538.9	31828	26896.3	26791.9	21508.9	19814.9	26676.4	30812.3	25107.5	24238.9	17432.9	20139	25408.5	40293.9	1.32958e-17	1	0.99977	0.999984	0.0198905	0.191395	0.192529	0	9.9909e-05	7.03517e-06
P28288	4	4	265.23	ATP-binding cassette sub-family D member 3 OS=Homo sapiens GN=ABCD3 PE=1 SV=1 - [ABCD3_HUMAN]	31585	31136.3	33056.1	61330.7	53752.1	42133.6	62638.4	56638.2	35250.8	51468.6	38811.1	37723.7	32080.1	36854.9	48813.3	71620.5	38331.7	40008.4	46056.2	61492.6	41373.9	46706.8	54674.8	43295.2	0.102978	0.999933	1	0.994073	0.159307	0.0815639	0.214748	2.92178e-05	2.14137e-10	0.00258175
Q99613	21	4	1231.87	Eukaryotic translation initiation factor 3 subunit C OS=Homo sapiens GN=EIF3C PE=1 SV=1 - [EIF3C_HUMAN]	37985	15099.7	45591.2	46186.4	56069.7	47568.2	42776.2	30774.2	31623.6	47086.3	52289	31020.3	20976.4	26513.2	43983.1	34982.7	56080.9	33871.8	35485.4	18038.5	37362	41480.4	49040.6	28191.1	2.35722e-05	1	0.999998	0.999942	-0.0770929	-0.199493	-0.245622	0	1.04799e-06	2.53846e-05
O43795	4	4	204.28	Unconventional myosin-Ib OS=Homo sapiens GN=MYO1B PE=1 SV=3 - [MYO1B_HUMAN]	13054.5	17375.3	16716.5	30561.4	22100.4	22262.2	14557.1	16723.3	10096.4	17176.9	21447.7	14651.7	18178	19622.8	12206	30819.9	15189.2	22368.1	15063	12192.9	16950.5	19583.7	14051.9	17350.6	4.66017e-07	0.946181	1	0.973948	-0.366992	-0.0442372	-0.35879	0.0240256	0	0.0114642
P68402	4	4	263.14	Platelet-activating factor acetylhydrolase IB subunit beta OS=Homo sapiens GN=PAFAH1B2 PE=1 SV=1 - [PA1B2_HUMAN]	83354.2	92724.7	91138.1	86159.1	86374.9	64387.9	61464.7	71257.9	58020.5	53600.9	70095.2	59149.4	76039.7	79542.4	80273.3	65857.5	74557.2	77835	57583.3	59110.1	60229.2	60407.3	66592.9	51579.2	6.1074e-13	0.0500748	0.99908	0.00836165	-0.432371	-0.150795	-0.503964	1.30038	0.00039954	2.07771
O95232	5	4	325.55	Luc7-like protein 3 OS=Homo sapiens GN=LUC7L3 PE=1 SV=2 - [LC7L3_HUMAN]	41172.9	28974.3	13564.7	39176.2	30970.5	20763.4	44887.6	40560.5	31700.2	54227.9	40993.2	32666.5	37158.2	28408.9	24352.2	49552.6	26311	21665.7	39316.4	30620.5	42792.6	45252.4	48979.5	40868.8	0.000155651	0.538576	1	0.455786	0.488757	0.10226	0.505116	0.268753	3.02749e-08	0.341239
P49642	4	4	158.24	DNA primase small subunit OS=Homo sapiens GN=PRIM1 PE=1 SV=1 - [PRI1_HUMAN]	33826.1	30833.2	31173.9	19267.3	24864.5	34538.2	19888.2	30101.4	23869	18686.3	18562	23627.7	24889.8	19417.7	20622.5	12140	9554.23	19287.7	15655.1	8681.43	16003.6	10962.4	18223.1	21807.9	1.92856e-14	0.762428	0.00214167	1.61072e-05	-0.373132	-0.720389	-0.934037	0.117801	2.66925	4.79298
P21399	4	4	256.63	Cytoplasmic aconitate hydratase OS=Homo sapiens GN=ACO1 PE=1 SV=3 - [ACOC_HUMAN]	31550.9	36185.7	32128	23980.5	27738.6	44741.6	23220.4	25364.9	19356.7	13860.8	17126.6	22759.6	30496.3	29075	37964.9	21795.6	27690.9	43439.6	22131.7	23233.7	20597.9	16303.3	21209.2	24300.6	3.15216e-15	0.011353	1	0.0565486	-0.690047	-0.0437409	-0.619625	1.94489	0	1.24758
P00966	4	4	180.03	Argininosuccinate synthase OS=Homo sapiens GN=ASS1 PE=1 SV=2 - [ASSY_HUMAN]	22446.8	17321.4	13222.5	17097.5	23301.5	19346.9	9237.17	6871.37	10757	6272.56	8089.23	10592.1	16939.3	13177.6	13027.9	14295	17959.2	20961.5	6570.17	8742.95	8576.95	6944.52	13146.8	9154.74	2.56182e-13	0.00505505	0.999991	0.00729895	-1.12139	-0.226441	-1.08519	2.29627	3.98536e-06	2.13674
Q6L8Q7	4	4	281.55	2',5'-phosphodiesterase 12 OS=Homo sapiens GN=PDE12 PE=1 SV=2 - [PDE12_HUMAN]	39429.9	50659.4	39903.1	45139.2	42725.8	48784.4	32621.7	32315.8	23380.9	14451.9	16900.9	26992.5	46306.9	42416.1	43892.4	37140.7	27603.2	63782.3	22705.1	28533.8	24756.7	18520.3	36765.7	30912.9	1.57562e-11	0.000930705	1	0.0224183	-0.862391	-0.0300707	-0.717177	3.03119	3.81223e-12	1.6494
P99999	7	4	304.04	Cytochrome c OS=Homo sapiens GN=CYCS PE=1 SV=2 - [CYC_HUMAN]	97181.5	127602	106577	145680	93137.5	138081	168888	158388	139963	174310	143812	143568	136187	147152	144976	181421	123214	135781	181641	177581	182697	162969	161523	170844	7.64873e-10	0.052663	0.409408	0.000378965	0.391292	0.294631	0.550424	1.27849	0.387844	3.4214
Q9NR12	4	4	168.39	PDZ and LIM domain protein 7 OS=Homo sapiens GN=PDLIM7 PE=1 SV=1 - [PDLI7_HUMAN]	50242.1	55552.1	57299.4	73852.4	82439.5	82653.2	47389.5	45311.7	40557.5	56102	55664.5	47580.8	45848.7	44467.9	44439.7	62421	73048.3	66778.7	38158.5	33271.2	49115.1	49310.2	53271	48555	3.0243e-12	0.187214	0.936405	0.019758	-0.458375	-0.254568	-0.565421	0.727662	0.0285363	1.70426
P62273	4	4	169.96	40S ribosomal protein S29 OS=Homo sapiens GN=RPS29 PE=1 SV=2 - [RS29_HUMAN]	59539.7	44015.8	52451.5	64449.2	54592.9	67016.2	70289.4	41744.9	74941.8	71938.7	95960	79645	70064.5	64690.9	47086.1	95327.3	115872	65276.8	75390.6	67684.2	98222.1	120956	77838.1	79571.9	1.95988e-06	0.999185	0.994138	0.738461	0.34515	0.422077	0.603303	0.000354175	0.00255335	0.131672
O95235	4	4	202.07	Kinesin-like protein KIF20A OS=Homo sapiens GN=KIF20A PE=1 SV=1 - [KI20A_HUMAN]	6795.95	9062	5640.87	8780.43	9007.11	8736.24	27473.5	35947.4	22631.1	46618.1	28271.2	26869.6	6843.59	10336.8	11972.1	15704.9	10460.4	10204.3	28969.8	27127.4	34811.3	35979.2	25936.7	24482.1	2.37567e-29	4.35637e-10	0.775495	4.35931e-10	1.9675	0.448268	1.88446	9.36088	0.110421	9.36058
Q8NFH4	4	4	152.95	Nucleoporin Nup37 OS=Homo sapiens GN=NUP37 PE=1 SV=1 - [NUP37_HUMAN]	29082.8	33315.8	29884.9	37012.6	37434	31529.6	30296.1	35093.5	25835.4	27895.1	24721.3	25472.4	27987.6	26783.9	33656.1	28842.8	27498.4	23583.8	27193.5	26823.5	20512.4	30425.7	31438.4	18610.2	0.154786	0.99095	0.988523	0.63094	-0.22769	-0.235904	-0.355088	0.0039481	0.00501308	0.200012
P56134	4	4	217.42	ATP synthase subunit f, mitochondrial OS=Homo sapiens GN=ATP5J2 PE=1 SV=3 - [ATPK_HUMAN]	49792.8	38961.2	21748.8	56925.2	32406.4	23688.1	70198.9	69173.8	50773.6	96089.3	71238	65805.3	47892.2	71084.6	32390	98456	56005.2	40003.7	85986.3	108112	54241.7	107164	77077.4	75769.5	3.49829e-10	0.000348078	0.154818	1.56762e-06	0.921188	0.629649	1.1854	3.45832	0.810178	5.80476
O95747	4	4	153.45	Serine/threonine-protein kinase OSR1 OS=Homo sapiens GN=OXSR1 PE=1 SV=1 - [OXSR1_HUMAN]	11326.6	15765.2	12394.3	2346.09	4533.56	12779.3	12730.9	14845	10078.7	1687.46	2194.67	11016.5	10300	12956	12710.6	2649.61	3934.23	13547.8	7540.81	12340.3	10636.5	1255.96	5241.42	14979.9	0.999999	1	1	1	-0.170478	-0.0763013	-0.185883	7.38453e-10	0	3.67478e-11
Q99661	7	4	312.68	Kinesin-like protein KIF2C OS=Homo sapiens GN=KIF2C PE=1 SV=2 - [KIF2C_HUMAN]	36127.6	43282.6	9247.28	18506.2	20664.7	35227.9	85140.8	99440	54507	49240	50423.7	66382.1	37668.5	44032.6	32323.3	27521.7	24338.1	50012.4	68428.3	70689.5	65002.3	50682.3	54591.3	85227.2	1.96137e-12	1.3189e-06	0.638013	1.48793e-06	1.31303	0.404971	1.2751	5.87979	0.195171	5.82742
Q5T6F2	4	4	185.95	Ubiquitin-associated protein 2 OS=Homo sapiens GN=UBAP2 PE=1 SV=1 - [UBAP2_HUMAN]	18516.5	32030.5	12872.8	20765.4	24982.8	36107.7	23361.2	16588.2	7712.86	6083.76	7921.99	18638.6	28023.5	14900.2	20633.6	14006.7	23698.9	31975.3	12591.2	11734.7	13540	11610.8	25155.6	13479.9	2.09639e-18	0.0125329	1	0.249305	-0.855201	-0.124786	-0.721376	1.90195	2.1993e-10	0.603268
P17858	7	4	441.68	6-phosphofructokinase, liver type OS=Homo sapiens GN=PFKL PE=1 SV=6 - [K6PL_HUMAN]	57320.9	61621.7	58753.7	58399.5	57891.1	74855.6	43307.1	54560	36581.6	24511.3	32123	36502.5	56562.8	55864.4	52602.4	56609.4	49418.4	66327.3	39088.6	39075.1	43902.5	32423	50110.2	37768.3	1.07819e-08	0.000939336	0.999994	0.0153262	-0.696597	-0.12861	-0.605808	3.02718	2.68013e-06	1.81456
Q16795	4	4	148.56	NADH dehydrogenase [ubiquinone] 1 alpha subcomplex subunit 9, mitochondrial OS=Homo sapiens GN=NDUFA9 PE=1 SV=2 - [NDUA9_HUMAN]	3785.31	5684.43	1816	5748.32	2731	3854.17	5744.63	9240.56	13274	9079.09	12184.2	23323.6	6252.5	18927.4	3270.89	8851.82	10412.8	8503.84	16315.7	32575.4	10514.5	18367.8	4155.34	19326.6	6.33903e-06	0.117197	0.614468	0.0133361	1.62489	1.2511	2.09996	0.931083	0.211501	1.87497
Q6IN85	4	4	168.58	Serine/threonine-protein phosphatase 4 regulatory subunit 3A OS=Homo sapiens GN=SMEK1 PE=1 SV=1 - [P4R3A_HUMAN]	19595.8	24184.5	16211.1	10195	15331.4	30111.9	37203.8	30393.2	22399.2	16113.2	16303.2	24439.1	21687.4	22911.6	21567.5	18000.8	13213.4	24351.3	21756.7	25116.4	28087.1	11867.1	24264.4	31077.5	0.104421	0.997439	1	0.999397	0.344849	0.0741972	0.298097	0.00111375	3.85403e-10	0.00026185
Q9NW13	4	4	216.14	RNA-binding protein 28 OS=Homo sapiens GN=RBM28 PE=1 SV=3 - [RBM28_HUMAN]	10770.8	10893.7	11605.4	31430.2	22529.3	18243.7	25396.5	27526.6	32776.8	54162.9	52358.8	46163.7	20486.2	23818.9	17330.4	33207.7	28601	26685.5	28632.1	39779	38024.2	57649.8	31255.4	46410.3	3.24853e-09	0.000966506	0.670123	0.000493525	1.17642	0.509335	1.19665	3.0148	0.173846	3.30669
P51571	4	4	159.79	Translocon-associated protein subunit delta OS=Homo sapiens GN=SSR4 PE=1 SV=1 - [SSRD_HUMAN]	29008.8	21510.4	23161.7	47650.9	37534.3	22423.9	51342	43295.7	63360.2	105167	78650.4	77805.5	67319.6	89168.7	37109.5	81593.2	90745.9	59787.9	102270	145660	54835.3	138639	87139.8	58636.9	1.54401e-05	0.00742168	0.00583058	1.8524e-05	1.21079	1.23162	1.6955	2.1295	2.23429	4.73227
Q8WWK9	4	4	147.29	Cytoskeleton-associated protein 2 OS=Homo sapiens GN=CKAP2 PE=1 SV=1 - [CKAP2_HUMAN]	3872.83	3261.03	5187.67	9299.95	5697.89	3791.39	19348.9	17649.3	16932.1	18274.3	18119.3	19099.2	8727.5	10495.2	7939.16	10863.1	10049.6	12689.6	18192.8	12990.1	21875.6	26657.7	19626.7	16134.5	4.50931e-23	4.50565e-10	0.000817617	4.41421e-10	1.81443	0.965808	1.89213	9.34624	3.08745	9.35515
O00743	4	4	211.41	Serine/threonine-protein phosphatase 6 catalytic subunit OS=Homo sapiens GN=PPP6C PE=1 SV=1 - [PPP6_HUMAN]	29016.9	32691.7	28646.8	32206.1	34405	35415.3	17216.5	14161.6	12591.2	14089.4	13247.9	12324.4	20980.1	17617.9	24146.5	18560.1	21221.1	26374.7	12106.5	10729.1	16312.9	15983.1	14775.3	13245.6	6.35686e-19	5.2483e-10	0.0105251	4.8931e-10	-1.20186	-0.577715	-1.21014	9.27998	1.97777	9.31042
P45973	6	4	278.98	Chromobox protein homolog 5 OS=Homo sapiens GN=CBX5 PE=1 SV=1 - [CBX5_HUMAN]	5147.36	12828	8548.16	29908.8	10236.7	12292.2	36101.3	21256.3	35939.9	53130.5	43844.4	41169.6	36561.9	31147	11024.1	31083.9	38649.5	30525.6	50019.7	37997.5	36247	62856.7	53089	45329.1	3.78449e-08	0.00108746	0.0535347	2.80683e-05	1.55143	1.18068	1.85447	2.96359	1.27136	4.55178
O96005	5	4	304.95	Cleft lip and palate transmembrane protein 1 OS=Homo sapiens GN=CLPTM1 PE=1 SV=1 - [CLPT1_HUMAN]	22836.6	10449.5	9605.66	20562.7	9106.21	17673.1	30527.9	19584.8	29384	37062.2	23141.3	43020.8	26887.5	35236.8	15785.4	25468.5	31217.7	41548.7	36177.7	62364.7	29404.9	34976	32474.3	32467.2	0.000240096	0.0555876	0.100078	0.00165237	1.0179	0.96502	1.33644	1.25502	0.999663	2.78189
Q96CN7	4	4	171.06	Isochorismatase domain-containing protein 1 OS=Homo sapiens GN=ISOC1 PE=1 SV=3 - [ISOC1_HUMAN]	56061.9	59351.7	55258.1	46765.4	64950.4	65104	43446.1	42365.2	35426.8	30302.1	35742.9	39069.8	39254.3	45880.8	55440.7	37613.7	45271.1	54154.2	17782.3	41992.9	36308.7	35154.1	53210.7	39552.2	3.77667e-12	0.00408574	0.662483	0.000546678	-0.618404	-0.323893	-0.633473	2.38873	0.178825	3.26227
P34896	5	4	354.66	Serine hydroxymethyltransferase, cytosolic OS=Homo sapiens GN=SHMT1 PE=1 SV=1 - [GLYC_HUMAN]	28519.8	38808.1	25905.4	27439.8	33572.1	49309.2	25860.4	30190.2	16336.4	12453	12623.6	23905.2	29241.3	22665	25078.1	14381.5	21420	39584.4	18380.3	17844.8	18047.2	14275.4	23198.9	26648.1	3.51466e-12	0.0128136	0.700113	0.0180187	-0.746016	-0.417834	-0.781812	1.89233	0.154832	1.74428
P19623	4	4	180.86	Spermidine synthase OS=Homo sapiens GN=SRM PE=1 SV=1 - [SPEE_HUMAN]	77495.2	97105.3	69661.3	65115.9	86615.3	104301	44414	55608.4	35341.6	40664.6	53094.1	45281.1	57945.6	67825	60923.5	57620.3	69078.2	74313	39779.4	48094.2	39923.7	57280	50507.3	46085.1	6.5079e-23	9.69068e-08	0.309187	4.5597e-07	-0.866477	-0.367816	-0.828774	7.01365	0.509779	6.34106
Q14764	4	4	190.15	Major vault protein OS=Homo sapiens GN=MVP PE=1 SV=4 - [MVP_HUMAN]	15479.8	27062.9	30474.6	13698.4	21762.7	32799.5	5268.66	7248.62	10762.4	6426.72	7083.17	8353.6	25332.9	26906.6	37032	24576.5	30502.3	45560.1	8692.57	21941.7	11299.5	13109.7	10441.2	14817.6	1.02677e-19	6.71766e-08	0.849537	0.0629455	-1.64596	0.426783	-0.815025	7.17278	0.0708178	1.20104
Q8TAQ2	4	4	398.3	SWI/SNF complex subunit SMARCC2 OS=Homo sapiens GN=SMARCC2 PE=1 SV=1 - [SMRC2_HUMAN]	29141.4	27072.2	13826.3	26261.2	16853.6	26779.1	52036.5	43003.4	34810.9	26437.8	21305.1	49087.5	36203.2	31789.6	30215.2	32404.8	16690.3	35505.6	44747.8	42116.1	44139.9	18776.2	32903.4	47554	0.00512045	0.255097	0.958984	0.192388	0.69592	0.385591	0.718379	0.593295	0.0181887	0.715822
Q9NQ88	4	4	278.27	Fructose-2,6-bisphosphatase TIGAR OS=Homo sapiens GN=TIGAR PE=1 SV=1 - [TIGAR_HUMAN]	45910.7	53003.5	44082.6	48607.4	53871.1	50532.7	78321.2	81580.2	41294	45584.7	54271.9	64190.3	81759.1	73130.6	66711.7	64723.4	59459.2	103793	81522.1	73779.2	63109.1	60376.7	85543	84185.5	1.81206e-09	0.953277	0.0206927	0.0172801	0.303219	0.602932	0.599523	0.0207809	1.68418	1.76245
Q9UHY7	4	4	275.26	Enolase-phosphatase E1 OS=Homo sapiens GN=ENOPH1 PE=1 SV=1 - [ENOPH_HUMAN]	36080	49874.6	28194.3	14157.7	21520.2	41857.9	27266.8	38363.5	16012.6	12336	12570	24287	35839.8	35879.1	32605.4	9486.89	15591.2	37182.1	26429.8	35858.8	23252.4	8218.93	13443.5	28599.8	0.696459	0.995464	1	0.997233	-0.550976	-0.202481	-0.497217	0.00197431	2.42121e-08	0.00120334
P14735	4	4	180.26	Insulin-degrading enzyme OS=Homo sapiens GN=IDE PE=1 SV=4 - [IDE_HUMAN]	71685.7	74258.3	63469.3	53473.2	62782	88338.4	44391.4	47558	28113.7	28114.9	31842.1	45142.9	59051.1	56810.6	58743.8	36371.6	49099.5	74757.5	36324.5	41254.2	42089.9	35410.3	44599.6	43286.9	2.10172e-11	2.43739e-06	0.733556	0.000152973	-0.878685	-0.306209	-0.768904	5.61307	0.134567	3.81538
Q96DB5	4	4	201.64	Regulator of microtubule dynamics protein 1 OS=Homo sapiens GN=RMDN1 PE=1 SV=1 - [RMD1_HUMAN]	38559.1	44404.8	39636.6	46900.2	41642.8	61466.1	39090.9	47030.7	38926.9	41545.1	21066.3	35692.9	27434.8	49981.5	44040.9	49817.8	27158.2	52018.8	45440	49593.1	47781.7	19719.5	28634.5	36250.9	0.000124946	0.997409	1	0.99706	-0.287511	-0.122302	-0.261479	0.00112657	8.12874e-08	0.00127886
Q16822	4	4	264.99	Phosphoenolpyruvate carboxykinase [GTP], mitochondrial OS=Homo sapiens GN=PCK2 PE=1 SV=3 - [PCKGM_HUMAN]	109185	76642.4	75226.9	96932	99920.3	119752	64250.8	91622.6	56995.6	83697.5	60331.3	68543	59615.2	61969.7	55802.2	63277.2	55393.8	42496.8	55425.8	60151.5	54472.3	48813.6	69525.5	50741.1	0.000130416	0.762229	0.0310498	0.0331471	-0.441258	-0.770827	-0.768379	0.117914	1.50794	1.47955
Q96FJ2	8	4	350.38	Dynein light chain 2, cytoplasmic OS=Homo sapiens GN=DYNLL2 PE=1 SV=1 - [DYL2_HUMAN]	36252.1	34552.4	31715.8	70135.3	74568.8	48919.3	19944.1	31666.7	26409	59293.1	55761.7	32064.6	26343.2	23648.7	25290.1	34149.1	57075.6	32210.7	20421.8	26867.8	23673.5	54558.8	45396.2	22657.2	0.626946	0.99742	0.951895	0.873602	-0.39548	-0.575579	-0.613403	0.00112179	0.0214108	0.0586864
Q9UNX4	4	4	254.41	WD repeat-containing protein 3 OS=Homo sapiens GN=WDR3 PE=1 SV=1 - [WDR3_HUMAN]	30572.3	24809.2	25141.7	36977.9	31716.2	27310.7	33069.7	30212.3	49417	48228.6	44711.6	62940.2	53154.1	50887.8	31679.5	54115.4	42717.1	52291.1	56697.4	66836.5	46979.3	51194.3	34404.8	54698.3	1.35848e-06	0.286902	0.0852167	0.014061	0.605451	0.690279	0.816139	0.542266	1.06948	1.85198
A5YKK6	4	4	246.4	CCR4-NOT transcription complex subunit 1 OS=Homo sapiens GN=CNOT1 PE=1 SV=2 - [CNOT1_HUMAN]	16941.4	17432.5	17470.3	25218.8	25587.3	25795.6	15507.3	14433.4	11336.3	13562.8	13716.3	12461.3	12522.3	14829.6	17398.2	15883.6	12989.5	19813.3	10804.4	12442.2	11117.6	17012.5	13184.4	14159.9	3.08232e-10	0.0503065	0.531543	0.0211813	-0.664859	-0.459105	-0.706341	1.29838	0.274462	1.67405
P50502	10	4	527.74	Hsc70-interacting protein OS=Homo sapiens GN=ST13 PE=1 SV=2 - [F10A1_HUMAN]	104711	103610	86663	52174.2	64385.3	134405	76169.9	89535	68349.2	45012.8	36568.8	58736.8	71249.9	70436.7	86037.9	46775.8	47969	90921.4	54999.7	71153.3	69590.7	39544	66382.8	65569.1	0.0202126	0.537031	0.950025	0.569022	-0.54429	-0.401259	-0.572043	0.27	0.0222651	0.244871
O95782	7	4	302.28	AP-2 complex subunit alpha-1 OS=Homo sapiens GN=AP2A1 PE=1 SV=3 - [AP2A1_HUMAN]	26776.6	36435.3	21665.5	35175	28552.5	33086.7	29462.7	32653.1	23385.7	39391.6	30376.4	27871	29117.6	48519.3	23899	59483.8	35083	26830.6	35190.8	39278.4	35949.5	33594.6	34391.2	28041.1	1.96137e-12	1	0.968748	0.994828	0.0114592	0.295121	0.18427	0	0.013789	0.00225189
Q9UBQ7	4	4	174.05	Glyoxylate reductase/hydroxypyruvate reductase OS=Homo sapiens GN=GRHPR PE=1 SV=1 - [GRHPR_HUMAN]	39375.4	37147	29442.3	58484.2	61475.9	62254.3	27430.1	30676.5	15074.6	24632.4	18833.7	24485	28719.9	26442.8	23375.1	35618.1	38372.1	42738.6	20991.1	26012.5	20274.2	24557.5	31322.2	26659.5	5.09944e-07	0.000103506	0.317109	0.00100744	-1.02992	-0.561521	-0.943764	3.98504	0.498791	2.99678
Q9NVA2	7	4	328.37	Septin-11 OS=Homo sapiens GN=SEPT11 PE=1 SV=3 - [SEP11_HUMAN]	2237.04	2264.51	1527.9	2655.79	2236.66	2032.97	4235.65	4114.95	8910.08	1709.36	12822.6	12123.3	12541.6	8323.6	1902.11	2638.18	18560.3	5940.62	7266.65	11441.9	9159.85	16955.2	3727.63	10244.4	1.23596e-05	0.55808	0.459654	0.0691071	1.76125	1.94573	2.18221	0.253304	0.337569	1.16048
Q13907	4	4	173.44	Isopentenyl-diphosphate Delta-isomerase 1 OS=Homo sapiens GN=IDI1 PE=1 SV=2 - [IDI1_HUMAN]	10134.6	13034.3	14841.3	19485.6	21589.2	14376.5	9732.2	11147.4	6729.04	6666.2	7337.69	12025.4	16938.1	14998.1	21551.4	7518.78	29804.2	26539.3	10824.2	6263.52	7590.13	20214	16850.4	15420.3	3.54841e-08	0.4124	0.999995	0.99917	-0.801118	0.328375	-0.276471	0.384681	1.97399e-06	0.000360789
P63279	4	4	151.12	SUMO-conjugating enzyme UBC9 OS=Homo sapiens GN=UBE2I PE=1 SV=1 - [UBC9_HUMAN]	57058.5	55727.9	55836.9	27920.9	35780.1	58173.9	34333.6	35639.8	39530.2	26517.4	28105.7	31925.2	45259.2	39142.7	42635.8	20682.9	27763.4	35835.2	35203	35691.3	32543.8	26566.2	36959.5	25728.4	0.00735234	0.203476	0.447029	0.144131	-0.567293	-0.459106	-0.592231	0.691486	0.349664	0.841242
P00568	4	4	204.45	Adenylate kinase isoenzyme 1 OS=Homo sapiens GN=AK1 PE=1 SV=3 - [KAD1_HUMAN]	36153.2	38714.8	28026.6	33082.4	36859.2	39301.4	25105.7	30396.1	18515.5	22906.6	24109.9	22491.2	41561	44683.3	43964.8	48199.5	46281.7	46592.4	28210.7	33630.2	32597.3	36227.2	34335.6	30181.6	3.69774e-27	0.000263922	0.129165	0.999867	-0.563697	0.354797	-0.120175	3.57852	0.888854	5.7893e-05
Q9ULX3	4	4	148.36	RNA-binding protein NOB1 OS=Homo sapiens GN=NOB1 PE=1 SV=1 - [NOB1_HUMAN]	35624.4	41831.7	29125.4	26917.7	27067.1	46969.5	19630.8	21372.6	20620.2	17699.5	14643	20925.1	24073.2	31942.5	26740	22326.5	20820.6	27285.2	20110.5	26086.9	20565.1	19212.6	14258.3	24299.4	9.57975e-23	4.14383e-06	0.194282	9.99087e-05	-0.853092	-0.438057	-0.736835	5.3826	0.711567	4.0004
Q15061	4	4	246.31	WD repeat-containing protein 43 OS=Homo sapiens GN=WDR43 PE=1 SV=3 - [WDR43_HUMAN]	10122.5	8203.69	7481.03	23826.2	15979.6	5350.38	16812.6	19874.2	67237.8	55866.2	73205.6	58994.8	45869	33211.2	20370.9	45163.9	45867.4	26018.4	57552.8	54785.5	40626.8	74608.9	27468.8	43512.2	1.87373e-06	0.000377976	0.00520779	6.22239e-05	2.04078	1.60922	2.07285	3.42254	2.28335	4.20604
P46783	4	4	244.65	40S ribosomal protein S10 OS=Homo sapiens GN=RPS10 PE=1 SV=1 - [RS10_HUMAN]	380569	360936	292183	252141	187308	315356	407988	366518	440146	237923	346427	452666	458434	528224	294344	367005	396958	363247	401298	461667	469025	366646	279744	432636	1.65908e-09	0.966403	0.758086	0.741355	0.33225	0.429219	0.430897	0.0148419	0.120281	0.129974
P20810	4	4	251.52	Calpastatin OS=Homo sapiens GN=CAST PE=1 SV=4 - [ICAL_HUMAN]	66670.2	72660.7	50243.2	42981.4	55410.4	74831.7	54604.4	59434	34771	24981.4	34660.1	39626.3	55113.4	56203.3	58763.4	50116.9	45633.2	77480.1	37262.8	55896.1	51444.4	34174.5	54124.1	51036.9	3.98697e-13	0.0379925	1	0.734383	-0.548377	-0.0796522	-0.353585	1.4203	2.01715e-10	0.134077
Q9Y696	4	4	222.65	Chloride intracellular channel protein 4 OS=Homo sapiens GN=CLIC4 PE=1 SV=4 - [CLIC4_HUMAN]	110885	111198	101625	63784.6	100253	146270	89504.9	88724.2	56862.7	56252.6	52823.3	78714.4	54059.9	49702.6	60806.6	39366.4	59667.9	76982.8	55318.1	61540.1	59035	33746	74365.4	72742.8	4.55617e-13	0.0251158	1.15423e-05	4.95896e-05	-0.584263	-0.896499	-0.829615	1.60005	4.93771	4.30461
Q9Y4P1	4	4	247.22	Cysteine protease ATG4B OS=Homo sapiens GN=ATG4B PE=1 SV=2 - [ATG4B_HUMAN]	40816.6	50021.8	37924.6	37718.7	49377.2	61104.9	26776.1	29164	20335.5	21320.4	13240.7	20987	29811.8	26918.9	35942.8	25920.3	28062.5	46821	27263	22642.4	25034.7	17418.1	31103.5	26537.8	1.59589e-17	7.25094e-08	0.0909587	2.54437e-05	-1.07109	-0.517533	-0.884739	7.13961	1.04116	4.59442
P62879	10	4	644.8	Guanine nucleotide-binding protein G(I)/G(S)/G(T) subunit beta-2 OS=Homo sapiens GN=GNB2 PE=1 SV=3 - [GBB2_HUMAN]	20410.4	16095.1	15646	15205.6	12579.9	10099.1	35911.4	26746.5	42006.2	38942.4	32998.5	30049.6	25983.1	27973.5	18453.1	22936.6	21001.5	8904.7	34684.9	30542.3	25509.3	32174.3	26289.4	20207	1.20661e-07	1.24192e-06	0.742751	0.000747081	1.19865	0.476266	0.91192	5.90591	0.129157	3.12663
Q9H7B2	4	4	99.34	Ribosome production factor 2 homolog OS=Homo sapiens GN=RPF2 PE=1 SV=2 - [RPF2_HUMAN]	3096.32	3925.13	3744.48	10540.3	9073.65	5623.95	7295.04	4577.52	34371.1	20090.3	28627.2	30956	16535.1	20460.7	3298.07	13543.4	25451.8	13881	19126	21453.9	16900.9	29395.6	10493.1	21776.9	0.000301903	0.0253349	0.196347	0.00540672	1.80625	1.37171	1.72651	1.59628	0.706975	2.26707
Q8IWA0	4	4	220.17	WD repeat-containing protein 75 OS=Homo sapiens GN=WDR75 PE=1 SV=1 - [WDR75_HUMAN]	3146.96	4128.13	3901.63	11413.6	5991.93	5995.61	8263.19	6565.48	29255.5	23406.8	26601.3	32601.2	20123.1	17046.6	9002.6	17824	23199.1	19391.9	21885.7	23546	18619.5	26426.3	12750.8	24827.1	0.000227464	0.01152	0.0185014	0.00195803	1.87342	1.62412	1.88885	1.93855	1.7328	2.70818
Q9H6R4	4	4	105.45	Nucleolar protein 6 OS=Homo sapiens GN=NOL6 PE=1 SV=2 - [NOL6_HUMAN]	1467.58	3699.38	2029.5	6354.41	1772.44	1585.17	3437.39	9440.77	12853.1	18919.3	18861.3	19129.6	7259.54	13891.8	3220.66	13456.6	14836	8693.61	7793.19	13890.4	8771.43	16469.4	11655.1	17988.8	6.78324e-08	3.01253e-06	0.000241865	2.0193e-06	2.28912	1.85951	2.179	5.52107	3.61643	5.6948
Q8WU90	4	4	206.72	Zinc finger CCCH domain-containing protein 15 OS=Homo sapiens GN=ZC3H15 PE=1 SV=1 - [ZC3HF_HUMAN]	58699.2	74969.4	48421.6	46074.9	60035.3	102900	42020.8	49549.3	35237.1	28914.6	32362.9	49790.9	44586.2	62594.3	46147.7	43039.1	35632.8	71148.9	38921.7	59009.4	45486.9	25698.9	43296	52728.4	4.19749e-20	0.0111786	0.824566	0.12583	-0.71733	-0.367511	-0.560776	1.95161	0.0837744	0.900217
P31942	7	4	255.56	Heterogeneous nuclear ribonucleoprotein H3 OS=Homo sapiens GN=HNRNPH3 PE=1 SV=2 - [HNRH3_HUMAN]	28025	22363.4	18348.8	57217.2	28903.9	24174.2	80926.8	71441.8	172562	194553	155154	195454	102109	97188.9	26692.4	137852	127775	83651.3	131465	121084	81748	134500	103722	156178	2.18472e-13	1.41192e-09	2.82907e-05	1.75844e-08	2.28095	1.68402	2.0251	8.85019	4.54836	7.75487
Q9NVP1	5	4	274.54	ATP-dependent RNA helicase DDX18 OS=Homo sapiens GN=DDX18 PE=1 SV=2 - [DDX18_HUMAN]	38001.7	42178.5	14062.2	29894.3	20164.2	29515.3	48062.4	44270.9	63384.5	51663.9	39379.2	79233.4	42926.7	59540.8	28709.6	32117.2	43393.3	37084.3	49564.4	70680	42095.8	39867	22866.7	57095.7	0.124787	0.0796599	0.89356	0.513596	0.907284	0.487969	0.699	1.09876	0.0488761	0.289379
Q9UKF6	4	4	129.26	Cleavage and polyadenylation specificity factor subunit 3 OS=Homo sapiens GN=CPSF3 PE=1 SV=1 - [CPSF3_HUMAN]	13761	16200	14907.2	22015.3	20932.5	22245.6	19543.2	21168.2	15432.3	24734.1	19433.8	14640.6	10076.8	11966.4	15842.8	15644.9	9324.91	10050.1	15115.3	14091.4	17883.4	16064.8	14765	13636.2	1.15188e-05	1	0.00921469	0.965141	0.0627233	-0.594203	-0.265583	2.46502e-10	2.03552	0.0154091
Q13501	4	4	254.4	Sequestosome-1 OS=Homo sapiens GN=SQSTM1 PE=1 SV=1 - [SQSTM_HUMAN]	52630.4	40002.9	63648.6	85011.3	110837	93015.6	30631.9	17525	14780.7	59464.3	33340.1	21700.1	18317.4	10708.9	22700.8	36051.3	38024.8	28558.8	18172.9	14135.8	22998.7	41047.8	45591.2	24283.8	9.96813e-22	0.00770099	0.00137024	0.00423424	-1.32693	-1.52796	-1.4211	2.11345	2.8632	2.37322
P68366	42	4	2603.44	Tubulin alpha-4A chain OS=Homo sapiens GN=TUBA4A PE=1 SV=1 - [TBA4A_HUMAN]	59354.1	59507.7	36511	49181.7	50502.1	36827.3	61515.1	74911.2	52926.6	69959	45647.9	54667	77708.7	75825.3	68443.9	78075.6	59402.2	61670.4	75373.9	74502.1	59925.5	68402.8	60977.4	48873.3	0.000324101	0.74979	0.0194857	0.216126	0.301106	0.528857	0.410866	0.125061	1.71029	0.665293
Q13724	4	4	218.17	Mannosyl-oligosaccharide glucosidase OS=Homo sapiens GN=MOGS PE=1 SV=5 - [MOGS_HUMAN]	39509.7	34423	25414.7	32277.1	25394.9	25994	51208.5	54941.3	40839.6	35615.5	27869.4	45420.6	42525.5	51818.3	39844.6	39610.3	27542.8	42632.1	47364.2	42233.2	43838.5	28110.8	36377.9	50751	0.0437142	0.828797	0.933878	0.893568	0.483602	0.414775	0.442314	0.0815517	0.0297097	0.0488722
Q9NVI7	8	4	355.48	ATPase family AAA domain-containing protein 3A OS=Homo sapiens GN=ATAD3A PE=1 SV=2 - [ATD3A_HUMAN]	40532	35304.8	16396.7	67254	56716.4	28213.3	66900.7	61683.6	50429.3	93219.6	63645.7	77258.7	36345.3	61677.1	33198.5	83581.7	54415	49660.4	52205.8	49033.5	49596.9	58946.4	75176.7	74366.6	9.07577e-13	0.000196164	0.397852	0.0145633	0.757277	0.38366	0.555948	3.70738	0.400279	1.83674
Q15024	6	4	244.04	Exosome complex component RRP42 OS=Homo sapiens GN=EXOSC7 PE=1 SV=3 - [EXOS7_HUMAN]	65902.7	80026.9	74245.8	76543.7	86025.8	93447.3	76142.7	73140.6	59377.7	67985.2	61544.3	74140.1	72236	75096.3	79562.1	62933.2	56853.2	75846.4	75213.6	76058.4	58979.9	55280.8	71447	82352.2	0.0635895	0.888488	0.97271	0.941393	-0.207742	-0.1725	-0.183452	0.0513482	0.0120165	0.0262292
Q9H6S3	5	4	241.92	Epidermal growth factor receptor kinase substrate 8-like protein 2 OS=Homo sapiens GN=EPS8L2 PE=1 SV=2 - [ES8L2_HUMAN]	35662.1	27972.8	26685.2	24594.5	29837.7	38370.5	40616.2	53259.6	29963.9	21253.9	26560.8	39280.5	84116	81940.7	83516.9	75911	76737.4	110780	43622.6	55138.3	46818.4	41107.4	66905.9	60844.9	1.33003e-27	0.999991	7.54611e-10	0.00662272	0.203986	1.48615	0.779961	3.93573e-06	9.12228	2.17896
P52907	7	4	393.57	F-actin-capping protein subunit alpha-1 OS=Homo sapiens GN=CAPZA1 PE=1 SV=3 - [CAZA1_HUMAN]	316341	382424	293322	268443	327993	393784	267183	304540	234566	231178	262125	300146	273381	280457	270126	249085	239370	352146	259665	299483	262443	236830	298049	301080	1.4912e-08	0.150983	0.459411	0.454878	-0.309345	-0.252035	-0.258128	0.821071	0.337799	0.342105
Q13564	4	4	184.71	NEDD8-activating enzyme E1 regulatory subunit OS=Homo sapiens GN=NAE1 PE=1 SV=1 - [ULA1_HUMAN]	51187.4	43260.8	41147.6	24401.3	29070.9	51991.2	44999.4	42079.3	35346.1	21855.3	20526.2	37755.7	38744.5	35762.6	39533.6	20808.2	21468.1	48112.8	37219	36072.2	34661	15035.9	42605.4	40782.9	0.398905	0.999915	0.999948	0.999966	-0.251024	-0.237782	-0.22411	3.70021e-05	2.2742e-05	1.47444e-05
O00267	4	4	278.47	Transcription elongation factor SPT5 OS=Homo sapiens GN=SUPT5H PE=1 SV=1 - [SPT5H_HUMAN]	6182.41	7438.19	8306.82	12427.3	10809.2	5802.25	3513.99	8806.08	7636.64	7016.13	9560.03	11476.5	12091.2	10496.3	9978.87	15639.8	8923.15	18462.5	10058	10443.3	9676.5	7639.13	11277.5	10239.8	0.00146772	1	0.729458	0.999881	-0.0862234	0.568692	0.219326	2.54924e-10	0.136999	5.16545e-05
Q15043	4	4	266.07	Zinc transporter ZIP14 OS=Homo sapiens GN=SLC39A14 PE=1 SV=3 - [S39AE_HUMAN]	41110.4	31058.4	18481.4	62000.6	44103.8	24921.8	57338.2	59071.9	35983.1	63384.7	50710	53608.3	36373.6	49547.2	20293.2	81167.7	43530.9	25231.3	54682.1	46379.1	33597.8	52913	53453.2	36633.2	7.9231e-07	0.244954	0.999996	0.880346	0.530051	0.2085	0.324856	0.610916	1.91577e-06	0.0553465
O60271	4	4	212.88	C-Jun-amino-terminal kinase-interacting protein 4 OS=Homo sapiens GN=SPAG9 PE=1 SV=4 - [JIP4_HUMAN]	30198.2	33928.2	24987.6	29570.8	43696	47059.6	23425	19503.8	15501	14340	14761.2	16474.3	15081.6	17124.8	21522.7	16011.3	21910.7	34037.4	15126.7	19393.4	16637.1	21263.3	27678.9	24593.8	1.47536e-11	6.81062e-05	0.00924791	0.0121415	-1.00988	-0.736687	-0.748157	4.16681	2.03396	1.91573
Q9BY77	4	4	265.64	Polymerase delta-interacting protein 3 OS=Homo sapiens GN=POLDIP3 PE=1 SV=2 - [PDIP3_HUMAN]	54449.7	56121.4	36330.2	111514	96534.3	89172.8	71878.5	66323.5	40630.2	102053	51299.9	75617.3	40314.6	49702	36762.4	73402.1	64757.8	65083.1	53942.5	52098.9	65409.8	57001.7	69360	79613.8	3.48013e-10	1	0.878513	0.999998	-0.123085	-0.428394	-0.234759	5.79084e-11	0.0562519	9.84049e-07
P62995	4	4	266.96	Transformer-2 protein homolog beta OS=Homo sapiens GN=TRA2B PE=1 SV=1 - [TRA2B_HUMAN]	47913	23816.8	32317.7	24323.3	24493.1	20251.1	70186.8	44928.6	164771	104330	96989.4	130973	125493	87841	36896.9	74177.8	90422.4	70751.3	121501	72235.3	77673.1	75112.3	53928.2	58536.3	5.81888e-06	0.000484651	0.0108645	0.0160647	1.82222	1.48799	1.40672	3.31457	1.96399	1.79413
Q9NVX2	4	4	155.76	Notchless protein homolog 1 OS=Homo sapiens GN=NLE1 PE=1 SV=4 - [NLE1_HUMAN]	45769	40362.8	34763.2	33786.4	39862.9	51117.5	36230.6	36318.9	36355.7	31231.6	31182.1	47710.2	40094.7	37988.9	28087.9	26223.9	30520.6	43020.3	32270	37323.2	36558.5	35396.1	30899.1	44911.7	1.87406e-09	0.999979	0.992082	0.999963	-0.165551	-0.254475	-0.176596	9.20984e-06	0.00345262	1.59434e-05
Q96QD8	4	4	222.05	Sodium-coupled neutral amino acid transporter 2 OS=Homo sapiens GN=SLC38A2 PE=1 SV=2 - [S38A2_HUMAN]	29557.8	24424.4	16203.7	31850.6	23399.7	24830	9174.25	9706.23	10883.2	10370.4	11809.1	12224.8	18124.7	23439.4	9782.16	24115.9	32174.6	16553.8	12993.4	29052.4	9670.95	20959.9	13100.1	11678.3	2.20805e-29	0.00689303	0.99927	0.567089	-1.2276	-0.274965	-0.624711	2.16159	0.00031697	0.246349
Q16181	6	4	334.95	Septin-7 OS=Homo sapiens GN=SEPT7 PE=1 SV=2 - [SEPT7_HUMAN]	37839.4	27628.7	24138.4	10877.1	17443.9	20004.1	34675.3	36169.5	61182.5	13062.7	43196.4	71412.9	71091.3	63085.2	27477.5	15919.4	57311.7	39194	48891.4	59152.7	33933.2	28232.7	15173	52982.3	0.00384805	0.83456	0.706807	0.918889	0.91289	0.99064	0.789222	0.0785423	0.150699	0.0367368
P35251	4	4	316.17	Replication factor C subunit 1 OS=Homo sapiens GN=RFC1 PE=1 SV=4 - [RFC1_HUMAN]	26578.8	28152.3	28548.7	24464.7	21741.2	34870.1	38931.7	44558	35152.4	40325.5	15086.2	43128.5	27257	28780.8	31811.1	32995.4	15272.3	36841.6	35784.6	28952.2	38583.7	19926.7	25349.9	39440.1	2.78974e-05	0.968464	1	0.999994	0.402085	0.0736006	0.194196	0.0139165	0	2.71152e-06
Q9H3P7	4	4	267.1	Golgi resident protein GCP60 OS=Homo sapiens GN=ACBD3 PE=1 SV=4 - [GCP60_HUMAN]	62928.7	55636.7	44444.9	59668.2	58787.2	69816.2	31291.5	35912.8	24089	40570.4	37755.3	38248.2	38849.5	31887	36322.7	48449.1	42990.5	50560.1	30602.4	39235.5	32992.5	42794.4	55497.3	46698.8	6.41337e-08	0.000765883	0.155115	0.11737	-0.756966	-0.496142	-0.503331	3.11584	0.809345	0.930442
O75223	5	4	230.63	Gamma-glutamylcyclotransferase OS=Homo sapiens GN=GGCT PE=1 SV=1 - [GGCT_HUMAN]	23215.7	41600.6	22111.1	34946.5	31396	19956.5	11215.8	19400.8	7313.14	17464.3	10014.3	9541	23617.6	15127.2	14073.3	18869.8	11462	16911.7	15487.9	11089.2	10450.5	26675.3	20808.8	15869.5	1.12935e-07	0.0332613	0.656654	0.577821	-1.20867	-0.79177	-0.78717	1.47806	0.182664	0.238206
Q13442	4	4	253.82	28 kDa heat- and acid-stable phosphoprotein OS=Homo sapiens GN=PDAP1 PE=1 SV=1 - [HAP28_HUMAN]	131068	137950	125180	112050	116328	192394	114223	118505	89573.7	82451.3	78083.8	116749	116457	114891	86745.9	87307.5	89239.3	142938	122742	114980	113725	80287.6	110183	123687	1.1057e-17	0.0268004	0.188791	0.581659	-0.442782	-0.354147	-0.292084	1.57186	0.724018	0.235331
O43837	4	4	310.22	Isocitrate dehydrogenase [NAD] subunit beta, mitochondrial OS=Homo sapiens GN=IDH3B PE=1 SV=2 - [IDH3B_HUMAN]	34168.1	33733.4	31923.9	43790.9	35359.2	26091.6	38336.9	49381.4	26295.3	55510.9	33600.4	34555.5	47219	36172.6	40306.7	57857.8	21269.1	39671.6	46073.4	33577.5	39077.7	40393.2	38889.3	31881.2	3.61733e-19	1	0.999999	1	0.212927	0.24187	0.164862	1.63707e-07	3.99276e-07	4.88259e-08
P05386	7	4	345.71	60S acidic ribosomal protein P1 OS=Homo sapiens GN=RPLP1 PE=1 SV=1 - [RLA1_HUMAN]	610725	474255	608622	358667	310975	357037	737506	438620	827989	340201	707376	757216	785786	768640	514415	605311	633561	570820	651510	553555	599468	597892	425437	661583	4.11832e-06	0.880891	0.686551	0.969052	0.485622	0.511755	0.359242	0.0550781	0.163327	0.0136531
Q9H3U1	5	4	327.1	Protein unc-45 homolog A OS=Homo sapiens GN=UNC45A PE=1 SV=1 - [UN45A_HUMAN]	63238	78908.4	51314.8	49228.3	63889.5	80908.5	43605.8	49453.6	30588.5	33563.8	31129.3	45427.7	56469.2	52932	51728.1	39816.4	37911.8	75161.8	39235	55988	46932.6	46926.5	56428	56037.5	2.73482e-19	5.42531e-05	0.631833	0.453043	-0.729067	-0.303295	-0.361764	4.26558	0.199398	0.343861
Q92979	5	4	190.14	Ribosomal RNA small subunit methyltransferase NEP1 OS=Homo sapiens GN=EMG1 PE=1 SV=4 - [NEP1_HUMAN]	16203.9	13307.6	11169.5	15995.5	14180.7	6255.5	29005.8	22602.9	53300	42800.8	47015.2	40318	31709.8	27516.5	16749.8	31819.9	29521.4	17317.9	36101.3	16279.3	25412	29484.8	20051.2	16706.2	1.03365e-08	6.74482e-06	0.0296537	0.0983705	1.60788	1.00383	0.901377	5.17103	1.52792	1.00713
Q92688	11	4	601.19	Acidic leucine-rich nuclear phosphoprotein 32 family member B OS=Homo sapiens GN=ANP32B PE=1 SV=1 - [AN32B_HUMAN]	245789	288038	219628	310420	333486	301283	182660	204285	156589	193900	238116	160259	152613	149877	157750	164784	185833	179447	179151	191676	196711	192655	267975	200871	2.27229e-10	0.012997	0.000101807	0.133018	-0.580662	-0.778438	-0.466854	1.88616	3.99222	0.876088
P16949	6	4	296.91	Stathmin OS=Homo sapiens GN=STMN1 PE=1 SV=3 - [STMN1_HUMAN]	385500	392547	379068	421834	473730	470472	245863	253507	209730	223393	265595	234668	256068	213331	288493	247479	298376	324014	268161	275410	284546	263069	433657	284233	9.33213e-14	1.11025e-07	7.30814e-05	0.00718166	-0.816432	-0.632337	-0.479971	6.95458	4.13619	2.14378
Q15397	4	4	141.04	Pumilio domain-containing protein KIAA0020 OS=Homo sapiens GN=KIAA0020 PE=1 SV=3 - [K0020_HUMAN]	3895.9	3455.1	3820.85	4064.7	4438.72	2917.89	9766.82	8392.86	27141.1	21935	12799.4	10290.7	12488.9	11163.3	6682.91	5970.11	6788.7	7082.5	13526.2	8790.84	6590.69	6389.62	6044.57	4346.91	1.79631e-09	0.00478894	0.497298	0.77351	1.99925	1.15113	1.01596	2.31976	0.303383	0.111534
Q12996	4	4	210.09	Cleavage stimulation factor subunit 3 OS=Homo sapiens GN=CSTF3 PE=1 SV=1 - [CSTF3_HUMAN]	7322.75	6021.18	7654.86	4810.86	5955.44	8158.98	11470.3	11688.9	20472.2	10979.3	11379.7	19646.6	16660.3	13209.3	14023.6	7704.12	11714.2	19074	9271.31	8518.98	12642.7	9254.99	9113.39	14904	2.05792e-05	0.0208788	0.03936	0.598605	1.10097	1.04513	0.674157	1.68029	1.40495	0.22286
P49247	4	4	220.39	Ribose-5-phosphate isomerase OS=Homo sapiens GN=RPIA PE=1 SV=3 - [RPIA_HUMAN]	87950.2	94866.3	85354.6	90883.4	108796	100733	69678.2	83626.2	69091.9	77495.5	87103.5	82698.1	74134.6	78548.1	71465.4	71463.6	82338.9	93998.8	76252.5	80889.8	70968.6	93701.7	100227	84991.6	0.000311128	0.241817	0.274183	0.930294	-0.275654	-0.268741	-0.165298	0.616513	0.56196	0.03138
P61163	4	4	215.65	Alpha-centractin OS=Homo sapiens GN=ACTR1A PE=1 SV=1 - [ACTZ_HUMAN]	98681	100202	110925	71300.7	83771.6	143154	81318.5	81817.8	62993.9	39059.1	47861.8	75785.5	80704.5	90718.9	100238	66328.5	60999.4	131855	87600.9	95827.6	83083.6	48178.9	76493.6	118903	0.025326	0.0479971	0.999518	0.991024	-0.644991	-0.195865	-0.25341	1.31879	0.000209237	0.00391579
O43852	4	4	199.56	Calumenin OS=Homo sapiens GN=CALU PE=1 SV=2 - [CALU_HUMAN]	109431	102037	69406.5	61393.6	50942.2	109874	77416.9	90583.1	49099.8	62378.4	42929.5	73927.1	54777.9	57557.3	55614.4	40442.5	41920.8	65897.3	69810	85089.5	62706.8	52090.3	59903.2	82137.1	0.0483025	0.996555	0.484591	0.999903	-0.344081	-0.669916	-0.289078	0.00149874	0.314625	4.22346e-05
A0MZ66	5	4	272.49	Shootin-1 OS=Homo sapiens GN=KIAA1598 PE=1 SV=4 - [SHOT1_HUMAN]	33005.9	18490.7	27120.2	33157.4	42289.6	45277.1	26388.1	22942.4	15038.4	24455.6	17355.7	23291	18585	19670.6	22219.7	19689.3	25381.4	34169.8	16618.1	25051.1	26073.6	26354.2	32094.8	33373.6	7.9283e-10	0.172429	0.488159	0.982707	-0.622606	-0.512743	-0.321089	0.76339	0.311438	0.00757606
Q9H8Y8	4	4	267.36	Golgi reassembly-stacking protein 2 OS=Homo sapiens GN=GORASP2 PE=1 SV=3 - [GORS2_HUMAN]	31387.8	46903.1	36164	41411.9	36744.3	40382.3	32715.5	39296.8	21854.7	29993.3	18078.8	24769.9	30545.4	32013.4	37155.4	35228.6	19781.2	34481.5	29789.1	41806.2	31395.6	27282.5	39306.2	31539.2	4.0605e-09	0.979754	0.999944	1	-0.482958	-0.300336	-0.212242	0.00888291	2.43053e-05	9.47089e-08
Q9UKY7	4	4	224.46	Protein CDV3 homolog OS=Homo sapiens GN=CDV3 PE=1 SV=1 - [CDV3_HUMAN]	127181	121722	110748	137651	164360	195662	103881	90576.9	75907	78188.1	103103	109918	99206.6	81981.9	83938.3	81496.5	97395.3	130139	89876.7	97175.8	117296	93942.2	158357	131962	3.40791e-25	0.00215718	0.0043997	0.588151	-0.610363	-0.578395	-0.316155	2.66611	2.35658	0.230511
Q15102	4	4	197.21	Platelet-activating factor acetylhydrolase IB subunit gamma OS=Homo sapiens GN=PAFAH1B3 PE=1 SV=1 - [PA1B3_HUMAN]	60667.6	65845.2	50529.2	62394	53515.5	70848.5	40164.3	52044.7	32623.4	34863.8	31896	36928.4	46216.4	47143.3	43493.6	44699.9	44219.7	51253.7	45882.5	60982.9	50633.7	55717.2	41389.2	45837.2	5.75766e-18	6.25254e-05	0.186589	0.730735	-0.670822	-0.393121	-0.276056	4.20394	0.729115	0.13624
Q7Z2W9	4	4	148.2	39S ribosomal protein L21, mitochondrial OS=Homo sapiens GN=MRPL21 PE=1 SV=2 - [RM21_HUMAN]	43900.5	47310.7	37580.1	42845.4	31383.4	34762.8	53272.1	59621.4	44838.4	36380.7	40412.3	52833.5	52716.7	71550.1	43213.5	51292.1	42202.7	51702.8	48690.7	61348	39741.6	37819.3	35821.3	41880.3	0.00412487	0.96673	0.588891	0.999972	0.273206	0.395032	0.157986	0.0146948	0.229965	1.23418e-05
Q00403	4	4	186.31	Transcription initiation factor IIB OS=Homo sapiens GN=GTF2B PE=1 SV=1 - [TF2B_HUMAN]	35029.2	36710.6	28566	26119.2	31094.1	38860.5	35544.5	37658.1	24108.9	26718.4	20575.9	30803.2	27309.6	27763.6	38543.8	26033.8	30656.2	32408.6	31558.8	36690.2	37669.3	24627.5	28114.3	30688.3	0.0253926	0.99996	1	1	-0.162922	-0.104046	-0.052602	1.75557e-05	3.47499e-09	0
O60493	4	4	182.89	Sorting nexin-3 OS=Homo sapiens GN=SNX3 PE=1 SV=3 - [SNX3_HUMAN]	49230.2	55476.4	38456.9	45454.3	46279.5	59649.2	45194.7	52859.2	32346.9	27848.7	31672.8	38591.5	39705.2	51299.7	42738.1	43380.6	39055.1	50376.9	47553.8	53510.8	48334.9	45135.9	33270.2	47861.9	0.00388921	0.736052	0.999997	1	-0.366214	-0.144059	-0.0955659	0.133091	1.23697e-06	4.70282e-09
O76071	4	4	246.35	Probable cytosolic iron-sulfur protein assembly protein CIAO1 OS=Homo sapiens GN=CIAO1 PE=1 SV=1 - [CIAO1_HUMAN]	71985.3	95158.3	69824.9	93704.9	92644.1	101401	67958.9	63987.4	49501.5	48854.9	50072.1	68582	72356.5	71655.8	68656.4	60353.3	75427.7	88447.1	74860.6	83673.8	61662.6	81828.8	86400.6	84627.5	6.65821e-05	0.000249238	0.72149	0.998554	-0.588494	-0.26425	-0.149538	3.60339	0.14177	0.000628482
O95881	4	4	184.51	Thioredoxin domain-containing protein 12 OS=Homo sapiens GN=TXNDC12 PE=1 SV=1 - [TXD12_HUMAN]	72877.7	70008.3	61824	86110.6	73312	66412.2	56598.8	61089.2	45779.8	60041.5	58426	42860.1	52712.7	50494.2	60563.3	71649.6	55360.9	48908.2	56133.3	80267.4	64794.3	74386.3	65460.2	52669.5	5.72659e-08	0.12554	0.375289	0.999772	-0.406633	-0.341949	-0.129027	0.901218	0.425635	9.8845e-05
P10515	6	4	304.46	Dihydrolipoyllysine-residue acetyltransferase component of pyruvate dehydrogenase complex, mitochondrial OS=Homo sapiens GN=DLAT PE=1 SV=3 - [ODP2_HUMAN]	96777.1	63852.4	111592	71871.3	70620.5	102995	102044	76208.7	98143.5	72459.7	85432.7	97176.6	98003.7	83446.7	128383	110496	73211.7	90758.3	85296	93663.2	104531	85370.5	69484.9	91506.4	0.00325093	1	0.996484	1	0.0378352	0.174569	0.0334505	8.33294e-11	0.00152967	3.43114e-11
O15145	4	4	171	Actin-related protein 2/3 complex subunit 3 OS=Homo sapiens GN=ARPC3 PE=1 SV=3 - [ARPC3_HUMAN]	5819.42	1776.21	3645.75	3123.24	3278.58	5098.25	2435.93	2524.88	2204.96	2108.65	2172.64	3619.76	3256.27	1856.09	1438.38	2342.37	2144.22	3350.53	3834.67	2861.95	3006.63	2185.35	4320.45	3686.97	5.15234e-25	0.991747	0.952567	1	-0.593948	-0.660473	-0.192844	0.0035992	0.0211044	4.93316e-12
Q7Z6Z7	5	4	304.78	E3 ubiquitin-protein ligase HUWE1 OS=Homo sapiens GN=HUWE1 PE=1 SV=3 - [HUWE1_HUMAN]	26834.5	25345.9	30943.1	33689.5	35112.9	26143.2	46104	45166.2	37773.1	36596.6	36582.6	35636.2	31696.8	26883.4	32589.6	38225.6	22070.6	22820.5	30993	24979.5	34218.6	27079.9	36473.4	31764.3	0.000402766	0.689708	1	1	0.417669	-0.0309762	0.0590498	0.161335	0	5.92386e-13
Q9NRG0	4	4	213.81	Chromatin accessibility complex protein 1 OS=Homo sapiens GN=CHRAC1 PE=1 SV=1 - [CHRC1_HUMAN]	38269.8	35130.6	30550	43247.4	35762.4	43150.2	38901.1	38690.4	32983.4	27759.3	33160.6	30386.2	30179.3	23082.3	27552.9	37660.2	35601.7	27461.1	37465	32619.2	36474.7	31228.9	45649.5	32975.9	7.08866e-14	0.998178	0.51149	1	-0.163522	-0.316759	-0.0632386	0.000792084	0.291163	1.10492e-09
Q0VDF9	4	4	206.22	Heat shock 70 kDa protein 14 OS=Homo sapiens GN=HSPA14 PE=1 SV=1 - [HSP7E_HUMAN]	25166.1	25438.6	27849	22560.9	22366.5	24583.6	29578.5	22135.4	28121	16645.3	21657.3	28797.9	24472	25796.9	24177.1	19602.1	22827.4	25519.4	23300.1	23285.4	25906.9	23336.8	26306.2	25030.1	2.59563e-23	1	1	1	-0.0100727	-0.0553556	-0.00781336	0	7.6216e-10	0
P61081	4	4	205.09	NEDD8-conjugating enzyme Ubc12 OS=Homo sapiens GN=UBE2M PE=1 SV=1 - [UBC12_HUMAN]	134470	146524	110705	120365	141763	164248	125844	128319	95914	102235	112594	115660	106101	97818.1	86289.2	98056.6	101358	127026	115350	144128	120551	117781	135384	141883	1.81931e-13	0.504201	0.0167038	1	-0.265499	-0.407786	-0.0778941	0.297396	1.77718	2.0224e-07
Q13011	5	4	326.1	Delta(3,5)-Delta(2,4)-dienoyl-CoA isomerase, mitochondrial OS=Homo sapiens GN=ECH1 PE=1 SV=2 - [ECH1_HUMAN]	46774.4	47387	59212.7	82936.9	67126.1	80299.8	56368.7	41073.9	40548.6	67701.6	44590.6	42750.7	62397.9	53127.9	68918.7	84983.9	50527.5	71950.2	64761.4	68078.7	51802.7	73629.7	59519	55506.9	9.31073e-07	0.830021	1	1	-0.38905	0.0303905	-0.0397881	0.0809112	0	0
P58546	4	4	251.83	Myotrophin OS=Homo sapiens GN=MTPN PE=1 SV=2 - [MTPN_HUMAN]	233317	270225	186547	218931	260768	323178	196583	227404	137446	150493	155539	191989	179941	170155	159934	155851	157345	253593	222316	270239	208086	198741	234180	266756	6.53058e-15	0.0189142	0.0336241	1	-0.49486	-0.471404	-0.0924268	1.72321	1.47335	4.66608e-08
Q92804	6	4	369.85	TATA-binding protein-associated factor 2N OS=Homo sapiens GN=TAF15 PE=1 SV=1 - [RBP56_HUMAN]	83016.9	54132.7	43904.7	126355	98844.8	45484	137104	100927	143227	161002	129966	110773	106440	75964.5	73348.9	141741	120895	96049.6	101905	62889.2	76125.4	84195.3	109136	53906	0.0085766	0.0794674	0.862842	0.999999	0.793523	0.443783	0.111858	1.09981	0.0640685	2.46449e-07
P78318	4	4	157	Immunoglobulin-binding protein 1 OS=Homo sapiens GN=IGBP1 PE=1 SV=1 - [IGBP1_HUMAN]	15490.2	20259.9	15381.8	15249	17974.1	31098.9	17932.9	19632	13987.1	8368.27	9323.66	16335.9	15092.4	17507.8	15461.1	13680.7	12572.9	18173.4	20052.3	20695.8	19013.3	11929.3	20302.5	19165.8	0.293472	0.983233	0.999946	1	-0.431972	-0.319974	-0.0546919	0.00734375	2.3621e-05	0
O95861	4	4	281.15	3'(2'),5'-bisphosphate nucleotidase 1 OS=Homo sapiens GN=BPNT1 PE=1 SV=1 - [BPNT1_HUMAN]	46943.2	69627.6	34101.8	48942.4	55086.5	62013.7	32233.6	36144.6	29901.2	28889.6	37465.9	41110.5	64651	33422.4	41849.8	35196.9	56918.2	60674	43096.9	52555.8	47508.4	44483.3	56864	60779.3	4.15175e-11	0.104706	0.999999	1	-0.622325	-0.113702	-0.0530156	0.980027	2.27062e-07	0
Q92520	4	4	201.74	Protein FAM3C OS=Homo sapiens GN=FAM3C PE=1 SV=1 - [FAM3C_HUMAN]	50334.5	31043.7	25021.5	40917.6	35658.2	34659.8	24403.1	29268	24671.4	28887.2	21441.8	22564.7	29570.6	51317.2	31555.7	57184.7	39826	36317.4	38499.4	52995.6	32460.2	36091.4	28951.1	26133.7	1.18238e-08	0.0436569	0.998963	1	-0.525109	0.175406	-0.0166943	1.35995	0.000450711	0
P55795	15	4	877.07	Heterogeneous nuclear ribonucleoprotein H2 OS=Homo sapiens GN=HNRNPH2 PE=1 SV=1 - [HNRH2_HUMAN]	50295.8	45072.1	34219.2	65286.8	49729.1	57086.4	56435.1	58612.8	67767	58009.9	59974	82352	55677.7	59384.1	46675.9	64810	66166.2	56526.9	53582.3	43716.5	58394.1	42336.8	50205.4	55212.2	0.000355284	0.270749	0.91986	1	0.344849	0.211158	0.00838246	0.567433	0.0362785	0
Q9H0B6	5	4	278.09	Kinesin light chain 2 OS=Homo sapiens GN=KLC2 PE=1 SV=1 - [KLC2_HUMAN]	34555.1	37971.5	25719.6	17633.1	27794.5	30067	30712.1	31992.7	15545.4	14513.4	13964	16335.9	28199.2	31564	20919	12711	19576.5	26585.8	26025.6	49269.9	22547.1	25104.4	24274.8	25758.7	3.53918e-10	0.270026	0.944398	1	-0.497532	-0.316097	-0.00632645	0.568594	0.0248451	0
P37108	4	4	274.58	Signal recognition particle 14 kDa protein OS=Homo sapiens GN=SRP14 PE=1 SV=2 - [SRP14_HUMAN]	133367	109793	124878	119744	135108	93154	165895	177839	166329	126279	145633	155858	141166	135501	149069	135815	116988	140971	157088	123280	123614	92250.5	131184	87584.1	0.000363053	0.679876	0.999214	1	0.38928	0.194712	-0.00210369	0.167571	0.000341397	0
P63151	4	4	167.8	Serine/threonine-protein phosphatase 2A 55 kDa regulatory subunit B alpha isoform OS=Homo sapiens GN=PPP2R2A PE=1 SV=1 - [2ABA_HUMAN]	69722.9	82885	72400.5	86575.3	102968	101705	67088.8	70631.4	53300.2	72944.3	66414	68189.2	50732.3	72495.7	66408.7	70018.4	66673	82211.9	73973.9	91714.5	86019.3	79556.6	95663.4	90708.4	1.91819e-08	0.278489	0.416541	1	-0.373264	-0.337611	0.00384943	0.555192	0.380343	0
Q13547	7	4	270.95	Histone deacetylase 1 OS=Homo sapiens GN=HDAC1 PE=1 SV=1 - [HDAC1_HUMAN]	56809.7	62769	45929.9	24896.6	26300.4	46730.1	70481.6	70504.1	66697	53058.6	39568.3	54844.6	63708.7	63488.6	51861.4	34833.3	30082	44568.7	53766	41382.2	55552.8	36757.5	24809	47513.8	0.00453864	0.814456	1	1	0.430995	0.131334	-0.0201529	0.0891325	1.64103e-07	0
Q12849	4	4	155.5	G-rich sequence factor 1 OS=Homo sapiens GN=GRSF1 PE=1 SV=3 - [GRSF1_HUMAN]	82480.6	46952.2	81050.3	33660.6	48900.8	18537.5	76612.1	54577.6	116059	77886.5	83337	49200.1	124594	103442	97738.7	82485.5	102582	34188	72834.1	55336.8	42204.9	73215.1	33171.9	24392.6	3.37018e-06	0.909293	0.561667	1	0.554704	0.806723	-0.0491037	0.0412961	0.250521	0
O00193	4	4	275.88	Small acidic protein OS=Homo sapiens GN=SMAP PE=1 SV=1 - [SMAP_HUMAN]	54403.8	72181	35000.3	24364.5	36801.7	69111.3	37753.6	62340.8	22770.7	8632.8	15032.2	33298.1	37045.1	48776.9	29981.9	22438.8	23261.6	52146	46256	75774.8	41926	24927.3	62997.9	51039.4	0.0473701	0.363165	0.996708	1	-0.69867	-0.450038	0.0536548	0.439896	0.00143198	0
P06753	10	4	550.23	Tropomyosin alpha-3 chain OS=Homo sapiens GN=TPM3 PE=1 SV=2 - [TPM3_HUMAN]	100772	103760	96987.3	127761	107164	121217	110000	108668	89545.6	111890	105161	90957.3	82731.1	71598.7	83116.4	84996.6	81628.6	90306.9	104551	108939	117055	109145	122245	110883	1.58145e-06	1	0.29914	1	-0.0938939	-0.411729	0.0328734	6.11727e-08	0.524125	0
Q8IWX8	4	4	123.88	Calcium homeostasis endoplasmic reticulum protein OS=Homo sapiens GN=CHERP PE=1 SV=3 - [CHERP_HUMAN]	42546.6	38682.9	41279.2	83808.3	57559.3	69074.2	44815.7	38180.5	41047.7	96729.8	76052.9	55818.5	30771.7	30106.3	35050.8	67297.2	69860.9	46169.6	36348.5	41618.6	49683.9	89004.9	64604.4	55832	0.0279931	1	0.997887	1	0.0829092	-0.253717	0.0178351	0	0.000918433	0
P18085	13	4	676.96	ADP-ribosylation factor 4 OS=Homo sapiens GN=ARF4 PE=1 SV=3 - [ARF4_HUMAN]	78758.7	150223	73497.8	121336	92140	85878.9	76187.5	120863	56017.7	82904.2	49217.2	74048.9	95078.1	89887.2	59725.3	109326	45884.4	77507.6	124309	119896	109928	94580.6	88177.5	100324	0.0033553	0.991358	0.998519	1	-0.390123	-0.334144	0.0824127	0.00376949	0.000643803	9.39288e-11
P50416	5	4	235.02	Carnitine O-palmitoyltransferase 1, liver isoform OS=Homo sapiens GN=CPT1A PE=1 SV=2 - [CPT1A_HUMAN]	44725.5	55470.1	49238.6	87708	65165.9	59205.2	52771.5	56858.6	38052	79514.8	49085.1	50029.6	47476.3	42669.4	49713.9	85306	37512.7	51224.6	54457.5	52663.1	53561.3	83105.3	66122.2	64881	3.62313e-09	0.999992	0.998405	1	-0.147798	-0.20373	0.052035	3.43205e-06	0.000693109	1.47994e-11
Q9NZZ3	4	4	192.08	Charged multivesicular body protein 5 OS=Homo sapiens GN=CHMP5 PE=1 SV=1 - [CHMP5_HUMAN]	67976.5	66987.5	50985	67677.9	68147.7	76195.7	69450.8	64281.5	51211	56591.9	49221.7	67534.1	52728.7	44600.2	48251	47226.7	54826.7	66334.4	59111	68867	65974.9	65466.3	87672.9	72192.5	7.91503e-13	0.999425	0.472496	1	-0.151529	-0.342044	0.0752689	0.000249965	0.325602	6.5307e-09
P61619	4	4	225.39	Protein transport protein Sec61 subunit alpha isoform 1 OS=Homo sapiens GN=SEC61A1 PE=1 SV=2 - [S61A1_HUMAN]	20664.3	15144.7	35135.4	14419.9	12271.7	3608.04	23000.3	15307.4	28341.6	42793.5	20018.6	5994.49	25873.2	17963.1	44164.8	29046.3	27629.8	6022.51	24569.1	18793.3	9051.07	24085	13244.4	1205.13	1.44521e-08	0.999999	0.999959	1	0.419986	0.57384	-0.154722	2.67623e-07	1.7778e-05	2.51856e-09
Q15067	4	4	210.18	Peroxisomal acyl-coenzyme A oxidase 1 OS=Homo sapiens GN=ACOX1 PE=1 SV=3 - [ACOX1_HUMAN]	35344.2	33919.4	39164.2	56442.9	44439.9	45960	35140.7	33753.7	34002	37108.5	27392	36888.4	55060	51812.7	59264.8	79429.1	45587.8	64981.6	42913.2	48116.1	37609.5	44968.7	39077.9	35964.8	1.09329e-15	0.83505	0.13784	1	-0.321442	0.480401	-0.0379103	0.0782875	0.860625	0
O95777	4	4	281.33	N-alpha-acetyltransferase 38, NatC auxiliary subunit OS=Homo sapiens GN=NAA38 PE=1 SV=3 - [NAA38_HUMAN]	41417.7	37048.2	43990.6	26790.7	28573.4	20515.8	42030	40999.7	46746.5	54093.4	44392.8	40343.8	43647.6	37892.6	39269.8	31054.6	36013.5	26331.7	46970.4	27239	30780	29614.7	31815.4	13779	0.000132539	0.958478	1	1	0.437543	0.111075	-0.138363	0.0184178	1.29425e-09	3.69993e-08
Q9Y2Z4	4	4	231.43	Tyrosine--tRNA ligase, mitochondrial OS=Homo sapiens GN=YARS2 PE=1 SV=2 - [SYYM_HUMAN]	29583.7	35259	37793.5	36567.2	20195.6	29436	45634.2	34809.2	33841.9	33568	31662	24309.7	42807	37763	44267.7	48397.1	26014.8	38840.9	30093.5	22142.5	36331.6	27083.3	22966.4	33658.7	0.00160224	0.999999	0.761313	0.999996	0.110205	0.334384	-0.132405	5.56991e-07	0.118437	1.94158e-06
P23434	4	4	259.06	Glycine cleavage system H protein, mitochondrial OS=Homo sapiens GN=GCSH PE=1 SV=2 - [GCSH_HUMAN]	96704.1	108487	83935.6	167627	131899	135872	125655	125968	70606	134250	90896.6	100599	97477.8	94212.2	97117.5	126331	93030.3	137550	115891	143246	119949	126869	138041	136556	4.93283e-13	0.999593	0.999855	0.999906	-0.161098	-0.166128	0.10746	0.000176602	6.28883e-05	4.0938e-05
Q00688	4	4	174.26	Peptidyl-prolyl cis-trans isomerase FKBP3 OS=Homo sapiens GN=FKBP3 PE=1 SV=1 - [FKBP3_HUMAN]	40938.6	67872.6	33333.3	88334.1	46087.8	35804.6	41744	55160.9	40756.5	57072.6	44277.3	44926.4	44183.8	44970.2	26279.8	71308.6	54785.4	40983	48664.1	43140.9	67235.6	54533	77440.8	46088.4	0.0220284	1	1	0.999933	-0.137686	-0.144954	0.109928	9.5589e-13	8.99457e-08	2.90815e-05
Q9BT78	5	4	345.66	COP9 signalosome complex subunit 4 OS=Homo sapiens GN=COPS4 PE=1 SV=1 - [CSN4_HUMAN]	36784.3	40395.3	46417.8	21295.6	44715.1	40313.4	48537.6	43650.5	39605.7	29916.4	30145.7	43353.9	45350.8	40328.1	53577.7	31023.4	34332.5	42422.8	46769.8	41356.5	37727	26304.3	36266.2	32445.2	0.00107635	1	0.999999	1	0.0328076	0.103577	-0.0579504	0	2.46889e-07	0
Q9Y383	5	4	301.98	Putative RNA-binding protein Luc7-like 2 OS=Homo sapiens GN=LUC7L2 PE=1 SV=2 - [LC7L2_HUMAN]	99167.4	117995	76787.7	98287.1	93763.8	139978	95106.5	94239.9	73745.4	100677	98279.3	113146	67625.6	76612.8	38233	106877	92712.5	83865.2	106145	118278	104732	126184	141963	140428	1.36835e-05	0.999999	0.14157	0.957817	-0.122066	-0.426013	0.236978	4.3281e-07	0.849029	0.0187175
P09110	4	4	196.84	3-ketoacyl-CoA thiolase, peroxisomal OS=Homo sapiens GN=ACAA1 PE=1 SV=2 - [THIK_HUMAN]	17062.5	12708.2	17489.7	19495.4	15377.2	11579.4	17191.5	18497.2	14368.5	15371.5	13247.8	15261.1	20093.9	20673.2	27520.5	26386.6	15528.6	20263.7	13202.6	11129.4	13876.9	11957.6	16814.8	13614.2	0.0490402	1	0.793228	0.999972	0.00346224	0.477368	-0.217539	0	0.100602	1.21244e-05
P07858	4	4	265.22	Cathepsin B OS=Homo sapiens GN=CTSB PE=1 SV=3 - [CATB_HUMAN]	47023.7	49079	37156.6	46166.8	37802.3	44100	56843.3	53688.6	40382.6	42186.9	32052.7	39262.8	48611.5	40649.7	54661.7	53759.8	37488.6	54031.6	53083.5	33293.9	48301.6	38616	34934.9	36253.1	1.96005e-13	1	0.999991	1	0.0169505	0.146218	-0.0961293	0	3.80402e-06	1.17186e-07
O75531	4	4	224.37	Barrier-to-autointegration factor OS=Homo sapiens GN=BANF1 PE=1 SV=1 - [BAF_HUMAN]	146475	191847	124698	64645.7	88423.1	120815	71337.8	112354	165292	37308.6	119180	153346	189491	161088	106188	55536.7	123002	134065	166513	161532	126009	108477	69384.6	141749	0.00414357	0.999996	1	1	-0.161594	0.0622018	0.0702326	1.83908e-06	0	1.09485e-12
O60287	4	4	261.66	Nucleolar pre-ribosomal-associated protein 1 OS=Homo sapiens GN=URB1 PE=1 SV=4 - [NPA1P_HUMAN]	12885.2	14066	14905.3	16235.2	10719.9	13646.2	14466.9	16377.1	15850.8	15117.5	12103.7	14192.8	14719.3	15112.3	16930.9	17349.7	9854.45	15729	13205.2	10142.3	13750.6	9164.54	11989.4	13067.1	0.279597	1	1	0.999384	0.0956313	0.121384	-0.209364	4.71498e-09	1.84528e-08	0.000267514
Q8NBN7	4	4	284.27	Retinol dehydrogenase 13 OS=Homo sapiens GN=RDH13 PE=1 SV=2 - [RDH13_HUMAN]	8347.69	6374.13	9198.8	9972.74	9183.88	5178.34	9057.85	11421.7	9189.3	10931.8	4538.52	7029.23	10412.6	12808.4	9656.84	17369.6	9081.3	9920.06	6983.81	3672.61	6088.04	4230.56	5865.52	4324.81	1.97232e-07	1	0.950143	0.79092	0.112478	0.521094	-0.630753	0	0.0222111	0.101867
Q8IX18	4	4	206.17	Probable ATP-dependent RNA helicase DHX40 OS=Homo sapiens GN=DHX40 PE=1 SV=2 - [DHX40_HUMAN]	13996.2	15718.7	14166.6	10187.8	8753.8	13679.6	22522.1	19953.1	15211.6	14580.6	14120.9	18494.1	10057.2	11136.9	13513.3	7516.02	9273.66	11983	12096.5	8937.71	13426.6	7464.19	13962.4	11382.5	1.3493e-05	0.629648	0.996094	0.999939	0.455191	-0.269204	-0.185548	0.200902	0.00169958	2.6372e-05
Q9GZS3	4	4	272.34	WD repeat-containing protein 61 OS=Homo sapiens GN=WDR61 PE=1 SV=1 - [WDR61_HUMAN]	45802.6	39638.8	52871.4	48004.4	46644.7	32417	55295.3	40489.6	43008.6	53518.1	44906	40137.3	55483.2	42953.5	59002.9	45202.7	45095.4	52384.8	42411.3	19227.4	31283.4	39424.3	39225	18953.6	0.000143683	1	1	0.950715	0.063679	0.177498	-0.478073	0	1.96718e-08	0.0219498
Q9UBU9	4	4	247.33	Nuclear RNA export factor 1 OS=Homo sapiens GN=NXF1 PE=1 SV=1 - [NXF1_HUMAN]	183859	58145.2	39493.2	44203.8	44652.8	45084.2	58846.4	121204	105565	61361.7	58332.3	61693.4	41130.2	45661.6	44722.6	131181	43612.4	48892.5	131329	49716.1	117947	54199.2	50177.4	56873.9	0.0347551	0.990125	1	0.999488	0.168796	-0.226001	0.14776	0.00430989	3.38702e-10	0.00022237
Q96TA1	4	4	152.11	Niban-like protein 1 OS=Homo sapiens GN=FAM129B PE=1 SV=3 - [NIBL1_HUMAN]	9825.99	12833.5	19490	11670.1	17295.5	7403.67	13495.8	9211.46	14672.5	11362.3	15208.6	8695.71	20709.1	13614.3	23321.1	14029.1	21795.7	12577.3	8151.56	4417.21	6378.18	7828.69	13158.8	4107.03	6.60532e-14	1	0.892166	0.0442821	-0.112147	0.433589	-0.834176	0	0.0495543	1.35377
P67870	4	4	279.18	Casein kinase II subunit beta OS=Homo sapiens GN=CSNK2B PE=1 SV=1 - [CSK2B_HUMAN]	114520	159253	99278.2	81383.6	92923.6	166238	157549	187477	112511	89806.7	75043.8	138364	104397	126169	103874	77985.9	73938.5	132351	143746	208851	154007	89200.9	120647	186771	4.40154e-08	1	0.999991	0.985023	0.0923171	-0.205835	0.339973	1.61255e-12	3.88209e-06	0.00655369
Q9H5V8	4	4	170.63	CUB domain-containing protein 1 OS=Homo sapiens GN=CDCP1 PE=1 SV=3 - [CDCP1_HUMAN]	43117.5	62137.7	41208.7	71486.2	15558.3	73486	29673.4	31004.7	45072.7	67072.2	60204.3	73008.1	49440.8	52550	34896.6	49835.6	48235.4	53670.7	48416.8	76838	66221.9	64730.9	50449.2	95407.6	4.14089e-09	1	1	0.424219	-0.00451427	-0.0889953	0.389214	1.02823e-11	6.94026e-13	0.37241
Q9UQE7	7	4	444.17	Structural maintenance of chromosomes protein 3 OS=Homo sapiens GN=SMC3 PE=1 SV=2 - [SMC3_HUMAN]	37069.2	33507.4	25132.8	40049.8	36791.6	38536.6	61101	69913.9	50577.5	67877.8	43527.1	52267.8	16882.4	17876.9	17486.9	22912.3	21646.4	20828.9	63344.2	77240.8	65463.4	52619.2	54868.2	68712.4	1.34472e-26	0.00166609	5.58471e-05	2.93645e-05	0.709864	-0.843537	0.856669	2.7783	4.253	4.53218
Q96S55	4	4	196.21	ATPase WRNIP1 OS=Homo sapiens GN=WRNIP1 PE=1 SV=2 - [WRIP1_HUMAN]	21882.3	20427.4	24458.7	29023.2	28766.8	26030.6	28485.4	23287.1	21076.9	26997.7	28781.9	31966.5	24690	23330.7	29141.4	21702.5	19172.8	24611.4	22937.3	15988.8	27558.5	17902.8	29838.5	25783	0.0235792	1	1	0.999998	0.0928155	-0.0781501	-0.105097	5.29978e-09	4.12204e-10	1.05048e-06
O43148	5	4	222.82	mRNA cap guanine-N7 methyltransferase OS=Homo sapiens GN=RNMT PE=1 SV=1 - [MCES_HUMAN]	33514.1	30706	30914.5	25692.5	23385.6	21174.3	35070.2	28851.1	22624.7	21698.3	21808.6	24797	30177.2	28823.7	33886.1	35011.2	21388.4	28445.5	30185.1	23997.4	29140.4	15067.2	31263	24334.4	0.304352	1	1	0.999999	-0.0949767	0.103858	-0.103033	1.05295e-08	3.08967e-08	3.54874e-07
P42126	5	5	350.93	Enoyl-CoA delta isomerase 1, mitochondrial OS=Homo sapiens GN=ECI1 PE=1 SV=1 - [ECI1_HUMAN]	100295	120905	105113	68135.7	61142.1	100762	102129	119533	92488.6	67716.1	75097.5	81895.8	96940	96321.2	106931	75716.1	110358	91000.2	112712	169844	101912	88781.8	74571.7	107030	0.041223	1	1	0.99926	-0.0460871	0.0532399	0.23517	0	1.09371e-10	0.00032137
Q14669	6	5	427.17	E3 ubiquitin-protein ligase TRIP12 OS=Homo sapiens GN=TRIP12 PE=1 SV=1 - [TRIPC_HUMAN]	29833.2	34525.7	23490.5	44640.5	35978	26859.4	33184.9	30785.3	24792	37839.4	25470.7	28419.8	36460.6	36125.9	32413.7	40540.4	28804.6	35252	23995.2	21524.2	27920.6	26377.5	34413.3	31734.2	2.31851e-05	1	0.999999	0.996974	-0.113958	0.101726	-0.235014	1.38947e-08	5.92332e-07	0.00131611
P62266	5	5	214.64	40S ribosomal protein S23 OS=Homo sapiens GN=RPS23 PE=1 SV=3 - [RS23_HUMAN]	627730	520959	676150	153710	142335	179299	321011	357335	553816	440478	334655	248867	636934	447240	385757	282347	338040	201418	457715	404414	351179	314957	168963	201124	0.197026	1	1	1	-0.0278783	-0.00530741	-0.277001	2.02317e-07	4.02658e-08	0
Q05639	21	5	1323.27	Elongation factor 1-alpha 2 OS=Homo sapiens GN=EEF1A2 PE=1 SV=1 - [EF1A2_HUMAN]	248255	207315	261270	125072	151995	240898	172443	128668	168643	82657	89955.3	167709	350528	267305	339447	148634	217038	292701	117832	108158	136196	88136.1	127303	110815	3.00556e-08	0.483867	0.980665	0.0990687	-0.608158	0.387834	-0.842882	0.315274	0.00847919	1.00406
Q14257	5	5	414.39	Reticulocalbin-2 OS=Homo sapiens GN=RCN2 PE=1 SV=1 - [RCN2_HUMAN]	63784	85512.8	65412.2	56110.4	59481.6	68500.2	90637.7	77079.3	65993.3	47350.4	47930.7	80951.2	72688.9	69151.6	69538.8	45226.6	35723.6	76461.9	76754	58721.8	46468.9	38035.1	57159.9	52711.6	0.00284016	1	1	0.999291	0.0397519	-0.112865	-0.273853	0	2.55367e-08	0.000308
Q9Y3D9	5	5	253.06	28S ribosomal protein S23, mitochondrial OS=Homo sapiens GN=MRPS23 PE=1 SV=2 - [RT23_HUMAN]	59234.5	68272.8	55740.5	58201.3	42674.1	76403.1	60916.6	67928.6	52972.1	62366.6	53904.6	77925	61111.2	77946.8	50793.2	63552.5	46769.4	68060.9	79708.2	79930.6	74550.9	65459.7	56178.7	84617.7	5.65546e-06	1	1	0.502593	0.0606801	0.030519	0.28886	2.12693e-08	0	0.298784
P84098	6	5	312.07	60S ribosomal protein L19 OS=Homo sapiens GN=RPL19 PE=1 SV=1 - [RL19_HUMAN]	295626	272411	210611	207380	150708	323376	372465	296614	279043	224269	237141	321199	244189	289744	152549	232194	218928	261307	383988	428421	351898	329689	288590	383851	5.90393e-10	0.999401	1	0.464829	0.245303	-0.0617741	0.569245	0.000260237	0	0.332707
P28070	6	5	357.5	Proteasome subunit beta type-4 OS=Homo sapiens GN=PSMB4 PE=1 SV=4 - [PSB4_HUMAN]	30931.7	19994.1	35167.2	12601.3	18977.4	2442.9	21742.4	14525.9	25207.4	11272.3	17145	11298.4	25704.3	18520.2	30795.4	12961.8	21277	4582.66	22051.5	5935.6	9411.34	11017.1	12433.6	1154.72	0.0405255	1	1	0.999094	-0.247325	-0.0773885	-0.953982	0	0	0.000393834
O14828	5	5	325.1	Secretory carrier-associated membrane protein 3 OS=Homo sapiens GN=SCAMP3 PE=1 SV=3 - [SCAM3_HUMAN]	48521	30642.3	23075.8	42414.5	31936.2	43835.9	45819.8	48302.8	44523.4	62330.9	54933.3	60197.4	30559.3	36892.7	17298.7	48564.2	42862.8	41254.1	67034.9	100036	48667	98012.7	79446.2	83593.5	1.05611e-10	0.407394	1	6.94786e-05	0.520124	-0.0197298	1.11306	0.389985	0	4.15815
P21283	5	5	349.32	V-type proton ATPase subunit C 1 OS=Homo sapiens GN=ATP6V1C1 PE=1 SV=4 - [VATC1_HUMAN]	32708.6	39592.8	36103.8	27442.5	36359.6	39632.8	49747.3	44429.2	52598.7	32193	40698.5	53715.8	28165.1	28896.2	33878.9	24647.3	28088.7	38819.6	38571	54988.5	43126.6	38459.7	35406.6	52126.4	6.00031e-09	0.305476	0.951046	0.608292	0.367946	-0.215112	0.310326	0.515023	0.0217986	0.215888
Q9BWJ5	5	5	227.29	Splicing factor 3B subunit 5 OS=Homo sapiens GN=SF3B5 PE=1 SV=1 - [SF3B5_HUMAN]	29258.8	30972.7	37393.6	46660.1	46324.2	49147.3	38656.3	25544	36084.8	51603.9	52916.7	50963.9	40872.8	27111.7	27270	26418.4	43035.9	43494.6	22213.6	29959.7	30206.9	42805.7	43425.3	39477.2	0.0580462	1	0.999763	0.999714	0.0932738	-0.203577	-0.204374	2.09695e-11	0.00010275	0.000124311
P05455	6	5	367.49	Lupus La protein OS=Homo sapiens GN=SSB PE=1 SV=2 - [LA_HUMAN]	115173	110466	136983	70143.5	88546.3	82767.9	91701.3	83480.5	111570	44863.3	75911.2	71398.2	120346	103389	126498	67845.8	89283.3	85613.7	85938.4	61917.4	72174.2	55640.5	62269.7	52837.4	2.52527e-08	0.874155	1	0.0777796	-0.334939	-0.0267643	-0.62839	0.0584115	0	1.10913
P13073	5	5	246.34	Cytochrome c oxidase subunit 4 isoform 1, mitochondrial OS=Homo sapiens GN=COX4I1 PE=1 SV=1 - [COX41_HUMAN]	65192.9	66418.5	43640.2	77782	56171.8	77425.5	67242.8	99918.7	69005.3	76012.1	76647.9	91960.6	64322.8	89001.3	55184.6	73297.5	92254.3	73489	105801	190445	101739	130315	82798.4	114273	0.00277256	0.996069	0.999981	0.0385864	0.314442	0.21109	0.907764	0.00171063	8.29564e-06	1.41357
P83731	5	5	314.9	60S ribosomal protein L24 OS=Homo sapiens GN=RPL24 PE=1 SV=1 - [RL24_HUMAN]	438453	389611	324844	333393	245897	455517	475651	447987	424448	345515	379659	453815	364267	460616	259155	385935	371004	369229	478884	599494	487912	474907	307772	488733	2.12465e-09	0.998359	1	0.820807	0.208044	0.0147551	0.375299	0.000713149	0	0.0857591
P47914	5	5	175.07	60S ribosomal protein L29 OS=Homo sapiens GN=RPL29 PE=1 SV=2 - [RL29_HUMAN]	238887	198603	195343	208743	143987	246826	281249	226912	256517	254553	279957	276189	201982	254240	138619	262948	319635	208335	314826	423683	404165	462382	302664	343792	0.00411521	0.999848	1	0.568442	0.354241	0.169218	0.869437	6.6048e-05	3.02985e-11	0.245314
P51148	5	5	396.19	Ras-related protein Rab-5C OS=Homo sapiens GN=RAB5C PE=1 SV=2 - [RAB5C_HUMAN]	150713	169462	118390	178116	162667	171882	170087	206243	154845	185505	153080	191209	168950	194944	153810	177083	154214	187412	216619	269023	191673	206282	188938	212576	5.98555e-15	0.855494	0.974528	6.58401e-05	0.157517	0.123735	0.434027	0.067783	0.0112055	4.18151
P46776	6	5	341.12	60S ribosomal protein L27a OS=Homo sapiens GN=RPL27A PE=1 SV=2 - [RL27A_HUMAN]	793710	713351	533983	444897	322129	822735	920086	810984	777047	517791	493623	956105	702490	885513	424874	556982	535380	703472	945046	1.19494e+06	1.01301e+06	674564	460293	1.09993e+06	2.56018e-07	0.998292	1	0.751754	0.301803	0.0690133	0.569404	0.000742597	3.31975e-11	0.123924
Q12907	5	5	223.99	Vesicular integral-membrane protein VIP36 OS=Homo sapiens GN=LMAN2 PE=1 SV=1 - [LMAN2_HUMAN]	26201.4	25863	16460.3	60937.2	41792.9	29902.8	41205.8	29668.8	29635.7	64610.8	55483	39590	31814.9	37306.1	20210.8	56879.6	54787.2	29996.5	59457.4	57342.2	46601.6	74138.4	65840	60711.9	3.23569e-07	0.851296	0.999738	0.00248846	0.371262	0.199537	0.855975	0.0699195	0.00011397	2.60407
Q96RP9	5	5	270.54	Elongation factor G, mitochondrial OS=Homo sapiens GN=GFM1 PE=1 SV=2 - [EFGM_HUMAN]	50295.4	54534.3	60813.1	63031.3	51145.2	50289.7	40410.7	39770	32703	43048.9	38289.7	37862.5	47278.7	48387.2	58161	60541.7	44809.3	49867.2	32199.3	24338.2	30391.3	32357.1	28780.3	30073.4	1.26255e-15	0.00156422	0.999983	7.71952e-10	-0.508291	-0.0951256	-0.889935	2.8057	7.5656e-06	9.11241
Q14011	5	5	365.74	Cold-inducible RNA-binding protein OS=Homo sapiens GN=CIRBP PE=1 SV=1 - [CIRBP_HUMAN]	87416.3	85814.8	66783.7	52443.9	48224.8	60423.8	52819.3	63486.5	70575	51018.3	37909.4	57926.8	67003.7	73507.5	54943.8	39277.5	40594.1	55583.8	50326.4	43666.6	44601.2	27287.5	32794	38486.4	6.67249e-11	0.995858	0.988986	0.0134583	-0.265284	-0.277547	-0.758115	0.00180259	0.00481005	1.87101
Q9NX24	5	5	342.22	H/ACA ribonucleoprotein complex subunit 2 OS=Homo sapiens GN=NHP2 PE=1 SV=1 - [NHP2_HUMAN]	50864.4	45518.5	43827.4	76490.7	59823.4	42662.9	44787.1	57724.2	71729.6	109113	96197.3	94868.5	41836.9	50102.1	37664	69805.1	72204.6	44271.4	76691	93296.2	71873.6	107232	80095.4	111114	2.08625e-09	0.393093	1	0.0204783	0.571759	-0.0150092	0.759362	0.405504	0	1.68871
P48637	5	5	357.84	Glutathione synthetase OS=Homo sapiens GN=GSS PE=1 SV=1 - [GSHB_HUMAN]	31437.1	31164.8	35033.8	30377.9	37706.1	24079.2	24245.9	23111.6	25342.9	19235.6	23467.4	20758.8	31937.3	24688.3	37401.4	24091.4	36155.2	30616.8	24362.5	15075.9	19693.1	17461	29024.9	11046.4	5.99181e-09	0.461687	1	0.00775421	-0.479144	-0.0378012	-0.702113	0.335653	0	2.11046
P61353	6	5	218.88	60S ribosomal protein L27 OS=Homo sapiens GN=RPL27 PE=1 SV=2 - [RL27_HUMAN]	535462	428779	366206	208257	177811	498939	483997	455624	618187	279636	351350	666792	494843	673991	306237	389253	332438	477774	602560	844908	719322	504126	344538	723788	0.00014483	0.989068	0.999124	0.277566	0.366185	0.271687	0.755145	0.00477382	0.000380558	0.556633
Q969V3	5	5	404.95	Nicalin OS=Homo sapiens GN=NCLN PE=1 SV=2 - [NCLN_HUMAN]	48766.5	42873.3	33188.7	56369.3	44571.6	48155.4	54343	48588.9	44547.7	57087.5	53283.1	60047.7	42960.4	57275.5	38254.4	59835.7	53864.9	53604.8	62522	72427	47156.1	67452.7	69653.9	52837.6	9.128e-07	0.935203	0.998171	0.05713	0.214784	0.158788	0.441713	0.029094	0.000795113	1.24314
O00411	5	5	263.56	DNA-directed RNA polymerase, mitochondrial OS=Homo sapiens GN=POLRMT PE=1 SV=2 - [RPOM_HUMAN]	31346.1	36924.2	32198.5	32553.6	26183.5	40349	28818.6	30552.7	22715.4	39455.9	24695.8	28182.5	27494	25366.7	27049.7	27113.9	21736.9	26047.6	21618.6	20426.5	22446.6	20978.1	18053.6	24823.2	2.6751e-06	0.959216	0.220279	0.000116135	-0.194212	-0.366299	-0.636741	0.0180838	0.657026	3.93504
O43290	5	5	245.3	U4/U6.U5 tri-snRNP-associated protein 1 OS=Homo sapiens GN=SART1 PE=1 SV=1 - [SNUT1_HUMAN]	61549.8	60049.8	53177.3	89708.7	67267.7	68112.7	82653.6	80271.6	75943	106012	81919.2	80731.5	51208.4	53405.3	50113.8	77666.8	60694.4	56217.2	79882.3	63087.3	84632.4	72252.2	73873	75569.7	2.15387e-13	0.302464	0.984639	0.991381	0.343979	-0.195026	0.168152	0.519327	0.00672305	0.00375953
Q96PZ0	5	5	301.36	Pseudouridylate synthase 7 homolog OS=Homo sapiens GN=PUS7 PE=1 SV=2 - [PUS7_HUMAN]	49867.9	46188.7	29926.1	40075.2	52058.9	45719.6	45464.5	44163.8	32630	30294.3	31145.8	39457.8	46523.1	33651.2	44599	22902.3	26148.6	43457.5	35575.4	29686.4	26693.3	22950.9	34583.9	25953.3	2.16228e-11	0.990132	0.897349	0.0463473	-0.241589	-0.280077	-0.58864	0.00430705	0.0470385	1.33398
P62841	5	5	138.87	40S ribosomal protein S15 OS=Homo sapiens GN=RPS15 PE=1 SV=2 - [RS15_HUMAN]	51758.9	37605.3	35201.4	45853.5	33927.9	42254.4	44409.5	43397.2	49707.1	47790.9	55104.1	45087.3	45041.1	57801.8	32913.7	68432.5	61962.1	39973.5	48372.7	67626.5	69242.3	90071.3	42312.6	53604	2.27793e-05	0.999995	0.999854	0.823862	0.211291	0.311939	0.59013	2.35919e-06	6.33207e-05	0.0841455
Q9UEW8	6	5	305.54	STE20/SPS1-related proline-alanine-rich protein kinase OS=Homo sapiens GN=STK39 PE=1 SV=3 - [STK39_HUMAN]	68676.4	83448	71049.7	41996.7	52446.6	71584.2	41293	43837.6	39446	34488.2	39998	57949.5	57558.4	60483.8	58615.6	38487.5	43168.3	69476.3	33510.1	38081.7	26605.2	42275.3	23005.3	38485.5	1.03454e-13	0.242597	0.998826	0.000838903	-0.59868	-0.247747	-0.946427	0.615115	0.000510296	3.07629
P53350	6	5	343.24	Serine/threonine-protein kinase PLK1 OS=Homo sapiens GN=PLK1 PE=1 SV=1 - [PLK1_HUMAN]	27917.6	36519.1	27069.1	23435.8	24090.9	32864.4	45407.2	59182.5	30252.8	36919.8	24139.9	41893.1	23943.2	29048.9	24960.5	19779.1	14658.8	29860.7	36180.5	24174.9	37814.6	28866.9	31203.1	41311.8	3.29825e-29	0.776173	0.989701	0.999812	0.468178	-0.273102	0.215221	0.110041	0.00449614	8.17505e-05
Q05519	5	5	233.72	Serine/arginine-rich splicing factor 11 OS=Homo sapiens GN=SRSF11 PE=1 SV=1 - [SRS11_HUMAN]	107349	152110	101175	119865	112847	154660	155304	166559	140431	190726	147939	166669	134618	112524	110885	156455	125335	147627	155103	176653	173673	165055	173221	206198	2.22745e-15	0.0855503	0.999999	0.00301184	0.371402	0.0741266	0.489134	1.06778	3.54494e-07	2.52117
Q96PD2	5	5	262.76	Discoidin, CUB and LCCL domain-containing protein 2 OS=Homo sapiens GN=DCBLD2 PE=1 SV=1 - [DCBD2_HUMAN]	73406.7	79234.5	65310.8	93269.7	77386.6	82819.7	50342.6	39056.8	38214.1	47990.2	33709.7	40787	61261.1	52518.7	51219.7	61323.2	45040.2	57642.9	19229.4	20395.7	32686.1	18746.1	44859.5	31264.1	4.22264e-32	1.81784e-06	0.0583517	4.3549e-10	-0.91453	-0.518924	-1.49563	5.74044	1.23395	9.36102
Q13428	5	5	341.82	Treacle protein OS=Homo sapiens GN=TCOF1 PE=1 SV=3 - [TCOF_HUMAN]	36556.1	35918.3	24652.6	31317.2	31422.7	44318.8	65068.4	65547.2	54755.8	72315.4	51606.2	68529.9	37913.8	42872.6	30355.2	45640	28537.5	44186.3	67403.1	86487.3	74187.6	57584	53268.1	86038.9	1.06433e-17	2.39031e-06	0.99942	1.85934e-08	0.887828	0.168646	1.05748	5.62155	0.000251782	7.73064
Q13247	7	5	364.79	Serine/arginine-rich splicing factor 6 OS=Homo sapiens GN=SRSF6 PE=1 SV=2 - [SRSF6_HUMAN]	87394.9	74077.2	75462.2	133278	113175	117843	122206	118120	117458	187280	150360	136216	110195	103819	55630.2	172638	143536	100239	143249	159298	135529	197319	164067	147162	1.83625e-06	0.41499	0.999997	0.0307796	0.468041	0.190409	0.654872	0.381962	1.37767e-06	1.51174
P15924	6	5	235.99	Desmoplakin OS=Homo sapiens GN=DSP PE=1 SV=3 - [DESP_HUMAN]	40717.5	36349.7	37965.5	31045.8	34387.6	44231.9	21787.1	19857.7	23314.9	20751	17948.2	25805.4	38037.1	39938	42887.5	35616.1	38712.3	47671.7	19009.1	31511.9	19641.9	21776.8	22552.8	26229.8	2.96146e-22	5.13633e-06	0.999988	0.000159164	-0.795433	0.112154	-0.675136	5.28935	5.37615e-06	3.79816
Q08752	9	5	482.11	Peptidyl-prolyl cis-trans isomerase D OS=Homo sapiens GN=PPID PE=1 SV=3 - [PPID_HUMAN]	39901.1	42681.9	48602.3	50468.8	53924.2	40197.8	25092.3	25506.5	29313.2	34376	38805.4	27210.7	39045.7	22680.9	40245.3	38576.8	45005.5	37607.2	25466.8	16655.1	21995.2	29425.3	35976.1	18833.5	1.52963e-07	0.0728343	0.932876	0.000177132	-0.613064	-0.30541	-0.894473	1.13766	0.0301762	3.7517
O14617	5	5	215.61	AP-3 complex subunit delta-1 OS=Homo sapiens GN=AP3D1 PE=1 SV=1 - [AP3D1_HUMAN]	19567.6	23687.7	16645.7	16257.2	17640.3	27079.4	15186.7	20172.4	12051.4	15283.4	13147	16045.7	16823	26322.9	20164	10307.1	11831.4	30725.7	13755.9	16184.4	14695.3	13415.2	14782.7	16699	0.0957443	0.963015	1	0.939731	-0.395622	-0.0572618	-0.433066	0.0163668	2.46112e-08	0.0269964
P35268	5	5	332.12	60S ribosomal protein L22 OS=Homo sapiens GN=RPL22 PE=1 SV=2 - [RL22_HUMAN]	265243	195386	190088	196913	139398	209088	325042	240503	289270	210515	297850	293568	270682	300254	149995	303540	269699	210818	330318	392207	312441	372292	252158	359621	5.47623e-06	0.781926	0.993949	0.0798443	0.469998	0.331395	0.75531	0.106834	0.00263571	1.09776
P68036	7	5	317.47	Ubiquitin-conjugating enzyme E2 L3 OS=Homo sapiens GN=UBE2L3 PE=1 SV=1 - [UB2L3_HUMAN]	251658	275176	249596	160553	176880	262013	186835	195113	160072	102989	118086	158554	251531	237791	246089	114665	159702	241348	171552	172506	137496	103975	174000	132944	0.000310044	0.408883	0.999999	0.311365	-0.578061	-0.137125	-0.62447	0.388401	5.78929e-07	0.50673
Q71RC2	6	5	296.23	La-related protein 4 OS=Homo sapiens GN=LARP4 PE=1 SV=3 - [LARP4_HUMAN]	47798.5	64461.4	42693.1	59675.7	62072.1	59041.1	28980.8	42854.4	26877.7	35304.9	29691.6	32071.4	35886.7	46810	41067	55070.8	42923.8	47123.3	21197.1	32851.6	34566.4	27139.1	25326.8	31718.3	1.0549e-23	3.60586e-06	0.5454	5.68306e-09	-0.778113	-0.320382	-0.958256	5.44299	0.263285	8.24542
P62979	9	5	328.63	Ubiquitin-40S ribosomal protein S27a OS=Homo sapiens GN=RPS27A PE=1 SV=2 - [RS27A_HUMAN]	224638	181666	178354	154639	108173	207481	213332	158208	268671	144390	213457	234940	227822	242592	163330	250132	285804	212830	218920	285061	300379	300079	170325	251381	0.0162213	0.999987	0.983703	0.826536	0.224996	0.390113	0.532717	5.70117e-06	0.00713601	0.0827383
Q13242	7	5	269.92	Serine/arginine-rich splicing factor 9 OS=Homo sapiens GN=SRSF9 PE=1 SV=1 - [SRSF9_HUMAN]	115134	137432	80626.4	163963	103130	116926	170479	191258	180053	349530	236485	208629	149483	163545	103440	218531	177266	136747	239890	329720	209881	309768	220745	254495	6.04128e-10	0.00394491	0.870827	3.02143e-05	0.897917	0.404026	1.12523	2.40396	0.0600681	4.51979
Q8WYP5	5	5	277.9	Protein ELYS OS=Homo sapiens GN=AHCTF1 PE=1 SV=3 - [ELYS_HUMAN]	22933.8	24005.4	20011.2	24258.9	22667.2	35630.1	43635	55127.9	31570.5	46490.7	24808.8	42530.1	19857.3	32768.4	22129	26385.3	11959.5	33868.9	33115.2	42695	39735.5	28600.7	40684.3	39725.9	9.08351e-08	0.0566746	1	0.179072	0.707636	-0.0247021	0.586871	1.24661	6.42812e-11	0.746973
O15427	6	5	270.24	Monocarboxylate transporter 4 OS=Homo sapiens GN=SLC16A3 PE=1 SV=1 - [MOT4_HUMAN]	21639.6	25124.3	15460.6	27718.5	20325.8	14549.2	29444	30910.5	27105.5	38031.2	34032.2	29158.1	25193.1	42327.6	15479.9	45063	30902.2	20197	34904.9	69289.7	30092.3	45390.7	34222.4	25648.9	0.00239629	0.698374	0.967946	0.119706	0.596126	0.521445	0.940493	0.155912	0.0141488	0.921882
Q16401	5	5	352.56	26S proteasome non-ATPase regulatory subunit 5 OS=Homo sapiens GN=PSMD5 PE=1 SV=3 - [PSMD5_HUMAN]	68106.2	71882.6	73200.9	72787.5	89711.2	93521.5	56271.2	49760.7	46993.8	37957.5	49444.8	53718.7	75657.9	63479	72019.8	71039.3	72675.6	85687.7	54656.2	44272.6	48368.5	48679.5	63993.2	43025.9	8.4374e-05	0.0211117	1	0.042737	-0.673698	-0.0908976	-0.630935	1.67548	8.77746e-10	1.3692
Q9P015	5	5	181.74	39S ribosomal protein L15, mitochondrial OS=Homo sapiens GN=MRPL15 PE=1 SV=1 - [RM15_HUMAN]	33451.9	28605.7	31270.6	30641.6	26415.3	32670.5	34469.3	29342.3	36843.9	29720.9	32679.4	33983.6	29167.4	37900.2	34780.4	46799.5	35146.8	34409.8	35164.2	47242.2	37925.9	41385.8	26600.2	35886.9	1.19399e-07	0.999999	0.959587	0.889215	0.106203	0.253396	0.292538	5.32414e-07	0.0179158	0.0509932
P63220	5	5	269.16	40S ribosomal protein S21 OS=Homo sapiens GN=RPS21 PE=1 SV=1 - [RS21_HUMAN]	201452	156752	169999	224637	155821	191003	202634	165989	224038	212908	280342	213061	216055	221135	157146	285065	316156	202978	247275	239177	284222	300507	234726	218614	0.000100934	0.999742	0.98955	0.754402	0.240309	0.346855	0.471294	0.000112269	0.00456241	0.122397
P56182	5	5	340.47	Ribosomal RNA processing protein 1 homolog A OS=Homo sapiens GN=RRP1 PE=1 SV=1 - [RRP1_HUMAN]	36746.2	44281.7	24864.2	71696.3	48790.4	43462.6	45766	43299.1	70693.3	86902.4	109834	101162	66979.2	70645.4	41437.4	79064	89506.5	74471.4	84751.3	118325	92129.5	128739	52440.3	110326	0.00612736	0.574573	0.725434	0.0326867	0.762154	0.645487	1.12054	0.240655	0.139402	1.48563
O75489	5	5	324.08	NADH dehydrogenase [ubiquinone] iron-sulfur protein 3, mitochondrial OS=Homo sapiens GN=NDUFS3 PE=1 SV=1 - [NDUS3_HUMAN]	35059.7	36633.3	28086.5	40504.9	42709.8	33793.2	44181	46705.4	53731.2	38012.8	55154.8	64882.4	49484.4	57078.8	36381.7	49143.9	52170.7	48112.3	53634.2	77760.7	48598.3	68699.8	43099.7	63550.2	6.88827e-09	0.575858	0.728485	0.048921	0.481453	0.431523	0.71293	0.239685	0.137579	1.3105
P30419	5	5	142.12	Glycylpeptide N-tetradecanoyltransferase 1 OS=Homo sapiens GN=NMT1 PE=1 SV=2 - [NMT1_HUMAN]	43071	27587.8	40296.4	38255.2	41313	57316.3	32808.9	31188.6	35559.7	42945.1	53471	52501.2	47173.3	34031.5	32299.1	16200.4	51490.1	48547.5	19146.6	22997.2	26276.9	55345.3	46118.3	64228.2	0.00113622	1	0.999998	0.999988	0.0036894	-0.109393	-0.0822056	0	7.74238e-07	5.30845e-06
Q99615	5	5	292.86	DnaJ homolog subfamily C member 7 OS=Homo sapiens GN=DNAJC7 PE=1 SV=2 - [DNJC7_HUMAN]	45636.6	43426.8	46505.1	41950.7	37407.1	38895.3	31596.4	36744.4	33867.4	17083.1	23109.4	23795.7	39267.2	30660.8	33048.5	44237.8	24259	25537	28900.7	27531.9	33139.1	21212.5	26930	12817.2	0.00011598	0.0294479	0.70032	0.00135731	-0.610925	-0.365543	-0.753748	1.53095	0.154703	2.86732
Q9NQW7	5	5	236.12	Xaa-Pro aminopeptidase 1 OS=Homo sapiens GN=XPNPEP1 PE=1 SV=3 - [XPP1_HUMAN]	63959.3	74614.1	66868.4	58640.6	82958.2	98019.9	39792.3	34654.5	31387.4	24580.1	28655.7	36773.8	48023.5	48580.3	60527	37626.9	56054.3	75708.6	27130	31281.1	27818.4	22915.3	39003.1	40636.1	8.18236e-25	5.4406e-09	0.253513	1.15104e-09	-1.1843	-0.446828	-1.23727	8.26435	0.595999	8.93891
O43252	6	5	409.3	Bifunctional 3'-phosphoadenosine 5'-phosphosulfate synthase 1 OS=Homo sapiens GN=PAPSS1 PE=1 SV=2 - [PAPS1_HUMAN]	86427.7	87916.8	99377.7	60378.9	86830.5	94940	54934.1	67615.2	65223.2	43991.4	53836.4	63507.1	68588.5	75644.1	85583.6	57798.9	70611.1	84730.7	57249.2	52460	49297.2	52758.4	72816	57484	1.64823e-11	6.93793e-05	0.820239	2.4166e-05	-0.563341	-0.219846	-0.592743	4.15877	0.0860593	4.61679
Q10570	6	5	367.22	Cleavage and polyadenylation specificity factor subunit 1 OS=Homo sapiens GN=CPSF1 PE=1 SV=2 - [CPSF1_HUMAN]	26140.4	28342.8	24523.6	39225.1	31451.4	37367.5	41058.5	41717.6	35917.8	53406.3	41423	47624.7	30534.5	37087.4	31764.1	42634	32306.6	35600.3	39196.6	42702.1	41954.5	48681.9	38958.8	51119.6	1.30196e-11	0.281284	0.999837	0.244455	0.481436	0.166456	0.489511	0.550855	7.06533e-05	0.611801
Q12874	5	5	408.43	Splicing factor 3A subunit 3 OS=Homo sapiens GN=SF3A3 PE=1 SV=1 - [SF3A3_HUMAN]	56736.4	57323.7	41930.7	64225.9	54463.6	71935.4	79156.7	83506.9	76706.2	102902	79551.6	94987.7	74773.8	70388.2	47806.5	73415.3	49753.1	77180.7	77190.5	88202.3	77099.3	75132.6	76804.8	121130	2.87086e-13	0.00760752	0.998574	0.0115205	0.5763	0.182357	0.572802	2.11876	0.000619871	1.93853
Q9NV06	5	5	403.01	DDB1- and CUL4-associated factor 13 OS=Homo sapiens GN=DCAF13 PE=1 SV=2 - [DCA13_HUMAN]	19071.5	27054.9	14359.7	30778.4	24271.1	19828.6	21888	13863.2	42224.2	38881.1	49679.9	58165.2	24421.4	20465.6	9563.06	14441.4	38052.8	23961.4	41407.4	28706.1	23527.8	41613.2	15215.3	42570.6	4.95911e-09	0.901159	1	0.993169	0.731164	-0.0483179	0.512056	0.0451988	4.46989e-11	0.00297675
P39687	12	5	634.14	Acidic leucine-rich nuclear phosphoprotein 32 family member A OS=Homo sapiens GN=ANP32A PE=1 SV=1 - [AN32A_HUMAN]	427478	473995	500459	583810	679487	425289	290559	304787	282318	315358	395287	295525	296957	310202	374583	381427	415867	376027	249622	219197	272837	285710	448030	189415	1.72788e-06	0.0123639	0.25709	9.82627e-05	-0.714178	-0.520119	-0.892491	1.90785	0.589915	4.00761
Q9Y6E0	7	5	335.8	Serine/threonine-protein kinase 24 OS=Homo sapiens GN=STK24 PE=1 SV=1 - [STK24_HUMAN]	25371.5	31879.6	25161.5	25819.2	25092.5	31729.5	21238.6	23401	18662.6	20766.5	15832.2	20486.8	22596	23546.9	21133.1	21827	21653	24317	18259.5	17378.4	19889.8	18850.9	18351.7	20959.2	2.4029e-18	0.00245159	0.340404	0.000141409	-0.45525	-0.289198	-0.537839	2.61055	0.468005	3.84952
P84103	7	5	404.72	Serine/arginine-rich splicing factor 3 OS=Homo sapiens GN=SRSF3 PE=1 SV=1 - [SRSF3_HUMAN]	253252	151214	196369	400032	276189	232689	289042	189483	528775	794988	745997	562339	369992	262210	191229	686024	665284	319648	510100	427132	545002	985221	602832	577830	0.00311817	0.382428	0.92678	0.0342209	1.0429	0.72438	1.27285	0.41745	0.0330233	1.46571
P62316	5	5	381.42	Small nuclear ribonucleoprotein Sm D2 OS=Homo sapiens GN=SNRPD2 PE=1 SV=1 - [SMD2_HUMAN]	178536	185714	127650	120309	116082	190440	221919	237921	247838	214180	164004	324202	247743	250997	175322	140201	133971	261471	257035	355901	256794	151371	153023	337749	4.25133e-05	0.516225	0.986311	0.373829	0.618048	0.396941	0.718624	0.287161	0.00598627	0.427327
Q9UHB6	5	5	217.61	LIM domain and actin-binding protein 1 OS=Homo sapiens GN=LIMA1 PE=1 SV=1 - [LIMA1_HUMAN]	58922.5	76310.6	43577.8	82305.4	58801.5	67364.4	62333.3	62659.4	52557	48418.4	41608.4	58098.8	109295	106131	72904.5	102731	58129.1	114842	80773.2	87624.7	73964.3	49518.4	74047.6	80773.4	5.3108e-08	0.992908	0.130266	0.997643	-0.249951	0.542393	0.205926	0.00309084	0.88517	0.00102463
Q9Y3E5	5	5	416.28	Peptidyl-tRNA hydrolase 2, mitochondrial OS=Homo sapiens GN=PTRH2 PE=1 SV=1 - [PTH2_HUMAN]	40733	24080.1	18692.2	54092.2	40137.5	24464.8	63594.9	62876	53723.4	89221.4	61045.5	70499.3	63916.6	77021.9	45536.2	118386	79210.6	64852.2	80298.6	128864	80650.6	105246	75319.4	95782.7	2.26329e-13	1.30592e-05	7.22899e-07	4.95813e-10	0.987677	1.15069	1.48543	4.88408	6.14092	9.30468
P18858	5	5	221.73	DNA ligase 1 OS=Homo sapiens GN=LIG1 PE=1 SV=1 - [DNLI1_HUMAN]	26716.1	27948.2	23116.5	38317.3	37591.3	37995.7	34460.5	46652.4	26744.3	29477.7	33809	35403	24690.8	25811.9	26304.1	25142.5	25693.3	26811.2	26945.5	27101.9	27671	23441.1	35382.6	33231	3.5743e-10	0.999995	0.846115	0.999978	0.107732	-0.311563	-0.141533	2.00961e-06	0.0725704	9.70639e-06
P14550	5	5	241.85	Alcohol dehydrogenase [NADP(+)] OS=Homo sapiens GN=AKR1A1 PE=1 SV=3 - [AK1A1_HUMAN]	60811	63113	47405.8	52752.6	72519	67005.4	31647.8	36421.3	30738.4	30621.9	33673.9	31774.1	52033.5	48811.8	46294.9	33241.3	44786.5	60179.6	28894.7	38298.2	30359	28057.9	41145.8	33163.3	3.09275e-26	1.76534e-08	0.25381	4.44722e-08	-0.899812	-0.349658	-0.862963	7.75317	0.595492	7.35191
P52306	5	5	284	Rap1 GTPase-GDP dissociation stimulator 1 OS=Homo sapiens GN=RAP1GDS1 PE=1 SV=3 - [GDS1_HUMAN]	19434.5	22994.7	19065.2	11265.1	16942.3	19638.2	12011.8	14206.2	11139	8450.64	7436.24	10519.4	16628.9	17765.2	17855.5	11236.6	12685.4	16075.4	12424.3	11476.4	12536.9	8980.04	8670.29	12975.3	2.15668e-20	0.000120671	0.97976	0.00123752	-0.778025	-0.245249	-0.705229	3.9184	0.00888013	2.90745
P52788	5	5	353.32	Spermine synthase OS=Homo sapiens GN=SMS PE=1 SV=2 - [SPSY_HUMAN]	81078	89468.2	78350.4	54713.2	74102	70194.4	51323.4	51321.4	43221.6	32544.7	38417.1	36527.8	67935.4	59170.9	69792	43626.1	49089.2	62671.2	50249.4	47772.9	43015.8	36766.7	47188.2	31705.4	1.13109e-14	5.98771e-06	0.505202	1.16758e-05	-0.822031	-0.346455	-0.803122	5.22274	0.296535	4.93271
Q14192	5	5	320.49	Four and a half LIM domains protein 2 OS=Homo sapiens GN=FHL2 PE=1 SV=3 - [FHL2_HUMAN]	38922.8	48712.5	26597.1	26804.2	37136.1	48382.5	72545.6	82352.8	46353.1	53775.4	53557	67457.8	62006.1	60900.7	53957.1	61958.2	48101.1	83007.1	77385.1	84396.1	74820.9	55165.2	74479.6	82815	6.67439e-12	0.0396414	0.0496529	0.000367008	0.73103	0.707391	0.987052	1.40185	1.30406	3.43532
Q96GQ7	5	5	246.36	Probable ATP-dependent RNA helicase DDX27 OS=Homo sapiens GN=DDX27 PE=1 SV=2 - [DDX27_HUMAN]	34642.4	50771.4	33210	65378.1	54226	33831.2	78686.4	74429.6	89589.8	110193	71653.2	71621.7	77759.3	56426.3	53161.8	117112	55631.8	42139.3	92369.4	87680.1	87322.4	95529.8	79253.6	88056.9	5.72751e-12	8.50555e-05	0.150583	5.06784e-06	0.866925	0.564104	0.962651	4.0703	0.822225	5.29518
O95602	7	5	258.15	DNA-directed RNA polymerase I subunit RPA1 OS=Homo sapiens GN=POLR1A PE=1 SV=2 - [RPA1_HUMAN]	29536.2	23226.2	14491.8	18044.4	22946.9	26443.8	43889	49405.3	40997.9	40028.5	31374.1	45292.2	31898.6	29180.5	24148.5	27760.2	17991.8	29616.5	43951	39572.6	45103.4	21650.8	32292.9	47203	1.15361e-06	0.000354208	0.99137	0.00888694	0.897979	0.253803	0.770581	3.45074	0.00376426	2.05125
Q9P0J1	5	5	337.61	[Pyruvate dehydrogenase [acetyl-transferring]]-phosphatase 1, mitochondrial OS=Homo sapiens GN=PDP1 PE=1 SV=3 - [PDP1_HUMAN]	70492.7	73958	64863.3	115008	102856	71684.6	38786.3	33027.9	28618.3	53889	44245.7	30422.5	47102.6	41937	58677.4	67451.7	69731.9	50786.9	27089.4	36243.2	30849.2	47350.6	54109.9	33404.3	9.73741e-14	0.000964116	0.626026	0.000873247	-1.12336	-0.571523	-1.123	3.01587	0.203408	3.05886
P46108	5	5	274.66	Adapter molecule crk OS=Homo sapiens GN=CRK PE=1 SV=2 - [CRK_HUMAN]	38959.1	34051	38098.7	32460.1	42539.7	42546.5	30734.2	30805.2	25181.8	21068.5	28932.4	25731.9	30208.9	28821.2	32737.6	22308.9	28012.4	36213.3	26655.2	25908.6	24655.3	21126.2	32179.7	25467.1	3.16845e-07	0.408138	0.872459	0.2278	-0.493141	-0.358849	-0.5517	0.389192	0.0592549	0.642447
Q92597	5	5	222.22	Protein NDRG1 OS=Homo sapiens GN=NDRG1 PE=1 SV=1 - [NDRG1_HUMAN]	13787.2	21536.4	15610.6	27984.8	28239.4	16256.4	58789.4	41084.8	47394.2	34639.8	75103.7	54718.1	37778.4	30171.4	35226.3	38446.6	47537.7	36773.1	44022.1	23879	54956	61449.6	93611.8	52198.1	3.64158e-23	0.00213656	0.182642	0.00177282	1.33678	0.872382	1.41946	2.67028	0.738399	2.75134
P51114	6	5	310.73	Fragile X mental retardation syndrome-related protein 1 OS=Homo sapiens GN=FXR1 PE=1 SV=3 - [FXR1_HUMAN]	97952.9	132877	95179.7	114125	115445	168376	91357.7	86866.3	59869.6	77529.5	70874.9	79363.6	83053.8	103380	93501.4	78809.5	91767.9	115379	66443.8	74361.3	72507.1	87908.4	76346.9	89029.9	3.55028e-16	1.55411e-05	0.157398	2.12011e-05	-0.636	-0.355376	-0.633723	4.80852	0.803001	4.67364
Q99729	7	5	451.54	Heterogeneous nuclear ribonucleoprotein A/B OS=Homo sapiens GN=HNRNPAB PE=1 SV=2 - [ROAA_HUMAN]	55791.8	38774.1	44849.1	39420.3	36361	26913.8	67739.2	57413.6	152636	84260.7	139498	133325	123008	89748	51507.1	88676.8	120579	68886.3	144434	134172	128417	152403	77893.5	111450	0.000234222	0.0505777	0.191469	0.00350486	1.3908	1.16371	1.62886	1.29604	0.717902	2.45533
Q14CX7	5	5	229.35	N-alpha-acetyltransferase 25, NatB auxiliary subunit OS=Homo sapiens GN=NAA25 PE=1 SV=1 - [NAA25_HUMAN]	28016.4	43488.7	32121.7	40181.6	39757.6	47035.1	32083.8	31216.6	25191.8	18206.6	23711.1	29283.9	23338.5	31477	33278.1	27601.6	27524.1	35706.3	29866.1	31165.5	21655.8	20557.2	29783.3	23689.3	3.19828e-10	0.00641972	0.306737	0.00358057	-0.530091	-0.366039	-0.557235	2.19248	0.513234	2.44605
Q7L576	7	5	368.59	Cytoplasmic FMR1-interacting protein 1 OS=Homo sapiens GN=CYFIP1 PE=1 SV=1 - [CYFP1_HUMAN]	33443	30318	26765.3	25332.7	33000.8	40158.8	25689.4	30875	20310.3	22448.4	21113	24233.8	21279.6	25662.4	21696.8	22850.6	23161.7	27427.1	21860.5	20395.2	23682.9	21548.9	25525.3	21079.2	4.03736e-09	0.22364	0.164586	0.029115	-0.385764	-0.411842	-0.495304	0.65045	0.783607	1.53588
P49721	5	5	291.21	Proteasome subunit beta type-2 OS=Homo sapiens GN=PSMB2 PE=1 SV=1 - [PSB2_HUMAN]	218144	229446	188733	156489	165554	254660	253199	240137	187986	122609	148599	217127	193882	225083	201190	164205	150462	223313	206390	215318	226466	118543	168924	217182	0.0508614	1	1	1	-0.052525	-0.066808	-0.0734387	1.18371e-10	2.18709e-12	5.67814e-10
Q99614	5	5	315.87	Tetratricopeptide repeat protein 1 OS=Homo sapiens GN=TTC1 PE=1 SV=1 - [TTC1_HUMAN]	46020.6	57068.7	33880.5	16871.6	24922.8	60607.3	37013.8	35282.8	20718.9	11585	12611.9	30510.6	32109.8	34415.2	36928.7	11838.6	18072.6	46219.8	24218.3	32873.6	32040.6	9380.03	20664.4	30223.8	3.04371e-05	0.808141	0.998701	0.884855	-0.696356	-0.414585	-0.680063	0.0925129	0.000564646	0.0531279
P14923	7	5	271.94	Junction plakoglobin OS=Homo sapiens GN=JUP PE=1 SV=3 - [PLAK_HUMAN]	28075.4	31847.4	20573.2	32338.8	32847.8	23979.6	34392.5	38384.2	39657.1	60447	35917	35313.9	48305.7	50856	28646.9	72911.1	46320.4	38530	46332.1	46543.7	46268.4	55469.2	45842.7	46737	1.65038e-07	0.240048	0.0101704	0.00293699	0.524876	0.751181	0.759356	0.619702	1.99266	2.5321
Q8NEM2	5	5	316.02	SHC SH2 domain-binding protein 1 OS=Homo sapiens GN=SHCBP1 PE=1 SV=3 - [SHCBP_HUMAN]	9721.49	15459.8	15667.4	16366.1	18843.8	19014	56417.7	51293.6	33556.6	50705.4	39540.1	40992.8	20246.8	21474.4	32770.7	25949.4	20850.6	34281	40361.2	26551.2	43711.5	35949.5	40637	46761.1	1.65355e-18	1.78193e-09	0.0439406	2.51958e-07	1.51919	0.710489	1.29923	8.74911	1.35713	6.59867
Q13045	6	5	329.95	Protein flightless-1 homolog OS=Homo sapiens GN=FLII PE=1 SV=2 - [FLII_HUMAN]	74316	78719.5	65425.8	65345.5	67135.6	88977.9	75165	78993.2	67630.9	52344.8	57948.5	65567.5	68828.5	68647.3	69739.5	55195	56653.9	78411.4	66333.4	77012.9	57683.4	52336.4	71781	66106.4	0.0046917	0.999618	0.9997	0.998072	-0.145744	-0.146376	-0.169138	0.000166135	0.000130493	0.000838135
Q9Y4W6	5	5	207.96	AFG3-like protein 2 OS=Homo sapiens GN=AFG3L2 PE=1 SV=2 - [AFG32_HUMAN]	36320.3	33503.9	33008.2	50859.7	42149	31284.6	51368.1	50277.2	45996	60579.6	51222.5	45883.9	46050.6	49862.7	41890.3	65946.4	48108.3	39854.3	53698.3	57831.6	48315.2	55324.3	52310.2	40719.9	0.000750836	0.00286111	0.0404552	0.00192855	0.426865	0.361057	0.440374	2.54347	1.39303	2.71477
P19367	7	5	316.23	Hexokinase-1 OS=Homo sapiens GN=HK1 PE=1 SV=3 - [HXK1_HUMAN]	69471.1	78942	68882.8	99696.1	90490	98553.8	80452.6	81752.9	67599.1	94262.9	76008.4	94404.3	74418.8	84848.6	71572.5	84487.1	68137.7	90193.8	80694.4	94899.1	62308.6	77107.3	81257.6	85300.2	0.0118405	1	0.999975	0.999999	-0.0333263	-0.0953919	-0.0715019	0	1.10539e-05	2.26789e-07
Q15050	5	5	286.09	Ribosome biogenesis regulatory protein homolog OS=Homo sapiens GN=RRS1 PE=1 SV=2 - [RRS1_HUMAN]	20077.7	18743.2	25068.6	24188.4	17886.8	19643.5	45677.2	35192.2	84935.4	43053.2	51468	103271	68490.9	52489.7	18305.1	24612.5	42447.1	47982.8	62892	69450	48278.1	48396.6	31307	74629.7	0.000112611	0.0106344	0.50157	0.0194407	1.53341	1.01776	1.41503	1.97329	0.299669	1.71129
Q8TCS8	5	5	285.98	Polyribonucleotide nucleotidyltransferase 1, mitochondrial OS=Homo sapiens GN=PNPT1 PE=1 SV=2 - [PNPT1_HUMAN]	21062.7	25415.5	24731.7	23452	23878.7	30153.9	27702.3	26007.4	23999.7	21257	20264.4	22860.2	32020.4	24274.9	29259.3	33913.2	20941.9	28108.3	28403.7	29067.8	28355.3	25362.5	21803.8	22375.3	3.99725e-06	1	0.999553	1	-0.0655353	0.180552	0.0633439	1.12993e-10	0.000194107	5.00585e-11
Q9UBT2	7	5	306.93	SUMO-activating enzyme subunit 2 OS=Homo sapiens GN=UBA2 PE=1 SV=2 - [SAE2_HUMAN]	48693.6	67752	49763.1	27307.1	41590.2	60497.9	46959.2	50118	30418.7	17298.2	25728.1	31819.1	29838.4	38285.4	41496.8	21161.3	24212.3	45605.9	30405.7	40626.6	36006.9	15522.4	36322.8	37185.5	7.59645e-07	0.388228	0.456419	0.328483	-0.546874	-0.559342	-0.592296	0.410913	0.340636	0.483487
P33316	5	5	392.62	Deoxyuridine 5'-triphosphate nucleotidohydrolase, mitochondrial OS=Homo sapiens GN=DUT PE=1 SV=4 - [DUT_HUMAN]	201893	227231	187559	129004	154655	221589	129643	139732	112480	92144.4	97279.9	103106	132366	143143	130784	104184	97304.1	147287	121098	133764	123277	85638.8	119515	110377	2.45375e-11	0.000289581	0.0179045	0.000947151	-0.73434	-0.571305	-0.693665	3.53823	1.74704	3.02358
P55209	9	5	505.75	Nucleosome assembly protein 1-like 1 OS=Homo sapiens GN=NAP1L1 PE=1 SV=1 - [NP1L1_HUMAN]	339926	310807	308906	273534	318992	379091	228426	217339	204002	144248	166419	205876	267765	231873	233048	187288	188142	271542	212964	213877	198674	159860	234733	225353	2.57535e-24	5.54079e-08	0.00116924	4.40243e-06	-0.727587	-0.485229	-0.63286	7.25643	2.9321	5.35631
Q08380	5	5	196.07	Galectin-3-binding protein OS=Homo sapiens GN=LGALS3BP PE=1 SV=1 - [LG3BP_HUMAN]	39413.8	39613.7	37940.7	38955.5	33046.8	44777.9	12571.9	21229.2	14048.8	15246.1	15394.3	14703.8	48386.9	50508.8	50484	62275.4	37557.5	47675.3	25973.1	39684.5	25538.1	31006.3	18119.9	24264.8	5.0174e-26	4.35529e-10	0.494717	0.00912233	-1.32665	0.344962	-0.506109	9.36098	0.305643	2.03989
P38159	7	5	427.8	RNA-binding motif protein, X chromosome OS=Homo sapiens GN=RBMX PE=1 SV=3 - [RBMX_HUMAN]	1661.03	6770.79	6077.66	33356.3	22386.6	5982.9	5190.76	5959.69	23511.8	93615.8	101082	17471.5	10122.3	4865.78	5665.02	68476.1	88308.5	7967.66	13447.1	7440	21295.7	115688	47942.5	14909.7	0.974232	0.980653	0.999915	0.965339	1.69499	1.28215	1.5337	0.00848482	3.67767e-05	0.01532
A0FGR8	5	5	269.66	Extended synaptotagmin-2 OS=Homo sapiens GN=ESYT2 PE=1 SV=1 - [ESYT2_HUMAN]	25539.6	17415	19316.2	24439.9	19228.8	10613.1	35749.3	34389.8	27840.7	29638.7	22308.2	28776.6	26123.7	31019.2	25998.7	47554.2	27119.5	22800	30690.3	34394.2	31848.9	28261.9	26407.2	29932	1.76914e-06	0.0396075	0.048229	0.0220401	0.616586	0.63194	0.639263	1.40222	1.31669	1.65679
P30566	6	5	297.81	Adenylosuccinate lyase OS=Homo sapiens GN=ADSL PE=1 SV=2 - [PUR8_HUMAN]	186682	151259	129655	95104.5	120510	153500	85084.3	89754.5	82881.2	64659.4	70466	81663.8	97435	91242.2	101717	82397.7	77307.6	117677	78745.5	101754	94985.7	68786	89148.4	90456.4	6.48432e-11	1.07135e-05	0.0147608	0.000739842	-0.818293	-0.559405	-0.675504	4.97007	1.83089	3.13086
Q9ULV4	5	5	220.15	Coronin-1C OS=Homo sapiens GN=CORO1C PE=1 SV=1 - [COR1C_HUMAN]	70163.2	58328.2	76003.6	55409	49549.5	53987	54144.7	60110.4	120389	94571.6	110610	106807	119875	98554.9	73725.3	94944.8	96769.2	87714.6	124471	87162.5	94967.9	94254.4	79306.3	70150.7	0.0153335	0.594321	0.258366	0.431545	0.588853	0.653245	0.598531	0.225979	0.587764	0.364974
Q99471	5	5	325.53	Prefoldin subunit 5 OS=Homo sapiens GN=PFDN5 PE=1 SV=2 - [PFD5_HUMAN]	141856	143897	136093	91898.1	115252	127386	118162	122396	103839	74306.8	82577	86905.8	106054	97321.7	116628	65790.1	79640	99729.9	102300	116219	103517	68762.9	107822	86035.3	0.502907	0.921107	0.783917	0.91283	-0.362841	-0.420448	-0.371527	0.0356897	0.10573	0.0396102
P61758	5	5	240.22	Prefoldin subunit 3 OS=Homo sapiens GN=VBP1 PE=1 SV=3 - [PFD3_HUMAN]	86512.6	66676.3	64150.8	77565.3	96673.5	90984.3	57627.7	63096.3	50950.5	68886.6	75479.2	68156.4	53439.7	58150.2	58042.2	52020.8	65696.2	60534.2	51406.1	59457.1	54778.2	55989.5	80967.9	69476.2	2.21032e-08	0.259613	0.0085633	0.0844841	-0.328872	-0.472114	-0.375124	0.585674	2.06736	1.07323
P82650	5	5	249.53	28S ribosomal protein S22, mitochondrial OS=Homo sapiens GN=MRPS22 PE=1 SV=1 - [RT22_HUMAN]	45367.3	37119.5	38907.9	38010	31504.9	51122.1	43739.1	37035.9	46693.4	45766.7	52002.8	56038.1	52296.8	59798	46636.7	62485.1	52406.3	50903.6	44418	45430.1	45759.9	64835.5	45327.3	51960.6	8.21556e-07	0.968016	0.123237	0.700616	0.216791	0.423141	0.298816	0.0141173	0.909259	0.15452
Q9BVI4	5	5	224.08	Nucleolar complex protein 4 homolog OS=Homo sapiens GN=NOC4L PE=1 SV=1 - [NOC4L_HUMAN]	10714.2	10172.9	6567.12	11079.1	7269.6	3253.66	25931.7	22028.8	29959.8	34074.6	27817.6	24592	16396.2	17408.2	10906.8	21765.9	16721.4	6656.51	22854.7	25018.9	15798.3	23165	13022.8	13449.4	7.84695e-10	1.94711e-07	0.121316	0.00141526	1.74473	0.873152	1.20775	6.71061	0.916083	2.84916
O75347	6	5	291	Tubulin-specific chaperone A OS=Homo sapiens GN=TBCA PE=1 SV=3 - [TBCA_HUMAN]	69775.3	95139.9	70016.7	102459	106528	95010.8	45783.6	70355.8	40270.6	58358.1	64738.6	46426.7	55183.8	68218.2	59650.7	68261	74959.2	72212.6	47501.7	74253.5	55263.4	67345.8	75646.4	54709.7	4.57774e-06	0.0110608	0.645752	0.265499	-0.72552	-0.43557	-0.524283	1.95621	0.189934	0.575937
P46109	5	5	210.83	Crk-like protein OS=Homo sapiens GN=CRKL PE=1 SV=1 - [CRKL_HUMAN]	66375.4	75066.7	72042.7	48121.1	59285.9	75992.7	70739.5	60648.1	48948.9	26269.3	38042.8	59684.6	62703.3	53354.1	60324.8	27760.2	37592.1	59617.2	58214	63850.9	47806.9	29347.2	52217.5	61016.6	0.251956	0.890066	0.891116	0.973029	-0.383068	-0.397271	-0.34508	0.0505779	0.0500658	0.011874
Q9UGI8	5	5	179.62	Testin OS=Homo sapiens GN=TES PE=1 SV=1 - [TES_HUMAN]	20926.8	21801.2	27850.1	25746.8	43550.9	29781.5	14506.4	12364.1	10257.5	18118.2	20344.6	12533.5	8519.96	8106.26	15040.9	12598.7	19511.8	14831.3	10295.1	14824	14436.2	16839.3	24458	12334.8	4.82058e-06	0.00217026	5.39984e-05	0.00676699	-0.945012	-1.10986	-0.864417	2.66349	4.26762	2.1696
Q9UNQ2	5	5	258.5	Probable dimethyladenosine transferase OS=Homo sapiens GN=DIMT1 PE=1 SV=1 - [DIM1_HUMAN]	78580.9	57346.7	57198.1	88809.3	110497	78347.9	63573.6	56226.7	49792.7	79923.4	80007.2	69792.2	46750.4	40773.9	58959	71489.6	74788.1	59151.5	52962.9	54425.8	53617.2	67831.8	89276.5	71248.5	0.00318839	0.996051	0.496792	0.975515	-0.237522	-0.419836	-0.273938	0.0017186	0.303825	0.0107661
Q96C36	7	5	500.65	Pyrroline-5-carboxylate reductase 2 OS=Homo sapiens GN=PYCR2 PE=1 SV=1 - [P5CR2_HUMAN]	76049.5	69076.8	78164.8	103793	81903.1	74766.7	69303.2	77710.5	66301.6	102186	67077.2	59880	64598.7	58654	80786.5	96840.1	62038.1	60860.6	72154.8	68923.5	71519.1	87908.7	74661.1	66286.6	0.0207314	0.99992	0.991237	0.99998	-0.128731	-0.190964	-0.132011	3.46193e-05	0.0038227	8.71773e-06
Q15257	6	5	289.97	Serine/threonine-protein phosphatase 2A activator OS=Homo sapiens GN=PPP2R4 PE=1 SV=3 - [PTPA_HUMAN]	55798.3	72344.3	55910.8	60447.7	64265.3	87979.1	48039.8	40281.2	37809.1	33354.7	45827.4	47256	45908.3	38453.9	48768	34893	47797.8	57263.6	47050.6	43525.4	42314.7	40653.1	60686.2	49542.1	5.82474e-07	0.00134385	0.0196046	0.0723083	-0.65154	-0.538866	-0.483481	2.87165	1.70764	1.14081
Q9HC38	5	5	224.69	Glyoxalase domain-containing protein 4 OS=Homo sapiens GN=GLOD4 PE=1 SV=1 - [GLOD4_HUMAN]	268829	239441	164537	242143	260247	239116	194366	177832	102241	182280	201940	177678	212981	140016	169843	160529	185027	234892	195148	193986	160096	193082	226394	164968	0.0032949	0.0628214	0.369494	0.642949	-0.44861	-0.358292	-0.319098	1.20189	0.432393	0.191824
P04818	5	5	210.72	Thymidylate synthase OS=Homo sapiens GN=TYMS PE=1 SV=3 - [TYSY_HUMAN]	51347.2	63356.9	44958	39584.9	39781.6	61104.6	38658.4	45940.8	32827.5	31028.7	32071.7	41084.5	29264.1	38857.3	32669.6	21852	28486.4	36001.8	35496.4	36333.2	33202.2	39173	37869.9	40579.1	3.45964e-17	0.495367	0.0112888	0.577368	-0.437569	-0.681553	-0.4308	0.305073	1.94735	0.238548
P61981	8	5	573.02	14-3-3 protein gamma OS=Homo sapiens GN=YWHAG PE=1 SV=2 - [1433G_HUMAN]	612589	661886	515186	448716	550257	690924	442011	553264	312347	363348	333679	383367	512560	484580	452035	371280	395096	593023	440170	592622	420322	367612	501609	514215	2.40778e-14	0.00172483	0.475654	0.566014	-0.543091	-0.309067	-0.294767	2.76325	0.322709	0.247173
Q99575	5	5	332.79	Ribonucleases P/MRP protein subunit POP1 OS=Homo sapiens GN=POP1 PE=1 SV=2 - [POP1_HUMAN]	49439.9	49995.4	51008.1	63222.1	47130.7	75842.7	52627.3	56343.3	38301.2	60341.3	40954.2	52308.2	36953.2	52030.6	62661.2	71846.5	46111.3	58873.8	51050.6	47182.3	54946.5	56029.6	48249.5	63713.2	2.25115e-10	0.999431	1	1	-0.162034	-0.0354107	-0.0678568	0.000247155	1.49095e-12	1.73223e-11
P31949	5	5	320.16	Protein S100-A11 OS=Homo sapiens GN=S100A11 PE=1 SV=2 - [S10AB_HUMAN]	28571.7	37634.1	25998.8	43909.4	34555.1	19069.2	73073.7	59583.2	75853.6	79571.4	114330	62195.9	64963.8	51820.7	52009.7	90581.8	87923.6	99317.8	82797.5	45854.2	39060.5	76652.2	78416.1	23370.6	9.87432e-07	0.0181389	0.0354047	0.650282	1.292	1.23503	0.86739	1.74139	1.45094	0.186898
Q99426	5	5	255.08	Tubulin-folding cofactor B OS=Homo sapiens GN=TBCB PE=1 SV=2 - [TBCB_HUMAN]	53629.9	69627.5	44692.8	39863.2	49500.4	81350.5	37710.8	45831.1	23299.6	16135.4	21410.2	34881.3	39759.5	35034.4	33488.4	18298.4	23131.2	51558.1	38873.2	46513.6	33865.1	25325.2	35116.3	48848.3	4.47236e-08	0.000720275	0.0171909	0.34111	-0.917733	-0.750722	-0.567398	3.1425	1.7647	0.467105
Q96D46	5	5	254.41	60S ribosomal export protein NMD3 OS=Homo sapiens GN=NMD3 PE=1 SV=1 - [NMD3_HUMAN]	43357.8	38618.5	47087.2	52051.4	55901	67921.6	23741.9	34321	20336.8	34240.9	50582.7	35267.1	31764.7	34642.5	33107.2	47002.3	45952.3	47476.2	32407.6	42939.2	34731.1	47770.3	40809.2	45915.8	5.23296e-19	0.0225998	0.854172	0.935258	-0.619445	-0.345809	-0.318247	1.6459	0.0684546	0.0290687
Q7Z4W1	5	5	426.35	L-xylulose reductase OS=Homo sapiens GN=DCXR PE=1 SV=2 - [DCXR_HUMAN]	151452	217301	153680	227488	203494	224347	123645	167976	101791	153461	107402	122114	172575	197227	175175	237276	166580	216882	147113	209101	163190	175812	164246	164373	1.25724e-11	0.00121962	1	0.990195	-0.601199	-0.0148332	-0.202066	2.91378	0	0.00427945
Q92797	7	5	316.8	Symplekin OS=Homo sapiens GN=SYMPK PE=1 SV=2 - [SYMPK_HUMAN]	49109.5	60025.9	51974.7	48979.6	52632.1	58857.8	60570.7	80576.5	45287	54068.3	43964.2	50811	42255	49904.1	53445.2	42347.6	30195.5	54237.8	53960.6	67924.5	55295.8	31005.5	49776.3	51748.5	0.0118801	1	0.99982	1	0.060181	-0.239527	-0.0542523	0	7.80011e-05	3.19511e-12
Q07960	5	5	261.08	Rho GTPase-activating protein 1 OS=Homo sapiens GN=ARHGAP1 PE=1 SV=1 - [RHG01_HUMAN]	22997	23749.3	28800.4	15672.8	18571.2	43920.5	12150.1	20961.7	13944.1	13371.6	13543.5	18306.5	21397.9	17946.3	21719.5	14643.2	18311	39177.5	13929.8	23718	26363	11776	25597.9	25111	0.000297797	0.576631	0.999999	0.999952	-0.736175	-0.20668	-0.281136	0.239102	2.86718e-07	2.09898e-05
Q14978	5	5	338.28	Nucleolar and coiled-body phosphoprotein 1 OS=Homo sapiens GN=NOLC1 PE=1 SV=2 - [NOLC1_HUMAN]	24294.5	24150.4	17865	60591.5	42232.2	5254.21	38709.8	37169	62898	110489	69607.6	36630.7	45368	38603.4	25695.6	89449	58343.3	18374.3	51546.7	27439.2	28198.3	62426.9	62856.3	10159.7	0.0414492	0.653435	0.985042	0.999734	1.02757	0.661499	0.476443	0.184798	0.00654531	0.000115684
Q9Y6Y8	5	5	241.02	SEC23-interacting protein OS=Homo sapiens GN=SEC23IP PE=1 SV=1 - [S23IP_HUMAN]	66454.8	66929.9	58374.6	53607.2	62497.7	89659.1	35204.1	49113.1	34592.4	41906.8	43068.9	40190.2	56472.6	53869	46181.9	31029.3	51453.4	74859.8	44207.2	63090.2	43772.9	67883.9	53609.3	52743.3	6.1561e-05	0.00089317	0.506914	0.866227	-0.703712	-0.340891	-0.289238	3.04907	0.295066	0.0623683
Q15293	6	5	400.71	Reticulocalbin-1 OS=Homo sapiens GN=RCN1 PE=1 SV=1 - [RCN1_HUMAN]	180306	179493	153080	313392	285026	245581	154925	156385	105861	204534	180070	147107	123926	120661	138837	202932	170670	173284	147175	183870	153101	218857	234418	178068	0.000208456	0.234797	0.16555	0.986361	-0.51599	-0.544508	-0.282616	0.629307	0.781072	0.00596402
O43765	5	5	280.72	Small glutamine-rich tetratricopeptide repeat-containing protein alpha OS=Homo sapiens GN=SGTA PE=1 SV=1 - [SGTA_HUMAN]	203327	253752	180417	223705	229247	274273	157767	185556	114672	152509	129640	144494	151756	185886	158900	164839	166366	211395	159255	209377	188687	191734	202771	195814	2.37695e-10	0.0011802	0.267459	0.934364	-0.625449	-0.393214	-0.249939	2.92804	0.572743	0.0294838
Q9GZL7	5	5	248.62	Ribosome biogenesis protein WDR12 OS=Homo sapiens GN=WDR12 PE=1 SV=2 - [WDR12_HUMAN]	35380.5	51728.1	39986.4	74551.6	66234.7	73911.3	23140.1	19072.2	48332.2	27496.9	72378.9	75612.6	53756.2	38481.2	34054.7	40591.7	63875.5	55542.9	32098.6	42094.8	40045	63833	51797.9	79223.2	0.236085	0.936923	0.999995	1	-0.361516	-0.255582	-0.145082	0.028296	2.31118e-06	3.41699e-09
P15531	16	5	963.46	Nucleoside diphosphate kinase A OS=Homo sapiens GN=NME1 PE=1 SV=1 - [NDKA_HUMAN]	504378	626422	442772	237098	273327	581338	475509	520435	373125	213579	226844	415341	477298	479978	460349	199268	305523	473694	486911	597858	436006	186213	353284	434032	0.768672	1	1	1	-0.26062	-0.153623	-0.0956797	7.6031e-09	0	0
P36871	5	5	324.43	Phosphoglucomutase-1 OS=Homo sapiens GN=PGM1 PE=1 SV=3 - [PGM1_HUMAN]	90696.5	104432	61978.1	42154	64310.8	128294	60218.6	88647.9	37962.6	24462.2	22566.1	61644.1	77081.8	85361.5	69374.1	32827.6	47437	113888	68817.9	112612	75406.5	25386.2	56750.1	88009.8	0.0131341	0.712276	1	1	-0.735099	-0.207511	-0.204088	0.147352	2.79451e-08	1.15409e-07
P62993	5	5	267.81	Growth factor receptor-bound protein 2 OS=Homo sapiens GN=GRB2 PE=1 SV=1 - [GRB2_HUMAN]	110263	133932	88061.7	118120	114723	147684	91504.3	104103	54850.9	77115	74995.2	80221.3	86587.6	85036.6	67573.6	73763.3	82479.1	108072	94314.6	117872	82005.8	91584.5	126471	104133	3.16134e-11	0.00993381	0.0501832	0.989169	-0.56207	-0.501437	-0.20964	2.00288	1.29944	0.00472938
Q15369	5	5	372.88	Transcription elongation factor B polypeptide 1 OS=Homo sapiens GN=TCEB1 PE=1 SV=1 - [ELOC_HUMAN]	75760.5	70111.7	56321.9	65507.2	66761	69991	63018.7	84082.9	63209.7	53055.7	54670.8	57420.5	52699.6	46945.7	54290.7	62216.9	53123.1	61674.1	52586.1	81601.8	71613.1	67414.6	58291.1	53082.2	1.15046e-12	0.999955	0.660271	1	-0.10732	-0.28936	-0.0726557	1.96392e-05	0.180278	1.57067e-07
P19387	5	5	266.5	DNA-directed RNA polymerase II subunit RPB3 OS=Homo sapiens GN=POLR2C PE=1 SV=2 - [RPB3_HUMAN]	20149.2	27716.4	22770.3	14117.6	18210.6	29235.9	21283.5	18320	32234.6	15955.4	26358.4	38395.1	33427.3	25754.5	25912.8	13330.8	20930.9	36038.9	32588.1	17866.6	26945.4	15324.9	18469	27491.9	7.47886e-05	0.999995	0.99997	1	0.206532	0.23322	0.0690989	2.17447e-06	1.30804e-05	0
Q9H773	5	5	334.58	dCTP pyrophosphatase 1 OS=Homo sapiens GN=DCTPP1 PE=1 SV=1 - [DCTP1_HUMAN]	156347	203291	130420	152651	210567	241598	162043	138910	105883	121745	129287	145655	124716	117202	105388	101737	124357	174472	137530	168448	158804	130260	203380	186836	7.22529e-15	0.107661	0.00745918	0.999809	-0.446353	-0.549901	-0.15219	0.967942	2.12731	8.28772e-05
O00425	7	5	478.33	Insulin-like growth factor 2 mRNA-binding protein 3 OS=Homo sapiens GN=IGF2BP3 PE=1 SV=2 - [IF2B3_HUMAN]	19585	19336.8	13740.7	15248.3	16145.4	22557.1	19867	14707.4	20936.6	5253.06	15105.9	30260.1	47143.3	57369.1	26464	33909.4	39058.4	53481.6	18212.8	19350.8	23198.8	22548.2	11778.4	25406.6	4.14866e-18	1	0.00176622	1	-0.00655479	1.27177	0.176594	1.98262e-08	2.75295	9.69355e-09
Q9Y6M1	7	5	451.18	Insulin-like growth factor 2 mRNA-binding protein 2 OS=Homo sapiens GN=IGF2BP2 PE=1 SV=2 - [IF2B2_HUMAN]	48678.2	43860.5	47683.1	34216.7	34223.6	43905.4	57102.4	43242.9	79414.7	44507.9	50778	64540.5	72139.9	64227.5	49857	54851.5	63750.8	61126.8	51378.1	44671.4	52274.4	41789.8	26805	57169.8	9.40888e-07	0.887105	0.4881	1	0.427109	0.534991	0.117972	0.0520251	0.311491	1.25309e-10
Q15631	5	5	258.15	Translin OS=Homo sapiens GN=TSN PE=1 SV=1 - [TSN_HUMAN]	106636	135643	101384	108808	128972	148690	97071.1	101781	65057	74278.6	85158.6	90883.6	85494	78349	82002.3	84147.3	80752.4	108939	102433	111939	113488	96632.1	133643	114675	2.48462e-18	0.000114687	0.000301159	0.999416	-0.505746	-0.490524	-0.117962	3.94048	3.5212	0.000253617
Q8WWM7	5	5	240.98	Ataxin-2-like protein OS=Homo sapiens GN=ATXN2L PE=1 SV=2 - [ATX2L_HUMAN]	69048	86673.8	55052.1	103181	104217	100139	69790.2	66267.9	69366	70905	68847.1	83596.5	65376.9	63500.3	55457.3	81889.8	82778.7	88777.7	66775	79581.6	75059.5	87326	109435	92486.8	4.91817e-20	0.952459	0.97189	1	-0.273606	-0.24361	-0.0214445	0.0211537	0.0123828	0
Q16630	5	5	345.9	Cleavage and polyadenylation specificity factor subunit 6 OS=Homo sapiens GN=CPSF6 PE=1 SV=2 - [CPSF6_HUMAN]	46789.2	42919.3	41891.2	52039.4	41513.5	54960.1	55756.1	55191.2	47490.4	55671	41610.6	52013.9	50026.8	46788.9	47198.6	61042.2	39372.7	54117.5	39756.2	46825	51834.5	42296.4	50709.8	50284.5	1.01561e-06	0.99917	0.999998	1	0.135673	0.0919491	0.00818549	0.000360402	7.74262e-07	0
P04183	6	5	303.09	Thymidine kinase, cytosolic OS=Homo sapiens GN=TK1 PE=1 SV=2 - [KITH_HUMAN]	78005.7	74843.8	77131.8	73001.6	76407.1	72091.7	78895.9	95918.9	86829.5	65853.2	80665.2	79302.8	76964.6	95991.2	107594	71706	106067	83839.5	79158	66550.3	79450.9	91871	85033.5	53231.1	1.77499e-15	0.999996	0.880755	1	0.110632	0.264057	0.0121331	1.72493e-06	0.055145	0
Q14696	5	5	181.78	LDLR chaperone MESD OS=Homo sapiens GN=MESDC2 PE=1 SV=2 - [MESD_HUMAN]	61705.5	60866.1	62561.9	73698.8	50004.4	94026.3	72438.3	59480.7	54399.7	58350.2	48944.5	67292.7	61111.3	61500.5	63492.7	58210.4	53765.8	70149.4	62703.6	74991	65438.8	60609	62599.8	80026	0.000359886	0.999995	1	1	-0.158666	-0.129682	0.012498	2.07034e-06	2.33966e-08	0
P25685	8	5	538.73	DnaJ homolog subfamily B member 1 OS=Homo sapiens GN=DNAJB1 PE=1 SV=4 - [DNJB1_HUMAN]	193310	206959	160578	160730	170056	187834	177134	179768	127872	138959	137297	156546	165742	156917	152281	141261	140917	165505	178297	207756	161571	170235	187112	194717	1.74345e-15	0.460597	0.593673	1	-0.234422	-0.226507	0.0267721	0.336679	0.226453	0
P84090	6	5	298.1	Enhancer of rudimentary homolog OS=Homo sapiens GN=ERH PE=1 SV=1 - [ERH_HUMAN]	207287	169560	180332	280653	234119	229393	224752	187267	160883	249135	195072	176622	146471	124708	176267	235528	165425	187710	195286	215808	216390	234087	264116	215859	1.13111e-13	0.999997	0.713054	1	-0.124526	-0.328828	0.0438933	1.50275e-06	0.146878	1.76966e-11
Q9NZT2	6	5	397.18	Opioid growth factor receptor OS=Homo sapiens GN=OGFR PE=1 SV=3 - [OGFR_HUMAN]	64841.7	83150.9	69279	70261.7	69857.6	91278.9	67860.7	67297.6	53441.5	61474.5	60063.9	66789.7	58812.1	55715.3	53303.4	53539.1	55981.3	77262.1	74175.9	70708.9	88955.8	81254.3	75587.5	86637.8	1.58155e-07	0.961383	0.636259	1	-0.251365	-0.339407	0.0893034	0.0171038	0.196366	7.57599e-08
O43747	5	5	221.8	AP-1 complex subunit gamma-1 OS=Homo sapiens GN=AP1G1 PE=1 SV=5 - [AP1G1_HUMAN]	115015	111831	92145.6	121861	115576	134254	108911	110380	90973.3	92490.5	90614.2	145026	109965	124629	92744.6	108289	100515	135682	109603	110424	114168	103119	106102	160633	0.0298603	0.999734	1	1	-0.113572	-0.0399381	0.0276531	0.000115625	7.51288e-12	0
Q6P5R6	5	5	258.88	60S ribosomal protein L22-like 1 OS=Homo sapiens GN=RPL22L1 PE=1 SV=2 - [RL22L_HUMAN]	199404	157870	192664	141701	128280	105309	184832	159313	223305	188649	185267	134218	193057	177885	142332	160350	190348	90980.5	163269	154142	149966	201917	102203	110608	1.23059e-09	0.99982	1	1	0.217239	0.0456226	-0.0688558	7.83255e-05	0	7.4393e-13
P30085	5	5	169.54	UMP-CMP kinase OS=Homo sapiens GN=CMPK1 PE=1 SV=3 - [KCY_HUMAN]	44754.1	53688.9	42888.8	48918.9	55918.7	45467.1	43875.7	48329	41154.2	37075.3	42741.4	48581.9	48726.3	54830.6	51600.6	40223	55245.9	52989.5	46221.4	59045.1	42965.3	48361.8	57709.6	44448.3	1.47321e-11	0.996765	1	1	-0.15594	0.0580762	0.0347755	0.00140709	7.09162e-10	0
Q9BQA1	5	5	257.11	Methylosome protein 50 OS=Homo sapiens GN=WDR77 PE=1 SV=1 - [MEP50_HUMAN]	95708.2	102035	74470.8	61606.1	57859	130350	95911.2	109121	62886.9	51937.1	53699.2	92125.6	95762.7	103854	84365.6	63311.3	63581.1	123580	104820	118998	86828.6	59928.3	59452.9	110253	0.454601	0.999992	1	1	-0.164789	0.0339367	0.0495802	3.47573e-06	0	0
P11177	5	5	311.07	Pyruvate dehydrogenase E1 component subunit beta, mitochondrial OS=Homo sapiens GN=PDHB PE=1 SV=3 - [ODPB_HUMAN]	132452	142895	138174	166319	146451	182774	134463	130589	115204	144335	131829	147615	137688	135415	152339	178125	122960	177289	148528	152148	164460	161844	151759	187402	1.19459e-11	0.940099	1	0.999952	-0.177123	-0.00835276	0.0878549	0.0268263	0	2.0887e-05
Q92552	6	5	451.48	28S ribosomal protein S27, mitochondrial OS=Homo sapiens GN=MRPS27 PE=1 SV=3 - [RT27_HUMAN]	41540.9	42447.6	35295	18295.3	17453.2	28339.5	32376.5	34465.9	34563.4	23777.3	24489.3	39141.4	39754.9	49737.7	31096	33215.2	25664.7	41331.4	36991.5	35803.2	28066.5	23447.7	17257.8	23971.1	0.000523849	1	0.953055	1	0.0421941	0.267968	-0.147609	9.5757e-09	0.0208818	9.81518e-09
Q96P11	5	5	381	Putative methyltransferase NSUN5 OS=Homo sapiens GN=NSUN5 PE=1 SV=2 - [NSUN5_HUMAN]	21451.6	31063.5	20464.6	18204.6	18119.5	24476.2	31587	34840.9	23483.3	28017.3	22641.4	25333.4	18322.8	22474.2	21691	21651.5	13372.2	22443.2	16659.4	21034.7	32894.4	14876.7	17675.2	23297.2	0.00343168	0.995119	1	1	0.310481	-0.157369	-0.081436	0.00212503	9.95403e-08	3.01678e-10
Q9H3N1	5	5	205.76	Thioredoxin-related transmembrane protein 1 OS=Homo sapiens GN=TMX1 PE=1 SV=1 - [TMX1_HUMAN]	81276.7	143863	94050.7	165329	129087	108518	94277.6	127239	70205.9	161622	112706	88246.7	76767.3	86054.6	93504.1	155525	81188	100333	121819	153683	139077	173173	142540	134111	5.38607e-05	0.999989	0.975638	0.967009	-0.142301	-0.283312	0.259457	4.88701e-06	0.0107115	0.0145693
P41223	5	5	175.99	Protein BUD31 homolog OS=Homo sapiens GN=BUD31 PE=1 SV=2 - [BUD31_HUMAN]	25942.9	39820.5	25501.7	45876	39885	36738.5	36603	44225.1	41661.7	43195.8	46164.2	51933.1	24727	22697.4	15951	24324.9	26309.5	26668	33273.6	40421.3	43016.6	42503.8	39191.9	48266.7	1.12925e-14	0.753562	0.0188789	0.984772	0.303328	-0.603629	0.206582	0.122881	1.72402	0.00666439
Q13330	5	5	289.42	Metastasis-associated protein MTA1 OS=Homo sapiens GN=MTA1 PE=1 SV=2 - [MTA1_HUMAN]	35773.6	40587	27488.9	56085.4	48215.3	53128	40976.3	50704.5	37673.9	60790.8	41939.3	52645.1	46553.1	48217.9	42870.1	61989.6	43662.9	57041.2	28804.9	28072.8	40931	40154.6	40772.6	44627.6	0.00106823	0.999613	0.947073	0.978166	0.124007	0.200984	-0.226194	0.000167959	0.0236168	0.00958736
Q9BZE1	5	5	257.46	39S ribosomal protein L37, mitochondrial OS=Homo sapiens GN=MRPL37 PE=1 SV=2 - [RM37_HUMAN]	39297.9	37391.6	46075.1	40098.4	35945.9	55802.3	52240.4	33387	38966.3	35155.6	36559.8	51270.4	43054.4	56001.9	48107.8	66648.7	46517.3	46207.2	36884.5	39307.8	41758.4	36556.2	29150.8	43970.1	1.11211e-06	1	0.988036	0.999986	-0.040405	0.267766	-0.16162	0	0.00522745	6.11607e-06
O00515	5	5	209.54	Ladinin-1 OS=Homo sapiens GN=LAD1 PE=1 SV=2 - [LAD1_HUMAN]	83043.3	100478	81084.2	105934	117304	115973	86847.7	78161.9	77478.5	95477.9	88581.3	88918.8	88079.9	83520.5	87609.8	99461.9	86233	113273	93793.7	127697	116126	105802	145658	136420	7.10305e-11	0.869288	0.999942	0.599654	-0.228234	-0.113387	0.26486	0.0608361	2.50883e-05	0.222099
P56537	6	5	423.59	Eukaryotic translation initiation factor 6 OS=Homo sapiens GN=EIF6 PE=1 SV=1 - [IF6_HUMAN]	397819	287577	348929	259635	279603	261372	262781	273734	356068	323232	328971	297271	354430	294552	293510	280518	332389	308386	335478	369154	283473	351787	224443	237029	0.358506	1	1	1	0.00558896	0.022508	-0.0266398	0	0	0
P52815	5	5	273.05	39S ribosomal protein L12, mitochondrial OS=Homo sapiens GN=MRPL12 PE=1 SV=2 - [RM12_HUMAN]	337919	302882	286045	441721	320128	375872	318317	344112	272533	409784	336293	320612	256213	317551	286963	441470	278866	284973	391339	478276	359948	448555	361795	388484	2.43778e-05	1	0.999621	0.949885	-0.0446494	-0.145863	0.234164	0	0.000164471	0.0223289
O60341	6	5	299.92	Lysine-specific histone demethylase 1A OS=Homo sapiens GN=KDM1A PE=1 SV=2 - [KDM1A_HUMAN]	25832.1	36442.5	24232.1	37153.6	33341.4	42458.1	44710.9	44855.8	38786.5	38979.3	37409.5	42059.5	23446.8	29040	24034.2	27620.4	19144.5	28347.2	30003.7	31456.4	36246.1	35256.5	40080.7	45614.5	4.13184e-16	0.49903	0.255335	0.9996	0.307253	-0.395514	0.132577	0.301874	0.59289	0.000173653
Q6NZI2	5	5	421.13	Polymerase I and transcript release factor OS=Homo sapiens GN=PTRF PE=1 SV=1 - [PTRF_HUMAN]	43833.9	54386.3	41987.6	35900.4	37412.7	43448.7	34494.3	34715.2	36043	28863	27275.1	35735.1	68766.9	69592.6	72350	63986.1	46299.6	58469.8	37956.3	41687	40671.6	32126.7	27176.6	32575.4	5.63231e-20	0.302746	0.00675971	0.806366	-0.382482	0.562369	-0.276216	0.518921	2.17007	0.093468
Q92890	5	5	281.34	Ubiquitin fusion degradation protein 1 homolog OS=Homo sapiens GN=UFD1L PE=1 SV=3 - [UFD1_HUMAN]	110529	126694	93793.6	141497	137134	135338	137169	137000	113607	145240	127566	138390	89307.3	95706.4	109245	116111	100239	121910	141405	135578	138328	121670	184339	156377	1.45898e-05	0.999952	0.866536	0.829869	0.100933	-0.236103	0.236509	2.07518e-05	0.0622134	0.0809906
Q99584	5	5	136.06	Protein S100-A13 OS=Homo sapiens GN=S100A13 PE=1 SV=1 - [S10AD_HUMAN]	24720.3	18069	19312.3	18224.9	17043.6	28901.5	13323	18120	7286.72	14222.7	15690.2	17711.4	29457.3	30030.5	25226.3	23849.7	26862.1	32235.6	21961.2	28619.3	27417	20768.1	27253.3	25874.3	7.47654e-11	0.465799	0.895311	0.998146	-0.548196	0.409022	0.266529	0.331802	0.0480262	0.000805754
P04080	5	5	205.68	Cystatin-B OS=Homo sapiens GN=CSTB PE=1 SV=2 - [CYTB_HUMAN]	45688.9	64985.1	48806.7	66337.6	50635.6	61463	55277	62475.3	47751.6	33907.9	31992.7	41446.1	36676.2	51658.3	77203.9	37690.1	46908.8	65773	85698.4	211366	89995.6	56762.5	112186	63518.2	2.96634e-08	0.999999	1	0.967082	-0.308557	-0.0971536	0.874498	6.28746e-07	0	0.0145367
Q13217	5	5	244.23	DnaJ homolog subfamily C member 3 OS=Homo sapiens GN=DNAJC3 PE=1 SV=1 - [DNJC3_HUMAN]	54127.9	59181.2	73347.9	71464.3	63581.4	71015.1	96834.4	51719.4	64979	60149.6	50069.3	62101.6	43741.9	77570.8	52439.7	61672.8	55910	75516.8	104042	110601	52452.3	70399.2	70912.3	83551	9.61267e-10	1	0.999998	0.92052	-0.0254408	-0.0982951	0.325044	1.75324e-12	7.21138e-07	0.0359668
O00264	5	5	306.8	Membrane-associated progesterone receptor component 1 OS=Homo sapiens GN=PGRMC1 PE=1 SV=3 - [PGRC1_HUMAN]	261666	97992.5	150877	80511.3	217705	76906.5	186069	100902	126257	85162.5	98841.8	113857	203130	236772	164118	173473	42750.3	179961	186594	342788	148273	157200	163213	218608	7.7649e-05	1	1	0.91921	-0.316716	0.175475	0.458125	9.26155e-08	6.78345e-09	0.0365851
Q9BS26	5	5	219.77	Endoplasmic reticulum resident protein 44 OS=Homo sapiens GN=ERP44 PE=1 SV=1 - [ERP44_HUMAN]	50609	61317.5	46056.6	79187.3	70139.6	72988.1	62171	72617.8	42242.2	77592.6	61383	54352	52754.4	58110.2	56621.2	75244.8	58706.7	62484.9	76262.9	87419.6	62818.8	84385.4	93661	78318.2	0.000373879	1	1	0.489099	-0.0382077	-0.0635007	0.344492	0	8.41231e-13	0.310603
P55809	5	5	300.97	Succinyl-CoA:3-ketoacid coenzyme A transferase 1, mitochondrial OS=Homo sapiens GN=OXCT1 PE=1 SV=1 - [SCOT1_HUMAN]	26531.3	23138.3	20697	11534.3	11828.8	10626.3	21095.7	19280.1	18517.1	21514.3	10610.9	10331	26427	20511.5	32914.7	16044.1	11925.2	16819.7	19021.8	10654.4	11373.4	8175.62	6695.27	6490.85	0.000937243	1	1	0.903307	-0.0421809	0.25628	-0.741634	0	1.81464e-07	0.0441645
Q9BUF5	29	5	1516.29	Tubulin beta-6 chain OS=Homo sapiens GN=TUBB6 PE=1 SV=1 - [TBB6_HUMAN]	66813	59226.7	61536.1	45306.8	67377.7	33125	51188.5	50667.2	50454.7	32550	39681.5	42359.2	99894.2	73358.8	96485.1	56250.1	74554.3	65494.9	46637.8	26551.9	34119	36961.7	44058.4	20948.8	5.23934e-13	0.999043	0.853473	0.350014	-0.320885	0.483256	-0.671774	0.000415776	0.0688103	0.455914
O14929	5	5	300.86	Histone acetyltransferase type B catalytic subunit OS=Homo sapiens GN=HAT1 PE=1 SV=1 - [HAT1_HUMAN]	187209	177715	133124	104776	128291	200775	207867	209794	156443	111509	114159	189293	148552	145281	145880	114969	108552	194077	198992	187710	186456	131525	180596	215102	7.97028e-05	1	1	0.962905	0.0859062	-0.120341	0.239771	8.72732e-10	1.94908e-07	0.0164166
Q15370	5	5	183.72	Transcription elongation factor B polypeptide 2 OS=Homo sapiens GN=TCEB2 PE=1 SV=1 - [ELOB_HUMAN]	69440.7	82905.2	60416.1	68905.6	71317	90058.1	81790.3	111037	59041.5	85238.4	63578.9	71070.7	62396	70595.4	61560.4	71225.1	60596.3	76063.2	91283.4	122967	102836	85131.9	87258.4	96202.7	4.09581e-12	1	0.999977	0.333298	0.0905992	-0.138684	0.402666	7.38096e-10	1.01837e-05	0.477167
P02768	7	6	416.88	Serum albumin OS=Homo sapiens GN=ALB PE=1 SV=2 - [ALBU_HUMAN]	780512	923320	886465	1.0844e+06	1.01554e+06	619773	931394	1.14554e+06	912444	1.58592e+06	1.1604e+06	1.18615e+06	628025	829286	686339	899690	685624	593329	1.40856e+06	1.8598e+06	904141	2.10837e+06	1.5266e+06	2.1631e+06	3.00318e-16	0.995407	0.999844	0.155397	0.382439	-0.296918	0.908961	0.00199909	6.77096e-05	0.808558
Q5JTV8	6	6	296.36	Torsin-1A-interacting protein 1 OS=Homo sapiens GN=TOR1AIP1 PE=1 SV=2 - [TOIP1_HUMAN]	47990.3	39682.1	29373.2	98978.1	69855.2	62820.3	66331.8	71014	51490.3	111026	57340.2	71313.8	41929.8	44619.5	39893.6	79361.2	45384.9	50494.5	79743.7	105056	70937.2	84573.7	103418	96071.6	7.60631e-10	0.740825	0.999991	0.00334445	0.297366	-0.208947	0.630441	0.130284	3.80117e-06	2.47568
Q96T76	7	6	386.61	MMS19 nucleotide excision repair protein homolog OS=Homo sapiens GN=MMS19 PE=1 SV=2 - [MMS19_HUMAN]	24934.1	23523.5	33475.4	24276.5	31921.7	11364.7	19895.7	18683	26292.6	19022.1	21473	17970.2	27984.6	24680.1	36856.9	25218.8	27302.5	20828.1	16565.1	17490.4	12777.7	14681.5	19108.8	7099.48	8.28497e-10	0.999999	1	0.486957	-0.277504	0.123624	-0.769079	2.8978e-07	2.32587e-08	0.312509
Q52LJ0	6	6	395.97	Protein FAM98B OS=Homo sapiens GN=FAM98B PE=1 SV=1 - [FA98B_HUMAN]	50928.1	44495.8	37231.8	24707.9	22288.4	57380.1	56112.5	58085.4	49196.3	39741.3	34664.9	47146.5	38509.6	40906	36365	23110.6	26437.1	40295.6	53840.5	53793.1	46387.4	39476.1	37630	49489.6	0.00255334	0.929759	0.999991	0.949468	0.265611	-0.205074	0.243519	0.0316294	3.89324e-06	0.0225198
Q9Y6V7	6	6	285.62	Probable ATP-dependent RNA helicase DDX49 OS=Homo sapiens GN=DDX49 PE=1 SV=1 - [DDX49_HUMAN]	18084.5	20476.9	18463.5	28287.4	20837.7	18620.5	28230.7	25664.3	20924.4	28613.7	24755.6	24484.2	14232.8	15936.3	18031	15225.7	12605.6	18571.6	15482.5	14048.8	17691.4	13473.7	16753.9	15323.6	1.22054e-09	0.993868	0.922592	0.883585	0.291167	-0.399319	-0.427487	0.00267143	0.0349901	0.0537516
Q8N7H5	6	6	347.43	RNA polymerase II-associated factor 1 homolog OS=Homo sapiens GN=PAF1 PE=1 SV=2 - [PAF1_HUMAN]	57919.7	58630.6	59306.6	65218.8	74297.8	77462.1	79858.9	83691.2	55900.4	98268	67904.2	70994.3	51831.7	54449.2	66639.5	81762.5	50664.4	64295.8	80463.1	103173	92662.7	99054.3	85800.8	88091.3	2.55635e-09	0.995648	1	0.118146	0.217059	-0.0877932	0.483525	0.00189415	8.92538e-08	0.927581
P07602	6	6	245.11	Proactivator polypeptide OS=Homo sapiens GN=PSAP PE=1 SV=2 - [SAP_HUMAN]	267173	273513	221994	338668	281098	319661	308274	365967	223577	327372	240563	288312	273150	275919	292290	315868	237136	359032	311069	448918	317510	300882	356480	369670	3.12462e-08	1	1	0.709891	0.0433807	0.0428298	0.306176	0	7.79996e-13	0.148808
P42167	18	6	1074.25	Lamina-associated polypeptide 2, isoforms beta/gamma OS=Homo sapiens GN=TMPO PE=1 SV=2 - [LAP2B_HUMAN]	152940	136534	102162	252171	171516	152687	208499	201975	149057	347586	208593	176615	98265.7	122059	112032	206826	129025	122100	192621	219979	193531	232451	230289	196799	5.84464e-11	0.151703	0.792978	0.109895	0.416876	-0.292606	0.386811	0.819007	0.100739	0.95902
O75940	6	6	357.62	Survival of motor neuron-related-splicing factor 30 OS=Homo sapiens GN=SMNDC1 PE=1 SV=1 - [SPF30_HUMAN]	90517.4	100152	61977.9	81913.7	87123.5	104911	132951	127036	122302	112143	109450	144796	76134.1	78725.3	57657.4	71839.6	68809.4	91037.3	142376	142647	133382	109468	154957	161250	3.46398e-21	0.00148694	0.789353	3.0687e-06	0.50765	-0.245476	0.680684	2.82771	0.102729	5.51305
Q15366	10	6	761.6	Poly(rC)-binding protein 2 OS=Homo sapiens GN=PCBP2 PE=1 SV=1 - [PCBP2_HUMAN]	289330	245437	286947	280637	302166	196235	248256	255643	237628	173004	222067	221340	302314	267259	272037	213262	210747	238630	179825	110443	158334	126562	165290	155390	2.37859e-06	0.999866	1	0.0333986	-0.237333	-0.0897087	-0.837432	5.83421e-05	1.59807e-11	1.47627
P52948	6	6	390.12	Nuclear pore complex protein Nup98-Nup96 OS=Homo sapiens GN=NUP98 PE=1 SV=4 - [NUP98_HUMAN]	50648.7	52515.7	56400.6	47615.4	43387.7	43872.1	50886.9	46725.3	46011.6	60371.7	41380.4	48132.6	46397.3	43849.7	57461.4	46693.5	32322.3	43727.2	46495	32237.8	39129.4	38657.2	36979.2	41486	0.0261782	1	0.999917	0.606766	-0.00457261	-0.122605	-0.325408	0	3.59538e-05	0.216979
Q9NP72	6	6	414.46	Ras-related protein Rab-18 OS=Homo sapiens GN=RAB18 PE=1 SV=1 - [RAB18_HUMAN]	70723.1	71025.2	46375.4	94598	70577.1	76858.5	89081.2	85540.1	65647.2	99913.6	72177.3	87238.4	62292.5	68762.9	51666.3	85477.1	68891.6	67077.7	88364.1	104180	67582.1	94920.8	85009.3	95757.1	4.53842e-12	0.842661	1	0.258157	0.215903	-0.0899091	0.316867	0.0743471	8.01435e-08	0.588117
Q99829	6	6	312.32	Copine-1 OS=Homo sapiens GN=CPNE1 PE=1 SV=1 - [CPNE1_HUMAN]	17192.8	19742.7	10876.7	6687.54	6020.46	13890.1	13013.3	13666.5	17650.2	7081.48	10688.4	11401	7575.45	28144.4	13327.4	15215.5	16189	11685.5	25133.9	39227.6	12629.5	15292.1	5636.22	14313.9	2.05483e-08	1	0.999951	0.994434	-0.017741	0.308283	0.592928	0	2.11943e-05	0.00242423
O60231	6	6	252.77	Putative pre-mRNA-splicing factor ATP-dependent RNA helicase DHX16 OS=Homo sapiens GN=DHX16 PE=1 SV=2 - [DHX16_HUMAN]	24507.5	36234.1	31540	45834	37943	42606.4	44790.7	42329.1	38510.9	42654.1	44555.8	47175	28210.7	26963.9	28533.5	43445.1	32666.7	38557.6	36374.3	41013.6	45488.8	41718.1	39291.1	49672.1	5.16006e-08	0.898892	0.99997	0.973769	0.249876	-0.140474	0.213594	0.0462925	1.32335e-05	0.0115441
Q99733	8	6	519.62	Nucleosome assembly protein 1-like 4 OS=Homo sapiens GN=NAP1L4 PE=1 SV=1 - [NP1L4_HUMAN]	100359	88901.1	101125	47667.2	77048	63327.9	78472.2	85791.6	72411.5	52861.8	54030.1	57549.4	110345	83657.2	89253.4	62716.4	59692.3	80553.5	73193.7	63738.6	57242.9	50653.9	63181.5	54104.5	9.99153e-08	0.991205	1	0.682652	-0.254282	0.023298	-0.401856	0.00383632	0	0.1658
P42766	8	6	413.13	60S ribosomal protein L35 OS=Homo sapiens GN=RPL35 PE=1 SV=2 - [RL35_HUMAN]	167464	161616	127552	143315	83709.8	146797	185422	184412	159430	185706	187944	190423	150104	192046	86204.6	194172	162645	128558	249680	318640	272768	310486	158607	255674	0.000189326	0.999891	1	0.7646	0.396768	0.137868	0.91498	4.74657e-05	0	0.116566
Q16576	10	6	394.82	Histone-binding protein RBBP7 OS=Homo sapiens GN=RBBP7 PE=1 SV=1 - [RBBP7_HUMAN]	107615	89308.3	128449	165759	154220	146786	138919	85377	132123	118211	172374	155258	125441	78555.1	131950	108991	142151	129317	98200.2	65460.2	108542	123902	186149	101909	0.00261955	1	1	0.999871	0.0183215	-0.144976	-0.21141	0	8.90128e-09	5.6078e-05
P35222	10	6	502.01	Catenin beta-1 OS=Homo sapiens GN=CTNNB1 PE=1 SV=1 - [CTNB1_HUMAN]	67144.8	69600.1	57772.7	89649.2	85152.8	87568.5	110845	120852	91490.9	128537	106445	111543	67453.7	72567.7	53966.9	96933.8	78368.7	84071.9	117908	147477	132845	136124	160445	142219	1.19813e-24	0.000177208	1	7.02494e-10	0.551703	-0.011175	0.873419	3.75152	0	9.15336
P24539	6	6	337.52	ATP synthase F(0) complex subunit B1, mitochondrial OS=Homo sapiens GN=ATP5F1 PE=1 SV=2 - [AT5F1_HUMAN]	91106	63150.3	67197.2	157110	98971.8	87557.2	98848.6	90873.8	90510.8	216687	166434	102880	76026.2	64924.4	67941.2	190816	140906	81869.3	123686	151421	145849	297889	197893	149028	0.000936899	0.955868	1	0.0286864	0.439299	0.139547	0.915331	0.0196019	1.38714e-12	1.54232
[truncated: 798 more rows]
