# Supplementary material for: Systematic analysis of synergistic proteome modulations in a drug combination of cisplatin and MLN4924
Source: Royal Society of Chemistry journal article supplement (doi:10.1039/c8mo00115d), 2018-09-20
Supplement: c8mo00115d3.xlsx [file c8mo00115d3.xlsx]

## Sheet: Proteins with Synergy Scores
					UNTREATED						MLN4924						CISPLATIN						COMBI (MLN4924+CISPLATIN)							Tukey-HSD test			Log2 ratios
Accession	Peptide count	Unique peptides	Confidence score	Description	Replicate 1	Replicate 2	Replicate 3	Replicate 4	Replicate 5	Replicate 6	Replicate 1	Replicate 2	Replicate 3	Replicate 4	Replicate 5	Replicate 6	Replicate 1	Replicate 2	Replicate 3	Replicate 4	Replicate 5	Replicate 6	Replicate 1	Replicate 2	Replicate 3	Replicate 4	Replicate 5	Replicate 6	p ANOVA FDR	MLN-untreated	Cisplatin-untreated	Combi-untreated	MLN/untreated	Cisplatin/untreated	Combi/untreated	Synergistic Score
P53999	2	2	78.12	Activated RNA polymerase II transcriptional coactivator p15 OS=Homo sapiens GN=SUB1 PE=1 SV=3 - [TCP4_HUMAN]	4694.5	19605.2	1969.9	2575.62	1447.64	8686.75	4027.89	7030.19	5917.84	7997.79	10580	9481.45	4062.37	9929.07	1974.56	10378.8	7003.33	5740.09	28239.8	78174.7	15260.7	36883.1	33217.3	37227	2.42926e-19	0.956682	0.999956	1.22191e-07	0.208332	0.00401549	2.55457	12.0301
Q6DKJ4	2	2	153.13	Nucleoredoxin OS=Homo sapiens GN=NXN PE=1 SV=2 - [NXN_HUMAN]	30000.9	27138.5	26841	36908.3	42772.8	33376.7	28039.8	22534.3	27324.1	22631.1	29995.6	25559.7	40005.6	29477.2	37973.6	39027.8	37347.7	35206.4	15377.4	9225	17003.8	16205.5	24174.1	10697.3	5.95084e-15	0.946106	0.999978	2.27494e-06	-0.336146	0.152707	-1.0881	5.93166
P48507	3	3	140.85	Glutamate--cysteine ligase regulatory subunit OS=Homo sapiens GN=GCLM PE=1 SV=1 - [GSH0_HUMAN]	31965.2	39433.6	24356.6	32195.4	29292.3	33871.7	70376.7	81230.6	53990.9	47224	55788	67485.9	21948.7	24127.5	15278.8	17233.4	20030.5	22090.7	61000.3	82057.6	58405.3	67384.4	86475	82870.4	1.35857e-31	2.47162e-06	0.00593458	3.58322e-09	0.976662	-0.6629	1.19713	3.8154
P69905	4	4	184.82	Hemoglobin subunit alpha OS=Homo sapiens GN=HBA1 PE=1 SV=2 - [HBA_HUMAN]	38092.4	38408.1	32388.2	98031	73954.4	46108.3	73469.2	119759	50191.2	174449	145044	118359	39614.9	44140.6	34861.2	90035.6	83787.3	41849.9	255938	513655	129128	390916	269479	202973	1.98728e-11	0.155894	1	3.12896e-08	1.05902	0.0318849	2.43	2.22752
O14828	5	5	325.1	Secretory carrier-associated membrane protein 3 OS=Homo sapiens GN=SCAMP3 PE=1 SV=3 - [SCAM3_HUMAN]	48521	30642.3	23075.8	42414.5	31936.2	43835.9	45819.8	48302.8	44523.4	62330.9	54933.3	60197.4	30559.3	36892.7	17298.7	48564.2	42862.8	41254.1	67034.9	100036	48667	98012.7	79446.2	83593.5	1.05611e-10	0.407394	1	6.94786e-05	0.520124	-0.0197298	1.11306	2.22437
O95456	2	2	97.93	Proteasome assembly chaperone 1 OS=Homo sapiens GN=PSMG1 PE=1 SV=1 - [PSMG1_HUMAN]	16784.3	17517.2	21974.5	10644.6	14823.4	11178.8	13278.8	13465.6	15928	5116.74	10918.6	12605.5	16125.9	16478.3	17435.2	8650.39	11425.7	13141.8	8986.25	6089.72	8686.13	7457.02	8689.21	6108.24	6.62989e-08	0.953707	1	0.0101568	-0.381862	-0.158456	-1.01388	1.87645
Q9BV44	2	2	101.62	THUMP domain-containing protein 3 OS=Homo sapiens GN=THUMPD3 PE=1 SV=1 - [THUM3_HUMAN]	10385.2	8740.8	8453.92	4557.47	8089.81	4452	7114.3	3848.39	4018.94	1915.06	3852.85	5643.79	7644.6	5377.19	9027.05	2516.97	6227.8	5191.18	2779.42	2281.59	1911.55	1180.22	3503.02	695.867	6.26804e-12	0.816742	0.999981	0.000204174	-0.759431	-0.312217	-1.8549	1.73088
Q02809	4	4	170.52	Procollagen-lysine,2-oxoglutarate 5-dioxygenase 1 OS=Homo sapiens GN=PLOD1 PE=1 SV=2 - [PLOD1_HUMAN]	11673.3	10572.3	16430.9	19383.1	14522.2	11451.1	8523.38	6391.52	8303.92	8115.75	7885.49	7341.21	14468.9	13901	19237.1	19802.9	14366.4	12355.4	6062.5	3676.09	7675.92	7304.28	7532.09	4660.86	2.08919e-16	0.0014177	0.999921	1.64825e-07	-0.851823	0.163728	-1.18687	1.72487
Q15041	2	2	63.83	ADP-ribosylation factor-like protein 6-interacting protein 1 OS=Homo sapiens GN=ARL6IP1 PE=1 SV=2 - [AR6P1_HUMAN]	75338.9	78022.4	50006.9	66128.8	45265.1	64820.5	90645.9	105067	71898.2	92534.8	71837.5	73733.2	74454.6	97359.5	62477	82749.5	58049.3	65283.6	113234	188119	125814	143929	93969.7	113940	4.53296e-10	0.587344	0.998499	1.0297e-05	0.413914	0.214314	1.03722	1.65102
Q9UID3	2	2	64.79	Vacuolar protein sorting-associated protein 51 homolog OS=Homo sapiens GN=VPS51 PE=1 SV=2 - [VPS51_HUMAN]	2114.85	3404.19	2726.55	2120.89	3030.38	1489.96	1856.37	1681.53	1870.71	721.158	310.951	1885.18	2141.22	2367.93	2491.12	1814.07	1773.18	1868.33	441.173	374.75	809.629	639.512	985.406	1123.19	1.16091e-15	0.0692267	0.999999	3.96768e-06	-0.838358	-0.257213	-1.76712	1.61297
Q9GZZ9	3	3	110.74	Ubiquitin-like modifier-activating enzyme 5 OS=Homo sapiens GN=UBA5 PE=1 SV=1 - [UBA5_HUMAN]	32322.7	33247.2	34746.7	26408.6	36361.1	19483.9	26345.4	25379.2	17561.5	13007.3	17633	24322.9	30818.7	24565.7	27220.2	19871.2	18895.9	27374.2	20013.6	8971.22	10793.7	9295.79	14062.6	7796.06	1.47452e-13	0.653703	0.999276	1.41787e-05	-0.555214	-0.295601	-1.36392	1.60308
P07099	2	2	94.36	Epoxide hydrolase 1 OS=Homo sapiens GN=EPHX1 PE=1 SV=1 - [HYEP_HUMAN]	27660.1	22809.8	23337	14637.1	13648	25179	31584.4	41600.9	31443.9	26000	19626.2	34805.5	21552.7	29558.7	29350.8	18621.4	14414	26968.4	40679.6	68950.2	38620.9	27393.9	41112.9	54202.5	1.22537e-05	0.677062	1	0.00239502	0.540096	0.142317	1.09018	1.59753
O95347	5	4	215.73	Structural maintenance of chromosomes protein 2 OS=Homo sapiens GN=SMC2 PE=1 SV=2 - [SMC2_HUMAN]	95865.5	104626	71964.8	124743	91036.7	98344.6	149463	149082	192205	206318	167888	268973	121094	111478	66475.8	93379.3	93542.6	123742	324926	414598	268396	221845	182754	352843	3.52098e-12	0.0175412	1	5.89539e-07	0.95093	0.0557978	1.58956	1.57894
Q15029	23	22	1440.27	116 kDa U5 small nuclear ribonucleoprotein component OS=Homo sapiens GN=EFTUD2 PE=1 SV=1 - [U5S1_HUMAN]	673308	673393	583385	888890	725846	631779	909795	976544	866669	1.26548e+06	1.11581e+06	1.14667e+06	736046	708509	571751	940443	715568	706562	1.34732e+06	1.65859e+06	978182	1.60866e+06	1.36933e+06	1.40778e+06	1.37763e-20	0.0750837	1	1.23452e-05	0.588657	0.0682321	1.00287	1.5267
P55039	4	4	203.69	Developmentally-regulated GTP-binding protein 2 OS=Homo sapiens GN=DRG2 PE=1 SV=1 - [DRG2_HUMAN]	10784.5	11963.6	10284.3	8534.11	13903	10248.1	8268.1	10322	4895.22	4859.76	6644.22	6156.2	11204.5	13731.8	10368	7795.94	9625.98	12049.3	6176.75	4245.02	4275.22	5163.59	7572.38	4551.01	1.32204e-24	0.0085865	1	3.07836e-06	-0.675545	-0.0208309	-1.03893	1.49191
O60502	3	3	137.98	Bifunctional protein NCOAT OS=Homo sapiens GN=MGEA5 PE=1 SV=2 - [NCOAT_HUMAN]	29871.1	19325.8	32543.2	15997.4	25897.7	14866.3	18932.7	16461.7	19605.2	12632.5	13712.2	13572.4	22436.8	13481.9	25445.7	12160.7	18099.5	16676	11659.2	5410.08	9687.14	9608.6	12481.5	9114.67	9.48848e-09	0.888357	0.997397	0.000852584	-0.545168	-0.354862	-1.25674	1.39634
Q6XQN6	4	4	132.99	Nicotinate phosphoribosyltransferase OS=Homo sapiens GN=NAPRT1 PE=1 SV=2 - [PNCB_HUMAN]	20050.9	24630.3	24892.1	16508.3	27230.8	20827.3	12175.7	16783	14918.3	14575.7	13591.1	10437	18524.3	22446	24733.1	18713.4	20363.4	20634.4	9775.83	12606.6	9004.13	11543.6	12811.2	7919.37	4.63406e-15	0.0157727	1	3.40034e-06	-0.701607	-0.0970327	-1.07526	1.34637
Q16763	4	4	227.2	Ubiquitin-conjugating enzyme E2 S OS=Homo sapiens GN=UBE2S PE=1 SV=2 - [UBE2S_HUMAN]	31353.7	33886.5	23676.7	32079.8	32169.3	32824.5	51913	59884.1	45891.4	49792.9	48277.9	50147.5	28754.4	40494.1	25257.7	34720	36629.4	33013.4	57896	79432	66595	65068.1	57791.4	64882.6	1.63674e-25	5.54126e-05	1	7.35642e-10	0.717865	0.0965901	1.07439	1.31916
P20645	2	2	141.78	Cation-dependent mannose-6-phosphate receptor OS=Homo sapiens GN=M6PR PE=1 SV=1 - [MPRD_HUMAN]	22421	21001.1	7864.19	36636.2	19120.6	12720.6	30480.6	35690.1	24280	53427.4	43348.7	33929.2	17305.7	30003.7	10013.7	51831.9	34963.8	14790	48534	87748.2	50013.3	72710.1	64067	50686.3	2.51007e-09	0.01232	0.994195	3.24436e-08	0.884872	0.408008	1.64192	1.26997
P53007	2	2	112.2	Tricarboxylate transport protein, mitochondrial OS=Homo sapiens GN=SLC25A1 PE=1 SV=2 - [TXTP_HUMAN]	4195.55	5718.3	2943.82	17139.7	13364.4	6465.63	6202.42	9419.65	6857.9	18458.6	25904.2	14240.8	7263.26	12727.3	5267.11	10018.9	25030.5	5689.32	13071.5	34344.3	9065.35	25539	24138.5	25643.5	0.00153474	0.900939	0.999672	0.0306474	0.70247	0.405447	1.40336	1.26667
Q9BTW9	3	3	182.19	Tubulin-specific chaperone D OS=Homo sapiens GN=TBCD PE=1 SV=2 - [TBCD_HUMAN]	23096.9	23120.7	23690.3	7778.89	9220.57	12011.1	6814.2	11848.2	13542.9	10865.8	4083.91	6210.36	17776	9663.92	17160.2	3433.85	6128.68	9928.36	3965.97	5635.84	7298.77	1569.19	4172.74	3810.79	5.33608e-09	0.46345	0.818258	1.95993e-05	-0.890333	-0.626118	-1.90279	1.25477
Q9HD45	2	2	73.38	Transmembrane 9 superfamily member 3 OS=Homo sapiens GN=TM9SF3 PE=1 SV=2 - [TM9S3_HUMAN]	12112.3	8304.66	5987.97	19536.7	17727.7	10890.8	15263.2	16409.7	9112.55	25371.3	20374.7	18573	11735.5	19833.9	5835.68	27425.5	22428.9	15098.8	23103.5	47802	16069.5	43737.9	25026.3	11721.6	0.00304806	0.938155	0.996039	0.0417625	0.495349	0.457152	1.16735	1.22556
Q86Y56	6	6	301.36	HEAT repeat-containing protein 2 OS=Homo sapiens GN=HEATR2 PE=1 SV=4 - [HEAT2_HUMAN]	48112.8	60093.9	69802.1	32547.1	51619.8	55634.3	40491.1	40222.9	43306.7	21324.9	23080.7	31017.2	43165.9	44547.2	69504.3	27395.4	30380.9	37667.1	24240.5	27280.6	33568.5	12881.3	18281.4	22928.2	2.59039e-07	0.121816	0.958976	1.66789e-05	-0.672185	-0.330963	-1.19121	1.18747
Q99805	3	3	105.94	Transmembrane 9 superfamily member 2 OS=Homo sapiens GN=TM9SF2 PE=1 SV=1 - [TM9S2_HUMAN]	23678.7	21036.3	8277.66	13788.5	12985.5	16843.6	22810.6	25663	23601.7	24316.8	10929.5	24598.8	24873.4	33628.7	9801.26	25930.3	26181.4	23619.1	36805.8	73752.8	24606	34047.7	22496.6	31440.9	9.16811e-08	0.928505	0.763267	0.00265622	0.449419	0.576161	1.20776	1.17764
P49755	6	6	306.5	Transmembrane emp24 domain-containing protein 10 OS=Homo sapiens GN=TMED10 PE=1 SV=2 - [TMEDA_HUMAN]	48652.5	42134.5	38582.7	69735.4	45550	42855.2	49786.8	64342.7	57246.2	109345	74807.9	58191	49155.8	68394.7	40383.9	88518.1	81113.3	48530.9	86778.4	155552	70098.1	158114	73412.6	61181.3	5.11289e-05	0.736017	0.981924	0.00387246	0.52504	0.387489	1.07365	1.17656
P02786	9	9	576.23	Transferrin receptor protein 1 OS=Homo sapiens GN=TFRC PE=1 SV=2 - [TFR1_HUMAN]	162342	135145	92264.8	168637	113464	89070.9	197354	191986	205488	227196	195610	238532	158756	191082	89046.2	228255	165694	118756	255976	397975	241744	354935	245850	281394	9.75345e-14	0.00505576	0.9605	6.44406e-08	0.723203	0.322585	1.22433	1.17072
P11279	4	4	247.34	Lysosome-associated membrane glycoprotein 1 OS=Homo sapiens GN=LAMP1 PE=1 SV=3 - [LAMP1_HUMAN]	57734.5	50350.9	40239.7	84831.1	65045.5	43239.9	92242.9	87538.4	63456.3	119074	87242.9	70743.7	73148	66104.7	50269.4	109609	70750.2	48756.3	119147	130343	97301.8	131324	125248	87056.4	1.0219e-06	0.0298382	0.9564	1.60256e-06	0.6077	0.294063	1.01584	1.1265
Q8TEX9	14	14	753.48	Importin-4 OS=Homo sapiens GN=IPO4 PE=1 SV=2 - [IPO4_HUMAN]	76760.5	76161.2	86534.6	81980.3	89923.8	54867	46202.9	45547.7	40556.8	32964.1	43409.1	40550.5	64893.7	52107.2	65426.1	46673.4	55971.6	58388.7	31858.3	17828.6	25573.2	27324.5	40101.9	21540.2	1.0755e-14	0.00593142	0.828868	1.56414e-08	-0.90355	-0.440889	-1.50535	1.11968
Q13085	5	4	228.93	Acetyl-CoA carboxylase 1 OS=Homo sapiens GN=ACACA PE=1 SV=2 - [ACACA_HUMAN]	30857.8	31435.2	33239.4	35646.4	50694.1	57137.3	19374.1	14604.8	21080.5	21088.6	26568.7	25501	32206.8	20523.5	35551.1	23022.4	42679.8	42653.9	13479.2	4920.18	17396.9	20331.2	23619.6	16743.1	5.12169e-16	0.0099203	0.995829	4.18094e-07	-0.898476	-0.281534	-1.30862	1.10899
P54819	10	10	685.52	Adenylate kinase 2, mitochondrial OS=Homo sapiens GN=AK2 PE=1 SV=2 - [KAD2_HUMAN]	393109	380456	346244	489406	404307	395536	265673	266733	201380	307071	232010	219678	359102	309308	377572	371462	286354	337850	204219	197252	197031	190375	210866	189441	2.14515e-17	9.89626e-07	0.756934	4.36796e-10	-0.690695	-0.238734	-1.0185	1.09583
Q5TFE4	9	9	448.92	5'-nucleotidase domain-containing protein 1 OS=Homo sapiens GN=NT5DC1 PE=1 SV=1 - [NT5D1_HUMAN]	70060.8	67242.6	60445.3	40111.2	58291	53291.3	40496.7	38892.3	29930.2	25212.9	30689.3	29419.3	57535.6	38307.4	51027.6	29848.5	43467.1	44843.5	25958.8	20363.1	22600.4	17490.4	32063.2	17746.1	3.23208e-17	0.000212228	0.545977	5.35304e-10	-0.84424	-0.398899	-1.35909	1.09328
P10620	3	3	174.28	Microsomal glutathione S-transferase 1 OS=Homo sapiens GN=MGST1 PE=1 SV=1 - [MGST1_HUMAN]	68669.3	63994.6	27563.5	64629.1	44458.1	56957.2	97990.7	109783	70057.5	84953.3	68044.8	87425.3	58774.4	93416.5	48804.9	83734	69611.2	73970	137349	173952	107039	96039.9	94880.1	115275	3.22758e-05	0.115342	0.880668	6.12269e-05	0.667586	0.392584	1.15098	1.08566
Q96IX5	3	3	222.51	Up-regulated during skeletal muscle growth protein 5 OS=Homo sapiens GN=USMG5 PE=1 SV=1 - [USMG5_HUMAN]	60829.5	62015.4	22561.4	78548.9	57105.3	42112.7	103249	119078	70870.1	124951	102988	109989	56403.6	111401	33722.2	136359	101803	75638.9	167122	285936	108737	242850	134899	156713	6.619e-12	0.0125613	0.576472	1.0564e-07	0.965619	0.673181	1.76221	1.0753
O95671	2	2	126.13	N-acetylserotonin O-methyltransferase-like protein OS=Homo sapiens GN=ASMTL PE=1 SV=3 - [ASML_HUMAN]	12782.2	13778.2	10888.3	7801.6	11439.2	12358.4	8100.56	9986.75	7318.78	4477.22	4922.88	7868.51	10231.8	9821.63	9133.01	6128.88	6992.04	8713.33	5968.11	3539.59	3295.85	1844.26	8175.99	7191.74	2.61119e-11	0.367849	0.970835	0.000247424	-0.694217	-0.436514	-1.20189	1.06293
Q96PD2	5	5	262.76	Discoidin, CUB and LCCL domain-containing protein 2 OS=Homo sapiens GN=DCBLD2 PE=1 SV=1 - [DCBD2_HUMAN]	73406.7	79234.5	65310.8	93269.7	77386.6	82819.7	50342.6	39056.8	38214.1	47990.2	33709.7	40787	61261.1	52518.7	51219.7	61323.2	45040.2	57642.9	19229.4	20395.7	32686.1	18746.1	44859.5	31264.1	4.22264e-32	1.81784e-06	0.0583517	4.3549e-10	-0.91453	-0.518924	-1.49563	1.04337
P05023	22	21	1232.13	Sodium/potassium-transporting ATPase subunit alpha-1 OS=Homo sapiens GN=ATP1A1 PE=1 SV=1 - [AT1A1_HUMAN]	396597	332565	231895	448471	369718	341028	631461	645441	611431	863855	659897	814490	465353	542391	309898	678745	591935	500798	1.0144e+06	1.49677e+06	829843	1.09628e+06	998145	994028	1.77275e-15	1.09612e-05	0.18776	4.36759e-10	0.995238	0.542945	1.60045	1.04048
O75964	3	3	196.08	ATP synthase subunit g, mitochondrial OS=Homo sapiens GN=ATP5L PE=1 SV=3 - [ATP5L_HUMAN]	68731.1	60912.5	23849.7	114276	59359.8	51796.4	102645	101294	79375.5	158498	111418	113902	57269.6	103910	43778	166837	99753.3	68046.2	151686	207457	112642	218566	146569	148347	2.81219e-11	0.00546148	0.634388	1.2751e-07	0.816058	0.50996	1.3786	1.03965
O75352	2	2	113.06	Mannose-P-dolichol utilization defect 1 protein OS=Homo sapiens GN=MPDU1 PE=1 SV=2 - [MPU1_HUMAN]	6369.74	6306.67	4390.44	8672.04	6044.89	4837.32	12072.6	12248.6	8029.06	15824.1	9436.24	8522.55	5420.53	8552.42	6740.46	11405.3	6379.39	5553.42	14849.6	22593.7	10402.7	13256.2	12269.7	8522.45	4.1007e-09	0.00125207	0.995204	2.05341e-06	0.852698	0.266518	1.16109	1.03741
P35613	11	11	698.53	Basigin OS=Homo sapiens GN=BSG PE=1 SV=2 - [BASI_HUMAN]	174858	155298	99538.2	249706	179786	138453	224206	256812	218618	368948	270894	235340	180775	227417	145962	361245	255495	166202	330615	523764	308800	413249	310624	280124	6.3956e-10	0.0969599	0.867822	4.33019e-05	0.658596	0.422514	1.11923	1.03526
Q8TCJ2	3	2	114.38	Dolichyl-diphosphooligosaccharide--protein glycosyltransferase subunit STT3B OS=Homo sapiens GN=STT3B PE=1 SV=1 - [STT3B_HUMAN]	13746.2	9601.03	4468.75	26745.9	19458.4	14673.8	21505.7	22478.3	10717.3	43244.5	24711.5	22480.4	16615.3	17077.8	6926.24	43901.3	23868.1	23071.2	34118.2	49680.2	18077.9	43086.7	41894.8	29400.7	5.97807e-05	0.340121	0.871573	0.000474403	0.710511	0.567712	1.28585	1.00596
Q13428	5	5	341.82	Treacle protein OS=Homo sapiens GN=TCOF1 PE=1 SV=3 - [TCOF_HUMAN]	36556.1	35918.3	24652.6	31317.2	31422.7	44318.8	65068.4	65547.2	54755.8	72315.4	51606.2	68529.9	37913.8	42872.6	30355.2	45640	28537.5	44186.3	67403.1	86487.3	74187.6	57584	53268.1	86038.9	1.06433e-17	2.39031e-06	0.99942	1.85934e-08	0.887828	0.168646	1.05748	1.00095
P16422	7	7	504.36	Epithelial cell adhesion molecule OS=Homo sapiens GN=EPCAM PE=1 SV=2 - [EPCAM_HUMAN]	268474	201624	131057	280623	201251	210573	368146	338588	350211	461957	441215	491450	259536	323687	133484	378737	349311	266978	520510	688590	464221	568071	403460	583566	2.40753e-17	0.000786859	0.909667	1.69465e-07	0.922311	0.404064	1.31943	0.994767
P54709	2	2	82.83	Sodium/potassium-transporting ATPase subunit beta-3 OS=Homo sapiens GN=ATP1B3 PE=1 SV=1 - [AT1B3_HUMAN]	35448.6	30051	16716.1	69450.9	43202.7	45857.9	74266.7	59626.3	69045.3	84435.3	81190.8	93961.2	51964.7	62157.8	28332.6	90732.7	79371.9	56138.8	114477	142403	84517.4	140180	111907	107970	1.02843e-12	4.70801e-05	0.0822324	4.67454e-10	0.942134	0.615042	1.54295	0.990863
P46977	5	4	172.59	Dolichyl-diphosphooligosaccharide--protein glycosyltransferase subunit STT3A OS=Homo sapiens GN=STT3A PE=1 SV=2 - [STT3A_HUMAN]	37886.9	30452.6	23695.3	46233	30166.6	37082.7	61498.7	68765.2	47656.2	90147.9	46175.2	62292.5	40734.1	63220.7	32114.2	63160.2	49090.2	48001.7	87735.5	148039	62451	85414.5	83570.7	69485.4	0.000671732	0.138014	0.894769	0.00034591	0.873528	0.527902	1.38485	0.988167
Q07955	15	13	659.87	Serine/arginine-rich splicing factor 1 OS=Homo sapiens GN=SRSF1 PE=1 SV=2 - [SRSF1_HUMAN]	730576	537624	388476	604294	440242	633094	830725	799309	905237	1.193e+06	907286	1.21884e+06	823698	869335	374533	909078	882132	778538	1.31021e+06	1.62535e+06	1.04757e+06	1.40923e+06	1.1197e+06	1.46862e+06	5.29401e-09	0.00992603	0.717724	1.22954e-06	0.812132	0.475903	1.25912	0.977555
Q8NBJ7	4	4	135.55	Sulfatase-modifying factor 2 OS=Homo sapiens GN=SUMF2 PE=1 SV=2 - [SUMF2_HUMAN]	20071.4	13668.6	19830.5	28631.8	30472.1	26746.3	12483.4	9219.1	11256.1	15477.1	11045.9	12478.3	12467.9	10066.3	18605.4	21906.4	14019.3	14969.8	7122.76	5391.24	9096.43	9799.3	9426.58	9186.77	2.23181e-05	0.0960601	0.770485	0.000109713	-0.954182	-0.599189	-1.47878	0.951981
Q9H9H4	2	2	92.61	Vacuolar protein sorting-associated protein 37B OS=Homo sapiens GN=VPS37B PE=1 SV=1 - [VP37B_HUMAN]	3837	6128.1	2934.74	2912.72	5117.13	6326.88	3527.67	3151.33	1918.61	1187.56	1733.73	1762.47	3644.11	2682.48	4622.41	2619.62	3184.78	6372.51	78.809	2714.88	2840.67	2289.96	1473.73	2417.04	3.64616e-08	0.384677	1	0.00362301	-1.0372	-0.237093	-1.20597	0.946385
Q00325	9	9	493.11	Phosphate carrier protein, mitochondrial OS=Homo sapiens GN=SLC25A3 PE=1 SV=2 - [MPCP_HUMAN]	310714	443738	210451	355652	201248	133420	456162	643225	490981	642824	551288	518169	537087	744051	294692	779755	444995	243027	914360	1.57206e+06	612877	1.22376e+06	661221	672577	1.44988e-09	0.00974696	0.130948	2.28337e-07	0.996599	0.878758	1.77298	0.945407
Q8N6R0	2	2	104.66	Methyltransferase-like protein 13 OS=Homo sapiens GN=METTL13 PE=1 SV=1 - [MET13_HUMAN]	6425.54	6415.18	4806.32	8067.86	6983.18	7008.53	1737.25	2229.85	3970.88	1914.92	1631.4	5118.39	8111.3	5454.37	3207.99	2381.56	4456.45	10846.5	1118.64	1579.84	3473.65	1937.87	3955	3266.48	2.84422e-10	0.0806219	0.99997	0.0365589	-1.25796	-0.204535	-1.37288	0.938724
P48047	12	12	720.55	ATP synthase subunit O, mitochondrial OS=Homo sapiens GN=ATP5O PE=1 SV=1 - [ATPO_HUMAN]	273638	232151	101195	368157	204686	173280	395886	453515	305606	595129	410313	409092	254683	415980	175544	612506	343082	239234	576184	799163	440189	695767	580118	528772	1.74367e-10	0.000119226	0.199316	1.40737e-09	0.925235	0.593021	1.41979	0.935146
Q16836	3	3	112.85	Hydroxyacyl-coenzyme A dehydrogenase, mitochondrial OS=Homo sapiens GN=HADH PE=1 SV=3 - [HCDH_HUMAN]	20978.5	40064.2	27742.3	27273.6	20085.1	16729.7	13595.1	15413.8	17245.8	27200.7	16205.3	10559.4	20124.7	14326.3	21888.2	21684.7	13872.4	13962.4	12007.8	14537.3	11452.8	12293	12306.2	11952.9	0.0035081	0.393553	0.735394	0.00452755	-0.609166	-0.530197	-1.03606	0.909329
Q9UJZ1	13	13	1064.96	Stomatin-like protein 2, mitochondrial OS=Homo sapiens GN=STOML2 PE=1 SV=1 - [STML2_HUMAN]	211737	218678	158380	284962	248007	166920	351285	364000	357901	456690	463316	422231	267568	344733	183645	400466	316300	218692	505232	665947	351006	592890	416581	452546	6.40148e-10	1.338e-06	0.344345	6.11315e-10	0.906377	0.426044	1.21145	0.909207
P63096	14	9	739.76	Guanine nucleotide-binding protein G(i) subunit alpha-1 OS=Homo sapiens GN=GNAI1 PE=1 SV=2 - [GNAI1_HUMAN]	40971.7	34132.5	16531.6	42645.2	29762.9	21125.7	58032.8	54038.3	53308.9	65779.5	55786.8	56705	42407.4	43736.5	20974.6	61503	41669.4	25214.1	69605.5	66941.8	57728.8	72091.2	67442.6	69033.3	1.92075e-20	7.16108e-06	0.82517	1.25719e-08	0.892098	0.34691	1.12137	0.905055
P15170	3	2	107.09	Eukaryotic peptide chain release factor GTP-binding subunit ERF3A OS=Homo sapiens GN=GSPT1 PE=1 SV=1 - [ERF3A_HUMAN]	14028.5	12396.9	17093.9	13135.5	15130.6	17218	9643.12	4828.91	8908.28	11159.9	12665.4	8279.45	11463.9	6142.52	14428.3	8205.74	12944.1	11649.1	9029.12	6889.22	5881.35	7506.6	9563.31	5326.8	1.79719e-08	0.0834889	0.651675	0.000826468	-0.68176	-0.457119	-1.00993	0.886778
P11233	3	3	173.41	Ras-related protein Ral-A OS=Homo sapiens GN=RALA PE=1 SV=1 - [RALA_HUMAN]	26456.5	25365.9	12820.2	27773.5	19112.7	21671.7	41412.4	45703.8	29815.4	46155.6	31961.1	50054.4	31895.1	36989.1	17685.3	42298.9	31322.6	34662.8	51632.7	70554.8	42706.8	51350.6	45329.1	58398.7	4.43893e-09	0.00294969	0.391559	1.03963e-06	0.879787	0.548793	1.26435	0.885039
P31930	10	10	585.63	Cytochrome b-c1 complex subunit 1, mitochondrial OS=Homo sapiens GN=UQCRC1 PE=1 SV=3 - [QCR1_HUMAN]	146591	153708	87989.6	162893	127556	101585	171966	218865	177299	269617	238394	222400	136945	227853	118873	248501	211369	147078	256877	401356	173964	335927	245220	208876	4.47485e-10	0.00375917	0.394469	4.99063e-06	0.734749	0.483006	1.05583	0.867028
P36542	3	3	200.98	ATP synthase subunit gamma, mitochondrial OS=Homo sapiens GN=ATP5C1 PE=1 SV=1 - [ATPG_HUMAN]	40180.7	49661	22989.8	61064.6	37283	25230.6	58024	58804.4	58387	95580.6	81260.7	60247.4	43930.5	64754.7	29040.5	90554.2	70971.4	35036.4	86204.8	124112	58887.1	120498	63581.8	63628.3	5.3431e-06	0.00263394	0.565454	6.17649e-06	0.802419	0.499801	1.12863	0.866695
Q13242	7	5	269.92	Serine/arginine-rich splicing factor 9 OS=Homo sapiens GN=SRSF9 PE=1 SV=1 - [SRSF9_HUMAN]	115134	137432	80626.4	163963	103130	116926	170479	191258	180053	349530	236485	208629	149483	163545	103440	218531	177266	136747	239890	329720	209881	309768	220745	254495	6.04128e-10	0.00394491	0.870827	3.02143e-05	0.897917	0.404026	1.12523	0.864268
O75330	2	2	81.5	Hyaluronan mediated motility receptor OS=Homo sapiens GN=HMMR PE=1 SV=2 - [HMMR_HUMAN]	4385.34	2161.18	2052.02	9746.82	7378.07	7982.54	4804.51	5894.05	6439.71	12675.1	13444.2	19116	11201.3	9654.68	2157.76	4452.61	11519.3	11324.7	12934.2	9061.83	12924.7	13380.9	14660.1	17896.4	1.67421e-11	0.407918	0.96469	0.00836501	0.887931	0.577851	1.26239	0.861241
Q13177	6	3	347.02	Serine/threonine-protein kinase PAK 2 OS=Homo sapiens GN=PAK2 PE=1 SV=3 - [PAK2_HUMAN]	48935	53063.6	54084.5	57391.1	59386.5	55513.8	32366.4	35459.9	25346.9	24891	30785.4	29201.6	39181.8	33599.3	39713.1	36316.3	39462.3	43207.3	25542.2	19794.2	26788.6	21934.7	35805.5	14477.8	1.16946e-16	2.84164e-05	0.141915	1.85266e-09	-0.88305	-0.504453	-1.18584	0.854658
Q9Y6E2	4	2	268.97	Basic leucine zipper and W2 domain-containing protein 2 OS=Homo sapiens GN=BZW2 PE=1 SV=1 - [BZW2_HUMAN]	61122.5	65877.3	60532	57582.1	76103.1	93805.2	42153.5	43258.3	27866.6	24882.8	27828.4	42862.1	60967.1	48250	56196.4	42524.6	49514.4	77875.2	35271.6	24272	35485	24349.2	40671.6	35543.4	2.25307e-22	3.45726e-06	0.901185	3.68896e-07	-0.990709	-0.307617	-1.08534	0.83595
Q14739	3	3	203.38	Lamin-B receptor OS=Homo sapiens GN=LBR PE=1 SV=2 - [LBR_HUMAN]	34683.3	19524.1	14764.2	37521.3	26436.5	21931.8	54424.3	38474.6	41828.8	85946	44786.3	44190.6	39313.6	35863.5	23265.7	56766.7	38961.6	33665.6	66304.5	104315	40249.8	78966.1	54640.3	36185.7	7.92598e-10	0.00675735	0.597477	0.000117447	0.999666	0.557025	1.29753	0.833519
P22695	9	7	600.73	Cytochrome b-c1 complex subunit 2, mitochondrial OS=Homo sapiens GN=UQCRC2 PE=1 SV=3 - [QCR2_HUMAN]	90176	115565	66819.1	133894	85909	63413.6	143097	230057	124690	206954	199467	189031	114906	192936	76535.7	268271	181134	122508	244172	422508	162041	284624	215571	205961	6.55992e-11	0.00377618	0.152781	1.07354e-06	0.976108	0.782944	1.46555	0.833146
P35232	15	15	1026.3	Prohibitin OS=Homo sapiens GN=PHB PE=1 SV=1 - [PHB_HUMAN]	338039	353731	197431	558275	379685	309315	502362	576856	832233	814782	1.30729e+06	1.03191e+06	541180	889667	350409	727869	1.03741e+06	556433	1.09594e+06	2.00541e+06	647926	2.16423e+06	525774	1.10674e+06	0.000275123	0.201746	0.705423	0.00790667	1.24545	0.941435	1.82048	0.832454
Q9Y2X3	11	11	678.56	Nucleolar protein 58 OS=Homo sapiens GN=NOP58 PE=1 SV=1 - [NOP58_HUMAN]	96457.1	108127	61237.7	197551	144892	118684	128191	171203	241167	338079	273114	287248	154384	166923	85638.4	275086	233538	164709	257558	365948	261153	381258	189090	320164	3.29031e-06	0.0235625	0.754534	0.000225625	0.985142	0.571478	1.28803	0.827455
Q15645	3	2	147.02	Pachytene checkpoint protein 2 homolog OS=Homo sapiens GN=TRIP13 PE=1 SV=2 - [PCH2_HUMAN]	9756.52	17753	11304.4	15203.3	12886.5	21062.2	8215.76	11242.4	5037.11	8825.02	9061.43	10233	6150.21	11843.8	9576.71	6510.11	10309.6	10532.8	4126.61	5270.97	5489.46	8161.2	5436.29	10482.4	2.75684e-15	0.0182521	0.0500583	1.02982e-06	-0.741478	-0.679529	-1.17469	0.826664
Q9NV31	3	2	139.82	U3 small nucleolar ribonucleoprotein protein IMP3 OS=Homo sapiens GN=IMP3 PE=1 SV=1 - [IMP3_HUMAN]	11656.3	11918.8	9239.28	7787.21	10249.4	14860.1	13732	19732	24253.1	22711.9	19068.2	30798.1	19959.2	17826.3	10702.3	10994.7	13953.6	18269	26141.1	28510.8	18632.1	23694.8	15665.5	35670.9	2.00143e-16	0.000403895	0.613117	9.30916e-06	0.987575	0.480865	1.17446	0.799798
Q99623	19	18	1204.9	Prohibitin-2 OS=Homo sapiens GN=PHB2 PE=1 SV=2 - [PHB2_HUMAN]	200234	241197	152590	324340	231578	184678	293166	357778	592860	521099	951685	762007	347036	630379	224810	488172	739240	341416	791965	1.35567e+06	448961	1.47513e+06	324884	745742	0.00327394	0.216276	0.706808	0.00968123	1.38208	1.05401	1.946	0.798824
Q9BZE4	7	7	381.56	Nucleolar GTP-binding protein 1 OS=Homo sapiens GN=GTPBP4 PE=1 SV=3 - [NOG1_HUMAN]	53812.9	39923.6	51190.3	74599.9	62819.8	71631.1	80594.1	68125.9	158294	128967	196627	178267	92097.3	85460.2	45552.6	94325.6	101818	83251.2	128498	157825	158382	195945	82227.9	183255	9.70701e-06	0.0534248	0.982156	0.0063192	1.19582	0.505478	1.35606	0.797076
P56182	5	5	340.47	Ribosomal RNA processing protein 1 homolog A OS=Homo sapiens GN=RRP1 PE=1 SV=1 - [RRP1_HUMAN]	36746.2	44281.7	24864.2	71696.3	48790.4	43462.6	45766	43299.1	70693.3	86902.4	109834	101162	66979.2	70645.4	41437.4	79064	89506.5	74471.4	84751.3	118325	92129.5	128739	52440.3	110326	0.00612736	0.574573	0.725434	0.0326867	0.762154	0.645487	1.12054	0.796041
P21926	2	2	94.19	CD9 antigen OS=Homo sapiens GN=CD9 PE=1 SV=4 - [CD9_HUMAN]	72421.2	50595.3	50198.6	64541	45733.2	42556.1	95017.6	81210.6	103239	125184	105449	93994.1	111026	86974.6	67724.6	106974	100256	60380.4	201843	177341	87430.8	139589	88185.1	79916	1.65908e-09	0.00331076	0.079035	1.63348e-05	0.889699	0.709972	1.24783	0.780054
O00217	2	2	71.25	NADH dehydrogenase [ubiquinone] iron-sulfur protein 8, mitochondrial OS=Homo sapiens GN=NDUFS8 PE=1 SV=1 - [NDUS8_HUMAN]	12262.5	13988	5547.25	13571.4	12164.5	13232.6	16850	21567	19849.6	21614.1	20479.5	28080.1	17393.7	25472.8	14761.1	23040.9	21184.8	16144.9	23626.8	42096.9	21709.1	30538.5	22374.1	27144.5	2.84545e-05	0.0758617	0.254413	0.000791826	0.859963	0.737631	1.24294	0.778007
Q14103	13	9	689.47	Heterogeneous nuclear ribonucleoprotein D0 OS=Homo sapiens GN=HNRNPD PE=1 SV=1 - [HNRPD_HUMAN]	509370	398416	348704	527536	434478	454321	704307	629638	906670	829552	1.00095e+06	1.0455e+06	663451	644847	384803	763395	779078	630801	977706	986564	986827	1.06087e+06	748100	1.11663e+06	3.00963e-09	0.00425778	0.609304	9.23371e-05	0.936825	0.532616	1.13664	0.773519
Q03252	13	13	764.54	Lamin-B2 OS=Homo sapiens GN=LMNB2 PE=1 SV=4 - [LMNB2_HUMAN]	67693.1	51106.5	45290.3	99673.4	74632.6	50155.4	72757	67430.5	179452	281424	266772	318305	130912	109441	41170.2	111335	195794	99445.6	187067	331032	138435	281970	175784	312873	9.2782e-06	0.0658002	0.927877	0.00182789	1.6101	0.824508	1.87697	0.770955
Q9BPX3	4	3	279.93	Condensin complex subunit 3 OS=Homo sapiens GN=NCAPG PE=1 SV=1 - [CND3_HUMAN]	23804.2	26719.9	21965.3	25828.3	33384.5	35664	20871	22213.5	15525.1	15843.5	19618.7	22285.8	12249.9	13770.9	15565.1	13805.2	15847	20350.6	9539.72	8275.25	15577.2	11728.9	21616.2	13058.1	9.65156e-20	0.201373	0.000258241	4.32966e-07	-0.524441	-0.869767	-1.06863	0.766478
P56134	4	4	217.42	ATP synthase subunit f, mitochondrial OS=Homo sapiens GN=ATP5J2 PE=1 SV=3 - [ATPK_HUMAN]	49792.8	38961.2	21748.8	56925.2	32406.4	23688.1	70198.9	69173.8	50773.6	96089.3	71238	65805.3	47892.2	71084.6	32390	98456	56005.2	40003.7	85986.3	108112	54241.7	107164	77077.4	75769.5	3.49829e-10	0.000348078	0.154818	1.56762e-06	0.921188	0.629649	1.1854	0.764364
Q15070	3	3	87.06	Mitochondrial inner membrane protein OXA1L OS=Homo sapiens GN=OXA1L PE=1 SV=3 - [OXA1L_HUMAN]	3101.57	4044.69	1495.1	6021.65	3049.31	1549.59	3301.69	4062.31	4498.83	7277.39	8057.97	7624.53	4401.72	5861.62	3951.29	9583.98	6546.61	3212.49	6767.12	8062.91	4100.29	13485	5890.51	7679.77	0.00261955	0.171866	0.273602	0.00357922	0.854279	0.800894	1.25543	0.758489
P21912	2	2	129.69	Succinate dehydrogenase [ubiquinone] iron-sulfur subunit, mitochondrial OS=Homo sapiens GN=SDHB PE=1 SV=3 - [DHSB_HUMAN]	28269.2	25575.1	16096.3	48493.7	30614.6	25434	42443.1	50098.4	31132.2	71202.7	48739.5	48321.6	34494.7	53613.9	23919.1	77240.2	42809.7	38402.2	54305.6	70584.5	41022.2	67556.2	61587.5	62030.6	4.1024e-08	0.0045237	0.0799129	4.18075e-06	0.742574	0.632435	1.03319	0.751405
Q9BQE3	48	8	2901.25	Tubulin alpha-1C chain OS=Homo sapiens GN=TUBA1C PE=1 SV=1 - [TBA1C_HUMAN]	675206	739240	657595	421205	545619	721185	443127	440598	375981	254761	299147	393588	376156	417219	495685	264413	360981	592548	366675	277356	340886	259138	330693	292262	1.09709e-11	0.000937286	0.0325125	3.0693e-06	-0.768533	-0.584789	-1.01002	0.746328
P84103	7	5	404.72	Serine/arginine-rich splicing factor 3 OS=Homo sapiens GN=SRSF3 PE=1 SV=1 - [SRSF3_HUMAN]	253252	151214	196369	400032	276189	232689	289042	189483	528775	794988	745997	562339	369992	262210	191229	686024	665284	319648	510100	427132	545002	985221	602832	577830	0.00311817	0.382428	0.92678	0.0342209	1.0429	0.72438	1.27285	0.720229
Q9UBB4	7	7	473.99	Ataxin-10 OS=Homo sapiens GN=ATXN10 PE=1 SV=1 - [ATX10_HUMAN]	66775.9	88007.9	68942.7	78756.8	116430	123483	60458.8	61515.4	33681.5	39876.5	30608.4	51629.2	65807.6	66536.7	60203.4	51918.3	60913.3	92434.1	39893.9	47247.4	44916.2	42362.6	49654.4	46800.2	3.33091e-30	2.34894e-07	0.245755	3.53013e-07	-0.965458	-0.447255	-1.00172	0.709077
P09874	31	31	1602.82	Poly [ADP-ribose] polymerase 1 OS=Homo sapiens GN=PARP1 PE=1 SV=4 - [PARP1_HUMAN]	792054	582532	343094	1.01543e+06	641584	527232	1.12729e+06	1.09765e+06	1.23646e+06	1.24124e+06	1.33259e+06	1.27938e+06	1.23001e+06	1.16737e+06	613936	1.32082e+06	1.20393e+06	1.29398e+06	1.36099e+06	1.55583e+06	1.62248e+06	1.48751e+06	1.4838e+06	1.49969e+06	1.16728e-12	7.58516e-08	6.34929e-06	4.3853e-10	0.906595	0.80771	1.20739	0.704303
Q9H8H0	8	8	435.34	Nucleolar protein 11 OS=Homo sapiens GN=NOL11 PE=1 SV=1 - [NOL11_HUMAN]	62613.3	41562.8	46313.5	74863.4	58587.5	57231.1	50746.2	59250.7	124404	112301	126366	139150	119331	68134.6	56231.7	87409.5	101541	88978.8	133676	123717	80574.3	135658	87374.7	130905	0.000544498	0.175259	0.600907	0.00995053	0.843545	0.612519	1.02007	0.70057
Q16629	8	6	436.58	Serine/arginine-rich splicing factor 7 OS=Homo sapiens GN=SRSF7 PE=1 SV=1 - [SRSF7_HUMAN]	134894	102843	95200.5	288983	227548	158222	207043	175335	341540	557424	616337	450147	306282	234482	128538	463918	483122	243274	366956	363369	367048	780768	397496	478170	0.00070323	0.0790393	0.537205	0.00431714	1.22027	0.883952	1.45038	0.689269
O96005	5	4	304.95	Cleft lip and palate transmembrane protein 1 OS=Homo sapiens GN=CLPTM1 PE=1 SV=1 - [CLPT1_HUMAN]	22836.6	10449.5	9605.66	20562.7	9106.21	17673.1	30527.9	19584.8	29384	37062.2	23141.3	43020.8	26887.5	35236.8	15785.4	25468.5	31217.7	41548.7	36177.7	62364.7	29404.9	34976	32474.3	32467.2	0.000240096	0.0555876	0.100078	0.00165237	1.0179	0.96502	1.33644	0.673974
Q5T9A4	5	2	248.03	ATPase family AAA domain-containing protein 3B OS=Homo sapiens GN=ATAD3B PE=1 SV=1 - [ATD3B_HUMAN]	23486.1	8600.12	15008.3	24249.5	13025.3	13417.4	33424.2	32206.1	28514	38395.7	28751.7	31231.8	20088.1	24052.3	19252.2	37385.1	20280.2	20521	34120.3	34038.2	35416.5	25158.4	32049.4	35924.3	0.000830531	0.00124361	0.481557	0.000770227	0.977325	0.533896	1.00834	0.667234
O15479	5	2	282.19	Melanoma-associated antigen B2 OS=Homo sapiens GN=MAGEB2 PE=1 SV=3 - [MAGB2_HUMAN]	18925.2	19752.5	12282.5	30730.1	16204.6	14478.2	40125.6	32344.2	37203.6	36618.2	35410.5	35432.3	28008.5	31576	18563	41183.8	32224.2	26282.4	34181.9	37820.8	38351.4	41558.3	41373.9	37524.6	6.39796e-13	2.75437e-09	0.000149578	5.31303e-10	0.950294	0.662268	1.03842	0.643954
Q9BXY0	2	2	105.01	Protein MAK16 homolog OS=Homo sapiens GN=MAK16 PE=1 SV=2 - [MAK16_HUMAN]	5158.84	2859.42	2293.06	5959.74	4415.84	2269.6	4577.64	3893.45	19892.9	9713.81	21662.1	20401.2	13153.1	13128.4	6012.71	10877.4	11500.6	11300.4	18043.9	20703	16634.2	20467.2	6726.59	18566.5	0.000143578	0.073856	0.0777368	0.00132911	1.80364	1.52296	2.1394	0.643118
Q99729	7	5	451.54	Heterogeneous nuclear ribonucleoprotein A/B OS=Homo sapiens GN=HNRNPAB PE=1 SV=2 - [ROAA_HUMAN]	55791.8	38774.1	44849.1	39420.3	36361	26913.8	67739.2	57413.6	152636	84260.7	139498	133325	123008	89748	51507.1	88676.8	120579	68886.3	144434	134172	128417	152403	77893.5	111450	0.000234222	0.0505777	0.191469	0.00350486	1.3908	1.16371	1.62886	0.637641
P02545	45	44	2922.14	Prelamin-A/C OS=Homo sapiens GN=LMNA PE=1 SV=1 - [LMNA_HUMAN]	642899	481028	373227	1.07312e+06	774784	626043	686635	630621	1.99093e+06	2.41086e+06	2.98816e+06	2.6905e+06	2.20105e+06	1.35436e+06	511834	1.82526e+06	3.00173e+06	1.57087e+06	1.83919e+06	2.46202e+06	1.45343e+06	3.60712e+06	1.54136e+06	2.74796e+06	0.00037376	0.0860286	0.124881	0.00274195	1.52113	1.39798	1.7814	0.610256
Q9P035	2	2	148.67	Very-long-chain (3R)-3-hydroxyacyl-[acyl-carrier protein] dehydratase 3 OS=Homo sapiens GN=PTPLAD1 PE=1 SV=2 - [HACD3_HUMAN]	33476.8	22289.3	19261.4	35182.2	35336.5	11733.2	38890.8	42559.4	42620	58578.8	50501	47035.6	48733.7	58327.6	36989.2	47572.9	48933.2	42509.8	66841.9	96770.7	28051.3	64481.8	40418.8	23638.2	0.000241809	0.062789	0.0540644	0.0447854	0.833054	0.847812	1.02566	0.610195
P48651	2	2	124.62	Phosphatidylserine synthase 1 OS=Homo sapiens GN=PTDSS1 PE=1 SV=1 - [PTSS1_HUMAN]	911.593	1121.26	1220.5	2174.07	3739.23	2912.85	6067.43	2256.44	5386.02	5650.57	4037.87	6771.23	1338.36	4858.7	2110.61	5032.15	10067.9	4141.72	4345.23	7231.35	5329.79	8187.78	3779.28	5513.99	0.000568556	0.132829	0.550866	0.0340109	1.32053	1.18946	1.50932	0.601324
Q9Y320	3	3	145.18	Thioredoxin-related transmembrane protein 2 OS=Homo sapiens GN=TMX2 PE=1 SV=1 - [TMX2_HUMAN]	3747.21	2402.48	2002.21	7893.13	6374.44	2276.86	6086.37	4322.6	7569.47	15775.4	9157.18	6466.56	5180.09	7281.29	5206.86	11364.2	11409.2	3717.15	7437.28	9505.68	4887.43	16657.9	8463.26	4450.22	0.00116645	0.0680657	0.242481	0.0487768	0.999561	0.838404	1.05752	0.575376
