# Supplementary material for: Systematic analysis of synergistic proteome modulations in a drug combination of cisplatin and MLN4924
Source: Royal Society of Chemistry journal article supplement (doi:10.1039/c8mo00115d), 2018-09-20
Supplement: c8mo00115d4.xlsx [file c8mo00115d4.xlsx]

## Sheet: Sample List
LC MS run	Identifier
OEII16055_160112141927	Master Mix
OEII16057	Combi (1)
OEII16059	untreated (1)
OEII16063	Cisplatin (1)
OEII16067	MLN4924 (1)
OEII16071	untreated (2)
OEII16073	Combi (2)
OEII16077	MLN4924 (2)
OEII16081	Cisplatin (2)
OEII16083	Master Mix
OEII16085	untreated (3)
OEII16087	Combi (3)
OEII16093	Cisplatin (3)
OEII16095	MLN4924 (3)
OEII16097	Cisplatin (4)
OEII16103	untreated (4)
OEII16107	MLN4924 (4)
OEII16109	Combi (4)
OEII16111	Master Mix
OEII16115	MLN4924 (5)
OEII16119	Cisplatin (5)
OEII16121	untreated (5)
OEII16123	Combi (5)
OEII16125	untreated (6)
OEII16127	MLN4924 (6)
OEII16133	Cisplatin (6)
OEII16135	Combi (6)
